# Supplementary material
Source: PubMed Central journal article supplement (PMC3273723)
Supplement: mmc1.pdf [file mmc1.pdf]

# THE LANCET

## **Supplementary webappendix**

This webappendix formed part of the original submission and has been peer reviewed.  
We post it as supplied by the authors.

Supplement to: Early Breast Cancer Trialists' Collaborative Group (EBCTCG).  
Comparisons between different polychemotherapy regimens for early breast cancer:  
meta-analyses of long-term outcome among 100 000 women in 123 randomised trials.  
*Lancet* 2011; published online Dec 6. DOI:10.1016/S0140-6736(11)61625-5.

# Webappendix: Supplementary figures and tables for “Comparisons between different polychemotherapy regimens for early breast cancer: meta-analyses of long-term outcome among 100 000 women in 123 randomised trials”

## CONTENTS LIST (Click on any listed item with a page number to jump to it.)

Taxanes: Taxane-plus-anthracycline-based regimen vs the same, or more, non-taxane chemotherapy  
Anth vs  $\Delta$ CMF: Any anthracycline-based regimen vs standard CMF (or near-standard CMF)  
Anth vs nil: Any anthracycline-based regimen vs no adjuvant chemotherapy  
 $\Delta$ CMF vs nil: Standard CMF (or near-standard CMF) vs no adjuvant chemotherapy

### Pp 2-6: Main subgroup analyses: splits x regimen, age, nodes, ER, grade

Results just for breast cancer mortality (ie, mortality with recurrence, as calculated by logrank subtraction)

- 2 Taxanes (as text-figure 2)
- 3 Anth vs  $\Delta$ CMF (as text-figure 4)
- 4 Anth vs nil (as text-figure 6)
- 5  $\Delta$ CMF vs nil
- 6 Anth or  $\Delta$ CMF vs nil

### Pp 7-14: More detailed subgroup analyses (with ER and FU duration further split)

Results both for recurrence and for breast cancer mortality; compressed for highly magnified online viewing

- 7-8 Taxanes
- 9-10 Anth vs  $\Delta$ CMF
- 11-12 Anth vs nil
- 13-14  $\Delta$ CMF vs nil

### Pp 15-17: 8-year or 10-year Kaplan-Meier-related graphs for 6 selected subgroups (age <55 / 55-69 years, ER-poor / ER+, poorly differentiated / not)

Results for breast cancer mortality, 6 subgroups / page

- 15 Taxanes
- 16 Anth vs nil
- 17  $\Delta$ CMF vs nil

### Pp 18-20: Kaplan-Meier-related graphs contrasting selected treatment effects

(i) recurrence, (ii) breast cancer mortality, (iii) overall mortality: 3 outcomes x 2 effects (as text figures 1, 3, 5)

- 18 Taxanes (left, control = SAME non-taxane chemo; right, control = MORE non-taxane chemo)
- 19 Anth vs  $\Delta$ CMF (left, dose/cycle  $\geq$ A60/E90 & total dose  $>$ A240/E360 [eg CAF/CEF]; right, Anth=4A60C)
- 20 Anth vs nil or  $\Delta$ CMF vs nil (left, Anth [NB on average, the effect is like that of 4A60C]; right,  $\Delta$ CMF)

**Pp 21-62: 42 forest plots, one line per trial, for 6 different endpoints** (Grey square = data last sent before 2001) Results for early recurrence (years 0-4), any recurrence, breast cancer mortality, death without recurrence in year 0, death without recurrence, overall mortality: 1 outcome / page = 6 endpoints x 7 comparisons

- 21-26 Taxanes
- 27-32 Anth vs  $\Delta$ CMF
- 33-38 Anth vs nil
- 39-44 Anth vs nil or  $\Delta$ CMF vs nil
- 45-50 One anthracycline-based regimen vs another (6 trials)
- 51-56  $\Delta$ CMF vs nil and any other CMF regimen (with lower dose/cycle than  $\Delta$ CMF) vs nil
- 57-62 Any prolonged ( $>$ 1 cycle) polychemotherapy regimen vs nil

**Page 63: Table of non-breast-cancer mortality without recurrence during the first year after randomisation, by age for various chemotherapy comparisons**

**Pp 64-68: One or more references for each trial in the forest plots on pp 21-50 of breast cancer mortality (in the same order as in those forest plots)**

**Pp 69-110 (end): Powerpoint-format presentation of selected figures or parts of figures**  
([Download powerpoint presentation from EBCTCG website](#))

**Notes on statistical methods:** Annual breast cancer mortality rates are by subtraction of mortality rates among women without recurrence from those among all women. Likewise, breast cancer mortality rate ratios (RR $\pm$ 1SE, newer treatment vs control) derive from logrank subtraction (ie, subtraction of logrank analyses of mortality without recurrence from logrank analyses of overall mortality).

Forest plots of recurrence (or of mortality without recurrence) give woman-years before first recurrence, those of overall mortality give woman-years before death and those of mortality without recurrence give numbers randomised. Numbers of women randomised, woman-years and first events generally double-count controls in 2:1 comparisons (and triple-count those in 3:1 comparisons), but calculations of the logrank statistic (O-E) and its variance V are unaffected by this, and do not double- or triple-count controls. If a logrank statistic (O-E) has variance V, then, defining  $z=(O-E)/\sqrt{V}$  and  $b=(O-E)/V$ ,  $RR=\exp(b)$  is the event rate ratio, and is taken to have  $SE=(RR-1)/z$  and 95% CI  $\exp(b\pm 1.96/\sqrt{V})$ . P-values (all of which are two-sided) are obtained by comparing z with a standard normal distribution (so  $z=1.96$  yields  $2p=0.05$ ). In calculating p-values for side-effects (before recurrence), a continuity correction of 0.5 is applied to (O-E).

**P 2: Subgroup analyses of BREAST CANCER MORTALITY (mortality with recurrence, by logrank subtraction), taxane-plus-anthracycline-based regimen vs SAME, or MORE (< doubled or ~doubled) non-taxane cytotoxic chemotherapy** NB First four subgroups are as in forest plots\*.

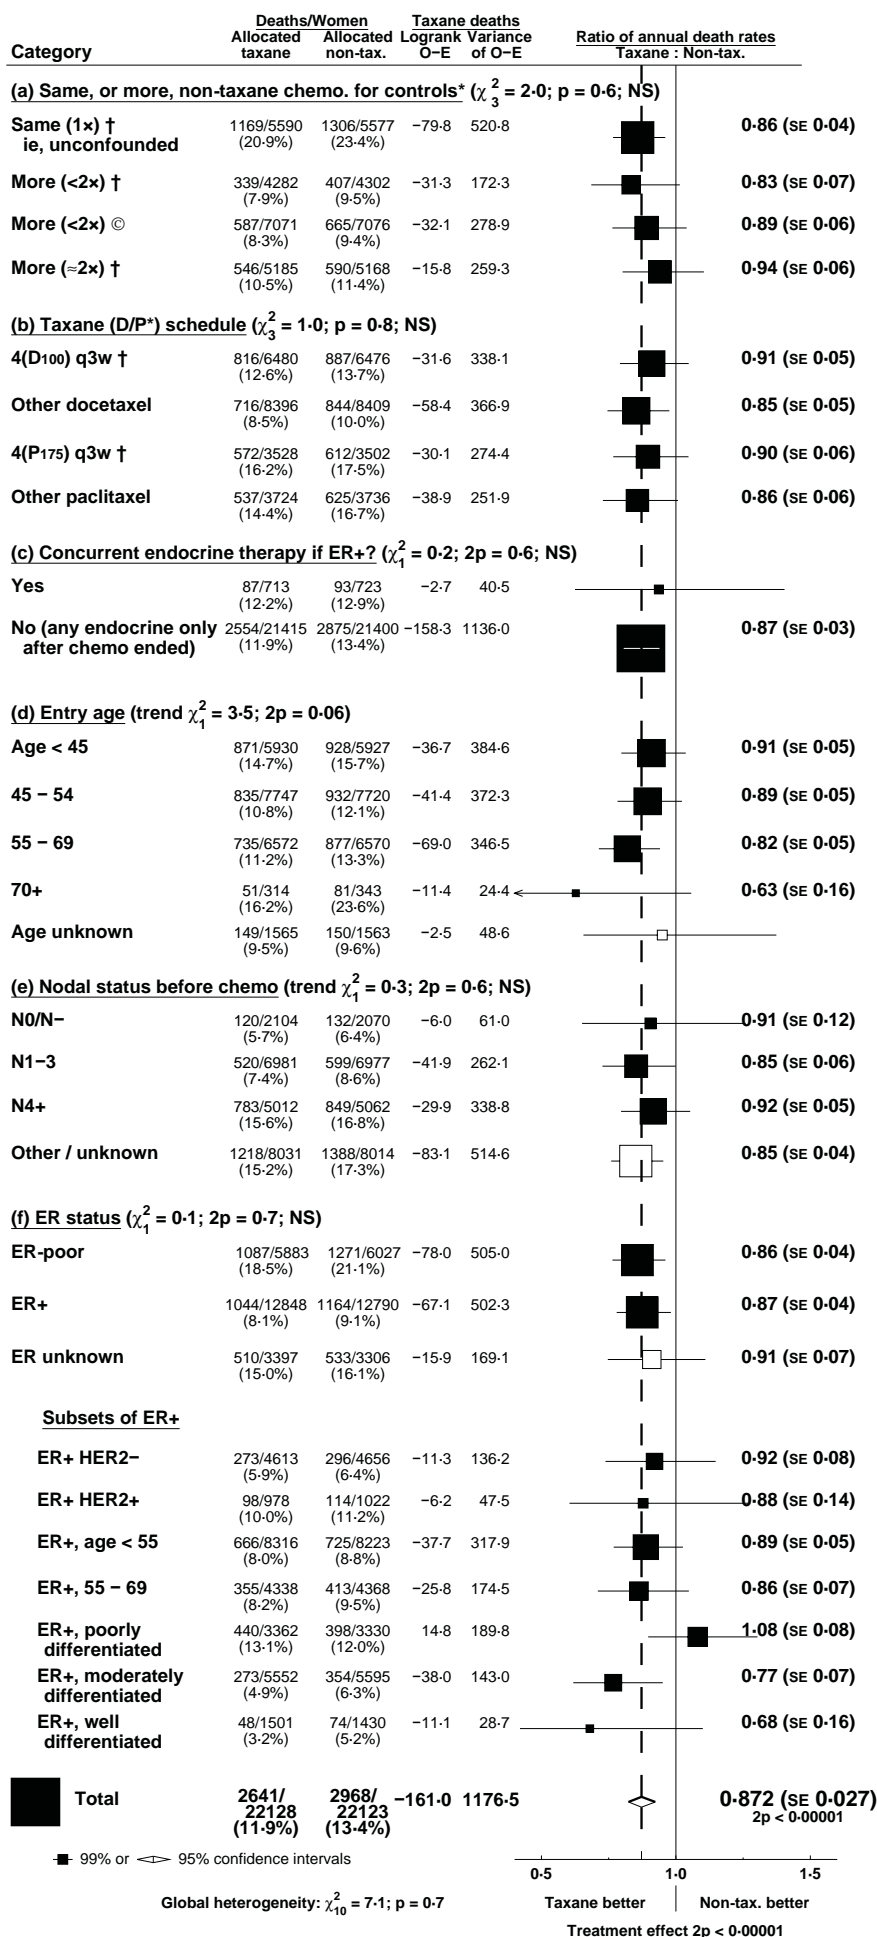

\* Forest plots (webappendix pp 21-26) give details of each trial's cytotoxic regimens  
D = docetaxel; P = paclitaxel; 4(D100) q3w means 4 doses of docetaxel 100 mg/m<sup>2</sup> at intervals of 3 weeks  
† Taxane courses do not overlap other chemotherapy courses  
© Taxane given concurrently with anthracycline

**P 3: Subgroup analyses of BREAST CANCER MORTALITY (mortality with recurrence, by logrank subtraction), any anthracycline-based regimen vs. standard CMF (or near-standard CMF).**  
 NB First four subgroups are as in forest plots\*.

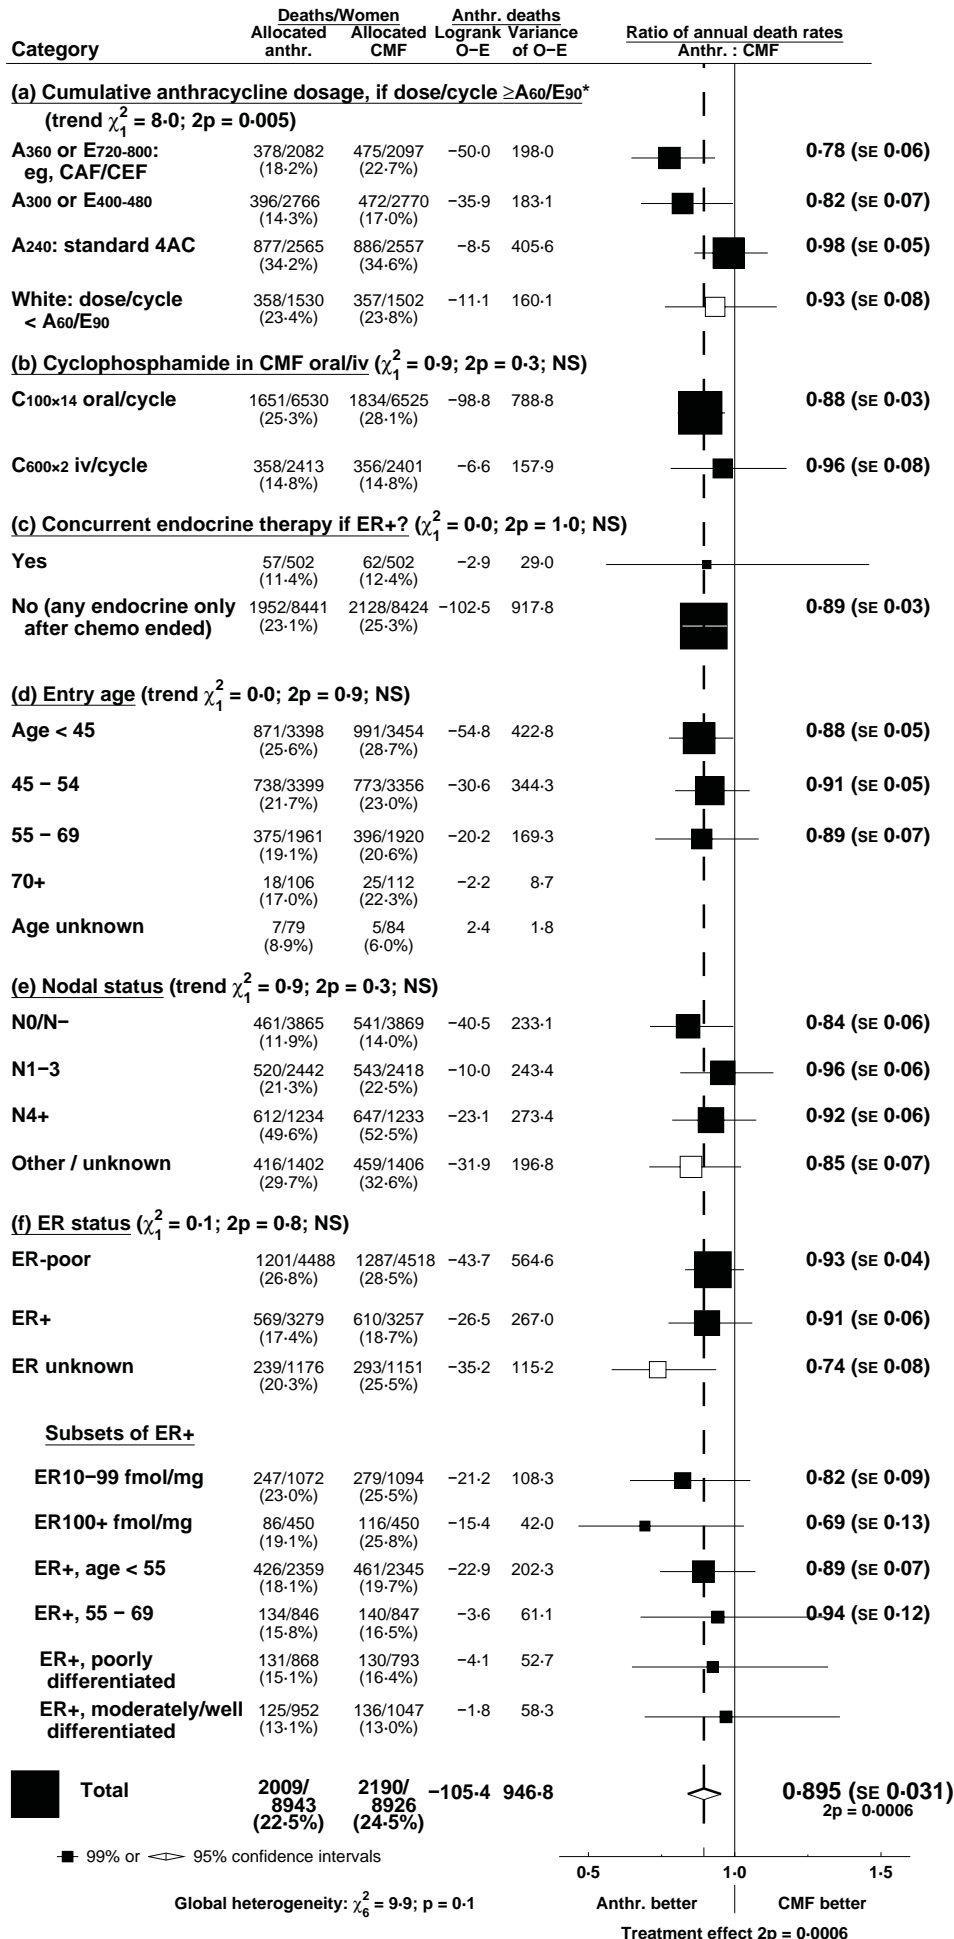

\* Forest plots (webappendix pp 27-32) give details of each trial's cytotoxic regimens  
 Anthracyclines: A = doxorubicin (Adriamycin), E = epirubicin. Other cytotoxics: C = cyclophosphamide, M = methotrexate, F = fluorouracil  
 Dose/cycle (and cumulative dosage) is given after the drug name in mg/m<sup>2</sup>; A60/E90 means 60 mg/m<sup>2</sup> of doxorubicin or 90 mg/m<sup>2</sup> of epirubicin

**P 4: Subgroup analyses of BREAST CANCER MORTALITY (mortality with recurrence, by logrank subtraction), any anthracycline-based regimen vs No chemotherapy**  
 NB First four subgroups are as in forest plots\*

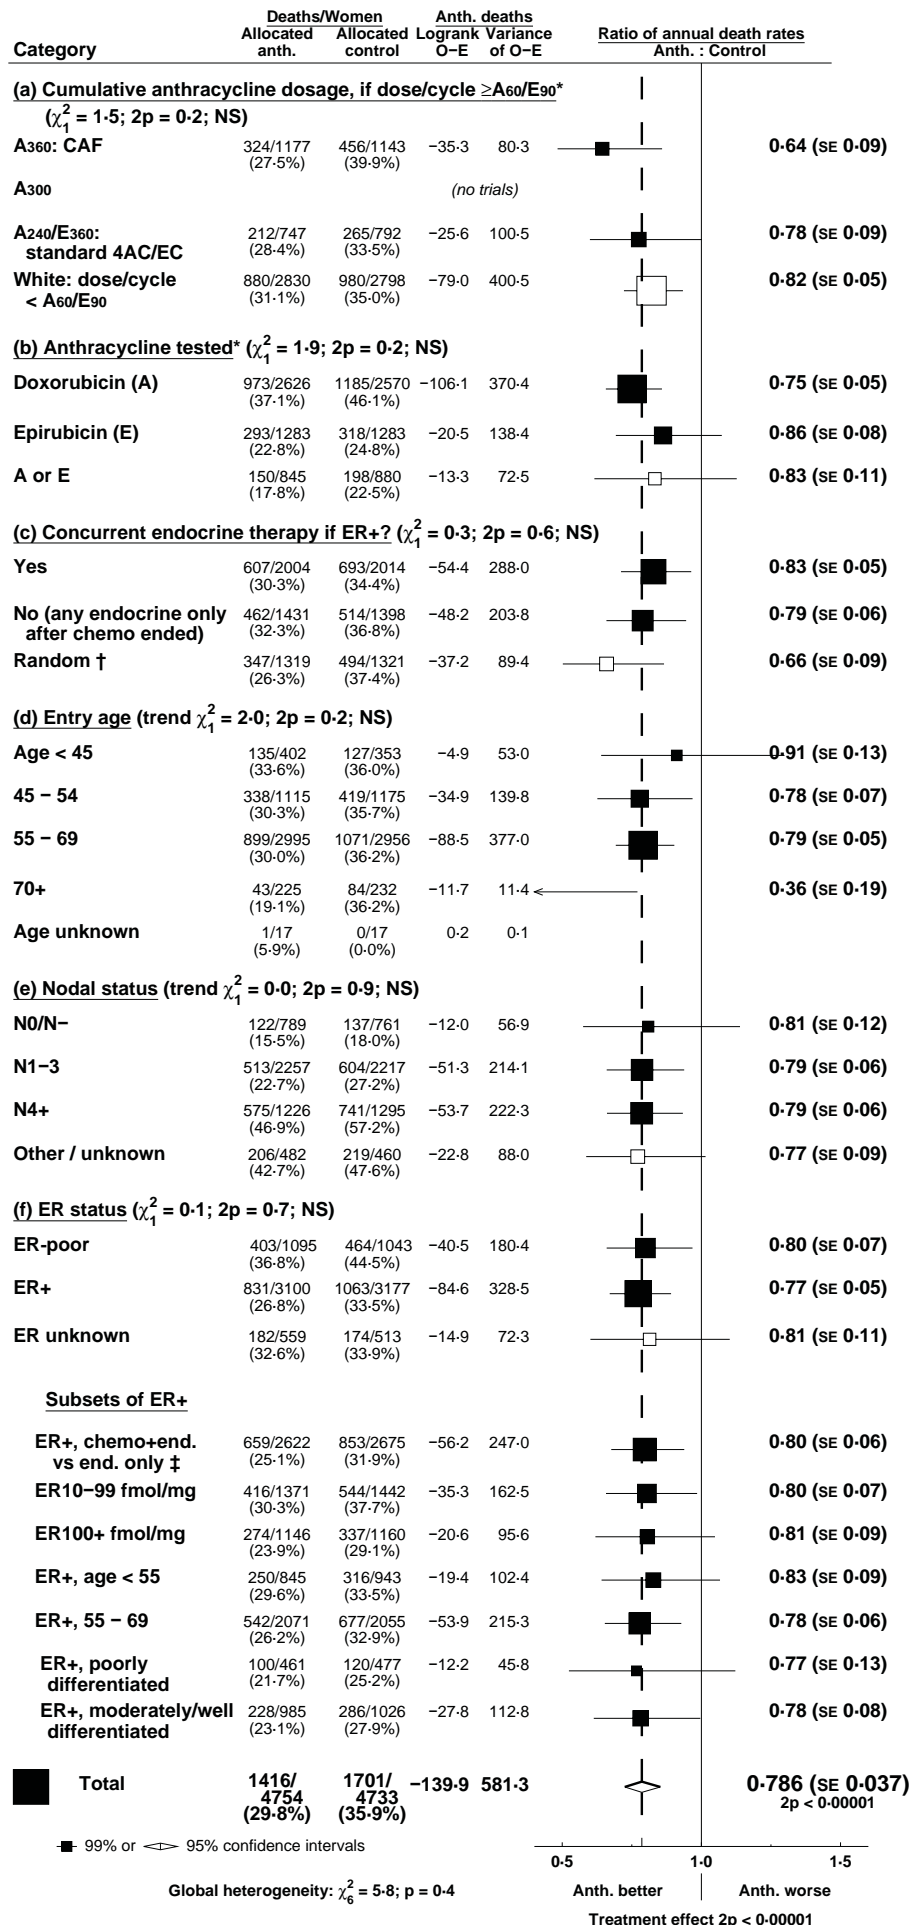

\* Forest plots (webappendix pp 33-38) give details of each trial's cytotoxic regimens  
 Anthracyclines: A = doxorubicin (Adriamycin), E = epirubicin. Other cytotoxics: C = cyclophosphamide, M = methotrexate, F = fluorouracil  
 Dose/cycle (and cumulative dosage) is given after the drug name in mg/m<sup>2</sup>; A<sub>60</sub>/E<sub>90</sub> means 60 mg/m<sup>2</sup> of doxorubicin or 90 mg/m<sup>2</sup> of epirubicin  
 † In the SWOG 8814 trial of CAF in postmenopausal ER+ disease, tamoxifen started randomly with or after the chemotherapy.  
 ‡ chem+end. = chemo-endocrine therapy

**P 5: Subgroup analyses of BREAST CANCER MORTALITY (mortality with recurrence), standard CMF (or near-standard CMF)\* vs. No chemotherapy**

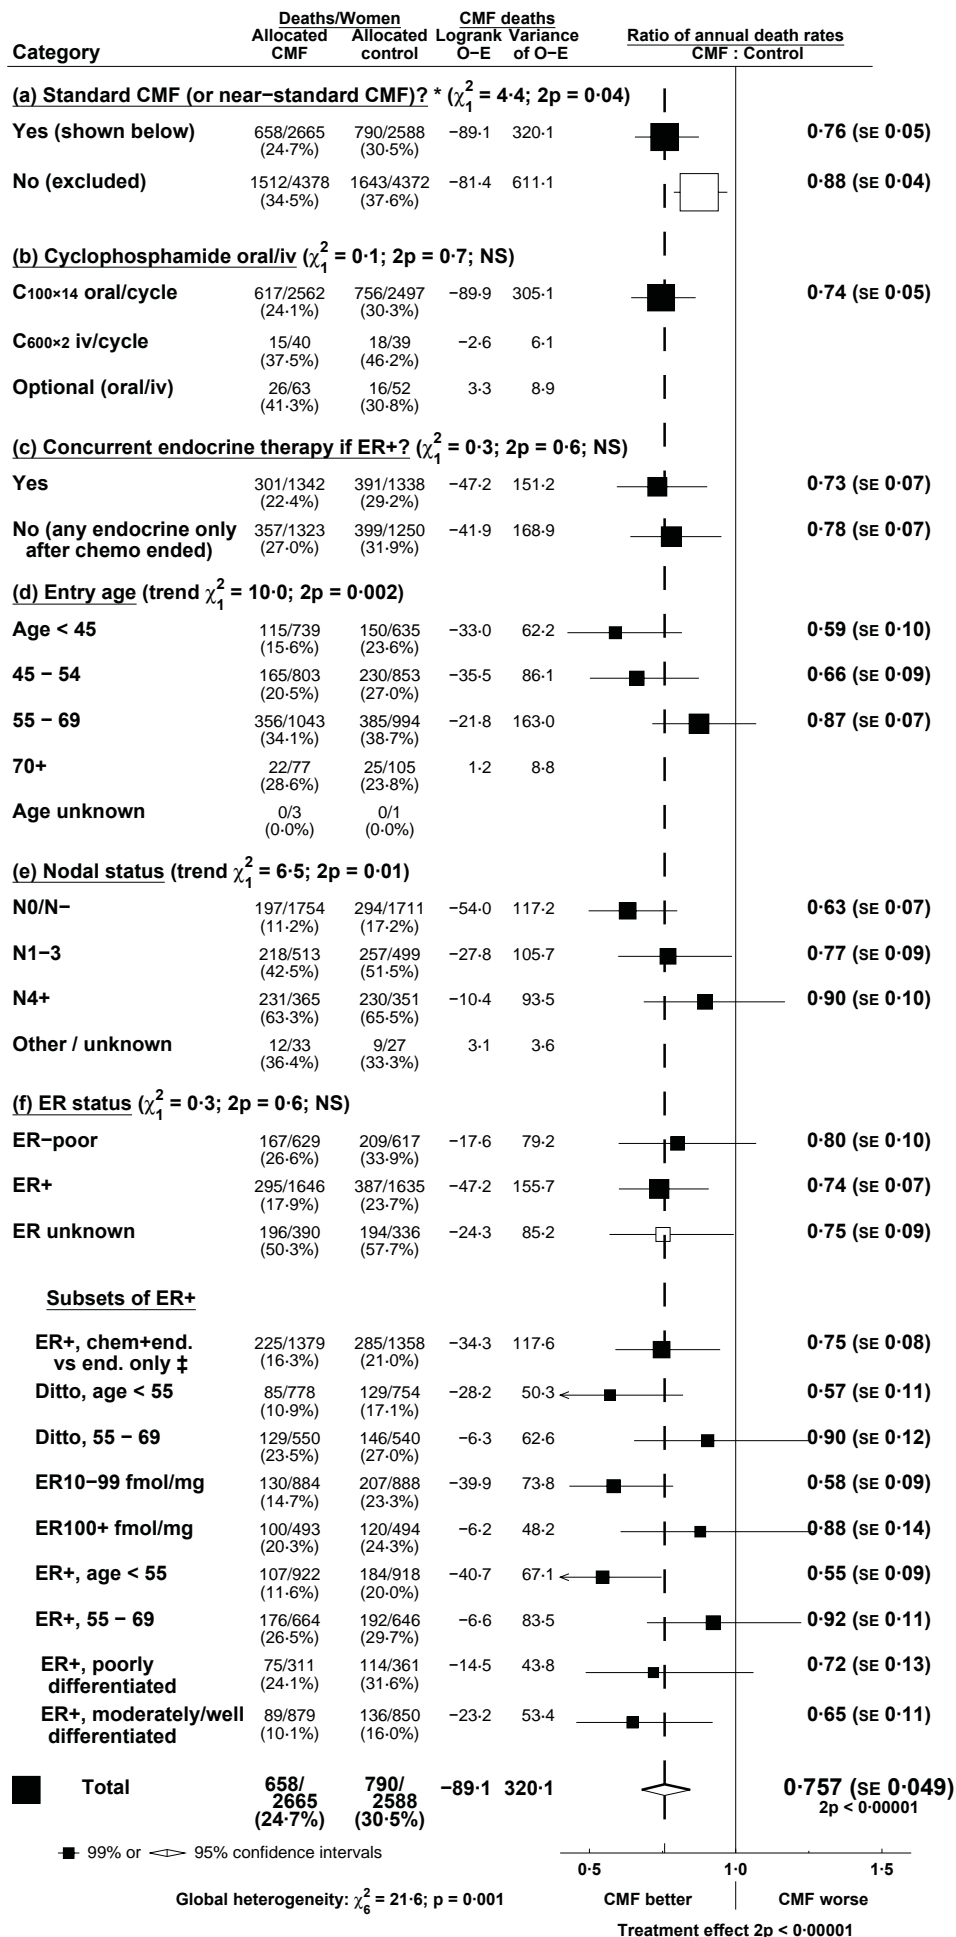

\* See forest plots (webappendix pp 51-56) for details of regimens tested. Except in the first section, all analyses are of standard CMF (or near standard CMF). Trials of other CMF regimens (all with lower dose/cycle of at least one drug) are shown only in the first section (as a white square), and are then excluded.

‡ chem+end. = chemo-endocrine therapy

# P 6: Subgroup analyses of BREAST CANCER MORTALITY (mortality with recurrence), anthracycline-based regimen (eg, standard 4AC) or standard CMF (or near-standard CMF) vs. No chemotherapy

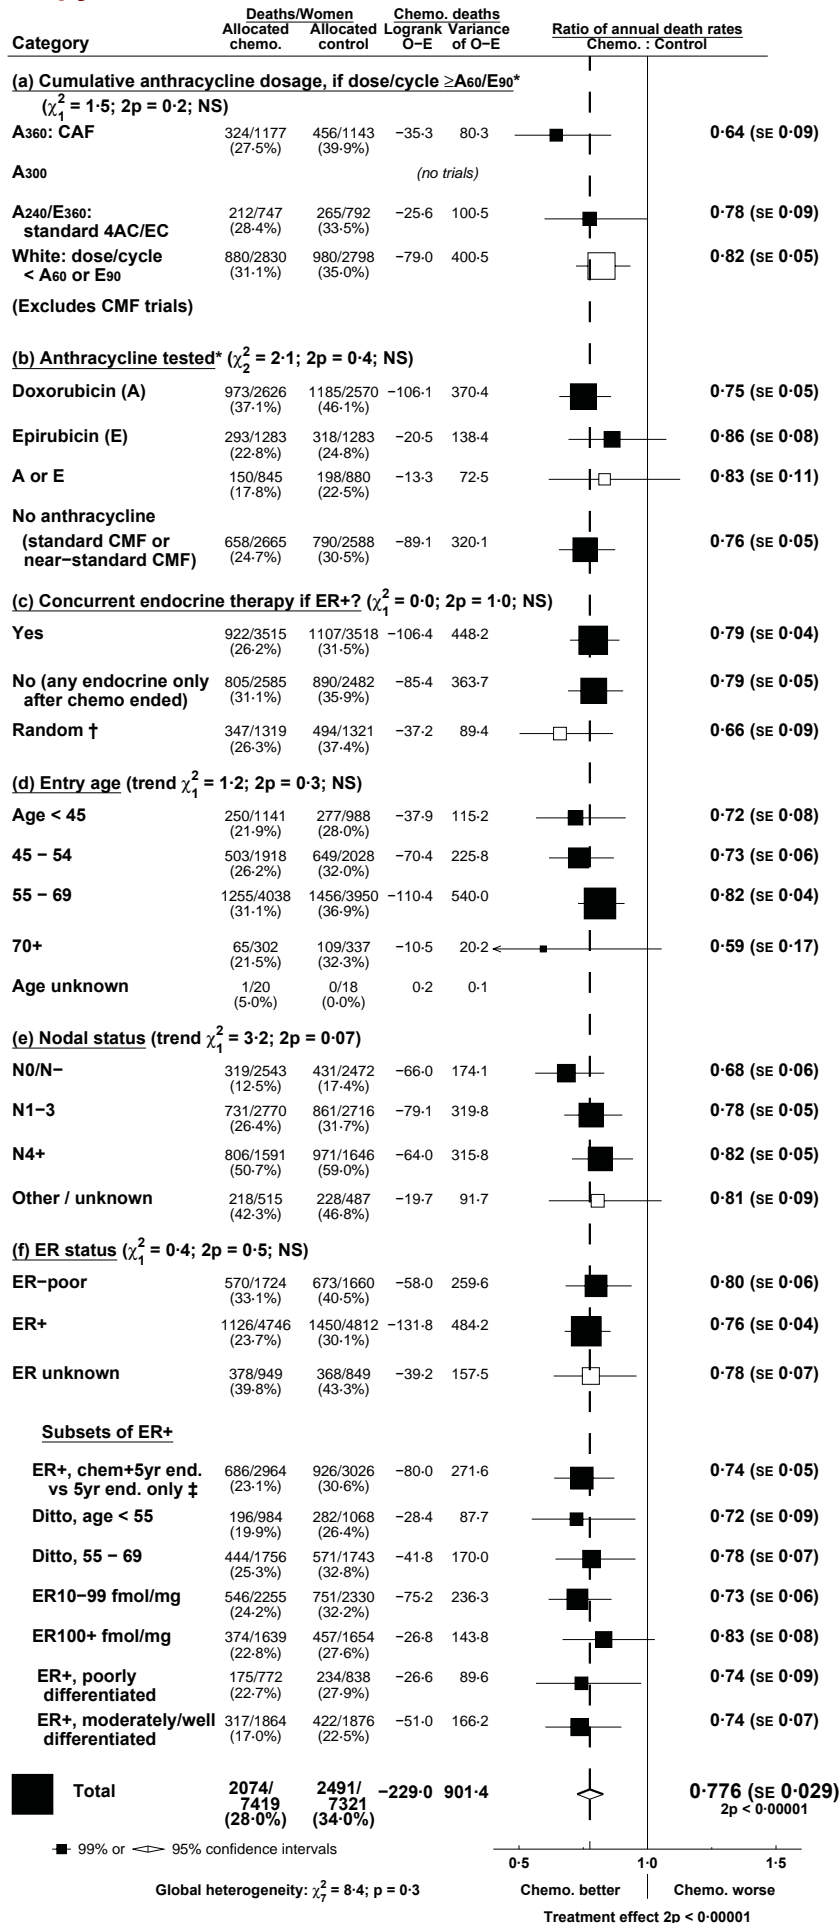

\* Forest plots (webappendix pp 39-44) give details of each trial's cytotoxic regimens  
Anthracyclines: A = doxorubicin (Adriamycin), E = epirubicin. Other cytotoxics: C = cyclophosphamide, M = methotrexate, F = fluorouracil  
Dose/cycle (and cumulative dosage) is given after the drug name in mg/m<sup>2</sup>; A<sub>60</sub>/E<sub>90</sub> means 60 mg/m<sup>2</sup> of doxorubicin or 90 mg/m<sup>2</sup> of epirubicin  
† In the SWOG 8814 trial of CAF in postmenopausal ER+ disease, tamoxifen started randomly with or after the chemotherapy.  
‡ chem+end. = chemo-endocrine therapy; 5yr end. = 5 years of tamoxifen (or, in part of one trial, toremifene)





**P 8: Subgroup analyses of BREAST CANCER MORTALITY (mortality with recurrence, by logrank subtraction), taxane-plus-anthracycline-based regimen vs SAME, or MORE (< doubled or ~doubled) non-taxane cytotoxic chemotherapy** NB First four subgroups are as in forest plots\*.

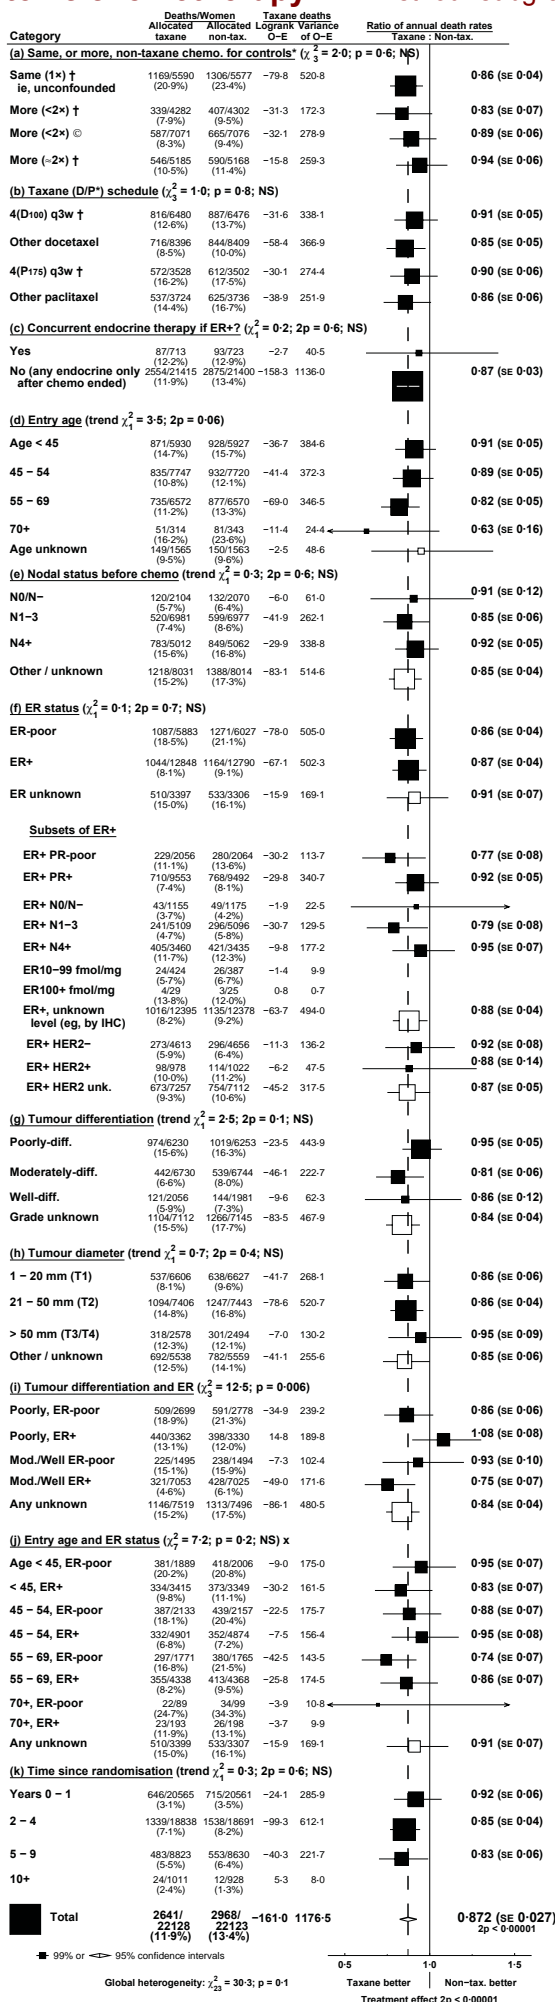

\* Forest plots (webappendix pp 21-26) give details of each trial's cytotoxic regimens  
D = docetaxel; P = paclitaxel; 4(D100) q3w means 4 doses of docetaxel 100 mg/m<sup>2</sup> at intervals of 3 weeks  
† Taxane courses do not overlap other chemotherapy courses  
© Taxane given concurrently with anthracycline



**P 10: Subgroup analyses of BREAST CANCER MORTALITY (mortality with recurrence, by logrank subtraction), any anthracycline-based regimen vs. standard CMF (or near-standard CMF).**  
 NB First four subgroups are as in forest plots\*.

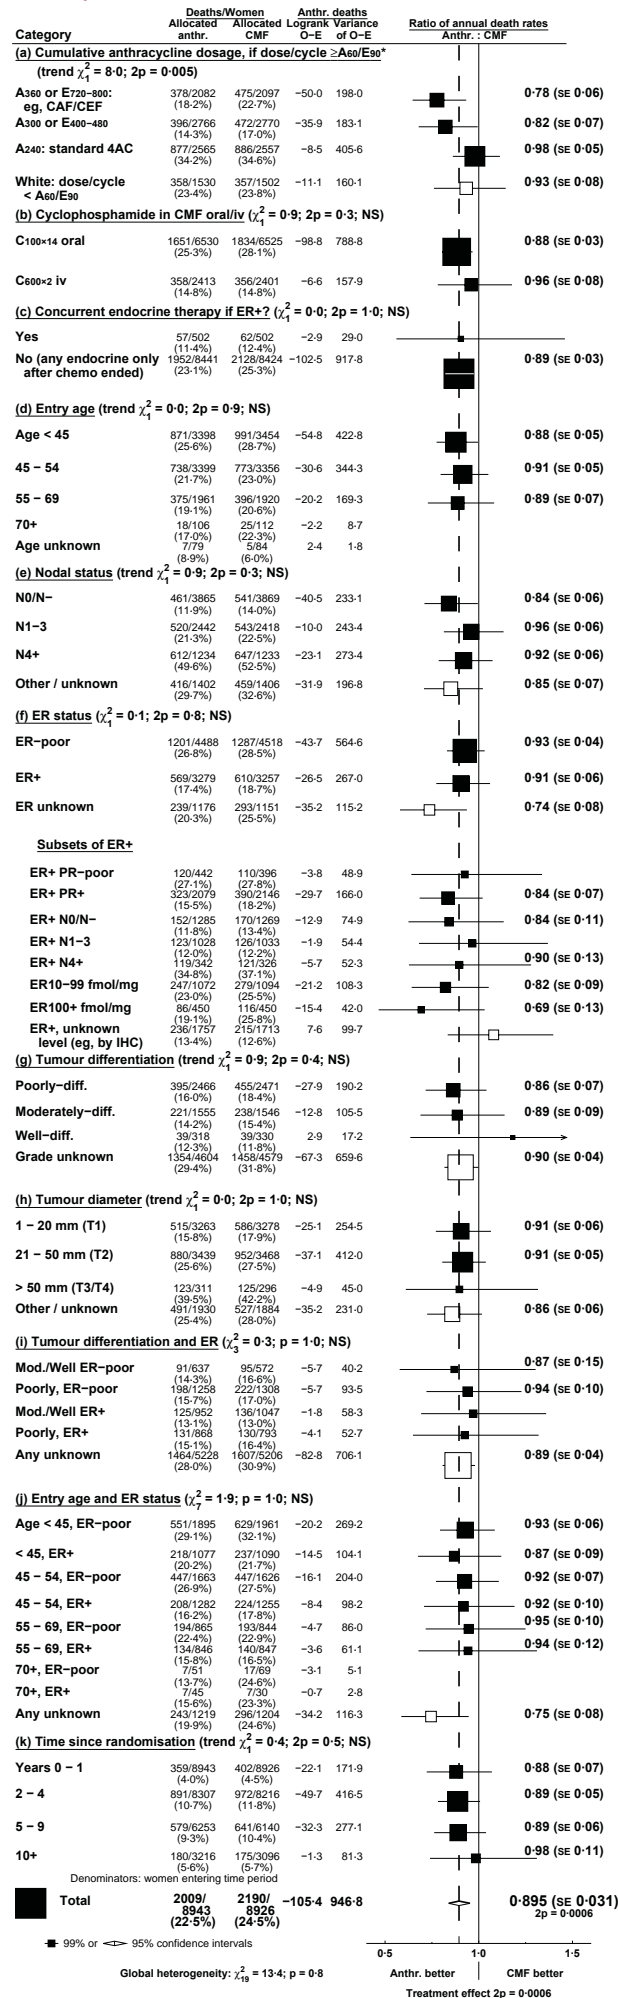

\* Forest plots (webappendix pp 27-32) give details of each trial's cytotoxic regimens  
 Anthracyclines: A = doxorubicin (Adriamycin), E = epirubicin. Other cytotoxics: C = cyclophosphamide, M = methotrexate, F = fluorouracil  
 Dose/cycle (and cumulative dosage) is given after the drug name in mg/m<sup>2</sup>; A50/E50 means 50 mg/m<sup>2</sup> of doxorubicin or 50 mg/m<sup>2</sup> of epirubicin



# P 12: BREAST CANCER MORTALITY (MORTALITY WITH RECURRENCE) in trials of any anthracycline-based regimen (eg, standard 4AC) vs. No chemotherapy

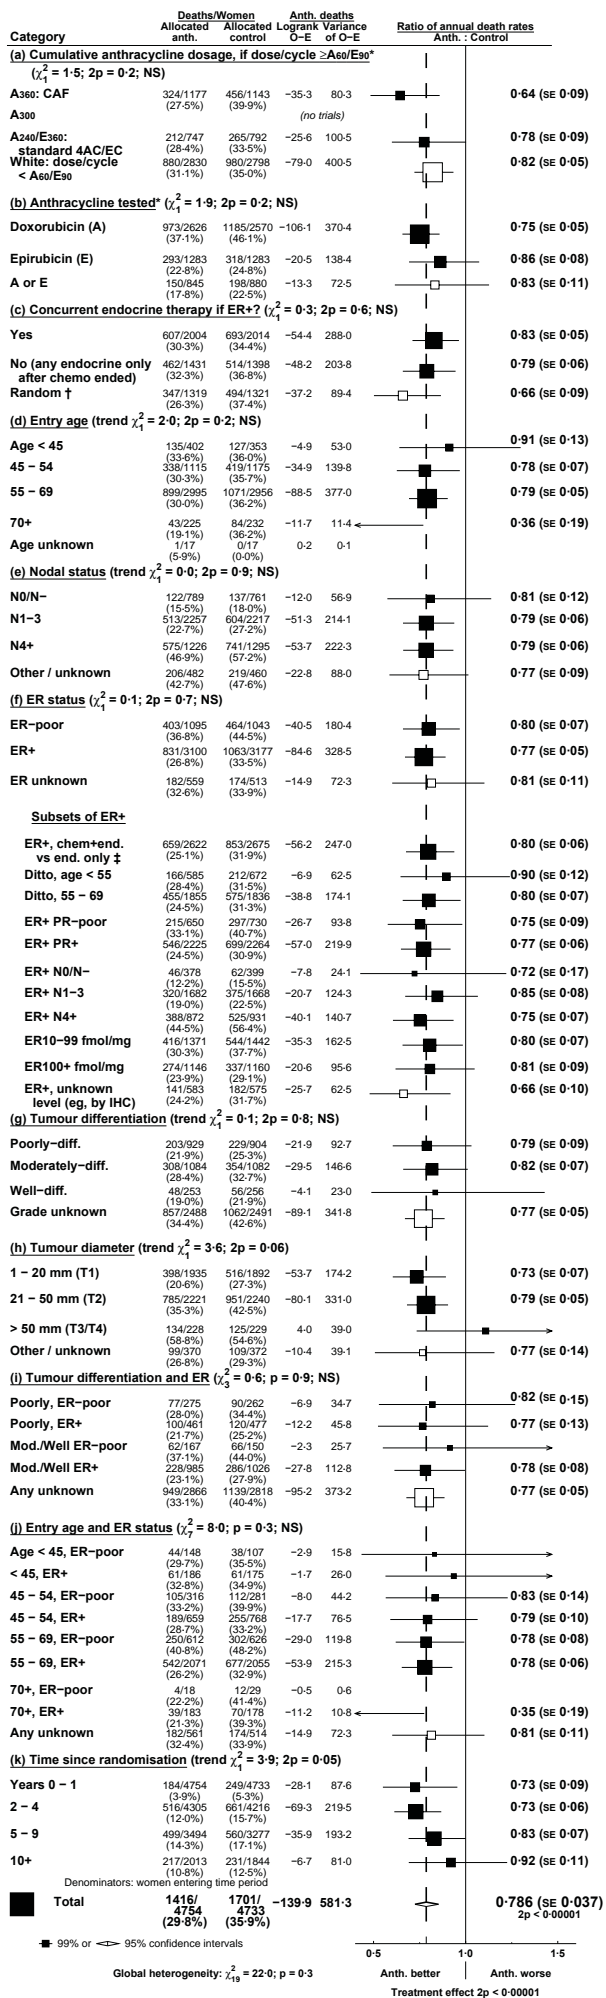

\* Forest plots (webappendix pp 33-38) give details of each trial's cytotoxic regimens  
 Anthracyclines: A = doxorubicin (Adriamycin), E = epirubicin. Other cytotoxics: C = cyclophosphamide, M = methotrexate, F = fluorouracil  
 Dose/cycle (and cumulative dosage) is given after the drug name in mg/m<sup>2</sup>. A60/E90 means 60 mg/m<sup>2</sup> of doxorubicin or 90 mg/m<sup>2</sup> of epirubicin  
 † In the SWOG 8814 trial of CAF in postmenopausal ER+ disease, tamoxifen started randomly with or after the chemotherapy.  
 ‡ chem+end. = chemo-endocrine therapy



# P 14: BREAST CANCER MORTALITY (MORTALITY WITH RECURRENCE) in trials of standard CMF (or near-standard CMF)\* vs. No chemotherapy

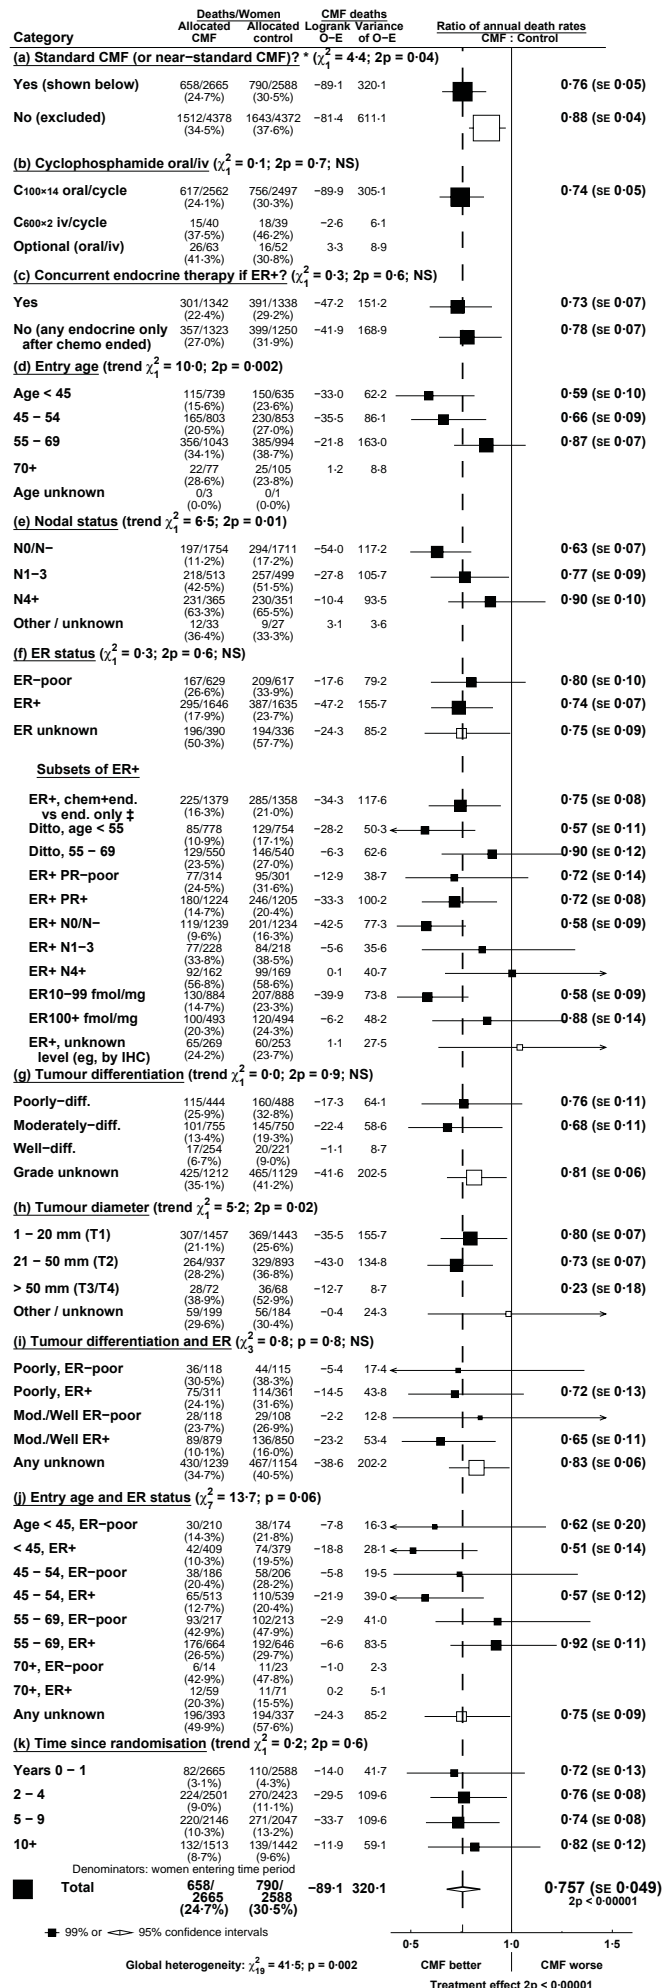

\* See forest plots (webappendix pp 51-56) for details of regimens tested. Except in the first section, all analyses are of standard CMF (or near standard CMF). Trials of other CMF regimens (all with lower dose/cycle of at least one drug) are shown only in the first section (as a white square), and are then excluded.  
‡ chemo+end. = chemo-endocrine therapy

**P 15: Any taxane-plus-anthracycline-based regimen vs control with the SAME or MORE non-taxane chemotherapy (all trials combined): subgroup analyses of 8-year breast cancer mortality RR (and its 95% CI): event rate ratio, from summed logrank statistics for all time periods. Gain (and its SE): absolute difference between ends of graphs.**

**Entry age <55 or 55-69 years**

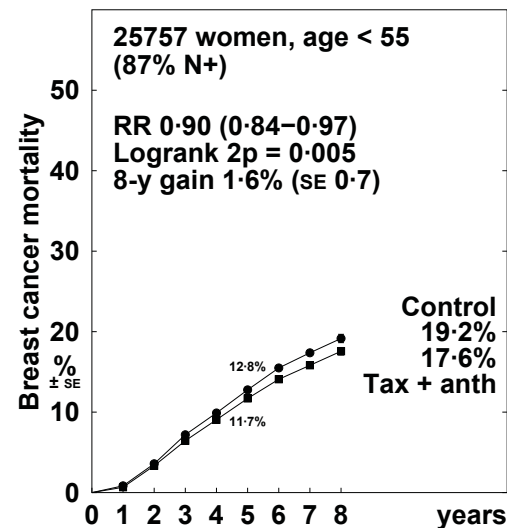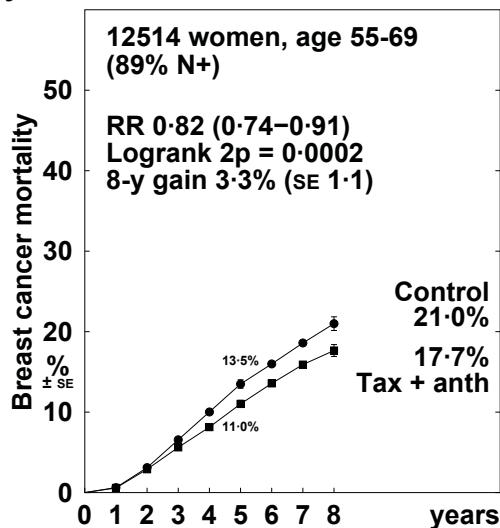

Death rates (% / year: total rate - rate in women without recurrence) and logrank analyses

| Allocation | Years 0 - 4   | Year 5+       |
|------------|---------------|---------------|
| Tax + anth | 2.42 SE 0.07  | 2.36 SE 0.13  |
| Control    | 2.62 SE 0.07  | 2.63 SE 0.15  |
| Rate ratio | 0.91 SE 0.04  | 0.88 SE 0.08  |
| (O-E) / V  | -58.4 / 604.0 | -19.6 / 152.8 |

| Years 0 - 4   | Year 5+      |
|---------------|--------------|
| 2.21 SE 0.09  | 2.64 SE 0.21 |
| 2.69 SE 0.11  | 3.14 SE 0.25 |
| 0.81 SE 0.05  | 0.85 SE 0.11 |
| -57.7 / 275.4 | -11.4 / 71.0 |

**ER status, mainly by immunohistochemistry**

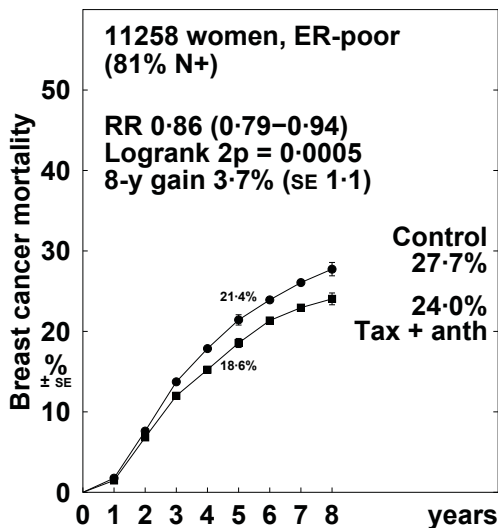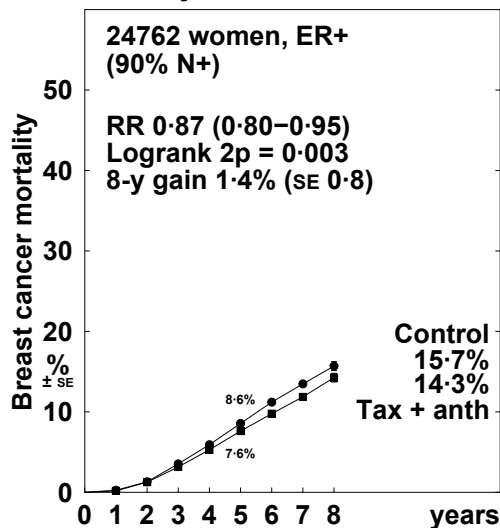

Death rates (% / year: total rate - rate in women without recurrence) and logrank analyses

| Allocation | Years 0 - 4   | Year 5+      |
|------------|---------------|--------------|
| Tax + anth | 4.00 SE 0.13  | 2.44 SE 0.20 |
| Control    | 4.86 SE 0.15  | 2.67 SE 0.23 |
| Rate ratio | 0.85 SE 0.04  | 0.91 SE 0.12 |
| (O-E) / V  | -71.7 / 438.8 | -6.2 / 66.1  |

| Years 0 - 4   | Year 5+       |
|---------------|---------------|
| 1.45 SE 0.05  | 2.51 SE 0.15  |
| 1.62 SE 0.06  | 2.87 SE 0.16  |
| 0.89 SE 0.05  | 0.85 SE 0.08  |
| -44.3 / 365.5 | -22.8 / 136.8 |

**Tumour grade (few were well-differentiated)**

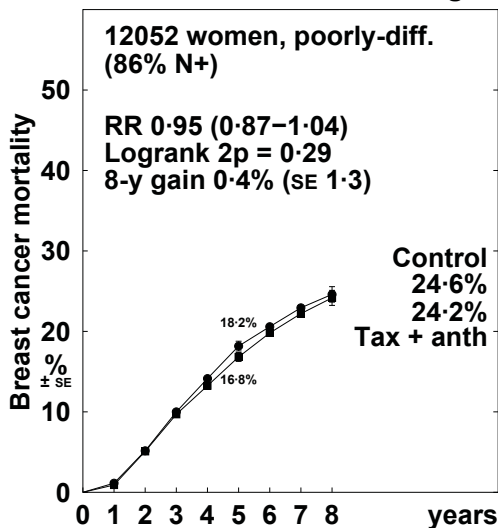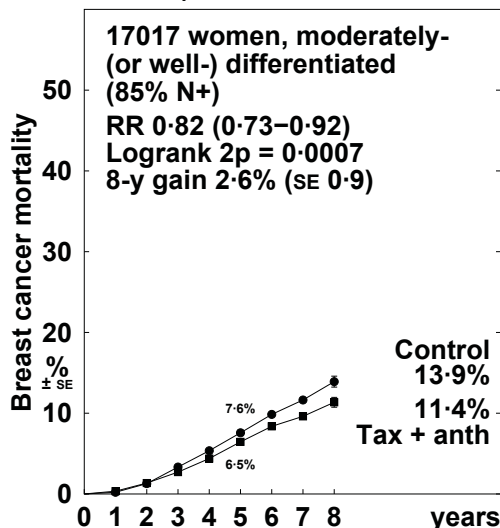

Death rates (% / year: total rate - rate in women without recurrence) and logrank analyses

| Allocation | Years 0 - 4   | Year 5+      |
|------------|---------------|--------------|
| Tax + anth | 3.53 SE 0.12  | 3.07 SE 0.28 |
| Control    | 3.79 SE 0.13  | 2.69 SE 0.28 |
| Rate ratio | 0.93 SE 0.05  | 1.16 SE 0.15 |
| (O-E) / V  | -29.3 / 390.0 | 7.3 / 49.1   |

| Years 0 - 4   | Year 5+      |
|---------------|--------------|
| 1.22 SE 0.06  | 1.85 SE 0.17 |
| 1.45 SE 0.07  | 2.37 SE 0.19 |
| 0.84 SE 0.06  | 0.75 SE 0.11 |
| -37.5 / 216.0 | -19.0 / 64.9 |



**P 16: At least 4 cycles of any anthracycline-based regimen (eg, standard 4AC) vs no adjuvant chemotherapy: subgroup analyses of 10-year breast cancer mortality by age, ER status and tumour grade** RR (and its 95% CI): event rate ratio, from summed logrank statistics for all time periods. Gain (and its SE): absolute difference between ends of graphs.

**Entry age <55 or 55-69 years**

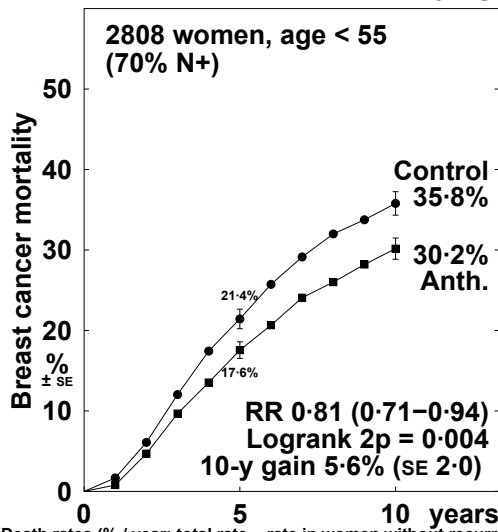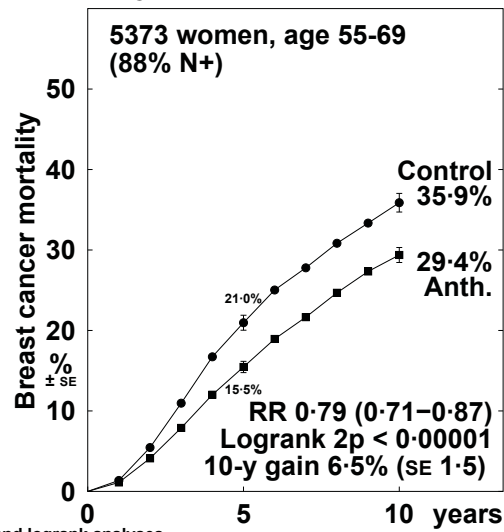

Death rates (% / year: total rate - rate in women without recurrence) and logrank analyses

| Allocation | Years 0 - 4   | Years 5 - 9  | Year 10+     |
|------------|---------------|--------------|--------------|
| Anth.      | 3.81 SE 0.24  | 3.53 SE 0.28 | 1.85 SE 0.25 |
| Control    | 4.77 SE 0.29  | 4.11 SE 0.34 | 2.01 SE 0.28 |
| Rate ratio | 0.79 SE 0.09  | 0.81 SE 0.11 | 0.96 SE 0.21 |
| (O-E) / V  | -25.5 / 108.4 | -13.5 / 63.4 | -0.9 / 21.0  |

| Years 0 - 4   | Years 5 - 9   | Year 10+     |
|---------------|---------------|--------------|
| 3.26 SE 0.16  | 3.63 SE 0.20  | 3.43 SE 0.28 |
| 4.79 SE 0.22  | 4.40 SE 0.27  | 3.65 SE 0.33 |
| 0.71 SE 0.06  | 0.86 SE 0.08  | 0.94 SE 0.13 |
| -65.9 / 193.2 | -19.2 / 125.4 | -3.5 / 58.3  |

**ER status**

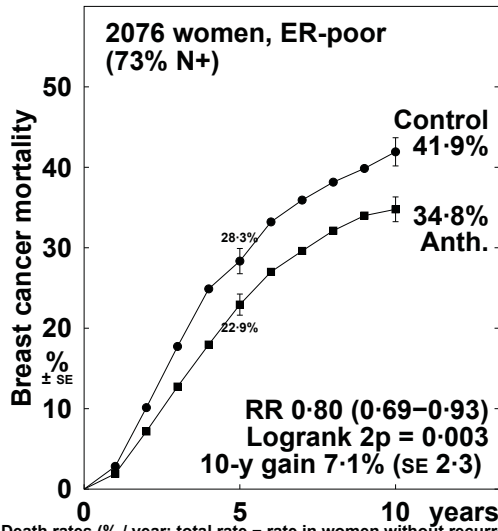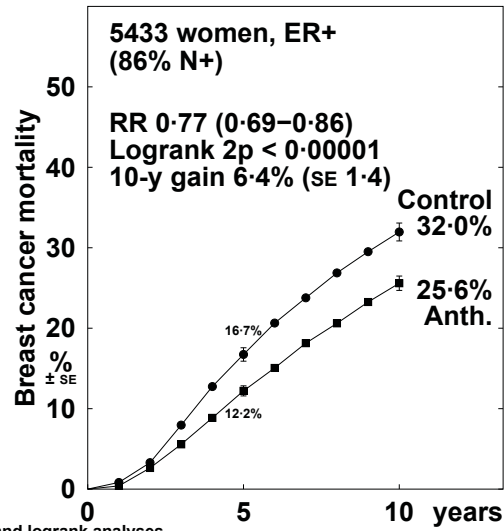

Death rates (% / year: total rate - rate in women without recurrence) and logrank analyses

| Allocation | Years 0 - 4   | Years 5 - 9  | Year 10+     |
|------------|---------------|--------------|--------------|
| Anth.      | 4.96 SE 0.32  | 3.50 SE 0.33 | 2.64 SE 0.36 |
| Control    | 6.84 SE 0.41  | 4.47 SE 0.42 | 2.92 SE 0.41 |
| Rate ratio | 0.76 SE 0.08  | 0.80 SE 0.13 | 0.98 SE 0.20 |
| (O-E) / V  | -29.2 / 107.7 | -10.8 / 48.7 | -0.5 / 24.1  |

| Years 0 - 4   | Years 5 - 9   | Year 10+     |
|---------------|---------------|--------------|
| 2.60 SE 0.14  | 3.40 SE 0.19  | 3.09 SE 0.26 |
| 3.63 SE 0.19  | 4.17 SE 0.25  | 3.14 SE 0.30 |
| 0.71 SE 0.07  | 0.81 SE 0.08  | 0.92 SE 0.14 |
| -54.3 / 156.2 | -26.4 / 123.3 | -4.0 / 48.9  |

**Tumour grade (few were well-differentiated)**

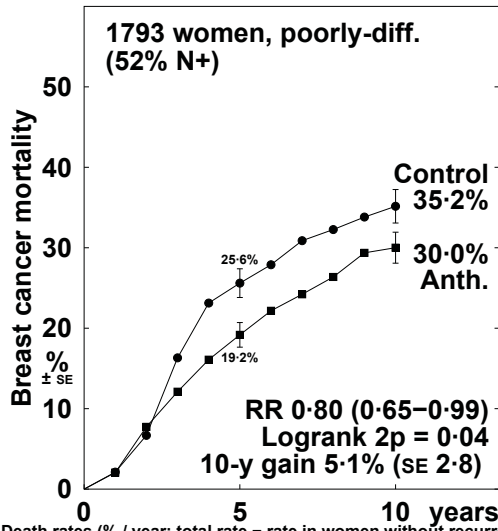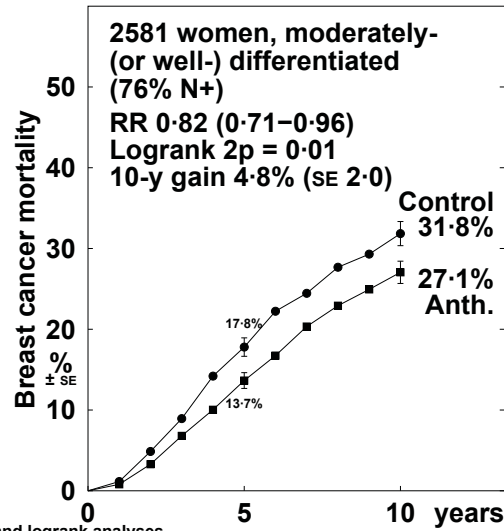

Death rates (% / year: total rate - rate in women without recurrence) and logrank analyses

| Allocation | Years 0 - 4  | Years 5 - 9  | Year 10+     |
|------------|--------------|--------------|--------------|
| Anth.      | 4.31 SE 0.36 | 2.98 SE 0.40 | 0.76 SE 0.31 |
| Control    | 5.73 SE 0.44 | 2.88 SE 0.43 | 0.58 SE 0.29 |
| Rate ratio | 0.73 SE 0.11 | 1.05 SE 0.22 | 1.07 SE 0.78 |
| (O-E) / V  | -20.6 / 65.5 | 1.0 / 22.1   | 0.1 / 1.7    |

| Years 0 - 4  | Years 5 - 9  | Year 10+     |
|--------------|--------------|--------------|
| 2.85 SE 0.22 | 3.45 SE 0.30 | 2.51 SE 0.36 |
| 3.89 SE 0.26 | 3.91 SE 0.34 | 2.67 SE 0.40 |
| 0.74 SE 0.09 | 0.89 SE 0.12 | 1.02 SE 0.23 |
| -25.7 / 86.4 | -6.5 / 58.5  | 0.4 / 20.1   |

# P 17: Standard CMF (or near-standard CMF) vs no adjuvant chemotherapy: subgroup analyses of 10-year breast cancer mortality by age, ER status and tumour grade

RR (and its 95% CI): event rate ratio, from summed logrank statistics for all time periods. Gain (and its SE): absolute difference between ends of graphs.

## Entry age <55 or 55-69 years

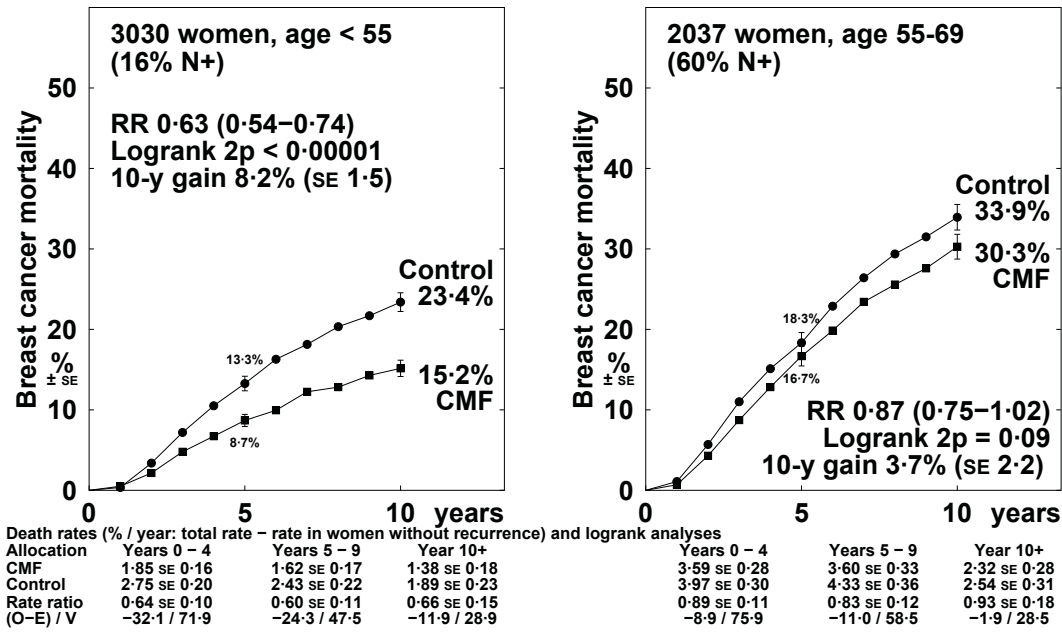

## ER status

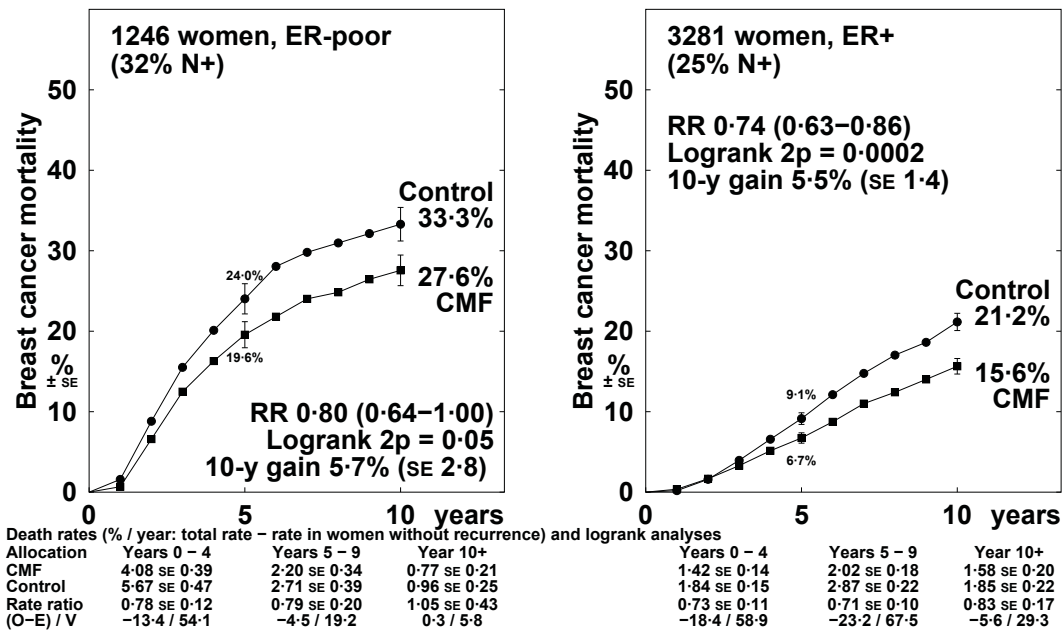

## Tumour grade (few were well-differentiated)

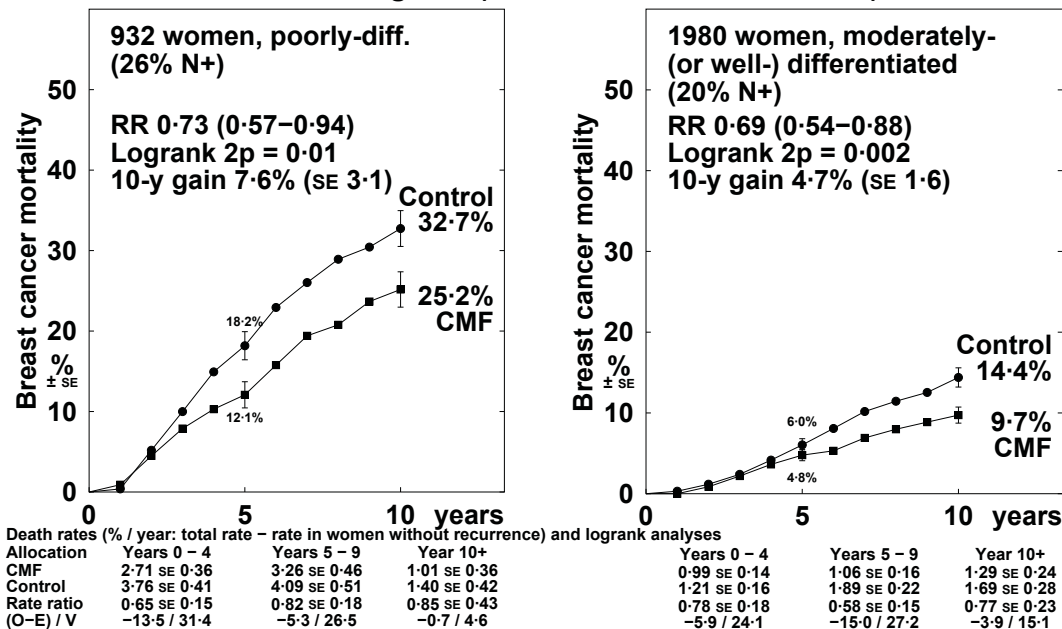

**P 18: Taxane-plus-anthracycline-based regimen vs control with Left: the SAME, or Right: MORE, non-taxane chemotherapy**

Time to recurrence, breast cancer mortality and overall mortality. Trials vs the SAME non-taxane chemotherapy (usually 4AC) just added 4 extra taxane-only cycles. RR (and its 95% CI): event rate ratio, from summed logrank statistics for all time periods. Gain (and its SE): absolute difference between ends of graphs.

**Recurrence**

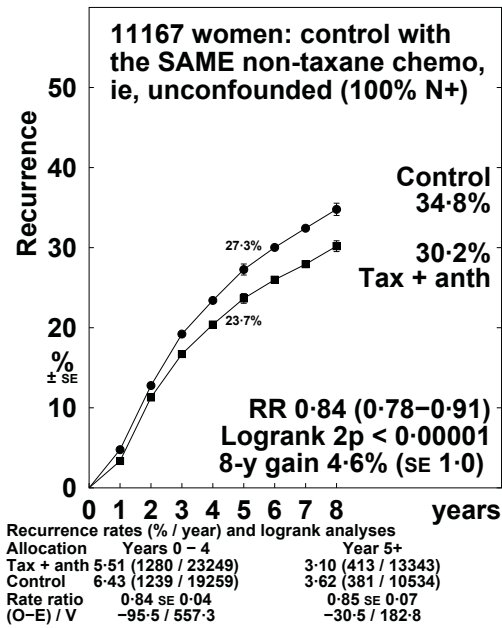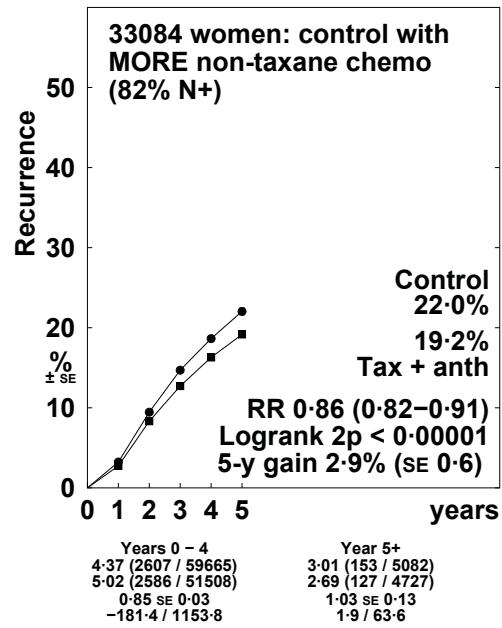

**Breast cancer mortality**

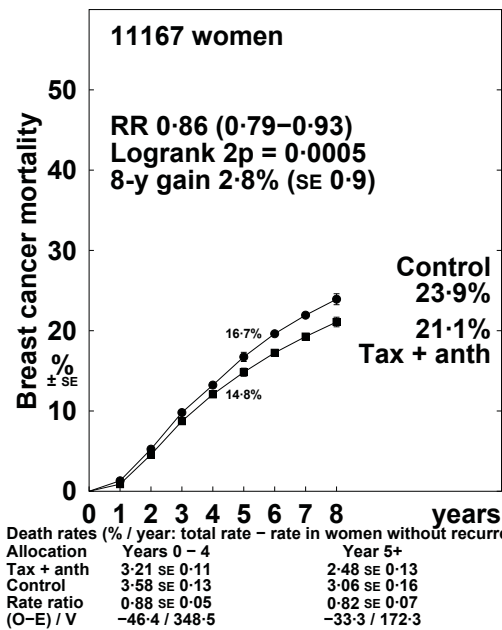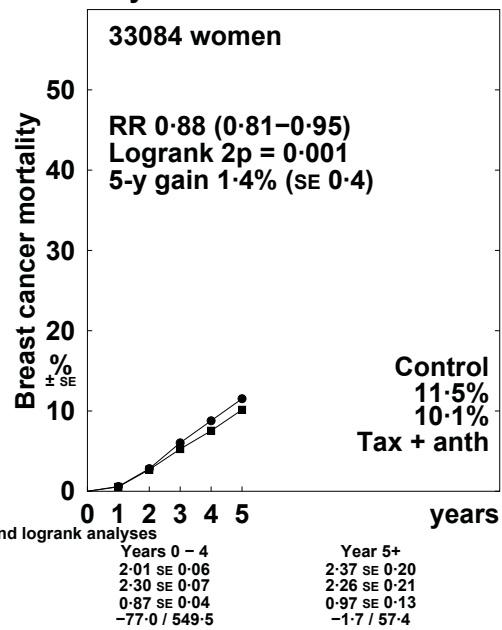

**Overall mortality**

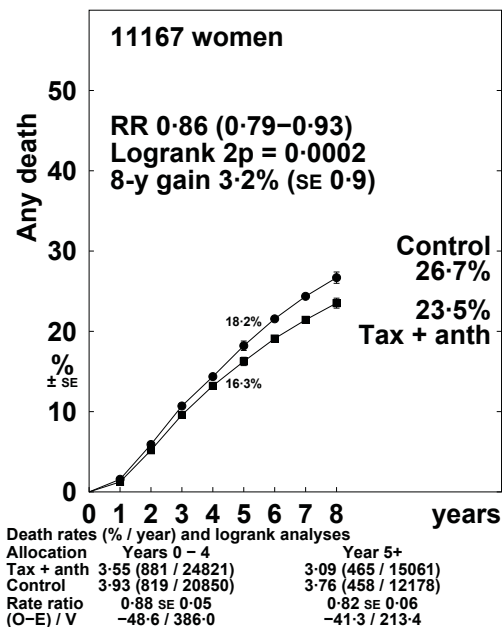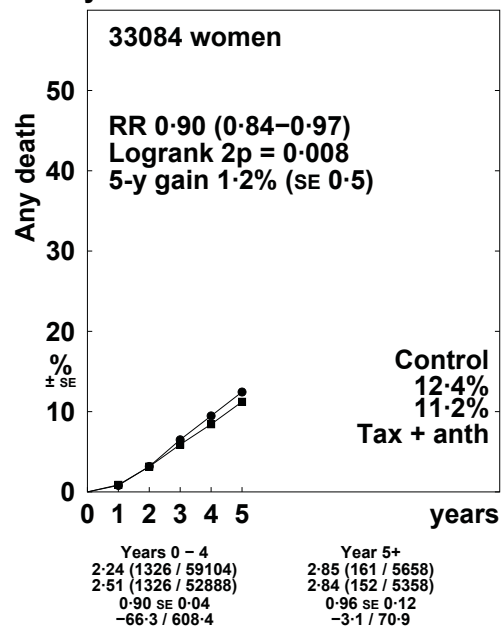

**P 19: Selected anthracycline-based regimens vs standard CMF (or near-standard CMF)**  
**Left: regimens with cumulative dosage > 240 mg/m<sup>2</sup> doxorubicin or 360 mg/m<sup>2</sup> epirubicin (eg, CAF or CEF), Right: standard 4AC (cumulative dosage 240 mg/m<sup>2</sup> doxorubicin)**

(All graphs exclude regimens with < 60 mg/m<sup>2</sup> doxorubicin or 90 mg/m<sup>2</sup> epirubicin per cycle)

Time to recurrence, breast cancer mortality and overall mortality. RR (and its 95% CI): event rate ratio, from summed logrank statistics for all time periods. Gain (and its SE): absolute difference between ends of graphs.

**Recurrence**

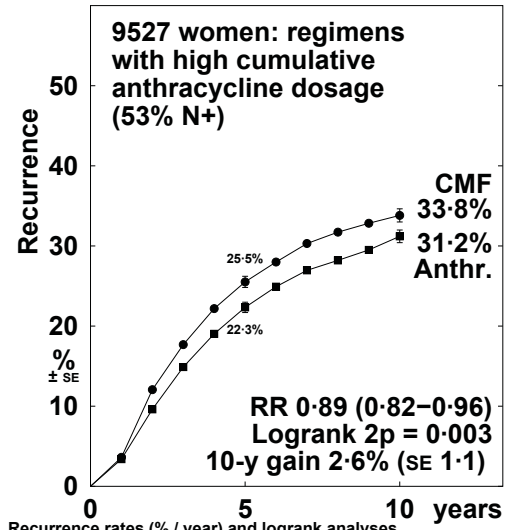

Recurrence rates (% / year) and logrank analyses

| Allocation           | Years 0 - 4                   | Years 5 - 9                 | Year 10+                   |
|----------------------|-------------------------------|-----------------------------|----------------------------|
| Anthr.               | 5.05 (989 / 19575)            | 2.45 (238 / 9723)           | 1.64 (65 / 3973)           |
| CMF                  | 6.01 (1104 / 18377)           | 2.57 (237 / 9236)           | 1.35 (54 / 4007)           |
| Rate ratio (O-E) / V | 0.85 SE 0.04<br>-74.9 / 457.0 | 1.00 SE 0.10<br>0.1 / 106.9 | 1.12 SE 0.21<br>1.2 / 26.4 |

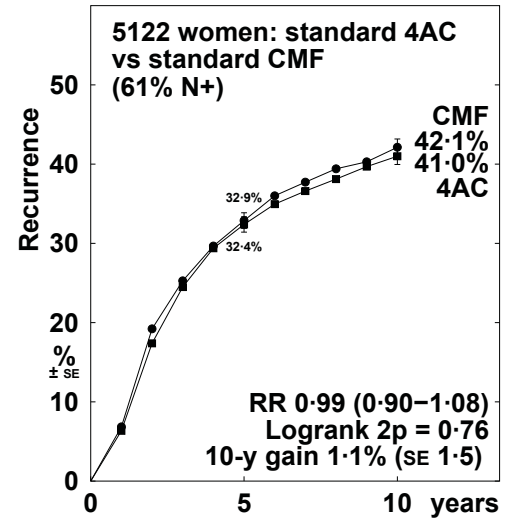

| Years 0 - 4                                                              | Years 5 - 9                                                           | Year 10+                                                             |
|--------------------------------------------------------------------------|-----------------------------------------------------------------------|----------------------------------------------------------------------|
| 7.97 (820 / 10292)<br>8.21 (830 / 10108)<br>0.98 SE 0.05<br>-8.7 / 355.5 | 2.86 (194 / 6795)<br>2.99 (199 / 6658)<br>0.91 SE 0.10<br>-8.5 / 92.1 | 2.36 (100 / 4237)<br>1.87 (76 / 4054)<br>1.28 SE 0.17<br>10.4 / 42.3 |

**Breast cancer mortality**

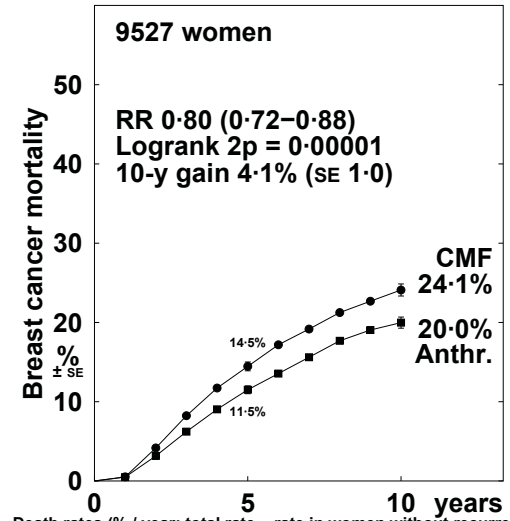

Death rates (% / year: total rate - rate in women without recurrence) and logrank analyses

| Allocation           | Years 0 - 4                   | Years 5 - 9                   | Year 10+                    |
|----------------------|-------------------------------|-------------------------------|-----------------------------|
| Anthr.               | 2.39 SE 0.11                  | 2.08 SE 0.14                  | 0.91 SE 0.14                |
| CMF                  | 3.06 SE 0.12                  | 2.50 SE 0.15                  | 1.11 SE 0.16                |
| Rate ratio (O-E) / V | 0.78 SE 0.06<br>-62.9 / 248.9 | 0.84 SE 0.09<br>-19.3 / 111.5 | 0.84 SE 0.20<br>-3.5 / 20.8 |

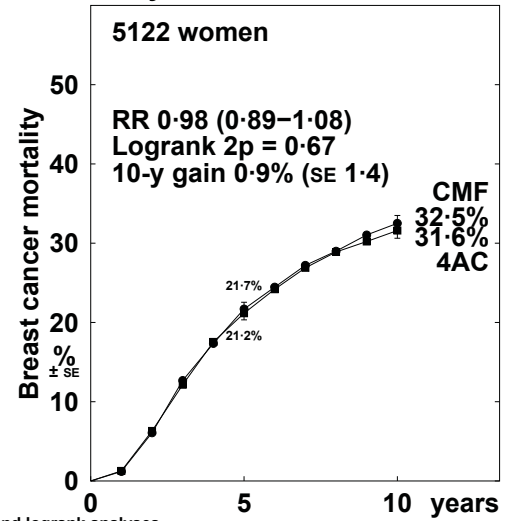

| Years 0 - 4                                                  | Years 5 - 9                                                  | Year 10+                                                   |
|--------------------------------------------------------------|--------------------------------------------------------------|------------------------------------------------------------|
| 4.65 SE 0.20<br>4.81 SE 0.21<br>0.97 SE 0.06<br>-6.3 / 245.2 | 2.94 SE 0.19<br>3.04 SE 0.20<br>0.97 SE 0.09<br>-3.7 / 111.6 | 2.06 SE 0.20<br>1.96 SE 0.20<br>1.03 SE 0.15<br>1.5 / 48.9 |

**Overall mortality**

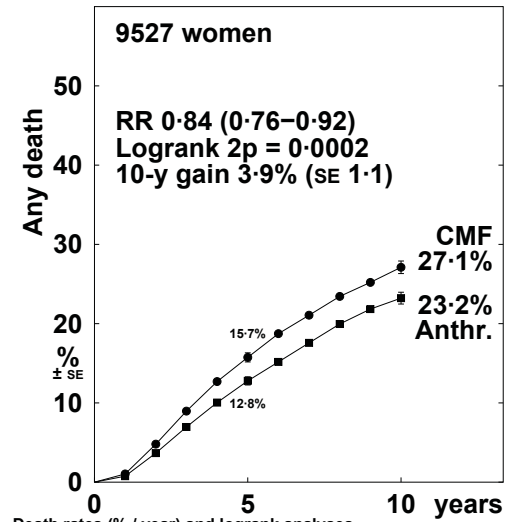

Death rates (% / year) and logrank analyses

| Allocation           | Years 0 - 4                   | Years 5 - 9                   | Year 10+                   |
|----------------------|-------------------------------|-------------------------------|----------------------------|
| Anthr.               | 2.67 (561 / 20977)            | 2.60 (290 / 11151)            | 1.99 (90 / 4528)           |
| CMF                  | 3.36 (669 / 19894)            | 2.99 (319 / 10661)            | 1.92 (87 / 4523)           |
| Rate ratio (O-E) / V | 0.79 SE 0.05<br>-65.0 / 277.4 | 0.88 SE 0.08<br>-17.8 / 137.2 | 1.06 SE 0.16<br>2.5 / 40.9 |

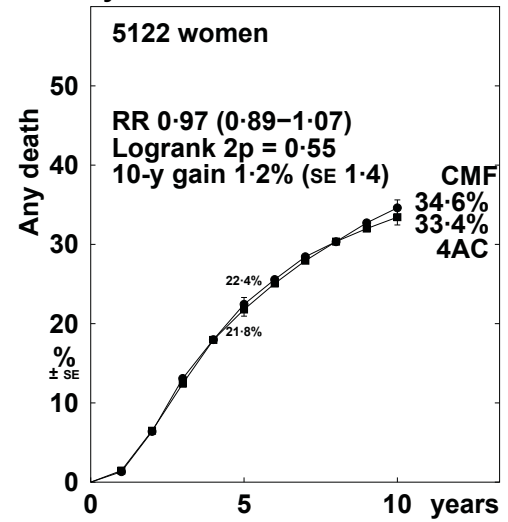

| Years 0 - 4                                                              | Years 5 - 9                                                            | Year 10+                                                             |
|--------------------------------------------------------------------------|------------------------------------------------------------------------|----------------------------------------------------------------------|
| 4.81 (551 / 11458)<br>5.00 (567 / 11351)<br>0.97 SE 0.06<br>-8.1 / 254.9 | 3.33 (266 / 7994)<br>3.48 (274 / 7883)<br>0.96 SE 0.09<br>-5.3 / 127.6 | 2.67 (141 / 5281)<br>2.57 (131 / 5106)<br>1.01 SE 0.13<br>0.8 / 64.2 |

## P 20: Chemotherapy vs no adjuvant chemotherapy (no CTX)

Left:  $\geq 4$  cycles of any anthracycline-based regimen, eg standard 4AC,  
 Right: standard CMF (or near-standard CMF)

Time to recurrence, breast cancer mortality and overall mortality. RR (and its 95% CI): event rate ratio, from summed logrank statistics for all time periods. Gain (and its SE): absolute difference between ends of graphs.

### Recurrence

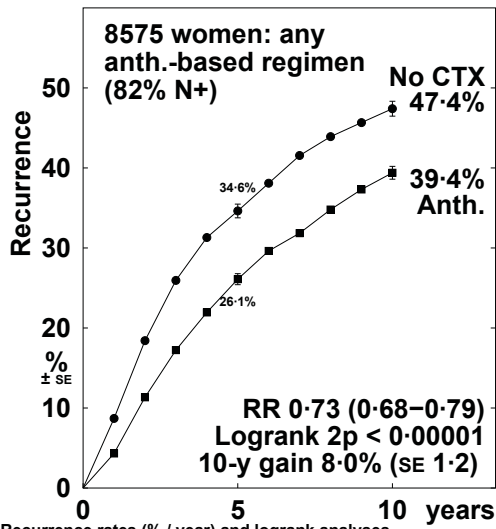

Recurrence rates (% / year) and logrank analyses

| Allocation           | Years 0 - 4                    | Years 5 - 9                   | Year 10+                     |
|----------------------|--------------------------------|-------------------------------|------------------------------|
| Anth.                | 6.14 (1179 / 19190)            | 4.06 (487 / 11981)            | 2.91 (161 / 5530)            |
| No CTX               | 9.06 (1259 / 13899)            | 4.56 (365 / 8011)             | 3.87 (159 / 4104)            |
| Rate ratio (O-E) / V | 0.69 SE 0.04<br>-185.2 / 489.8 | 0.89 SE 0.07<br>-20.0 / 174.7 | 0.72 SE 0.11<br>-21.2 / 65.5 |

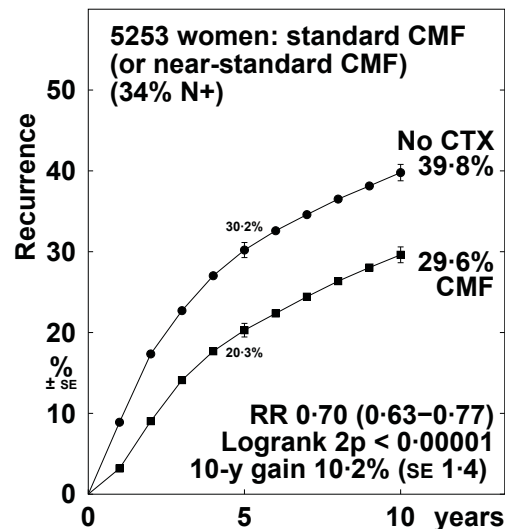

Recurrence rates (% / year) and logrank analyses

| Allocation           | Years 0 - 4                    | Years 5 - 9                  | Year 10+                    |
|----------------------|--------------------------------|------------------------------|-----------------------------|
| CMF                  | 4.83 (549 / 11357)             | 2.58 (207 / 8038)            | 1.88 (116 / 6155)           |
| No CTX               | 7.20 (748 / 10385)             | 2.93 (210 / 7158)            | 1.90 (100 / 5260)           |
| Rate ratio (O-E) / V | 0.61 SE 0.05<br>-135.5 / 277.0 | 0.84 SE 0.09<br>-16.9 / 95.9 | 0.99 SE 0.14<br>-0.7 / 48.7 |

### Breast cancer mortality

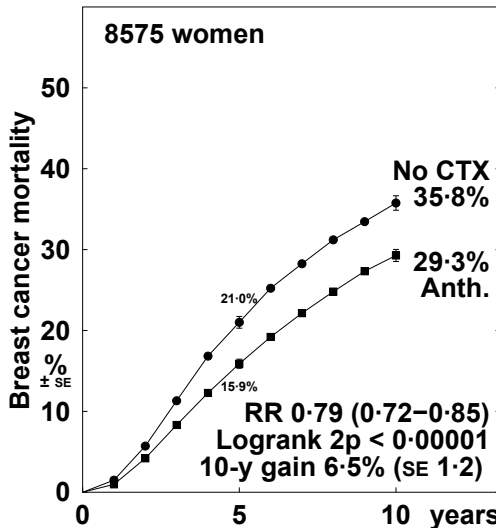

Death rates (% / year: total rate - rate in women without recurrence) and logrank analyses

| Allocation           | Years 0 - 4                   | Years 5 - 9                   | Year 10+                    |
|----------------------|-------------------------------|-------------------------------|-----------------------------|
| Anth.                | 3.38 SE 0.13                  | 3.57 SE 0.16                  | 2.83 SE 0.19                |
| No CTX               | 4.77 SE 0.17                  | 4.31 SE 0.21                  | 2.98 SE 0.22                |
| Rate ratio (O-E) / V | 0.73 SE 0.05<br>-97.5 / 307.0 | 0.83 SE 0.07<br>-35.9 / 193.2 | 0.92 SE 0.11<br>-6.7 / 81.0 |

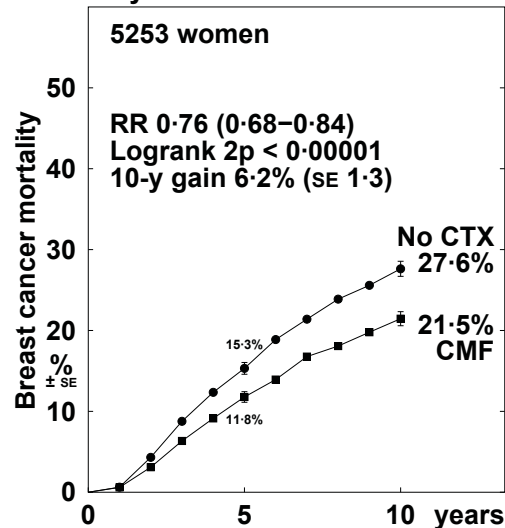

Death rates (% / year: total rate - rate in women without recurrence) and logrank analyses

| Allocation           | Years 0 - 4                   | Years 5 - 9                   | Year 10+                     |
|----------------------|-------------------------------|-------------------------------|------------------------------|
| CMF                  | 2.51 SE 0.14                  | 2.42 SE 0.16                  | 1.80 SE 0.16                 |
| No CTX               | 3.23 SE 0.17                  | 3.14 SE 0.19                  | 2.10 SE 0.18                 |
| Rate ratio (O-E) / V | 0.75 SE 0.07<br>-43.5 / 151.3 | 0.74 SE 0.08<br>-33.7 / 109.6 | 0.82 SE 0.12<br>-11.9 / 59.1 |

### Overall mortality

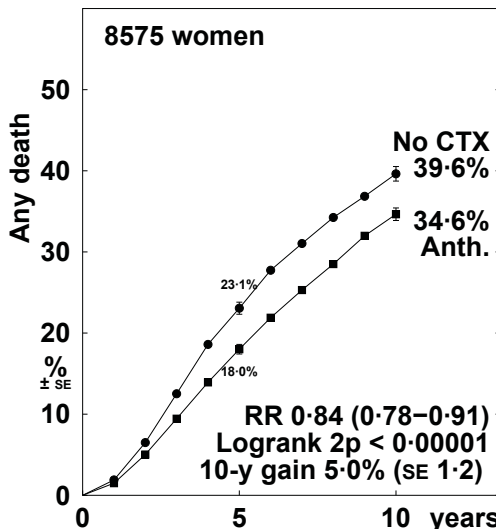

Death rates (% / year) and logrank analyses

| Allocation           | Years 0 - 4                   | Years 5 - 9                   | Year 10+                     |
|----------------------|-------------------------------|-------------------------------|------------------------------|
| Anth.                | 3.91 (811 / 20718)            | 4.62 (645 / 13969)            | 4.39 (337 / 7680)            |
| No CTX               | 5.25 (834 / 15889)            | 4.93 (492 / 9975)             | 4.34 (259 / 5969)            |
| Rate ratio (O-E) / V | 0.75 SE 0.05<br>-99.0 / 346.4 | 0.92 SE 0.06<br>-19.1 / 234.6 | 1.00 SE 0.09<br>-0.1 / 120.2 |

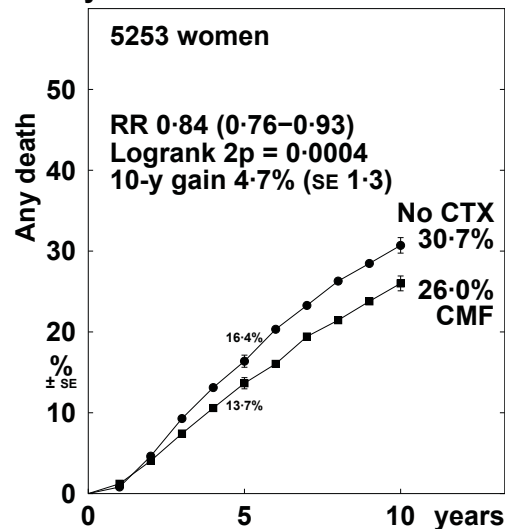

Death rates (% / year) and logrank analyses

| Allocation           | Years 0 - 4                   | Years 5 - 9                   | Year 10+                    |
|----------------------|-------------------------------|-------------------------------|-----------------------------|
| CMF                  | 2.93 (357 / 12167)            | 3.15 (286 / 9091)             | 3.14 (230 / 7318)           |
| No CTX               | 3.49 (410 / 11756)            | 3.78 (326 / 8617)             | 3.39 (224 / 6612)           |
| Rate ratio (O-E) / V | 0.82 SE 0.07<br>-33.6 / 170.7 | 0.81 SE 0.08<br>-28.5 / 137.2 | 0.91 SE 0.10<br>-8.8 / 96.2 |

# P 21: EARLY RECURRENCE (first 5 years) in trials of taxane-plus-anthracycline-based regimen vs SAME, or MORE (< doubled or ~doubled) non-taxane cytotoxic chemotherapy

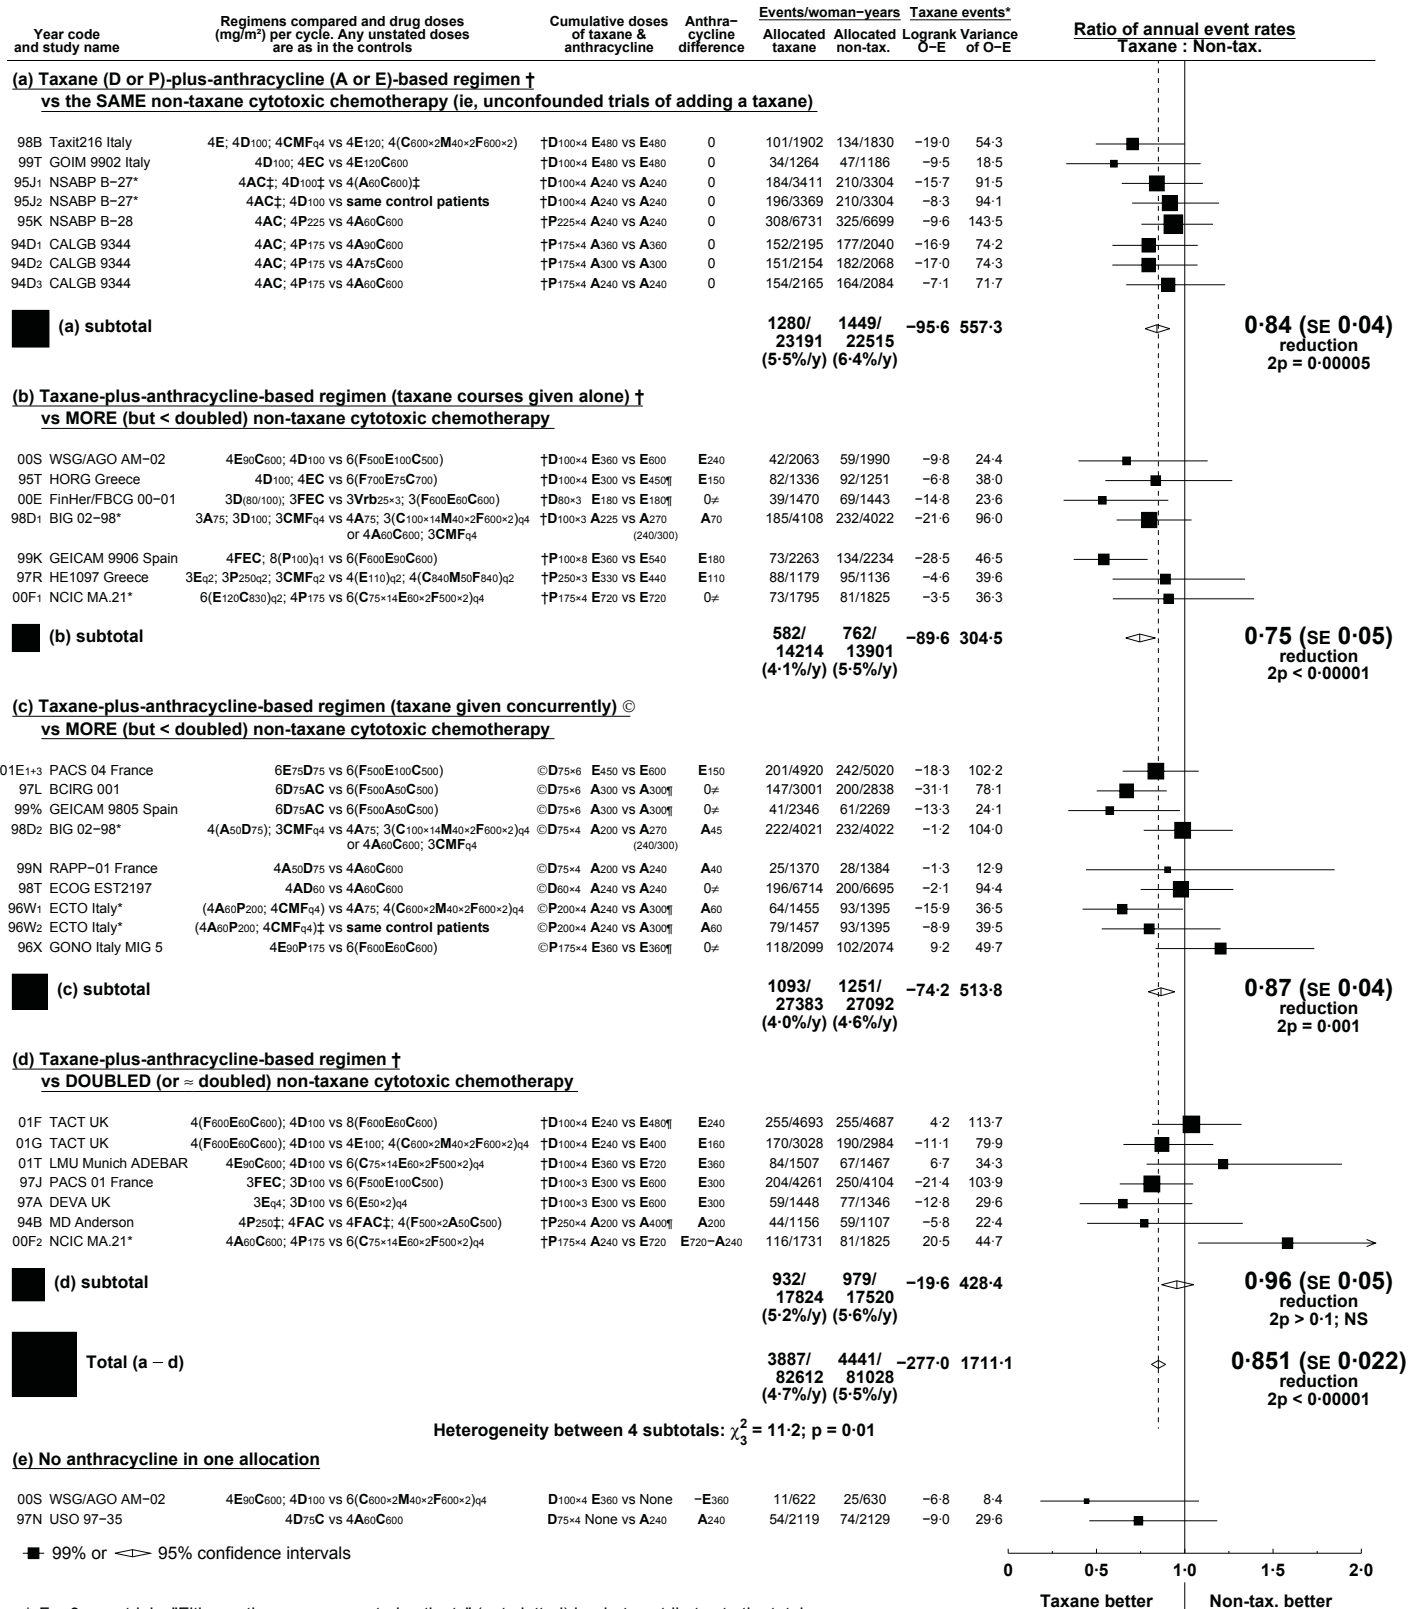

\* For 3-way trials, "Either active vs same control patients" (not plotted) is what contributes to the total.

For 95J NSABP B-27, this (O-E) is -16.5 with variance V = 120.8; 96W ECTO Italy (O-E) = -16.1, V = 48.4;

98D BIG 02-98 (O-E) = -15.0, V = 131.9; 00F MA.21 (O-E) = 11.2; V = 56.3

† Taxane courses do not overlap with any other chemotherapy courses; hence, total chemotherapy duration is increased

‡ Pre-operative chemotherapy: all patients in these trials were analysed as unknown nodal status

© Concurrent treatment with taxane and anthracycline; total chemotherapy duration and number of courses not increased

‡ Same cumulative anthracycline dose, but differences in other drugs

¶ Control anthracycline dose less than E90 or A60 per cycle

Taxanes: D = docetaxel; P = paclitaxel. Anthracyclines: A = doxorubicin (Adriamycin); E = Epirubicin  
Other agents: C = cyclophosphamide; F = fluorouracil; M = methotrexate; V = vincristine; Vrb = vinorelbine  
(Not shown: G-CSF, erythropoietin, trastuzumab, antibiotic, hormonal, local or steroid therapies)

All regimens q3week (unless specified as q1, q2 or q4). Semicolon ; indicates treatment sequence.

x14 means d1-14 po; x2 (x3) means d1, d8 (d15) iv (except that in trial 94B, F500x2 was d1, d4 iv and in trial 01F, C600x2 could be C100x14).



# P 23: Breast cancer mortality (mortality with recurrence, by logrank subtraction), any taxane-plus-anthracycline-based regimen vs control with the SAME, or MORE (<doubled or ~doubled) non-taxane cytotoxic chemotherapy

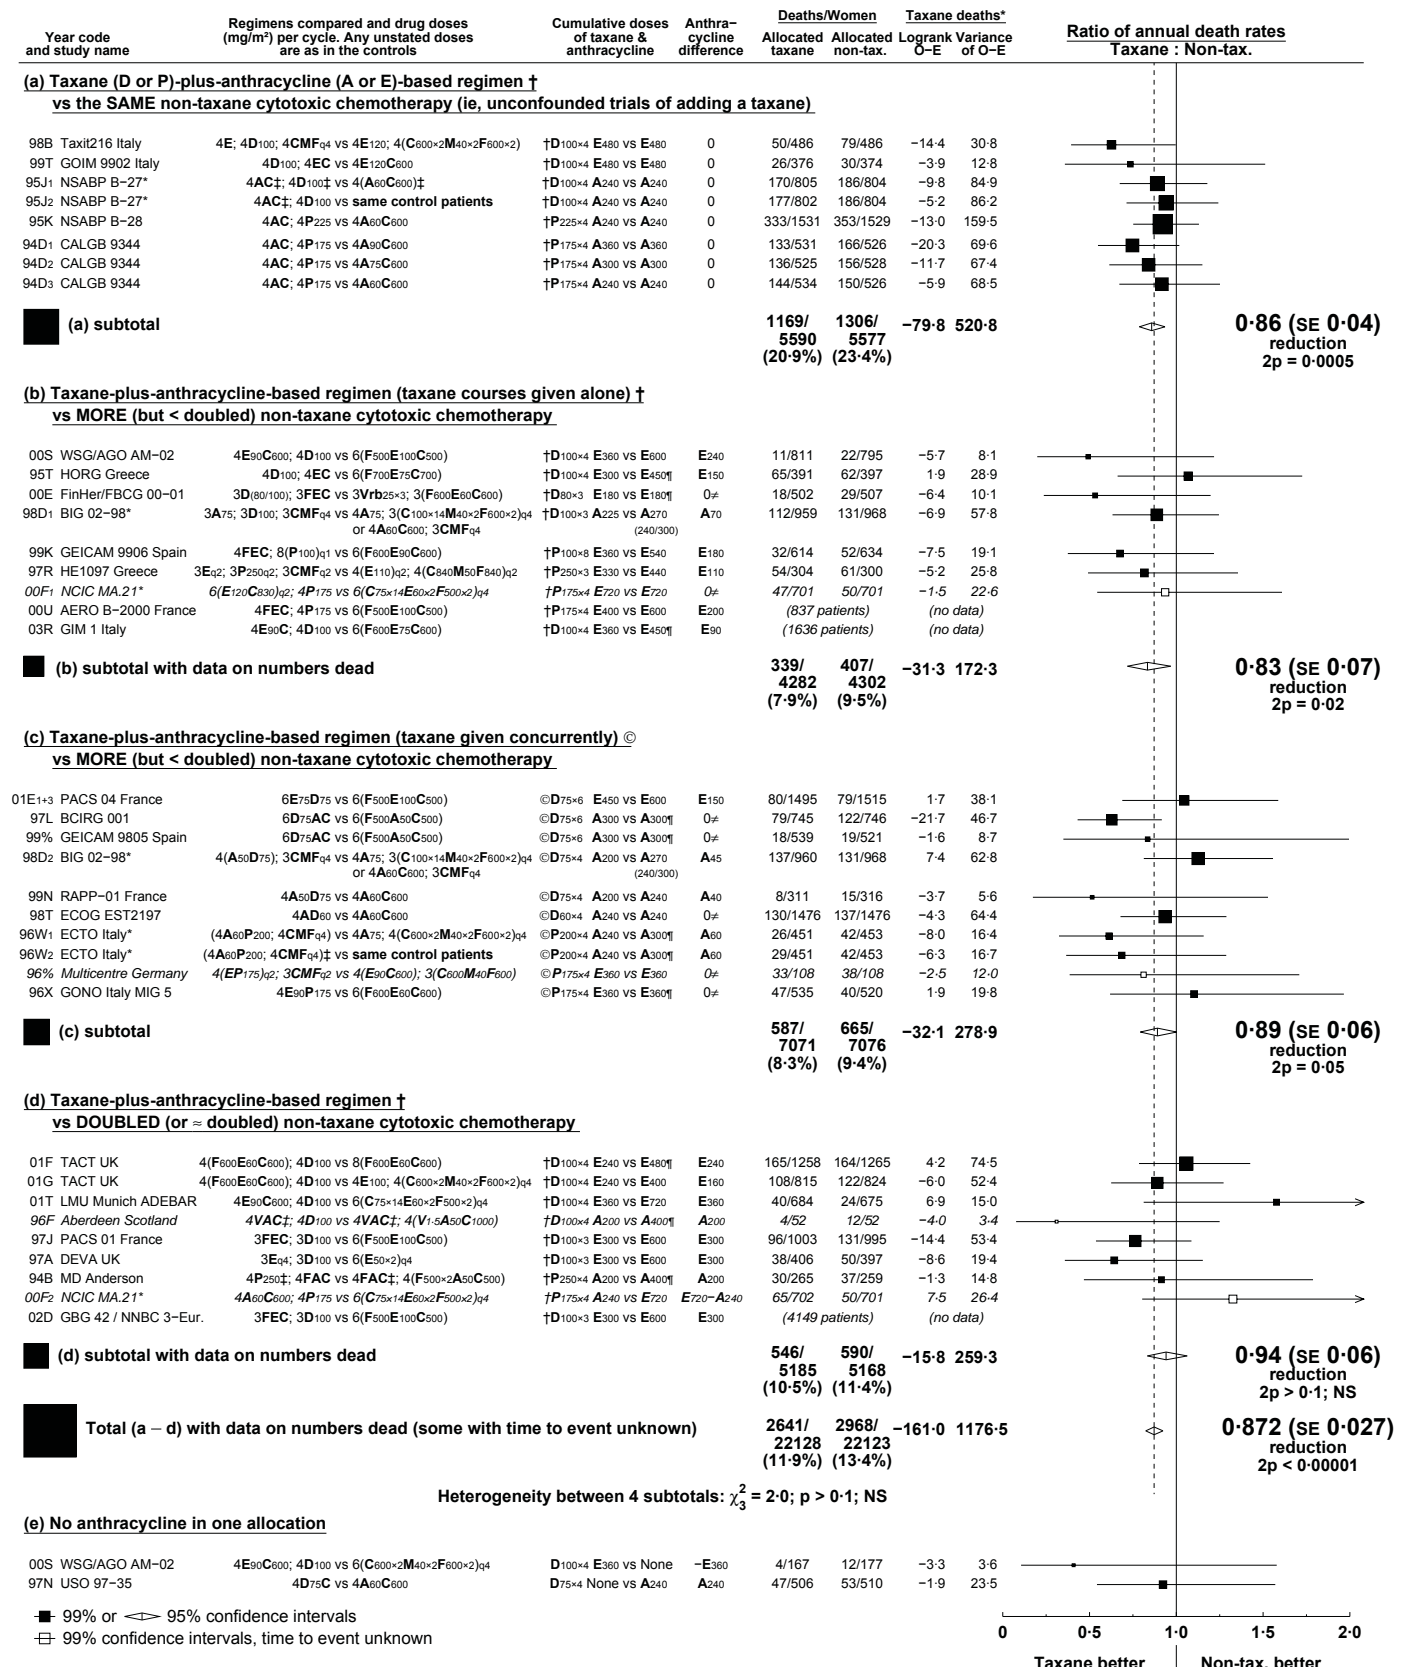

\* For 3-way trials, "Either active vs same control patients" (not plotted) is what contributes to the total.  
 † For 95J NSABP B-27, this (O-E) is -10.5 with variance V = 112.2; 96W ECTO Italy (O-E) = -9.3, V = 20.8; 98D BIG 02-98 (O-E) = 0.4, V = 81.5; 00F MA.21 (O-E) = 4.0; V = 33.2  
 ‡ Taxane courses do not overlap with any other chemotherapy courses; hence, total chemotherapy duration is increased  
 § Pre-operative chemotherapy: all patients in these trials were analysed as unknown nodal status  
 © Concurrent treatment with taxane and anthracycline; total chemotherapy duration and number of courses not increased  
 # Same cumulative anthracycline dose, but differences in other drugs  
 ¶ Control anthracycline dose less than E90 or A60 per cycle

Taxanes: D = docetaxel; P = paclitaxel. Anthracyclines: A = doxorubicin (Adriamycin); E = Epirubicin  
 Other agents: C = cyclophosphamide; F = fluorouracil; M = methotrexate; V = vincristine; Vrb = vinorelbine  
 (Not shown: G-CSF, erythropoietin, trastuzumab, antibiotic, hormonal, local or steroid therapies)  
 All regimens q3week (unless specified as q1, q2 or q4). Semicolon [;] indicates treatment sequence.  
 ×14 means d1-14 po; ×2 (×3) means d1, d8 (d15) iv (except that in trial 94B, F500x2 was d1, d4 iv and in trial 01F, C600x2 could be C100x14).



# P 24: MORTALITY WITHOUT RECURRENCE IN FIRST YEAR in trials of taxane-plus-anthracycline-based regimen vs SAME, or MORE (< doubled or ~doubled) non-taxane cytotoxic chemotherapy

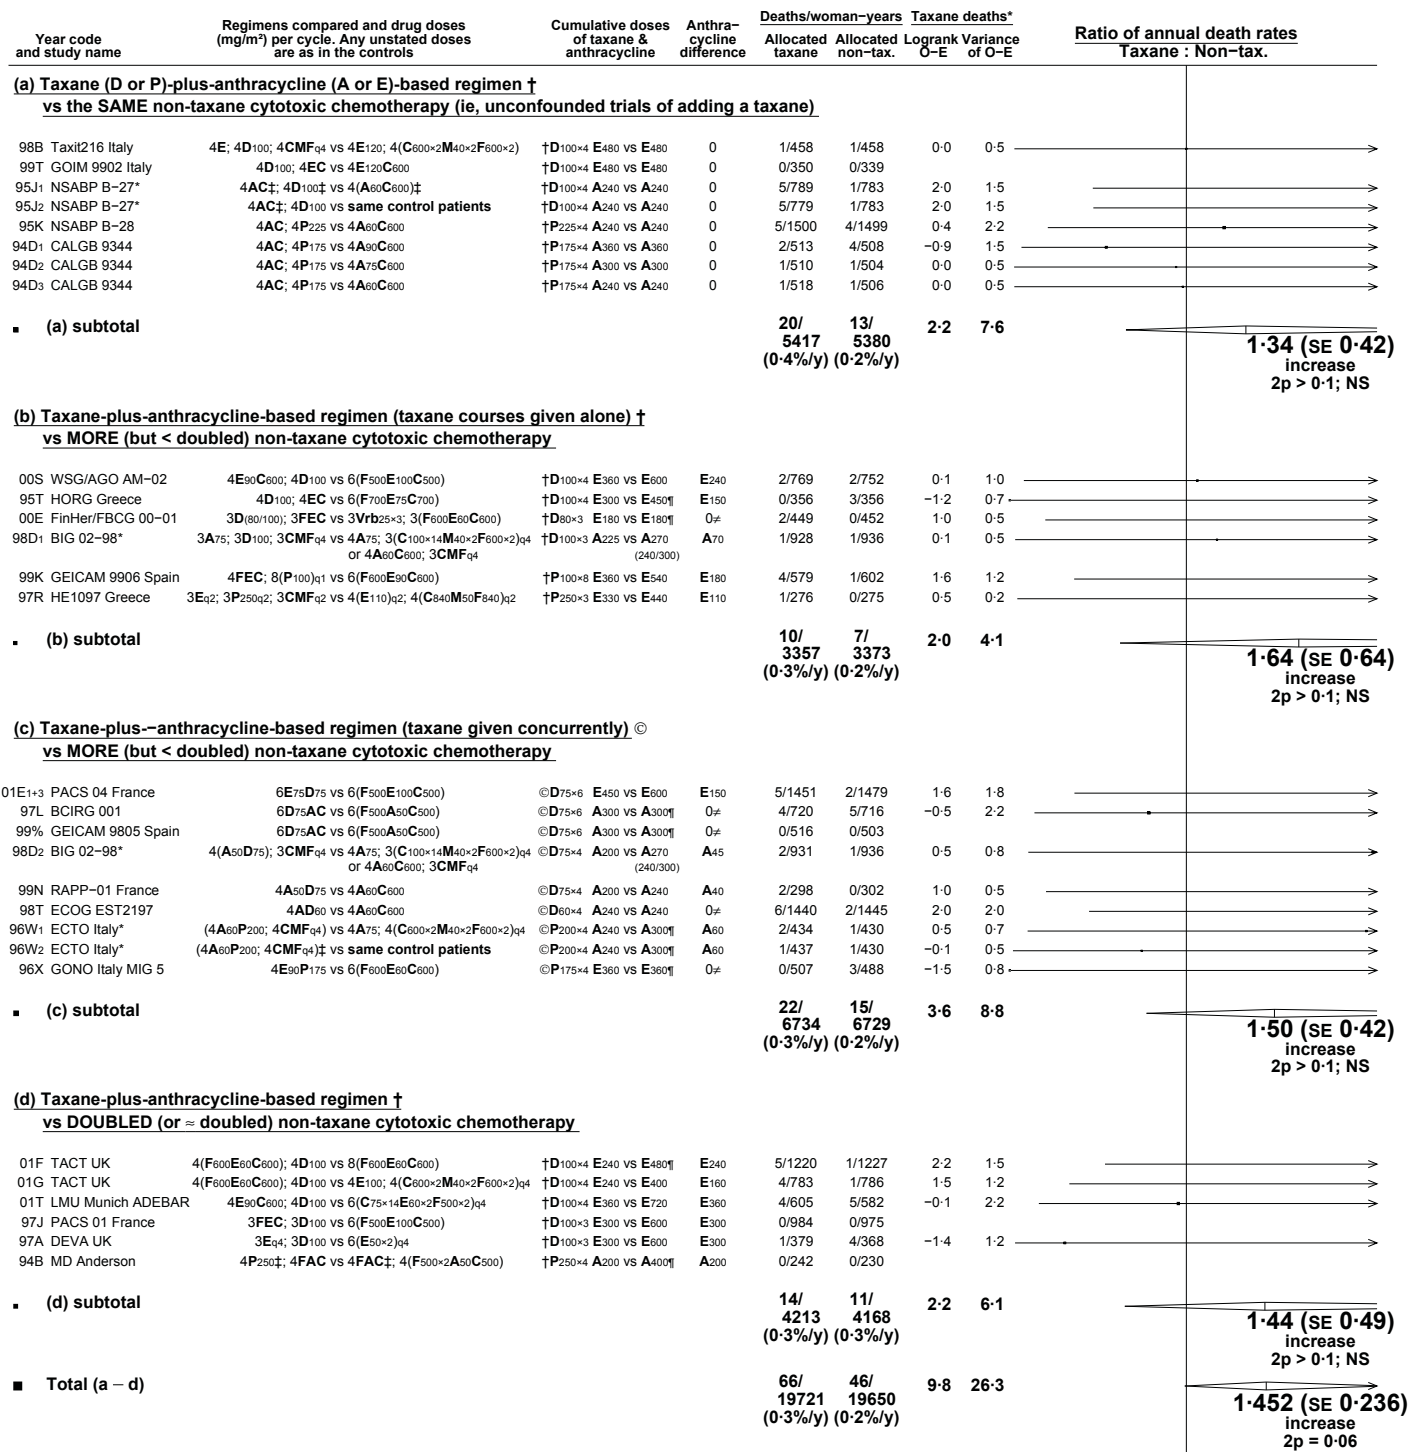

Heterogeneity between 4 subtotals:  $\chi^2_3 = 0.1$ ;  $p > 0.1$ ; NS

## (e) No anthracycline in one allocation

|                   |                                           |                     |       |       |       |     |     |  |  |  |
|-------------------|-------------------------------------------|---------------------|-------|-------|-------|-----|-----|--|--|--|
| 00S WSG/AGO AM-02 | 4E90C600; 4D100 vs 6(C600x2M40x2F600x2)q4 | D100x4 E360 vs None | -E360 | 0/154 | 0/164 |     |     |  |  |  |
| 97N USO 97-35     | 4D75C vs 4A60C600                         | D75x4 None vs A240  | A240  | 3/482 | 1/487 | 0.9 | 1.0 |  |  |  |

■ 99% or ◁ 95% confidence intervals

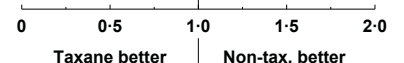

\* For 3-way trials, "Either active vs same control patients" (not plotted) is what contributes to the total.

For 95J NSABP B-27, this (O-E) is 2.7 with variance  $V = 2.4$ ; 96W ECTO Italy (O-E) = 0.3,  $V = 0.9$ ;

98D BIG 02-98 (O-E) = 0.4,  $V = 0.9$ ; 00F MA.21 (O-E) = 0.0;  $V = 0.0$

† Taxane courses do not overlap with any other chemotherapy courses; hence, total chemotherapy duration is increased

‡ Pre-operative chemotherapy: all patients in these trials were analysed as unknown nodal status

© Concurrent treatment with taxane and anthracycline; total chemotherapy duration and number of courses not increased

≠ Same cumulative anthracycline dose, but differences in other drugs

¶ Control anthracycline dose less than E90 or A60 per cycle

Taxanes: D = docetaxel; P = paclitaxel. Anthracyclines: A = doxorubicin (Adriamycin); E = Epirubicin

Other agents: C = cyclophosphamide; F = fluorouracil; M = methotrexate; V = vincristine; Vrb = vinorelbine

(Not shown: G-CSF, erythropoietin, trastuzumab, antibiotic, hormonal, local or steroid therapies)

All regimens q3week (unless specified as q1, q2 or q4). Semicolon [;] indicates treatment sequence.

x14 means d1-14 po; x2 (x3) means d1, d8 (d15) iv (except that in trial 94B, F500x2 was d1, d4 iv and in trial 01F, C600x2 could be C100x14).

# P 25: MORTALITY WITHOUT RECURRENCE in trials of taxane-plus-anthracycline-based regimen vs SAME, or MORE (< doubled or ~doubled) non-taxane cytotoxic chemotherapy

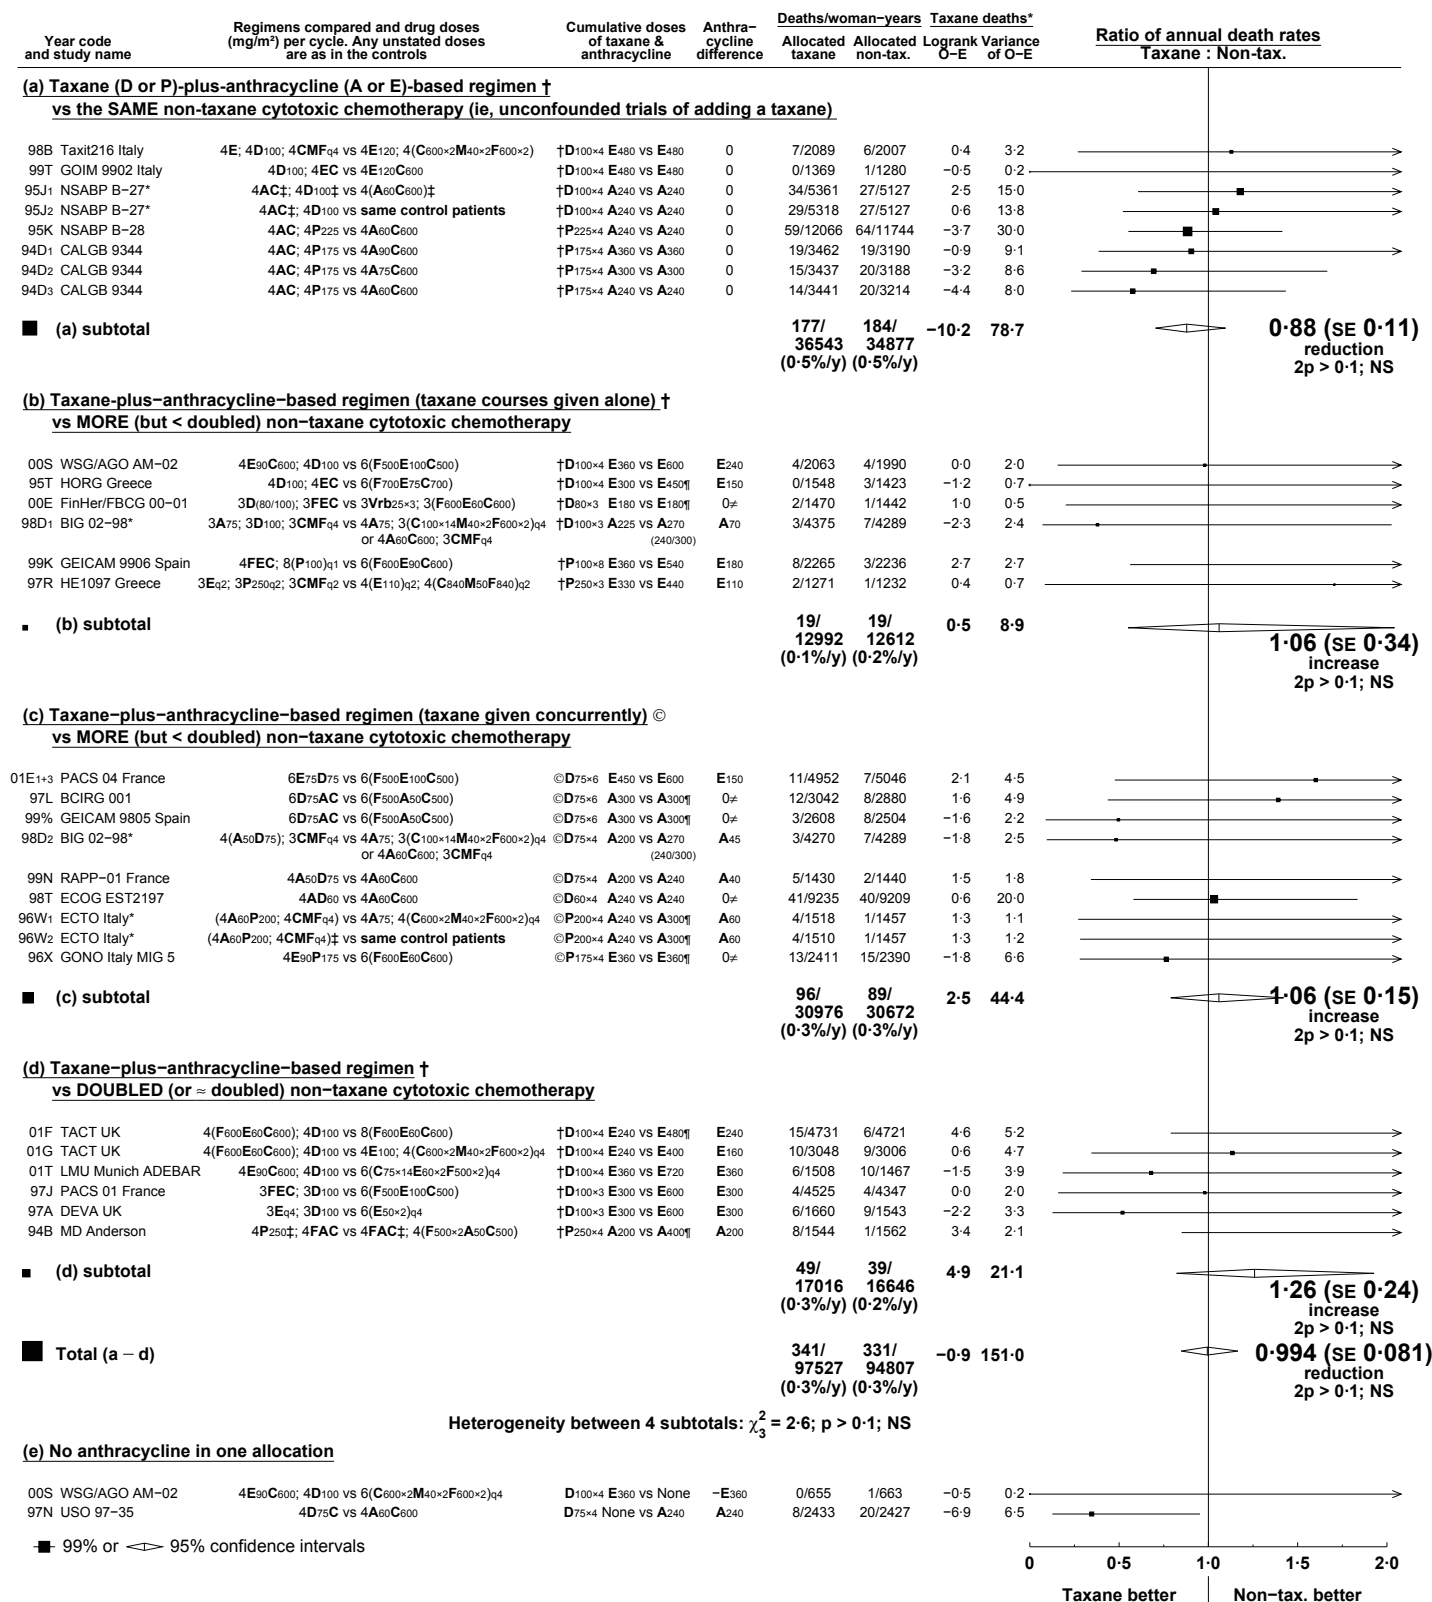

\* For 3-way trials, "Either active vs same control patients" (not plotted) is what contributes to the total.  
 For 95J NSABP B-27, this (O-E) is 2.1 with variance V = 19.5; 96W ECTO Italy (O-E) = 1.8, V = 1.9;  
 98D BIG 02-98 (O-E) = -2.8, V = 2.8; 00F MA.21 (O-E) = 0.0; V = 0.0

† Taxane courses do not overlap with any other chemotherapy courses; hence, total chemotherapy duration is increased

‡ Pre-operative chemotherapy: all patients in these trials were analysed as unknown nodal status

© Concurrent treatment with taxane and anthracycline; total chemotherapy duration and number of courses not increased

≠ Same cumulative anthracycline dose, but differences in other drugs

¶ Control anthracycline dose less than E90 or A60 per cycle

Taxanes: D = docetaxel; P = paclitaxel. Anthracyclines: A = doxorubicin (Adriamycin); E = Epirubicin  
 Other agents: C = cyclophosphamide; F = fluorouracil; M = methotrexate; V = vincristine; Vrb = vinorelbine  
 (Not shown: G-CSF, erythropoietin, trastuzumab, antibiotic, hormonal, local or steroid therapies)

All regimens q3week (unless specified as q1, q2 or q4). Semicolon [;] indicates treatment sequence.

\*14 means d1-14 po; \*2 (\*3) means d1, d8 (d15) iv (except that in trial 94B, F500x2 was d1, d4 iv and in trial 01F, C600x2 could be C100x14).

# P 26: OVERALL MORTALITY in trials of taxane-plus-anthracycline-based regimen vs SAME, or MORE (< doubled or ~doubled) non-taxane cytotoxic chemotherapy

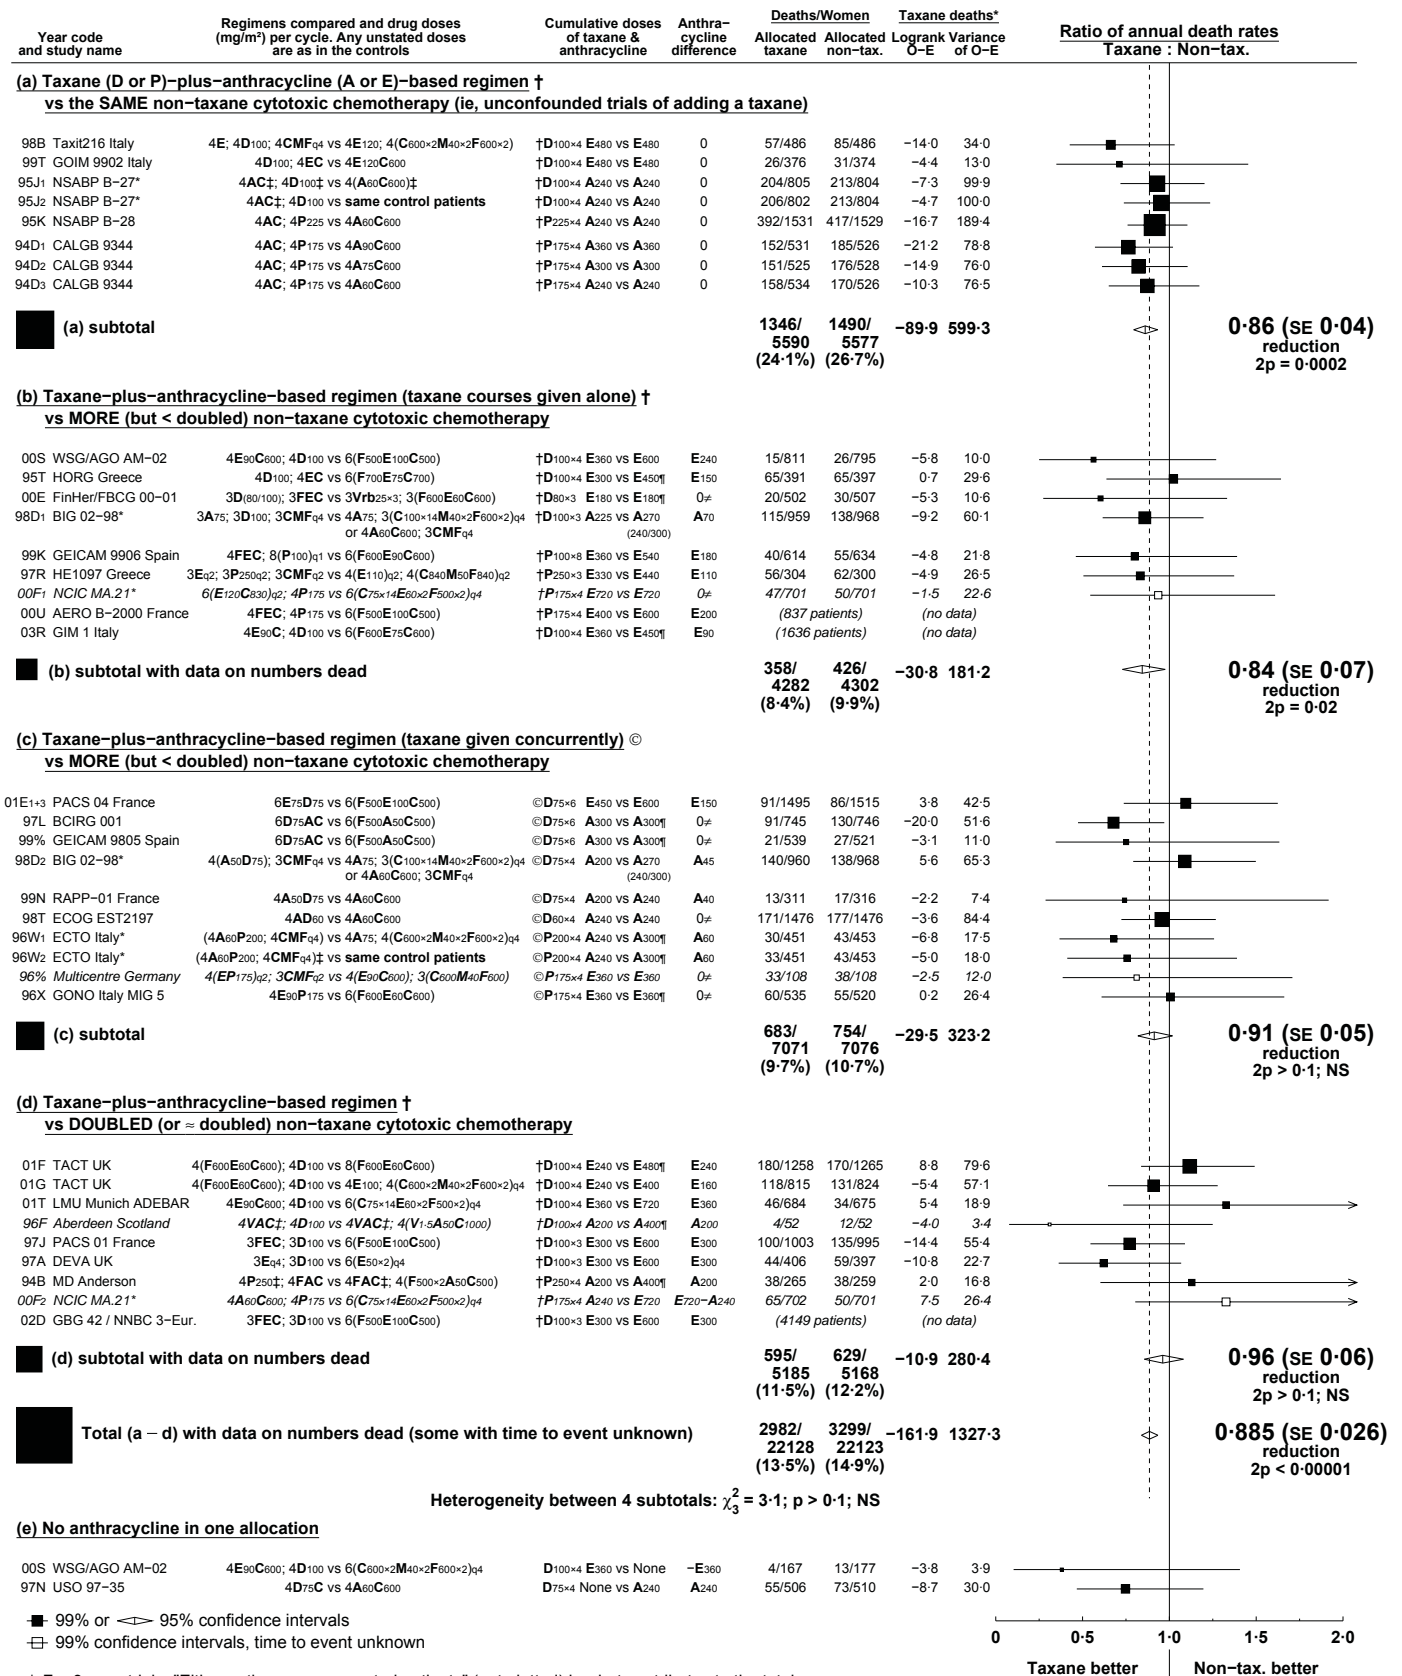

\* For 3-way trials, "Either active vs same control patients" (not plotted) is what contributes to the total.  
 † For 95J NSABP B-27, this (O-E) is -8.4 with variance V = 131.6; 96W ECTO Italy (O-E) = -7.5, V = 22.7; 98D BIG 02-98 (O-E) = -2.3, V = 84.2; 00F MA.21 (O-E) = 4.0; V = 33.2  
 ‡ Taxane courses do not overlap with any other chemotherapy courses; hence, total chemotherapy duration is increased  
 § Pre-operative chemotherapy; all patients in these trials were analysed as unknown nodal status  
 © Concurrent treatment with taxane and anthracycline; total chemotherapy duration and number of courses not increased  
 ≠ Same cumulative anthracycline dose, but differences in other drugs  
 ¶ Control anthracycline dose less than E90 or A60 per cycle  
 Taxanes: D = docetaxel; P = paclitaxel. Anthracyclines: A = doxorubicin (Adriamycin); E = Epirubicin  
 Other agents: C = cyclophosphamide; F = fluorouracil; M = methotrexate; V = vincristine; Vrb = vinorelbine  
 (Not shown: G-CSF, erythropoietin, trastuzumab, antibiotic, hormonal, local or steroid therapies)  
 All regimens q3week (unless specified as q1, q2 or q4). Semicolon ; indicates treatment sequence.  
 ×14 means d1-14 po; ×2 (×3) means d1, d8 (d15) iv (except that in trial 94B, F500×2 was d1, d4 iv and in trial 01F, C600×2 could be C100×14).

# P 27: EARLY RECURRENCE (first 5 years) in trials of any anthracycline-based regimen vs. standard CMF (or near-standard CMF)

| Year code and study name                                    | Regimens compared and drug doses (mg/m <sup>2</sup> ) per cycle | Cumulative dosage, E/A | Events/woman-years         |                            | Anthr. events O-E | Variance of O-E | Ratio of annual event rates Anthr. : CMF        |
|-------------------------------------------------------------|-----------------------------------------------------------------|------------------------|----------------------------|----------------------------|-------------------|-----------------|-------------------------------------------------|
|                                                             |                                                                 |                        | Allocated anthr.           | Adjusted CMF               |                   |                 |                                                 |
| <b>(a) Anthracycline dose/cycle ≥ A60 or E90</b>            |                                                                 |                        |                            |                            |                   |                 |                                                 |
| <b>i. Cumulative anthracycline dosage A360 or E720-800</b>  |                                                                 |                        |                            |                            |                   |                 |                                                 |
| 88R Brussels Belgium                                        | 8E100C830 vs 6(C100×14M40×2F600×2)q4                            | E800                   | 64/1131                    | 82/1073                    | -11.5             | 31.6            |                                                 |
| 89R NCIC MA.5                                               | 6(C75×14E60×2F500×2)q4 vs 6(C100×14M40×2F600×2)q4               | E720                   | 135/1373                   | 168/1278                   | -19.8             | 65.2            |                                                 |
| 89Bz SWOG 8897                                              | 6(C100×14A30×2F500×2)q4 vs 6(C100×14M40×2F600×2)q4              | A360                   | 182/6725                   | 223/6687                   | -19.6             | 97.5            |                                                 |
| <b>Subtotal i</b>                                           |                                                                 |                        | <b>381/9229 (4.1%/y)</b>   | <b>473/9038 (5.2%/y)</b>   | <b>-50.9</b>      | <b>194.3</b>    | <b>0.77 (SE 0.06) reduction 2p = 0.0003</b>     |
| <b>ii. Cumulative anthracycline dosage A300 or E400-480</b> |                                                                 |                        |                            |                            |                   |                 |                                                 |
| 86S GOCCNE Italy                                            | 4E120C600 vs 6(C100×14M40×2F600×2)q4                            | E480                   | 47/363                     | 54/334                     | -3.7              | 20.6            |                                                 |
| 97G FM Italy GMB1                                           | 4E120; 4CMFq4 vs 6(C600×2M40×2F600×2)q4                         | E480                   | 36/940                     | 45/925                     | -3.2              | 18.8            |                                                 |
| 90Z GOIRC SANG 2 Italy                                      | 16(E30)q1 vs 6(C600×2M40×2F600×2)q4                             | E480                   | 47/688                     | 51/740                     | -1.2              | 21.2            |                                                 |
| 84K1 GUN-3 Naples                                           | 3(CMFq4; [E75×2V1.4×2]q3) vs 6(C100×14M40×2F600×2)q4            | E450                   | 57/320                     | 60/360                     | 3.6               | 21.4            |                                                 |
| 96N GOCSI MAM2 Italy                                        | 4E110; 4CMFq4 vs 6(C600×2M40×2F600×2)q4                         | E440                   | 91/2019                    | 85/2030                    | 1.9               | 40.2            |                                                 |
| 96A NEAT, UK                                                | 4E100; 4CMFq4 vs 6(C100×14M40×2F600×2)q4                        | E400                   | 188/3481                   | 225/3316                   | -20.6             | 91.8            |                                                 |
| 97U1+2 IBIS 03 Italy *                                      | 4E100; 4CMFq4 vs 6(C600×2M40×2F600×2)q4                         | E400                   | 76/1682                    | 2(38/795)                  | -0.5              | 23.0            |                                                 |
| 91Q GOCSI MAM1 Italy                                        | 4A75; 6CMFq4 vs 6(C100×14M40×2F600×2)q4                         | A300                   | 66/701                     | 73/702                     | -0.3              | 25.8            |                                                 |
| <b>Subtotal ii</b>                                          |                                                                 |                        | <b>608/10194 (6.0%/y)</b>  | <b>669/9997 (6.7%/y)</b>   | <b>-24.0</b>      | <b>262.7</b>    |                                                 |
| <b>iii. Cumulative anthracycline dosage A240</b>            |                                                                 |                        |                            |                            |                   |                 |                                                 |
| 84B1 NSABP B-15                                             | 4A60C600 vs 6(C100×14M40×2F600×2)q4                             | A240                   | 350/2843                   | 347/2799                   | 0.4               | 146.4           |                                                 |
| 84B2 NSABP B-15                                             | 4(A60C600)q3; 3CMFq4 vs 6(C100×14M40×2F600×2)q4                 | A240                   | 326/2907                   | 347/2799                   | -13.3             | 141.7           |                                                 |
| 91H NSABP B-23                                              | 4A60C600 vs 6(C100×14M40×2F600×2)q4                             | A240                   | 144/4524                   | 136/4492                   | 4.2               | 67.3            |                                                 |
| <b>Subtotal iii</b>                                         |                                                                 |                        | <b>820/10274 (8.0%/y)</b>  | <b>830/10090 (8.2%/y)</b>  | <b>-8.7</b>       | <b>355.5</b>    | <b>0.98 (SE 0.05) reduction 2p &gt; 0.1; NS</b> |
| <b>Subtotal (i + ii + iii)</b>                              |                                                                 |                        | <b>1809/29697 (6.1%/y)</b> | <b>1972/29125 (6.8%/y)</b> | <b>-83.6</b>      | <b>812.5</b>    | <b>0.90 (SE 0.03) reduction 2p = 0.003</b>      |
| Trend between 3 subtotals: $\chi^2_1 = 6.7$ ; $2p = 0.010$  |                                                                 |                        |                            |                            |                   |                 |                                                 |
| <b>(b) Anthracycline dose/cycle &lt; A60 or E90</b>         |                                                                 |                        |                            |                            |                   |                 |                                                 |
| 78L2 ONCOFRANCE                                             | 12(F400×4A30C300×4V1)q4 vs 12(C100×14M40×2F600×2)q4             | A360¶                  | 48/537                     | 54/385                     | -11.5             | 21.4            |                                                 |
| 88R Brussels Belgium                                        | 8E60C500 vs 6(C100×14M40×2F600×2)q4                             | E480¶                  | 94/1064                    | 82/1073                    | 4.4               | 35.7            |                                                 |
| 94J1+2+3 GOIRC SANG 2B R1                                   | 6(C§M§F§V1.4E40×2)q4 vs 6(C600×2M40×2F600×2)q4                  | E480¶                  | 40/1105                    | 38/1092                    | 0.0               | 17.6            |                                                 |
| 84L ICCG C/2/84 UK                                          | 8(FE50C)q4 vs 8(C600×2M40×2F600×2)q4                            | E400¶                  | 136/1465                   | 142/1403                   | -7.0              | 61.3            |                                                 |
| 80C1 SE Sweden BCG A                                        | 8A40C200×4 vs 8(C100×14M40×2F600×2)q4                           | A320¶                  | 7/77                       | 8/79                       | 0.6               | 2.2             |                                                 |
| 84N ICCG C/6/89 UK                                          | 6FE50Cq4 vs 6(C600×2M40×2F600×2)q4                              | E300¶                  | 73/1946                    | 65/1989                    | 3.6               | 32.8            |                                                 |
| <b>(b) subtotal</b>                                         |                                                                 |                        | <b>398/6194 (6.4%/y)</b>   | <b>389/6021 (6.5%/y)</b>   | <b>-10.0</b>      | <b>170.9</b>    |                                                 |
| <b>Total (a + b)</b>                                        |                                                                 |                        | <b>2207/35891 (6.1%/y)</b> | <b>2361/35146 (6.7%/y)</b> | <b>-93.6</b>      | <b>983.5</b>    | <b>0.909 (SE 0.030) reduction 2p = 0.003</b>    |

■ 99% or ◊ 95% confidence intervals

Heterogeneity between 4 subtotals:  $\chi^2_3 = 7.4$ ;  $p = 0.06$

Heterogeneity within subtotals:  $\chi^2_{16} = 13.9$ ;  $p > 0.1$ ; NS

Heterogeneity between 20 trials:  $\chi^2_{19} = 21.3$ ;  $p > 0.1$ ; NS

\* 97U was (4E; 4CMF) vs (4CMF; 4E) vs (6CMF), and its controls count twice in subtotal and in total of events/woman-years; the study included women with highly proliferative disease, and slightly updated results from it have recently been published (webappendix p66)

Anthracyclines: A = doxorubicin (Adriamycin); E = Epirubicin

Other agents: C = cyclophosphamide; F = fluorouracil; M = methotrexate; V = vincristine

(Not shown: antibiotic, hormonal, local or steroid therapies)

All regimens q3week (unless specified as q4). Semicolon [;] indicates treatment sequence

×2 means d1,8 iv; ×4 means d3-6 iv

¶ Dose less than E90 or A60 per cycle of anthracycline

§ 94J interwoven drug schedule: anthracycline group omitted C, M or F respectively on cycles (3, 2 or 1) and (6, 5 or 4)

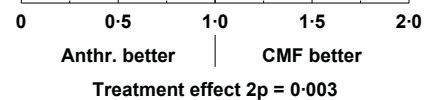

# P 28: RECURRENCE in trials of any anthracycline-based regimen vs. standard CMF (or near-standard CMF)

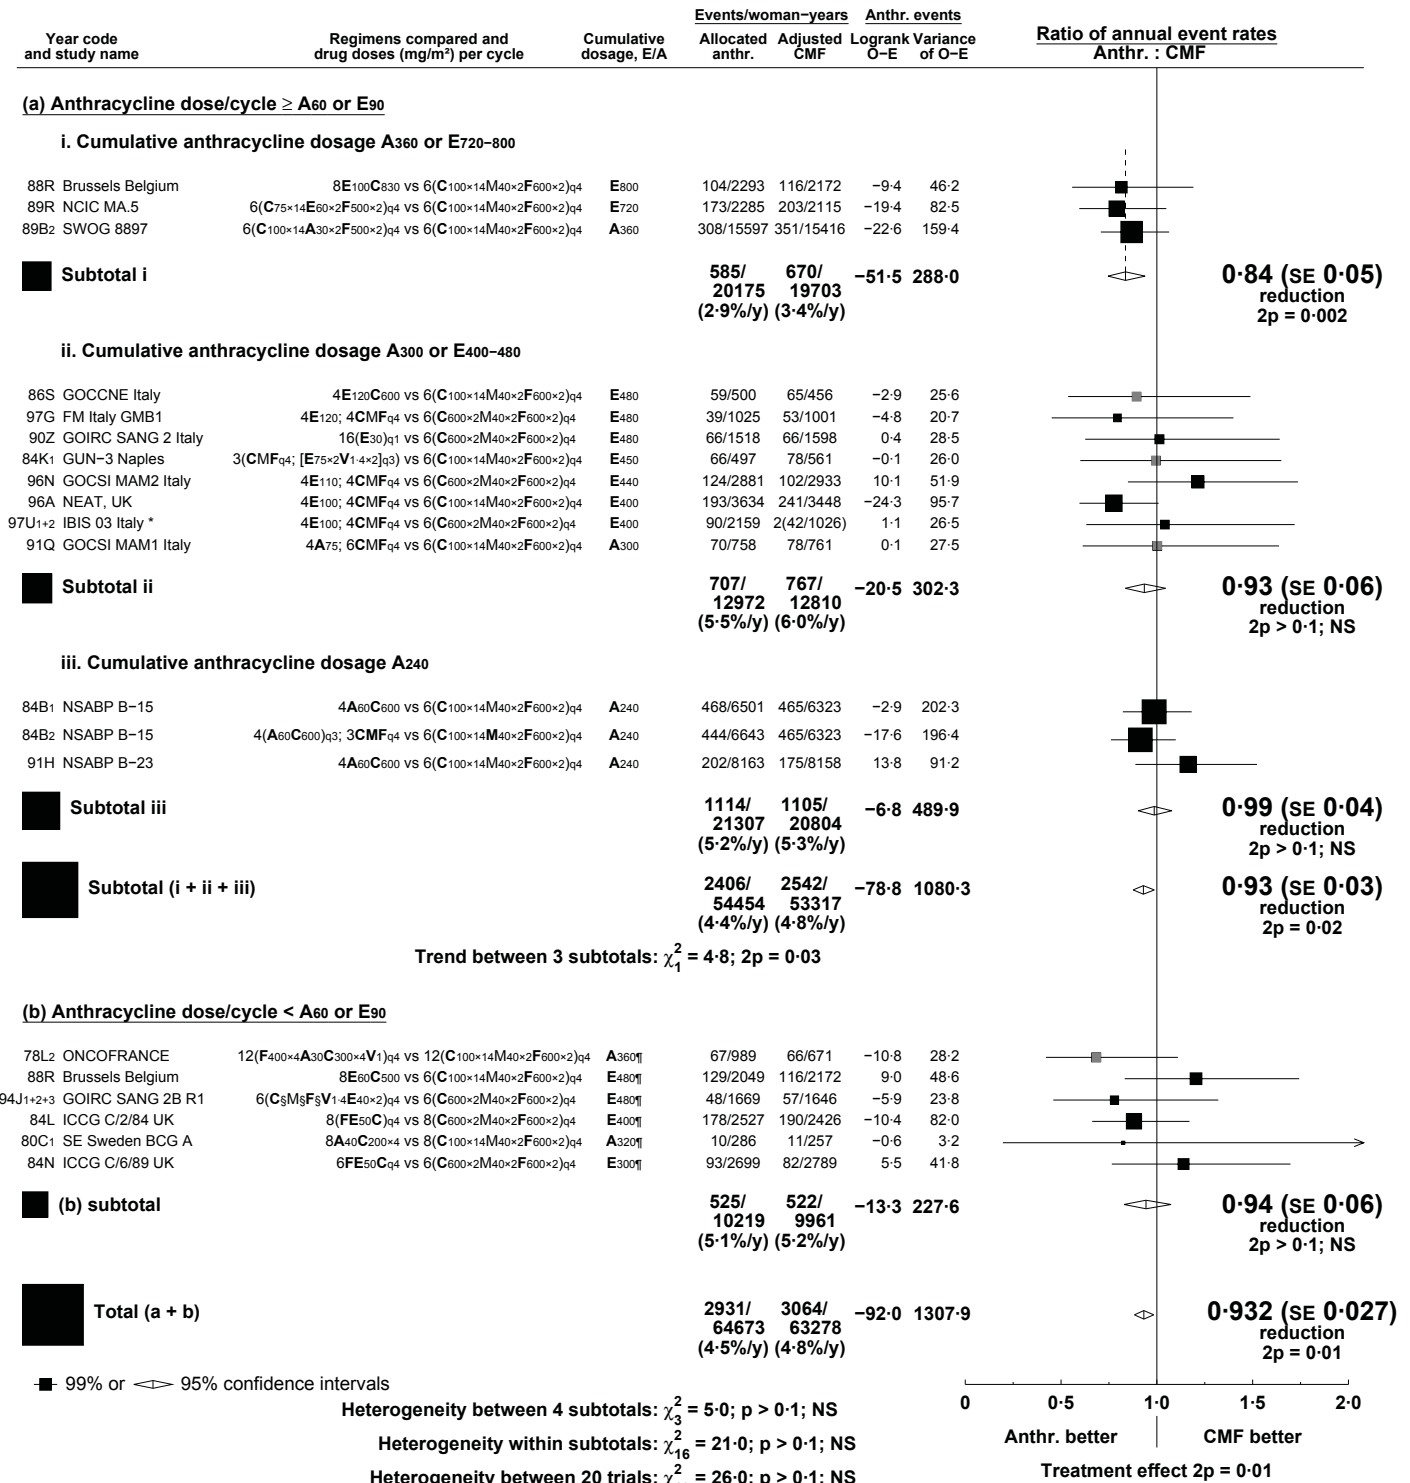

■ 99% or ◊ 95% confidence intervals

Heterogeneity between 4 subtotals:  $\chi^2_3 = 5.0$ ; p > 0.1; NS

Heterogeneity within subtotals:  $\chi^2_{16} = 21.0$ ; p > 0.1; NS

Heterogeneity between 20 trials:  $\chi^2_{19} = 26.0$ ; p > 0.1; NS

\* 97U was (4E; 4CMF) vs (4CMF; 4E) vs (6CMF), and its controls count twice in subtotal and in total of events/woman-years; the study included women with highly proliferative disease, and slightly updated results from it have recently been published (webappendix p66)

Anthracyclines: A = doxorubicin (Adriamycin); E = Epirubicin

Other agents: C = cyclophosphamide; F = fluorouracil; M = methotrexate; V = vincristine

(Not shown: antibiotic, hormonal, local or steroid therapies)

All regimens q3week (unless specified as q4). Semicolon [:] indicates treatment sequence

×2 means d1,8 iv; ×4 means d3-6 iv

¶ Dose less than E90 or A60 per cycle of anthracycline

§ 94J interwoven drug schedule: anthracycline group omitted C, M or F respectively on cycles (3, 2 or 1) and (6, 5 or 4)

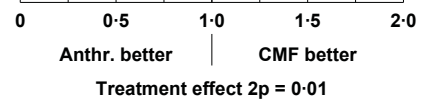

# P 29: BREAST CANCER MORTALITY (MORTALITY WITH RECURRENCE) in trials of any anthracycline-based regimen vs. standard CMF (or near-standard CMF)

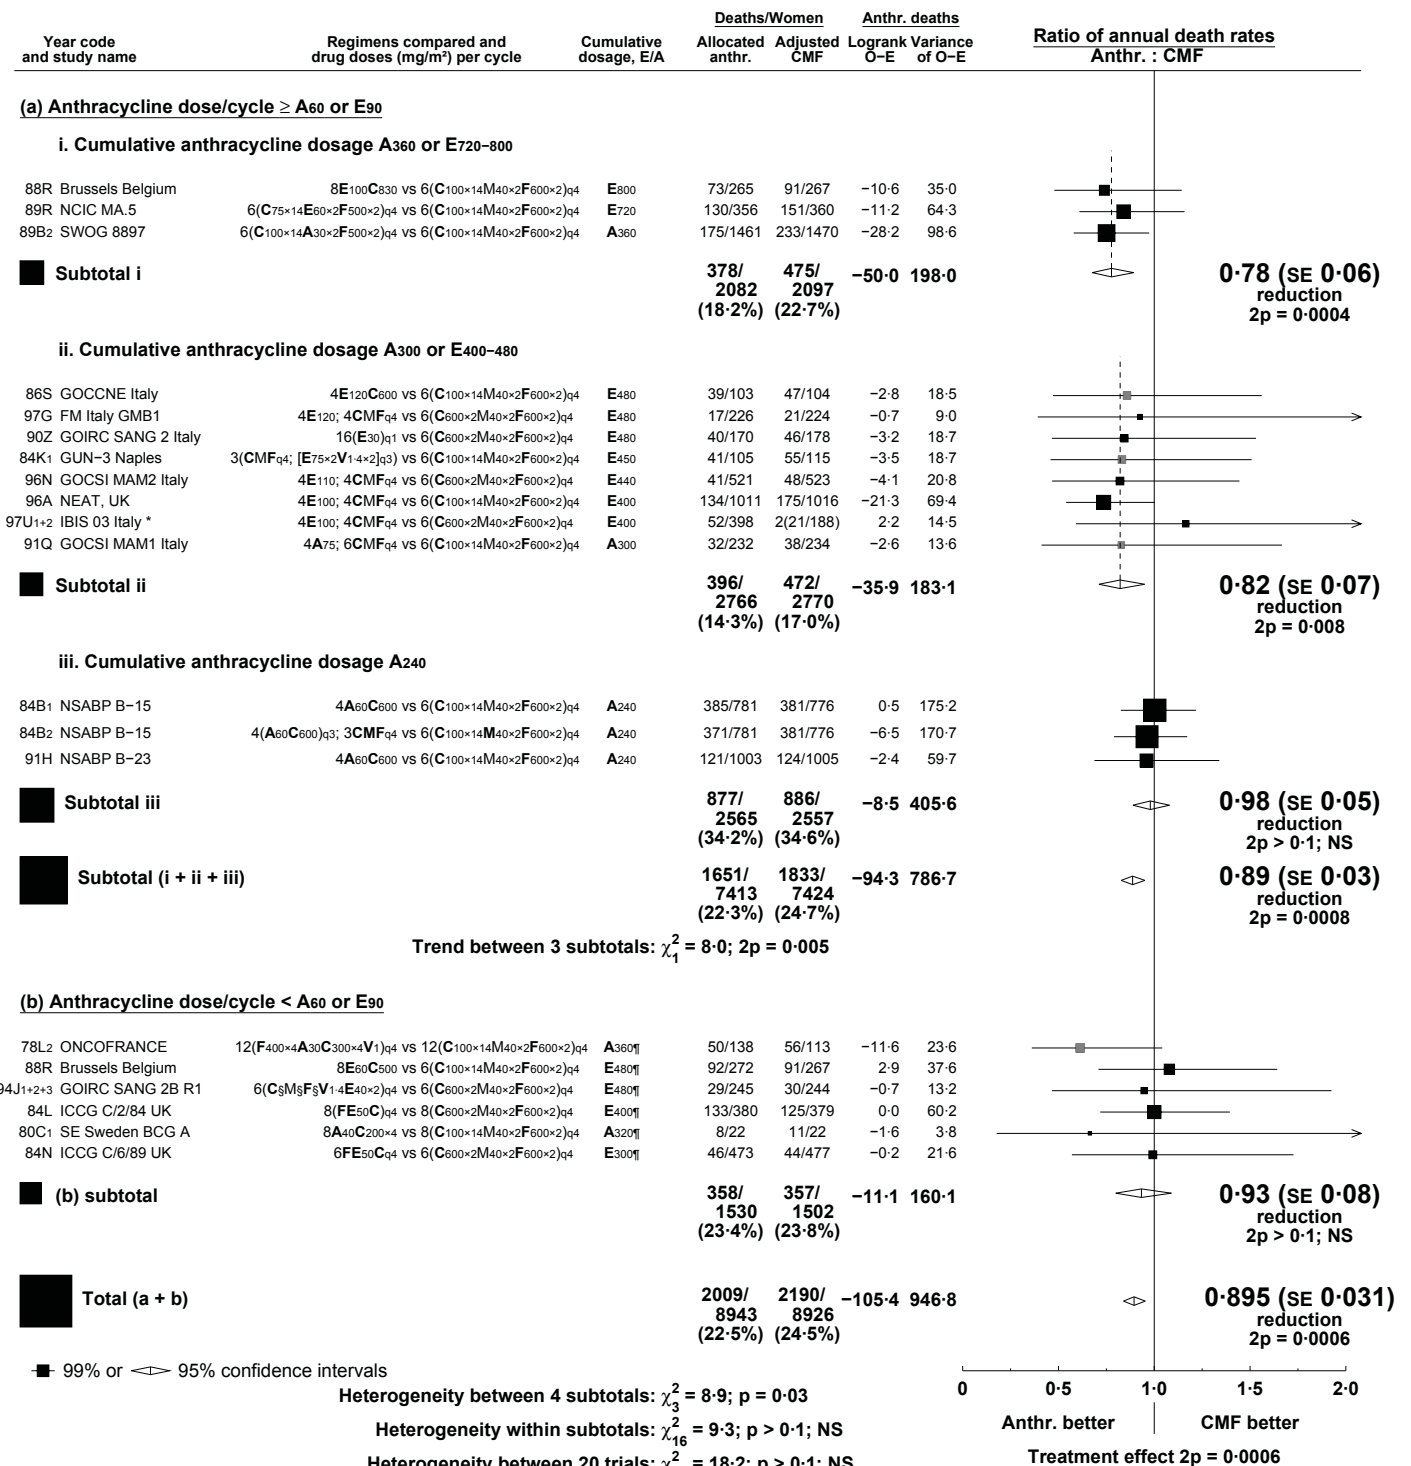

■ 99% or ◊ 95% confidence intervals

Heterogeneity between 4 subtotals:  $\chi^2_3 = 8.9$ ; p = 0.03

Heterogeneity within subtotals:  $\chi^2_{16} = 9.3$ ; p > 0.1; NS

Heterogeneity between 20 trials:  $\chi^2_{19} = 18.2$ ; p > 0.1; NS

\* 97U was (4E; 4CMF) vs (4CMF; 4E) vs (6CMF), and its controls count twice in subtotal and in total of deaths/women; the study included women with highly proliferative disease, and slightly updated results from it have recently been published (webappendix p66)

Anthracyclines: A = doxorubicin (Adriamycin); E = Epirubicin

Other agents: C = cyclophosphamide; F = fluorouracil; M = methotrexate; V = vincristine

(Not shown: antibiotic, hormonal, local or steroid therapies)

All regimens q3week (unless specified as q4). Semicolon ; indicates treatment sequence

×2 means d1,8 iv; ×4 means d3-6 iv

¶ Dose less than E90 or A60 per cycle of anthracycline

§ 94J interwoven drug schedule: anthracycline group omitted C, M or F respectively on cycles (3, 2 or 1) and (6, 5 or 4)

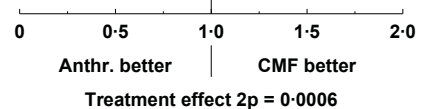

# P 30: MORTALITY WITHOUT RECURRENCE IN FIRST YEAR in trials of any anthracycline-based regimen vs. standard CMF (or near-standard CMF)

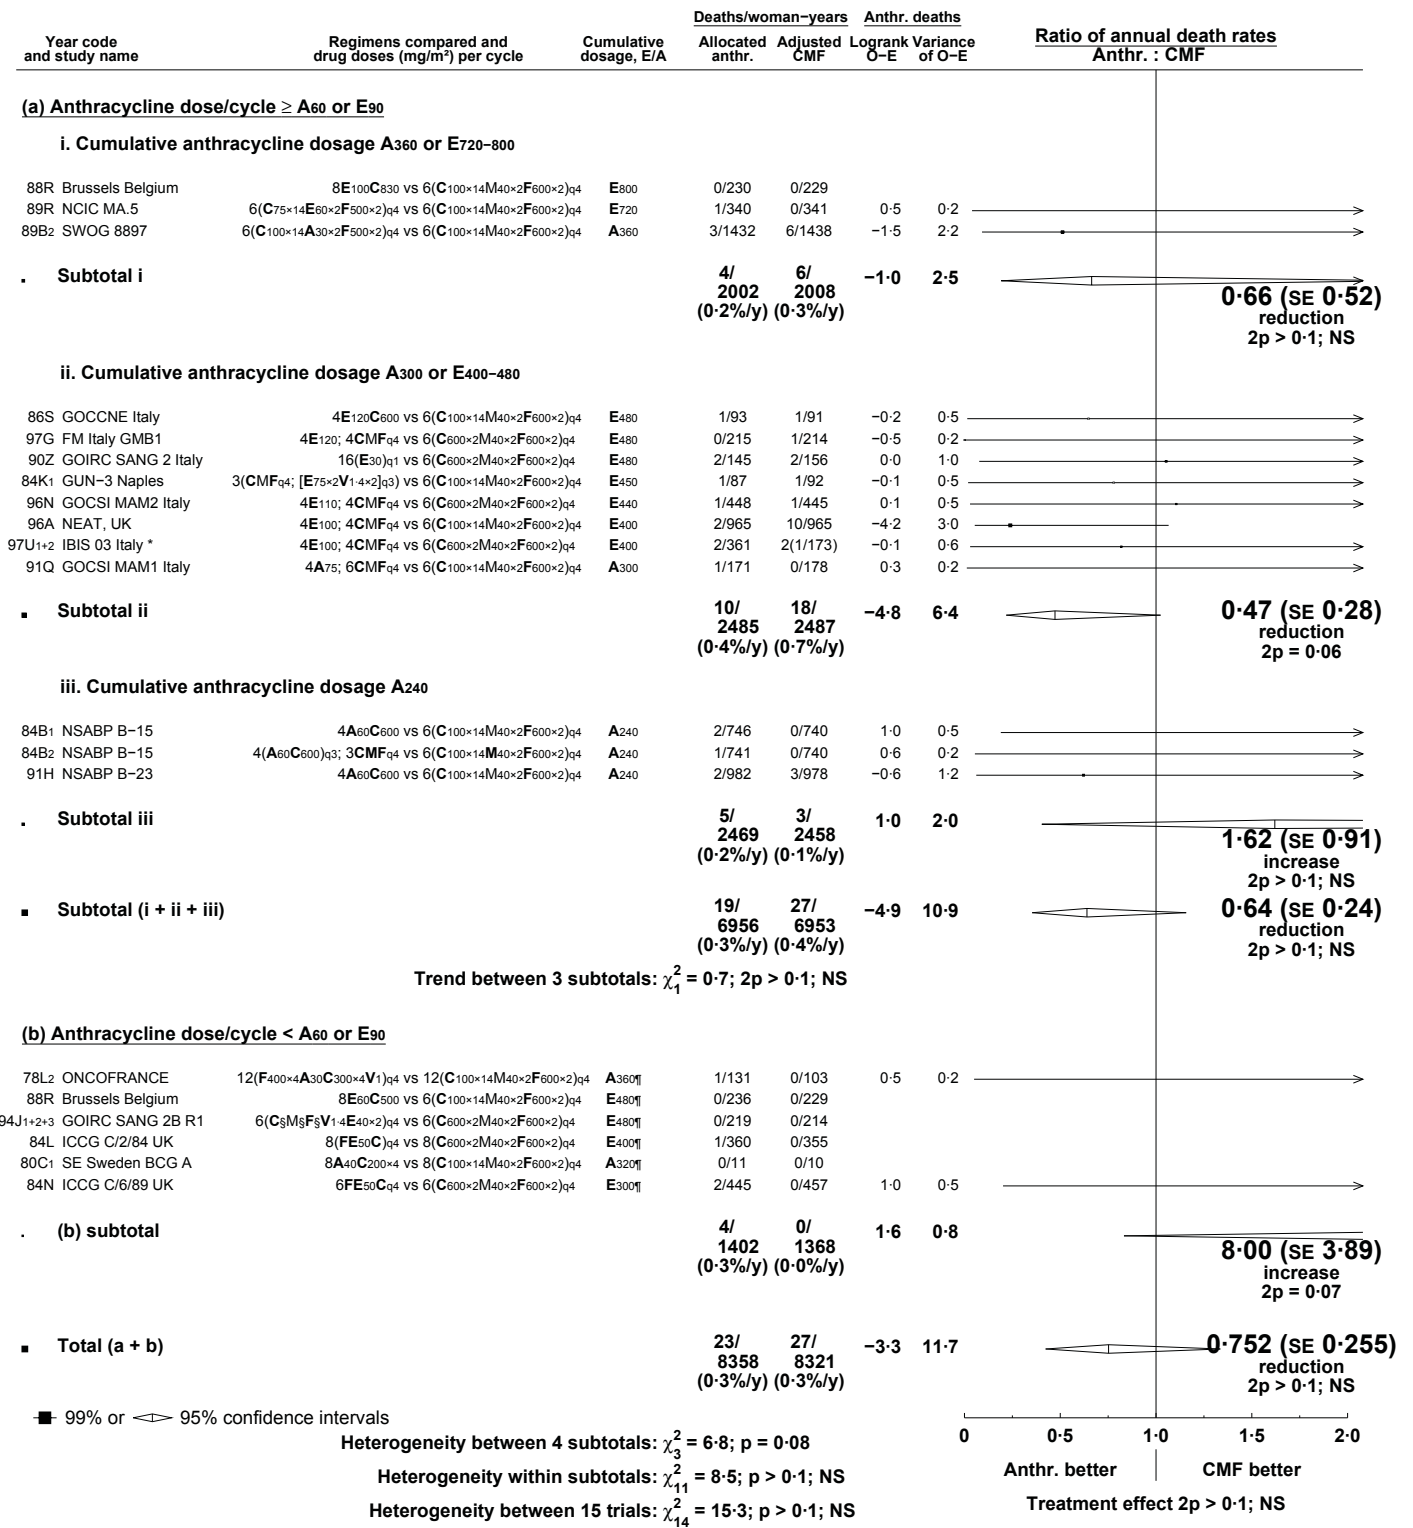

\* 97U was (4E; 4CMF) vs (4CMF; 4E) vs (6CMF), and its controls count twice in subtotal and in total of deaths/woman-years; the study included women with highly proliferative disease, and slightly updated results from it have recently been published (webappendix p66)

Anthracyclines: A = doxorubicin (Adriamycin); E = Epirubicin

Other agents: C = cyclophosphamide; F = fluorouracil; M = methotrexate; V = vincristine

(Not shown: antibiotic, hormonal, local or steroid therapies)

All regimens q3week (unless specified as q4). Semicolon [:] indicates treatment sequence

×2 means d1,8 iv; ×4 means d3-6 iv

¶ Dose less than E90 or A60 per cycle of anthracycline

§ 94J interwoven drug schedule: anthracycline group omitted C, M or F respectively on cycles (3, 2 or 1) and (6, 5 or 4)

# P 31: MORTALITY WITHOUT RECURRENCE in trials of any anthracycline-based regimen vs. standard CMF (or near-standard CMF)

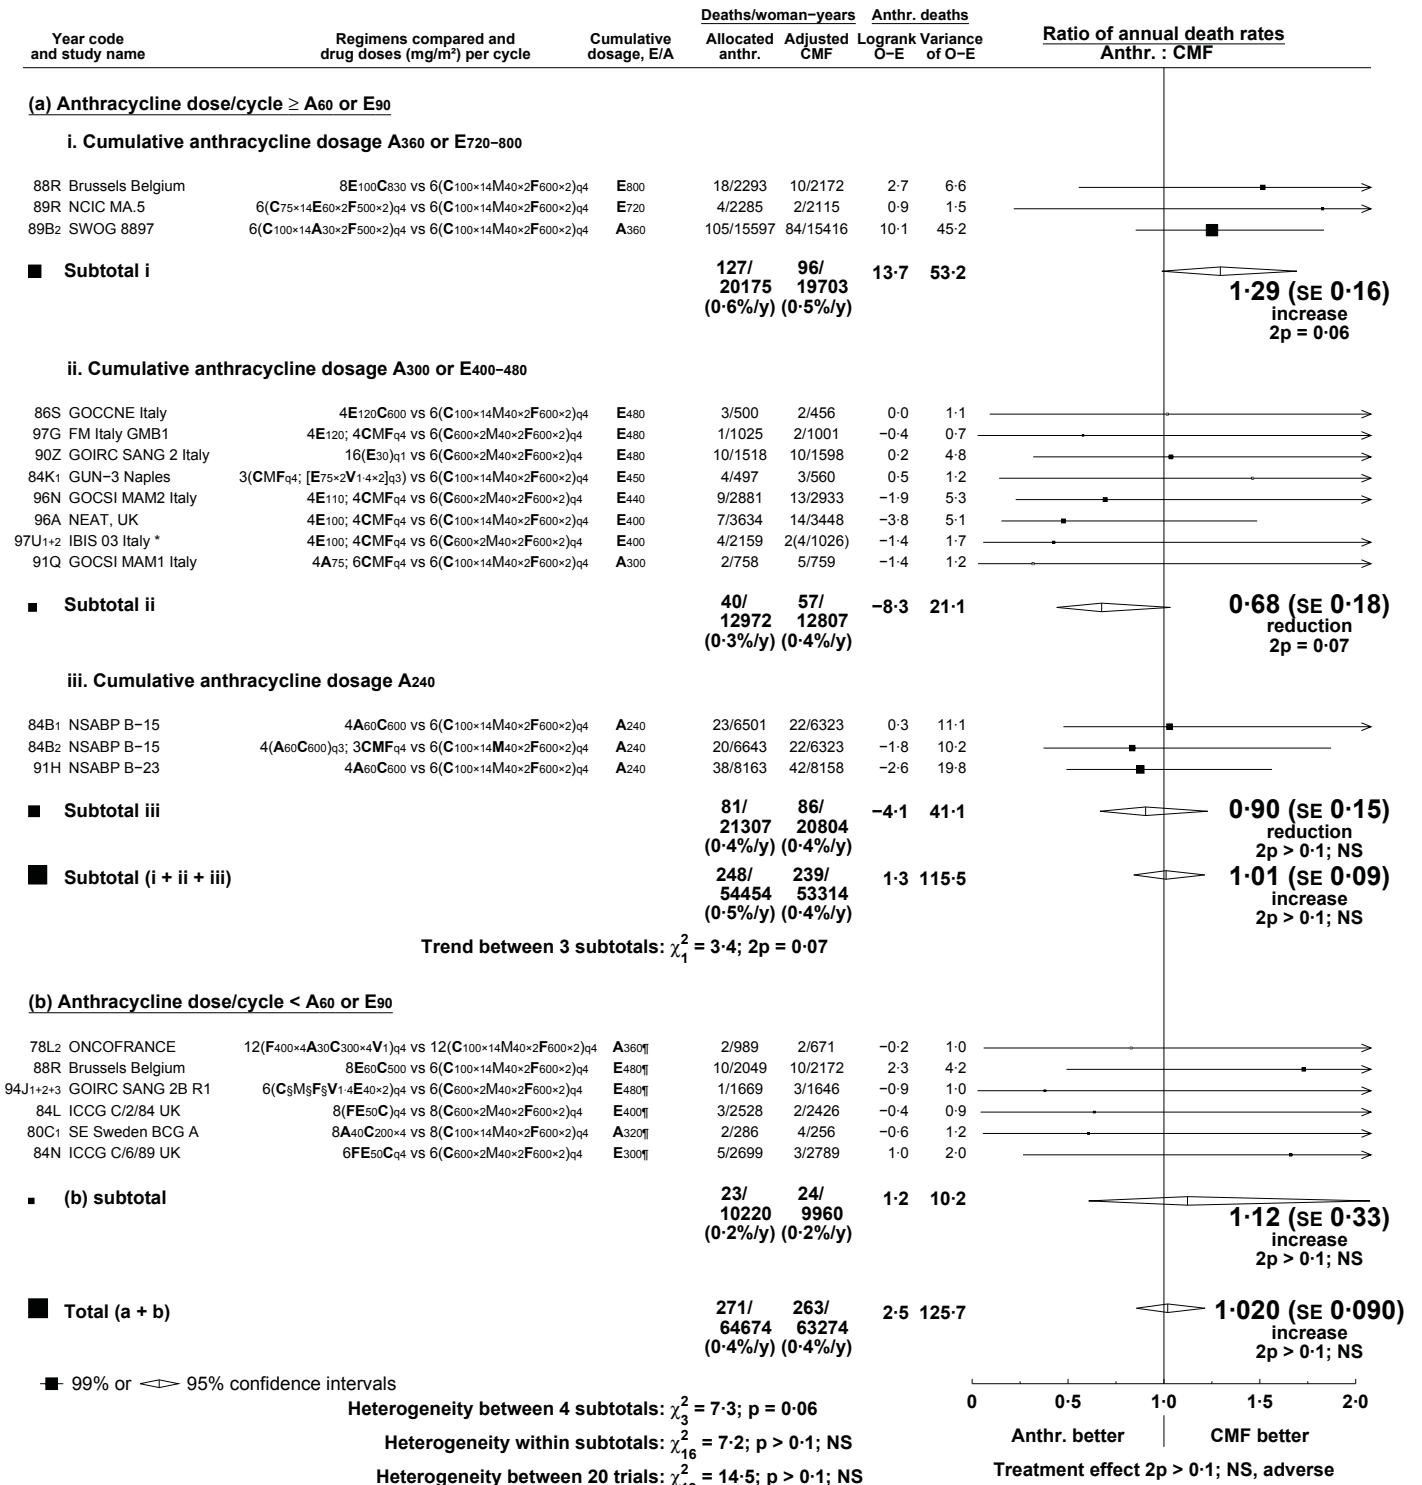

■ 99% or ◊ 95% confidence intervals

Heterogeneity between 4 subtotals:  $\chi^2_3 = 7.3$ ;  $p = 0.06$

Heterogeneity within subtotals:  $\chi^2_{16} = 7.2$ ;  $p > 0.1$ ; NS

Heterogeneity between 20 trials:  $\chi^2_{19} = 14.5$ ;  $p > 0.1$ ; NS

\* 97U was (4E; 4CMF) vs (4CMF; 4E) vs (6CMF), and its controls count twice in subtotal and in total of deaths/woman-years; the study included women with highly proliferative disease, and slightly updated results from it have recently been published (webappendix p66)

Anthracyclines: A = doxorubicin (Adriamycin); E = Epirubicin

Other agents: C = cyclophosphamide; F = fluorouracil; M = methotrexate; V = vincristine

(Not shown: antibiotic, hormonal, local or steroid therapies)

All regimens q3week (unless specified as q4). Semicolon [:] indicates treatment sequence

×2 means d1,8 iv; ×4 means d3-6 iv

¶ Dose less than E90 or A60 per cycle of anthracycline

§ 94J interwoven drug schedule: anthracycline group omitted C, M or F respectively on cycles (3, 2 or 1) and (6, 5 or 4)

0 0.5 1.0 1.5 2.0  
Anthr. better | CMF better  
Treatment effect  $2p > 0.1$ ; NS, adverse



# P 32: OVERALL MORTALITY in trials of any anthracycline-based regimen vs. standard CMF (or near-standard CMF)

| Year code and study name                                    | Regimens compared and drug doses (mg/m <sup>2</sup> ) per cycle | Cumulative dosage, E/A | Deaths/Women             |                          | Anthr. deaths |                 | Ratio of annual death rates Anthr. : CMF        |
|-------------------------------------------------------------|-----------------------------------------------------------------|------------------------|--------------------------|--------------------------|---------------|-----------------|-------------------------------------------------|
|                                                             |                                                                 |                        | Allocated anthr.         | Adjusted CMF             | Logrank O-E   | Variance of O-E |                                                 |
| <b>(a) Anthracycline dose/cycle ≥ A60 or E90</b>            |                                                                 |                        |                          |                          |               |                 |                                                 |
| <b>i. Cumulative anthracycline dosage A360 or E720-800</b>  |                                                                 |                        |                          |                          |               |                 |                                                 |
| 88R Brussels Belgium                                        | 8E100C830 vs 6(C100×14M40×2F600×2)q4                            | E800                   | 91/265                   | 101/267                  | -7.8          | 41.6            |                                                 |
| 89R NCIC MA.5                                               | 6(C75×14E60×2F500×2)q4 vs 6(C100×14M40×2F600×2)q4               | E720                   | 134/356                  | 153/360                  | -10.3         | 65.8            |                                                 |
| 89B2 SWOG 8897                                              | 6(C100×14A30×2F500×2)q4 vs 6(C100×14M40×2F600×2)q4              | A360                   | 280/1461                 | 317/1470                 | -18.1         | 143.7           |                                                 |
| <b>Subtotal i</b>                                           |                                                                 |                        | <b>505/2082 (24.3%)</b>  | <b>571/2097 (27.2%)</b>  | <b>-36.2</b>  | <b>251.2</b>    | <b>0.87 (SE 0.06) reduction 2p = 0.02</b>       |
| <b>ii. Cumulative anthracycline dosage A300 or E400-480</b> |                                                                 |                        |                          |                          |               |                 |                                                 |
| 86S GOCCNE Italy                                            | 4E120C600 vs 6(C100×14M40×2F600×2)q4                            | E480                   | 42/103                   | 49/104                   | -2.8          | 19.6            |                                                 |
| 97G FM Italy GMB1                                           | 4E120; 4CMFq4 vs 6(C600×2M40×2F600×2)q4                         | E480                   | 18/226                   | 23/224                   | -1.1          | 9.7             |                                                 |
| 90Z GOIRC SANG 2 Italy                                      | 16(E30)q1 vs 6(C600×2M40×2F600×2)q4                             | E480                   | 50/170                   | 56/178                   | -3.0          | 23.5            |                                                 |
| 84K1 GUN-3 Naples                                           | 3(CMFq4; [E75×2V1.4×2]q3) vs 6(C100×14M40×2F600×2)q4            | E450                   | 45/105                   | 58/115                   | -3.0          | 19.9            |                                                 |
| 96N GOCSI MAM2 Italy                                        | 4E110; 4CMFq4 vs 6(C600×2M40×2F600×2)q4                         | E440                   | 50/521                   | 61/523                   | -6.0          | 26.1            |                                                 |
| 96A NEAT, UK                                                | 4E100; 4CMFq4 vs 6(C100×14M40×2F600×2)q4                        | E400                   | 141/1011                 | 189/1016                 | -25.1         | 74.5            |                                                 |
| 97U1+2 IBIS 03 Italy *                                      | 4E100; 4CMFq4 vs 6(C600×2M40×2F600×2)q4                         | E400                   | 56/398                   | 2(25/188)                | 0.8           | 16.1            |                                                 |
| 91Q GOCSI MAM1 Italy                                        | 4A75; 6CMFq4 vs 6(C100×14M40×2F600×2)q4                         | A300                   | 34/232                   | 43/234                   | -4.0          | 14.8            |                                                 |
| <b>Subtotal ii</b>                                          |                                                                 |                        | <b>436/2766 (15.8%)</b>  | <b>529/2770 (19.1%)</b>  | <b>-44.2</b>  | <b>204.3</b>    | <b>0.81 (SE 0.06) reduction 2p = 0.002</b>      |
| <b>iii. Cumulative anthracycline dosage A240</b>            |                                                                 |                        |                          |                          |               |                 |                                                 |
| 84B1 NSABP B-15                                             | 4A60C600 vs 6(C100×14M40×2F600×2)q4                             | A240                   | 408/781                  | 403/776                  | 0.8           | 186.4           |                                                 |
| 84B2 NSABP B-15                                             | 4(A60C600)q3; 3CMFq4 vs 6(C100×14M40×2F600×2)q4                 | A240                   | 391/781                  | 403/776                  | -8.4          | 180.8           |                                                 |
| 91H NSABP B-23                                              | 4A60C600 vs 6(C100×14M40×2F600×2)q4                             | A240                   | 159/1003                 | 166/1005                 | -5.1          | 79.5            |                                                 |
| <b>Subtotal iii</b>                                         |                                                                 |                        | <b>958/2565 (37.3%)</b>  | <b>972/2557 (38.0%)</b>  | <b>-12.6</b>  | <b>446.7</b>    | <b>0.97 (SE 0.05) reduction 2p &gt; 0.1; NS</b> |
| <b>Subtotal (i + ii + iii)</b>                              |                                                                 |                        | <b>1899/7413 (25.6%)</b> | <b>2072/7424 (27.9%)</b> | <b>-93.1</b>  | <b>902.1</b>    | <b>0.90 (SE 0.03) reduction 2p = 0.002</b>      |
| Trend between 3 subtotals: $\chi^2_1 = 2.9$ ; 2p = 0.09     |                                                                 |                        |                          |                          |               |                 |                                                 |
| <b>(b) Anthracycline dose/cycle &lt; A60 or E90</b>         |                                                                 |                        |                          |                          |               |                 |                                                 |
| 78L2 ONCOFRANCE                                             | 12(F400×4A30C300×4V1)q4 vs 12(C100×14M40×2F600×2)q4             | A360¶                  | 52/138                   | 58/113                   | -11.7         | 24.6            |                                                 |
| 88R Brussels Belgium                                        | 8E60C600 vs 6(C100×14M40×2F600×2)q4                             | E480¶                  | 102/272                  | 101/267                  | 5.1           | 41.9            |                                                 |
| 94J1+2+3 GOIRC SANG 2B R1                                   | 6(C5M5F5V1.4E40×2)q4 vs 6(C600×2M40×2F600×2)q4                  | E480¶                  | 30/245                   | 33/244                   | -1.7          | 14.1            |                                                 |
| 84L ICCG C/2/84 UK                                          | 8(FE50C)q4 vs 8(C600×2M40×2F600×2)q4                            | E400¶                  | 136/380                  | 127/379                  | -0.4          | 61.1            |                                                 |
| 80C1 SE Sweden BCG A                                        | 8A40C200×4 vs 8(C100×14M40×2F600×2)q4                           | A320¶                  | 10/22                    | 15/22                    | -2.1          | 5.0             |                                                 |
| 84N ICCG C/6/89 UK                                          | 6FE50Cq4 vs 6(C600×2M40×2F600×2)q4                              | E300¶                  | 51/473                   | 47/477                   | 0.8           | 23.6            |                                                 |
| <b>(b) subtotal</b>                                         |                                                                 |                        | <b>381/1530 (24.9%)</b>  | <b>381/1502 (25.4%)</b>  | <b>-10.0</b>  | <b>170.3</b>    |                                                 |
| <b>Total (a + b)</b>                                        |                                                                 |                        | <b>2280/8943 (25.5%)</b> | <b>2453/8926 (27.5%)</b> | <b>-103.0</b> | <b>1072.4</b>   | <b>0.908 (SE 0.029) reduction 2p = 0.002</b>    |

■ 99% or ◊ 95% confidence intervals

Heterogeneity between 4 subtotals:  $\chi^2_3 = 5.8$ ; p > 0.1; NS

Heterogeneity within subtotals:  $\chi^2_{16} = 10.0$ ; p > 0.1; NS

Heterogeneity between 20 trials:  $\chi^2_{19} = 15.9$ ; p > 0.1; NS

\* 97U was (4E; 4CMF) vs (4CMF; 4E) vs (6CMF), and its controls count twice in subtotal and in total of deaths/women; the study included women with highly proliferative disease, and slightly updated results from it have recently been published (webappendix p66)

Anthracyclines: A = doxorubicin (Adriamycin); E = Epirubicin

Other agents: C = cyclophosphamide; F = fluorouracil; M = methotrexate; V = vincristine (Not shown: antibiotic, hormonal, local or steroid therapies)

All regimens q3week (unless specified as q4). Semicolon ; indicates treatment sequence ×2 means d1,8 iv; ×4 means d3-6 iv

¶ Dose less than E90 or A60 per cycle of anthracycline

§ 94J interwoven drug schedule: anthracycline group omitted C, M or F respectively on cycles (3, 2 or 1) and (6, 5 or 4)

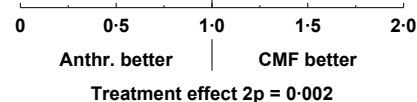

# P 33: EARLY RECURRENCE (first 5 years) in trials of any anthracycline-based regimen vs. No chemotherapy

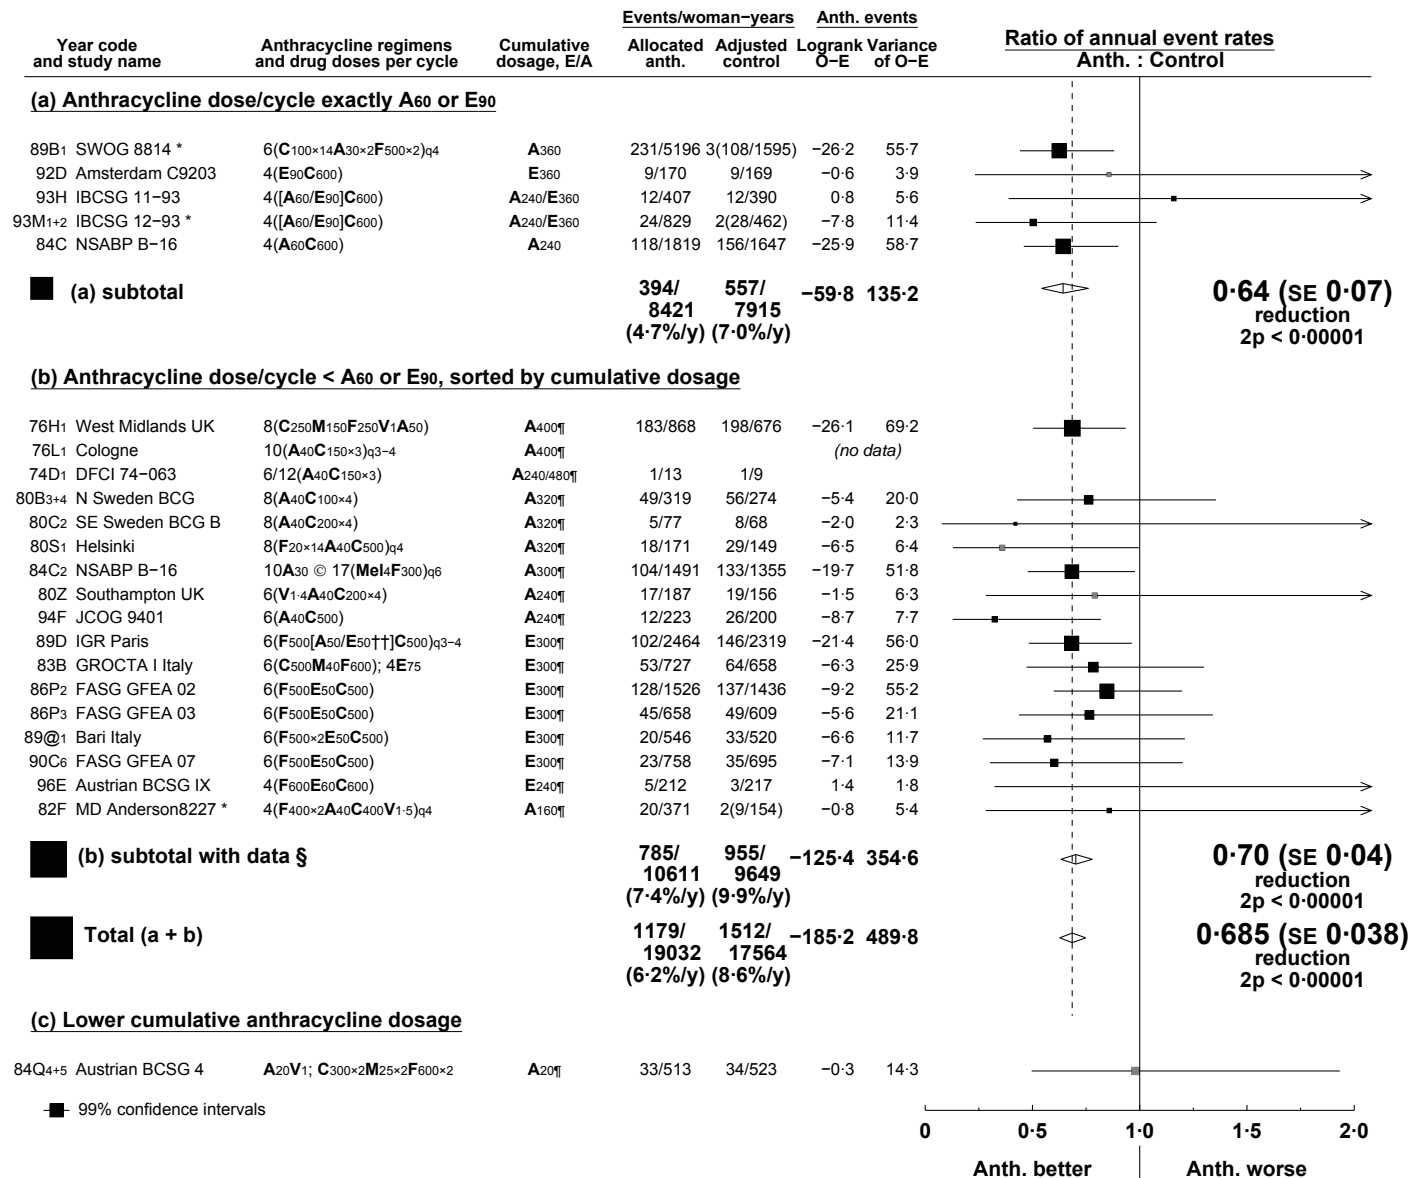

§ 1 trial with no data does not contribute to subtotals or to the overall total.

\* For balance, subtotals and totals count control patients 2 or 3 times in trials with 2 or 3 times as many allocated chemotherapy; logrank statistics are unaffected.

Anthracyclines: **A** = doxorubicin (Adriamycin); **E** = Epirubicin

Other agents: **C** = cyclophosphamide; **F** = fluorouracil; **M** = methotrexate; **Mel** = Melphalan; **V** = vincristine

(Not shown: antibiotic, hormonal, local or steroid therapies)

All regimens q3week (unless specified as q4). Semicolon [:] indicates treatment sequence, © indicates concurrent regimens

×2 means d1,8 iv; ×4 means d3-6 iv

¶ Dose less than A60 or E90 per cycle

††91% given E, 9% given A

# P 34: RECURRENCE in trials of any anthracycline-based regimen vs. No chemotherapy

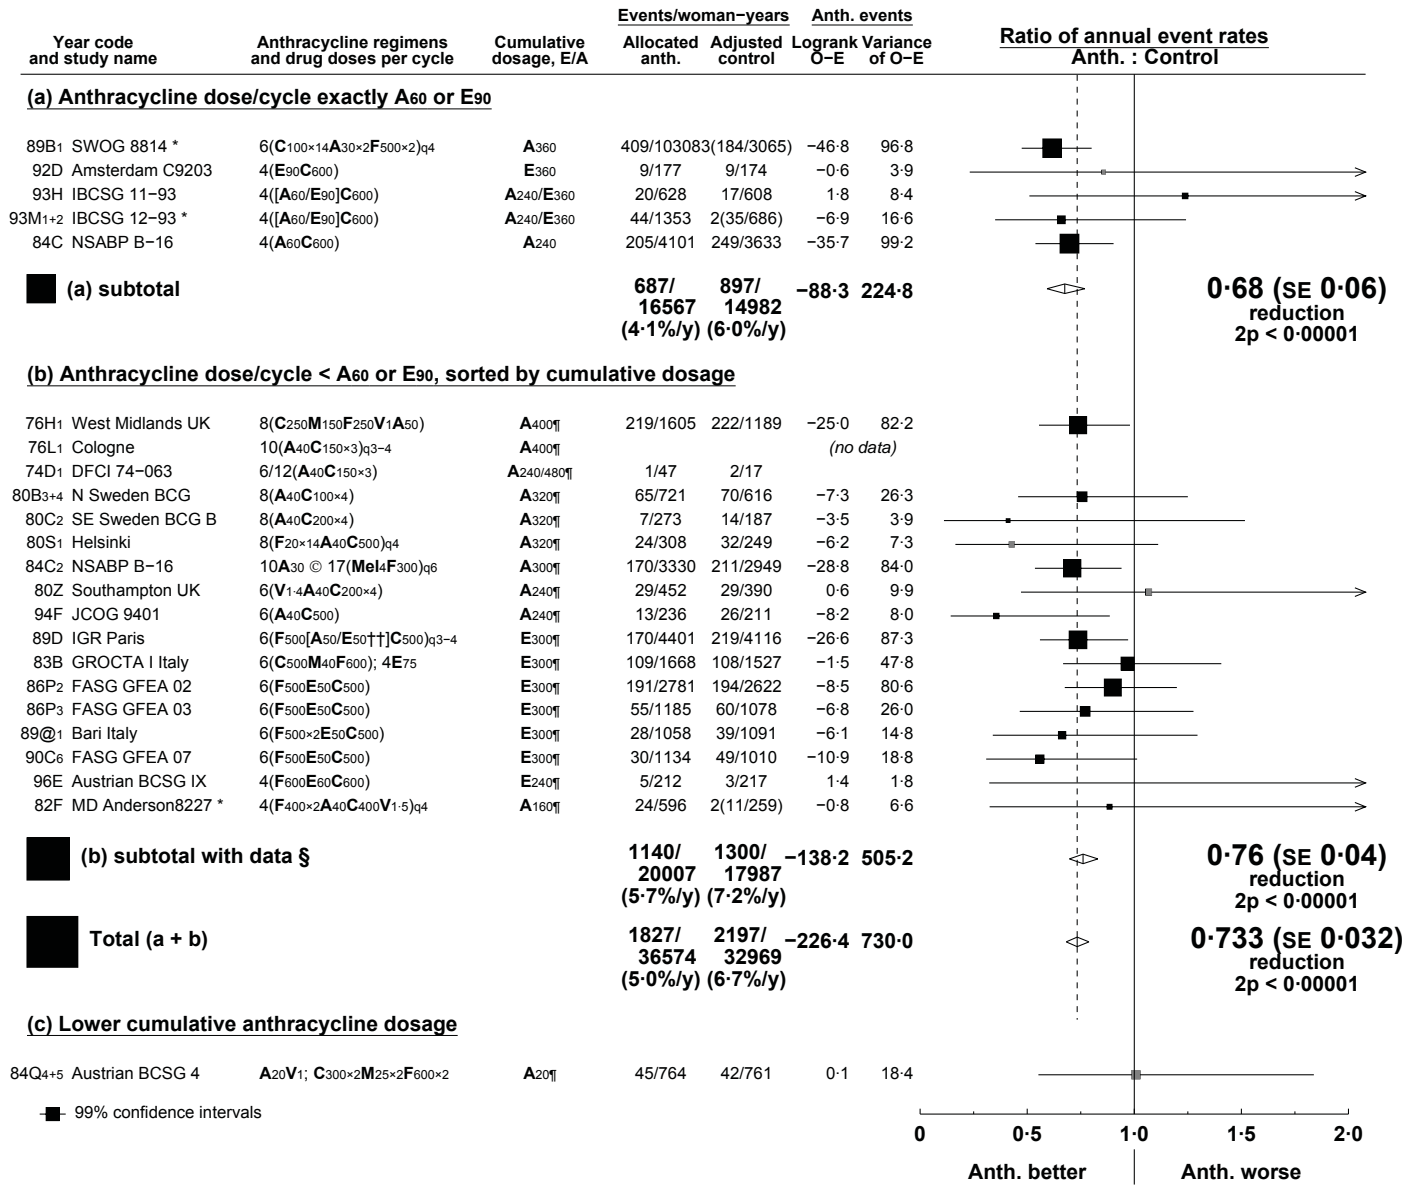

■ 99% confidence intervals

§ 1 trial with no data does not contribute to subtotals or to the overall total.

\* For balance, subtotals and totals count control patients 2 or 3 times in trials with 2 or 3 times as many allocated chemotherapy; logrank statistics are unaffected.

Anthracyclines: **A** = doxorubicin (Adriamycin); **E** = Epirubicin

Other agents: **C** = cyclophosphamide; **F** = fluorouracil; **M** = methotrexate; **Mel** = Melphalan; **V** = vincristine

(Not shown: antibiotic, hormonal, local or steroid therapies)

All regimens q3week (unless specified as q4). Semicolon [:] indicates treatment sequence, © indicates concurrent regimens

×2 means d1,8 iv; ×4 means d3-6 iv

¶ Dose less than A60 or E90 per cycle

††91% given E, 9% given A

# P 35: BREAST CANCER MORTALITY (MORTALITY WITH RECURRENCE) in trials of any anthracycline-based regimen vs. No chemotherapy

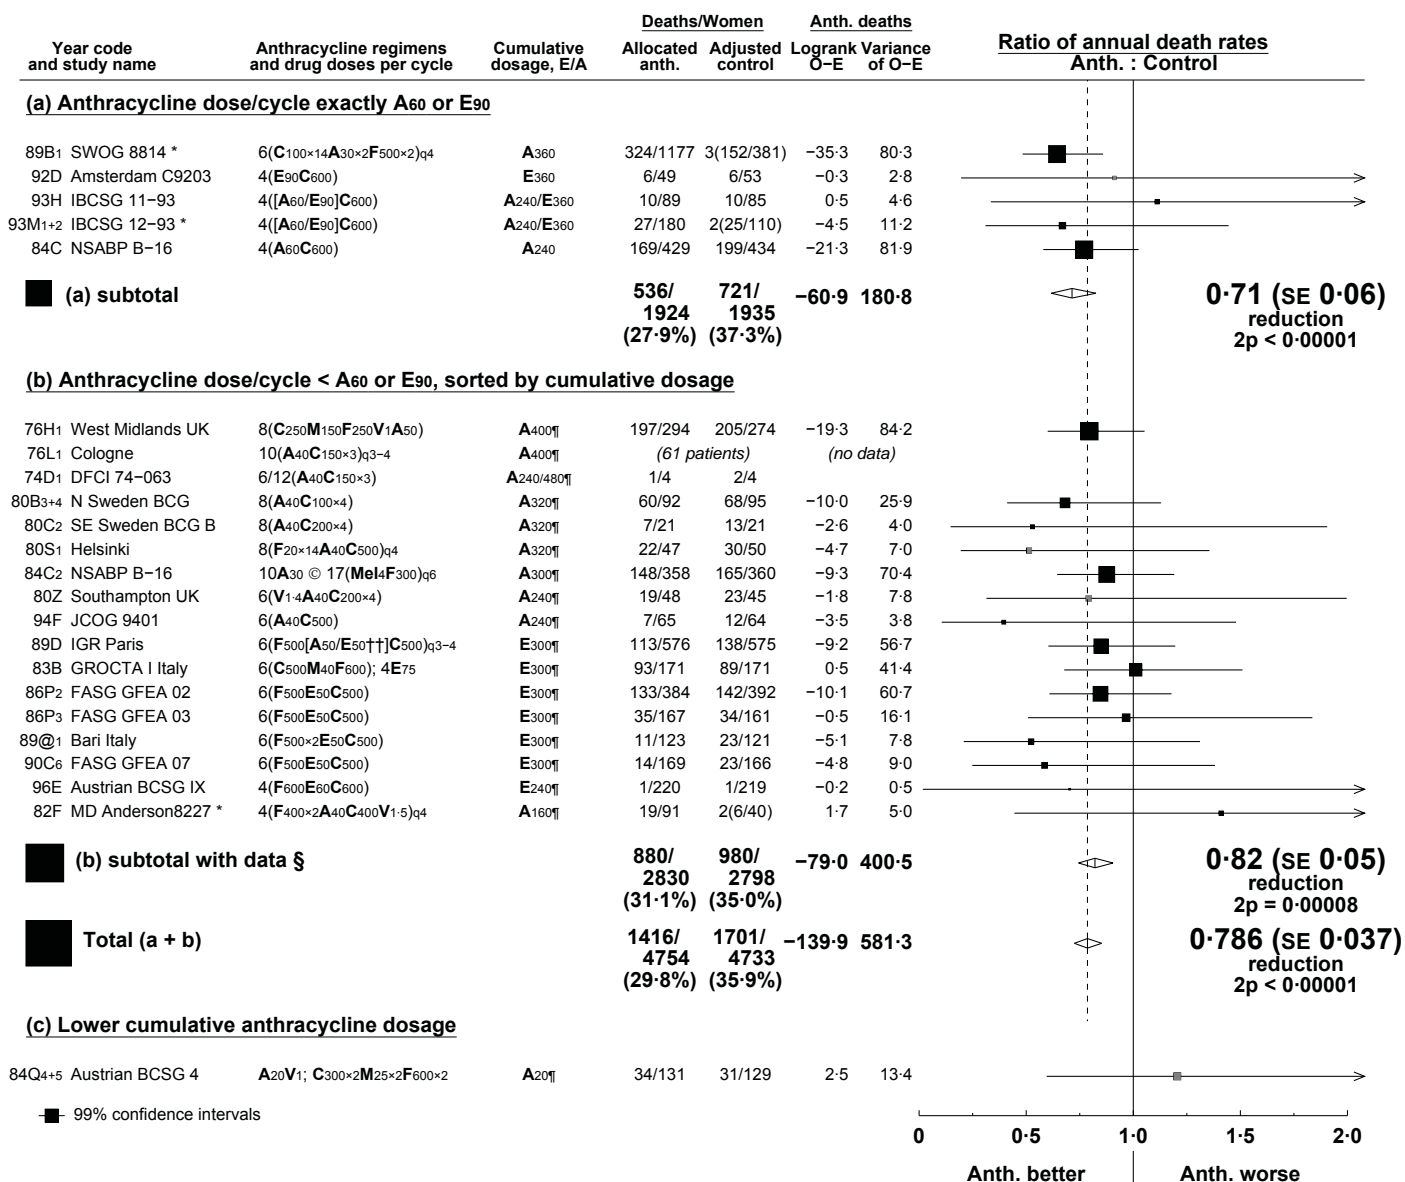

§ 1 trial with no data does not contribute to subtotals or to the overall total.

\* For balance, subtotals and totals count control patients 2 or 3 times in trials with 2 or 3 times as many allocated chemotherapy; logrank statistics are unaffected.

Anthracyclines: **A** = doxorubicin (Adriamycin); **E** = Epirubicin

Other agents: **C** = cyclophosphamide; **F** = fluorouracil; **M** = methotrexate; **Mel** = Melphalan; **V** = vincristine

(Not shown: antibiotic, hormonal, local or steroid therapies)

All regimens q3week (unless specified as q4). Semicolon [:] indicates treatment sequence, © indicates concurrent regimens

×2 means d1,8 iv; ×4 means d3-6 iv

¶ Dose less than A60 or E90 per cycle

††91% given E, 9% given A

# P 36: MORTALITY WITHOUT RECURRENCE IN FIRST YEAR in trials of any anthracycline-based regimen vs. No chemotherapy

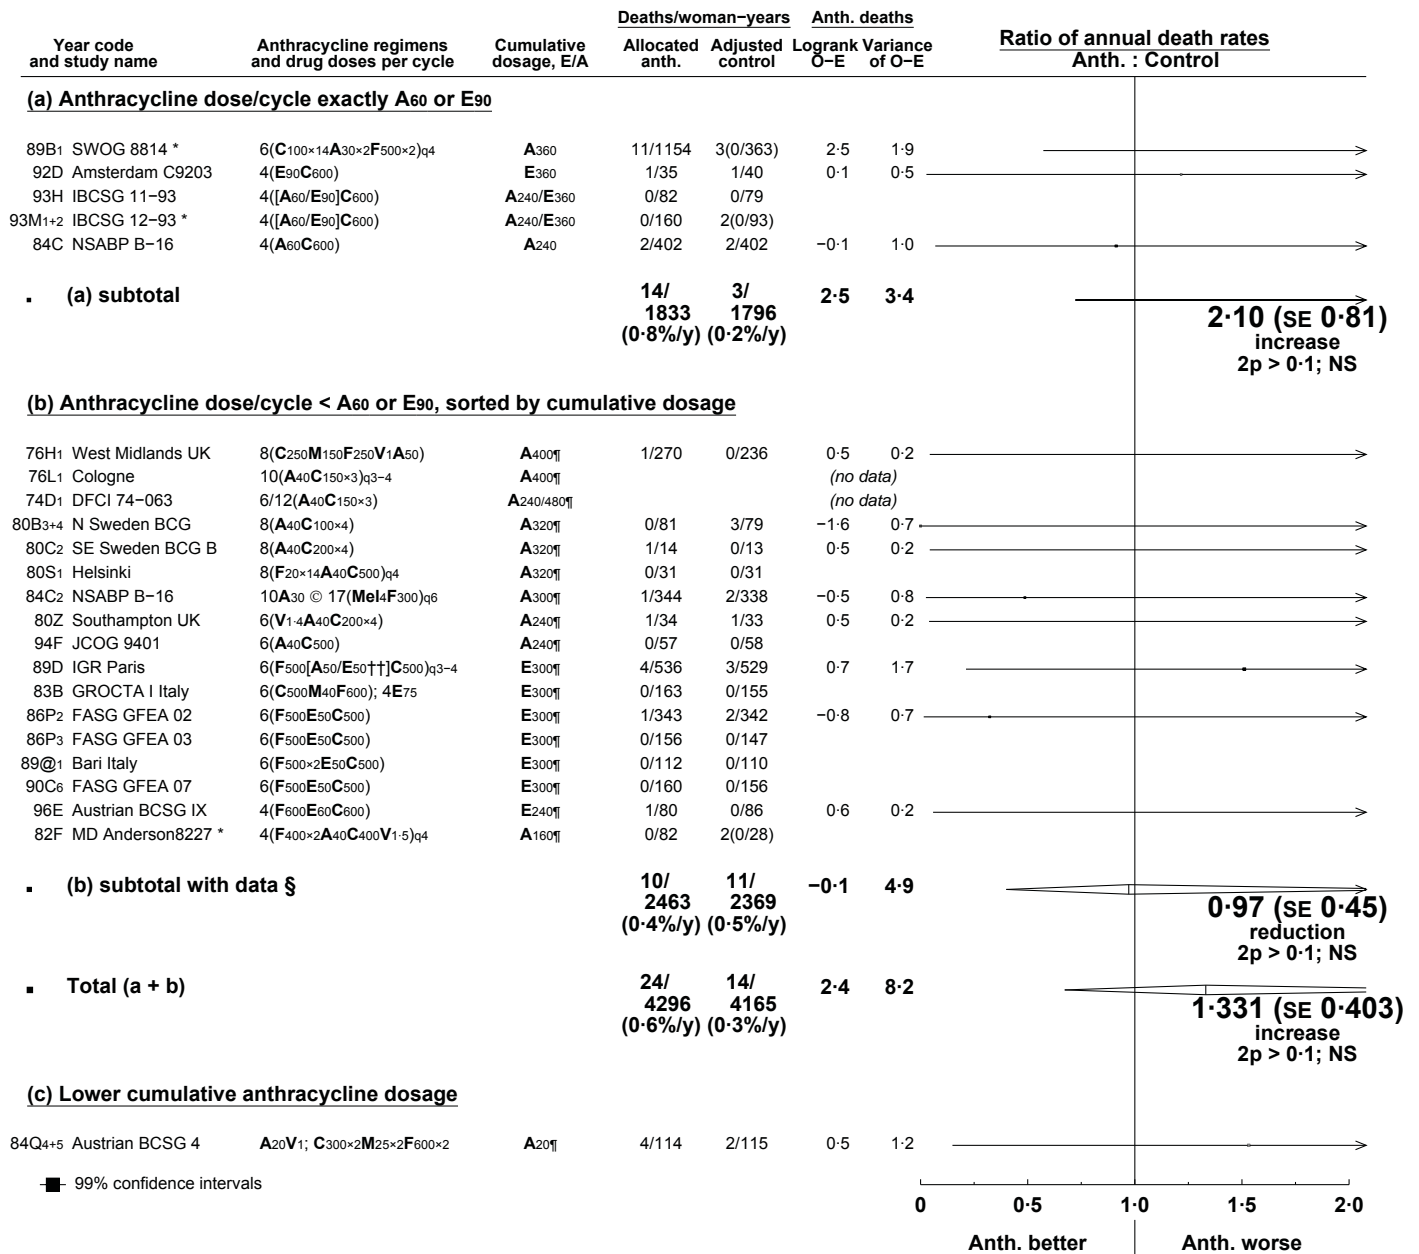

§ 2 trials with no data do not contribute to subtotals or to the overall total.

\* For balance, subtotals and totals count control patients 2 or 3 times in trials with 2 or 3 times as many allocated chemotherapy; logrank statistics are unaffected.

Anthracyclines: **A** = doxorubicin (Adriamycin); **E** = Epirubicin

Other agents: **C** = cyclophosphamide; **F** = fluorouracil; **M** = methotrexate; **Mel** = Melphalan; **V** = vincristine

(Not shown: antibiotic, hormonal, local or steroid therapies)

All regimens q3week (unless specified as q4). Semicolon [;] indicates treatment sequence, © indicates concurrent regimens

×2 means d1,8 iv; ×4 means d3-6 iv

¶ Dose less than A60 or E90 per cycle

††91% given E, 9% given A

# P 37: MORTALITY WITHOUT RECURRENCE in trials of any anthracycline-based regimen vs. No chemotherapy

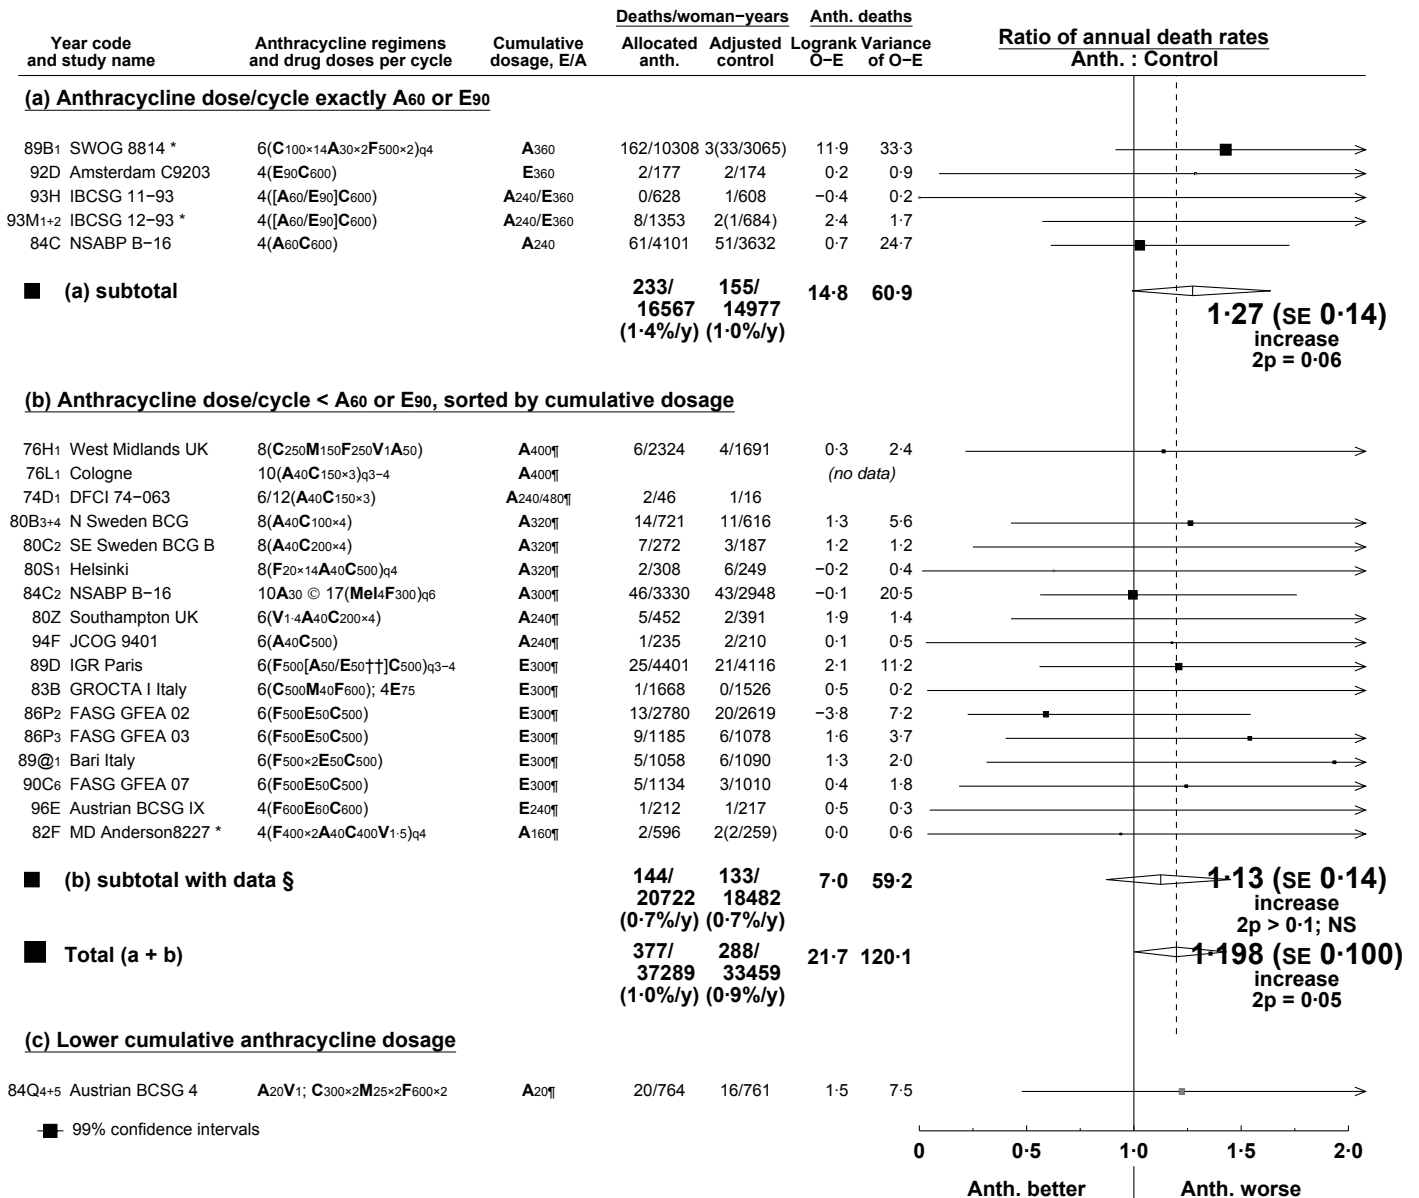

§ 1 trial with no data does not contribute to subtotals or to the overall total.

\* For balance, subtotals and totals count control patients 2 or 3 times in trials with 2 or 3 times as many allocated chemotherapy; logrank statistics are unaffected.

Anthracyclines: **A** = doxorubicin (Adriamycin); **E** = Epirubicin

Other agents: **C** = cyclophosphamide; **F** = fluorouracil; **M** = methotrexate; **Mel** = Melphalan; **V** = vincristine

(Not shown: antibiotic, hormonal, local or steroid therapies)

All regimens q3week (unless specified as q4). Semicolon [:] indicates treatment sequence, © indicates concurrent regimens

x2 means d1,8 iv; x4 means d3-6 iv

¶ Dose less than A60 or E90 per cycle

††91% given E, 9% given A

# P 38: OVERALL MORTALITY in trials of any anthracycline-based regimen vs. No chemotherapy

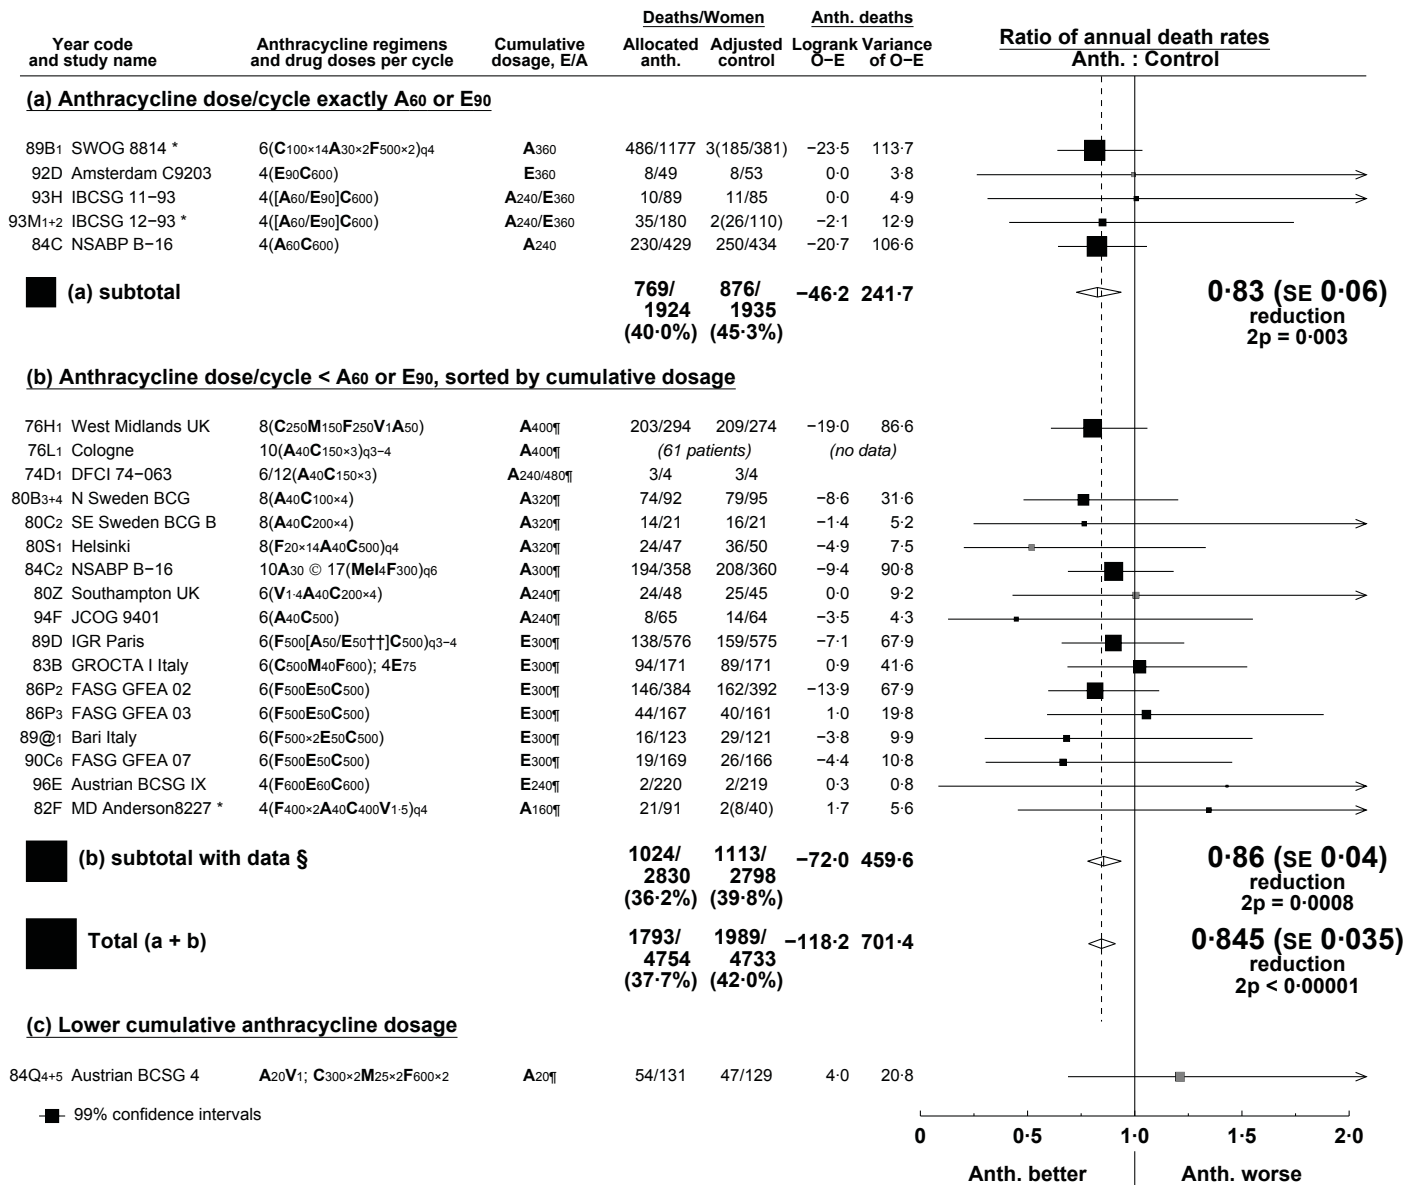

§ 1 trial with no data does not contribute to subtotals or to the overall total.

\* For balance, subtotals and totals count control patients 2 or 3 times in trials with 2 or 3 times as many allocated chemotherapy; logrank statistics are unaffected.

Anthracyclines: **A** = doxorubicin (Adriamycin); **E** = Epirubicin

Other agents: **C** = cyclophosphamide; **F** = fluorouracil; **M** = methotrexate; **Mel** = Melphalan; **V** = vincristine

(Not shown: antibiotic, hormonal, local or steroid therapies)

All regimens q3week (unless specified as q4). Semicolon [:] indicates treatment sequence, © indicates concurrent regimens

×2 means d1,8 iv; ×4 means d3-6 iv

¶ Dose less than A60 or E90 per cycle

††91% given E, 9% given A

# P 39: EARLY RECURRENCE (first 5 years) in trials of anthracycline-based regimen (eg, standard 4AC) or standard CMF (or near-standard CMF) vs. No chemotherapy

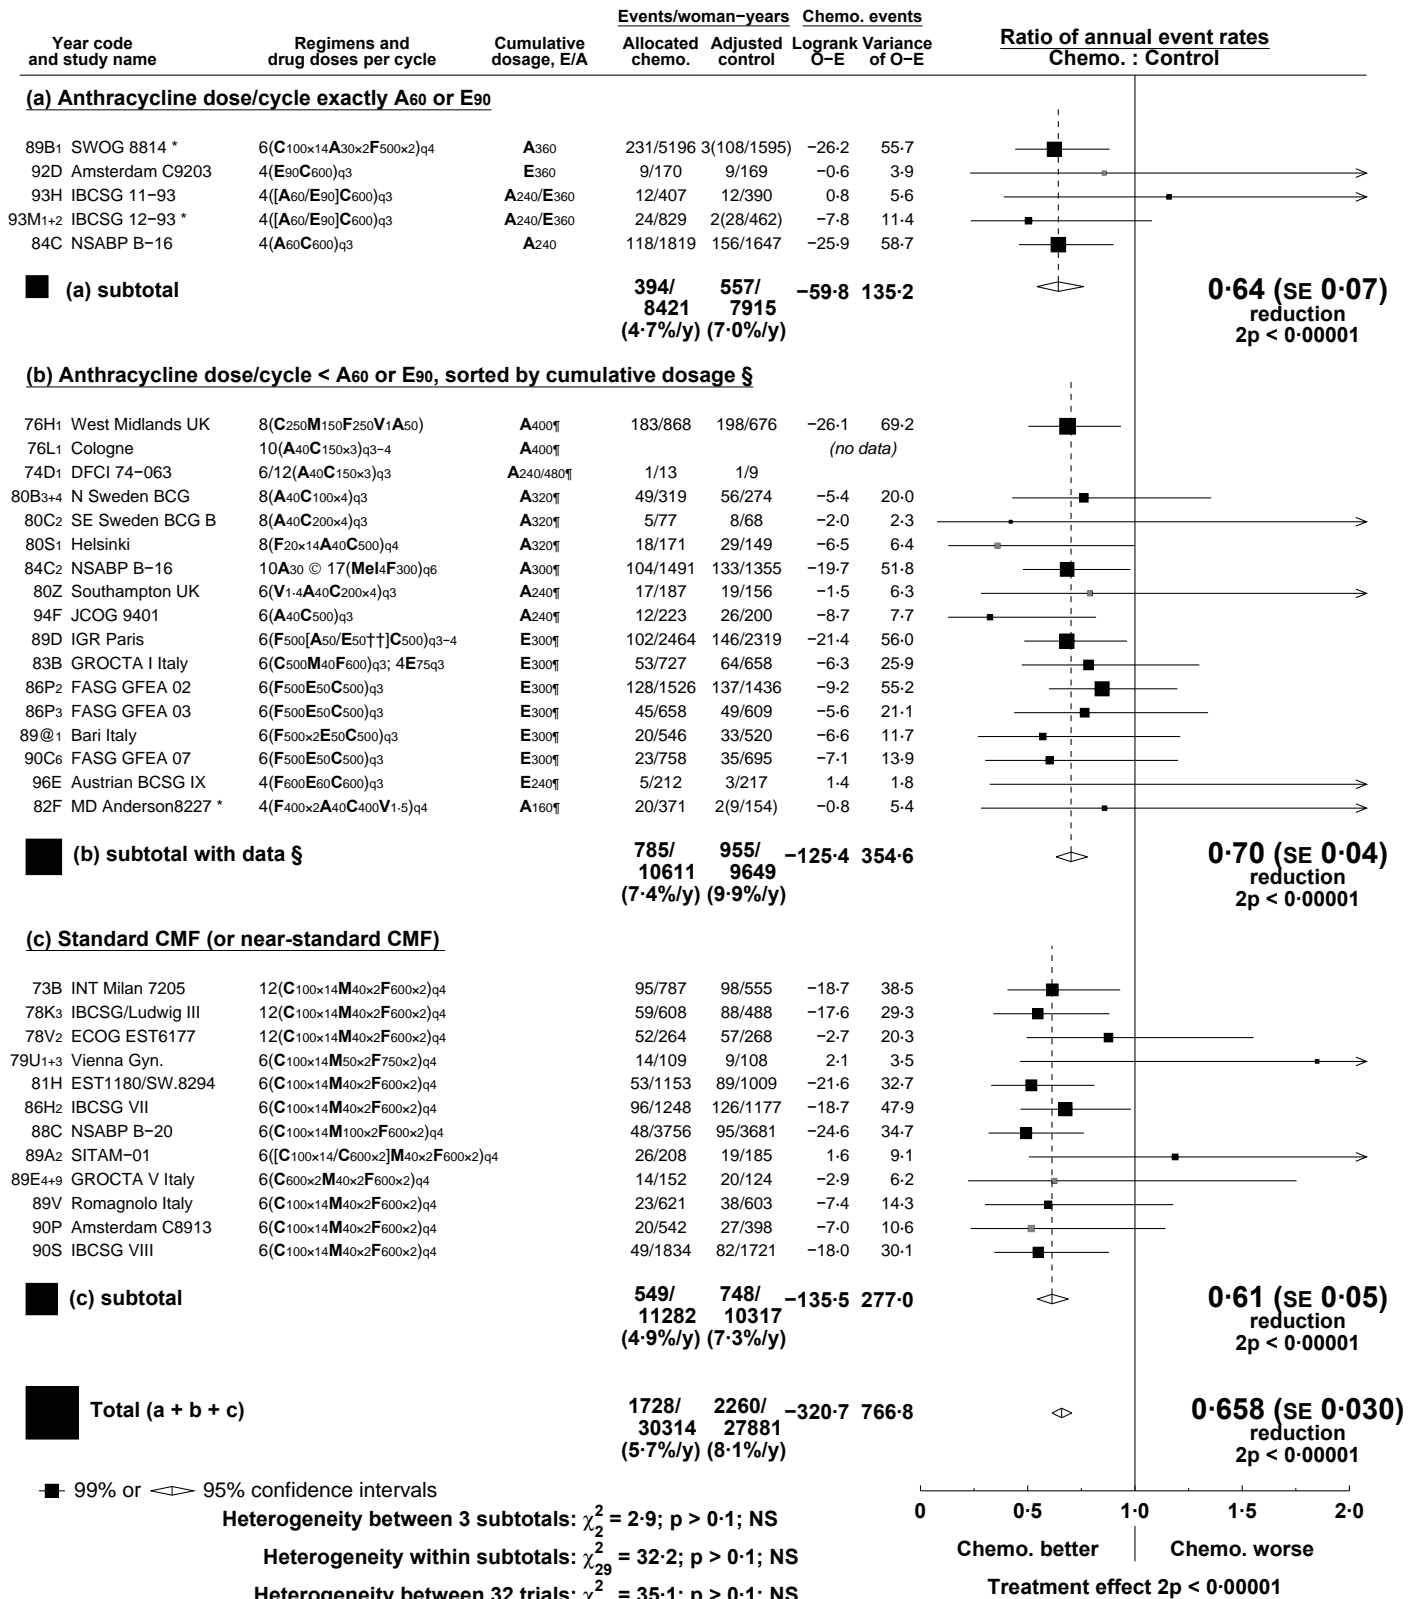



# P 40: RECURRENCE in trials of anthracycline-based regimen (eg, standard 4AC) or standard CMF (or near-standard CMF) vs. No chemotherapy

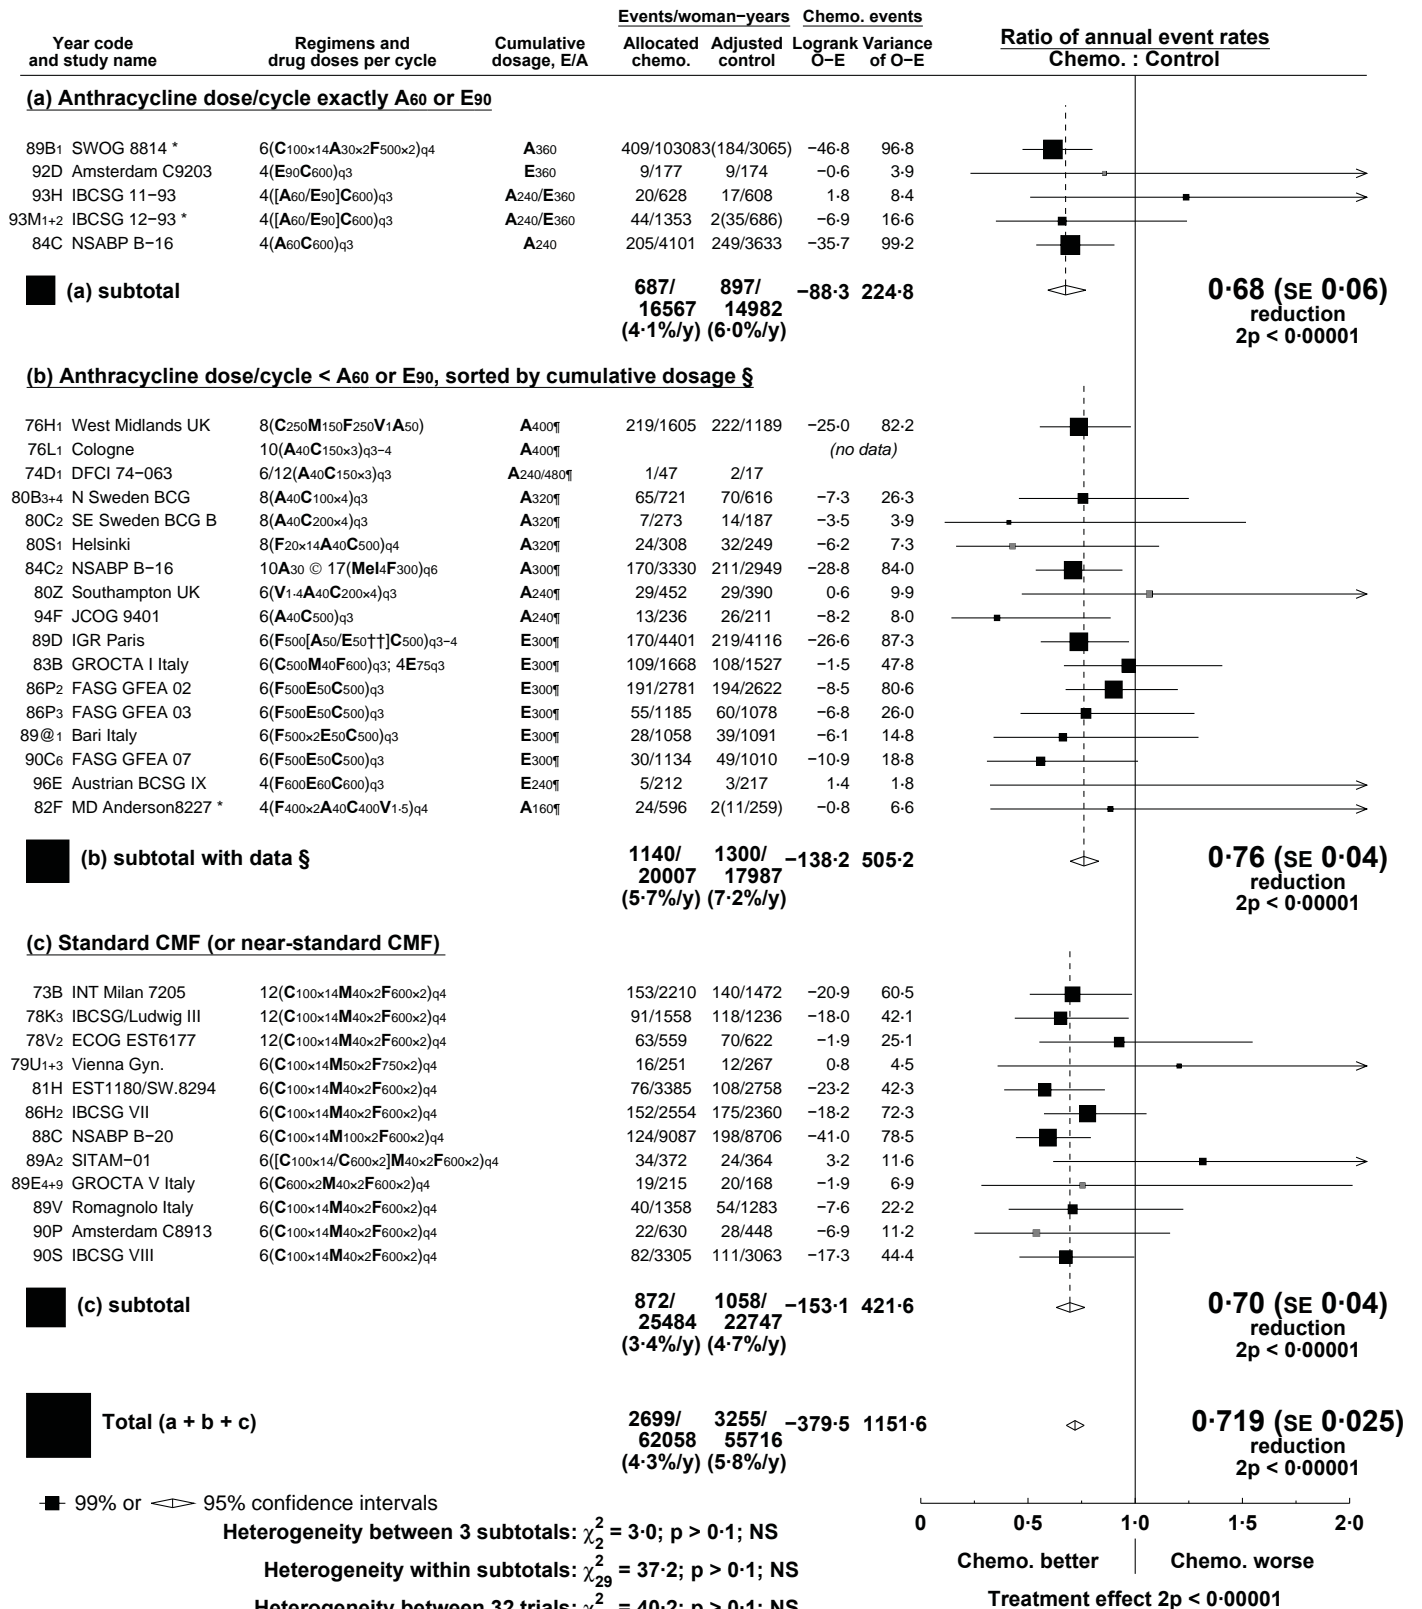

■ 99% or ◊ 95% confidence intervals

Heterogeneity between 3 subtotals:  $\chi^2_2 = 3.0$ ;  $p > 0.1$ ; NS

Heterogeneity within subtotals:  $\chi^2_{29} = 37.2$ ;  $p > 0.1$ ; NS

Heterogeneity between 32 trials:  $\chi^2_{31} = 40.2$ ;  $p > 0.1$ ; NS

§ 1 trial with no data does not contribute to subtotals or to the overall total.

Anthracyclines: **A** = doxorubicin (Adriamycin); **E** = Epirubicin

Other agents: **C** = cyclophosphamide; **F** = fluorouracil; **M** = methotrexate; **Mel** = Melphalan; **V** = vincristine

(Not shown: antibiotic, hormonal, local or steroid therapies)

×2 means d1,8 iv; ×4 means d3-6 iv

¶ Dose less than A60 or E90 per cycle

††91% given E, 9% given A

0 0.5 1.0 1.5 2.0  
Chemo. better | Chemo. worse  
Treatment effect 2p < 0.00001

# P 41: BREAST CANCER MORTALITY (MORTALITY WITH RECURRENCE) in trials of anthracycline-based regimen (eg, standard 4AC) or standard CMF (or near-standard CMF) vs. No chemotherapy

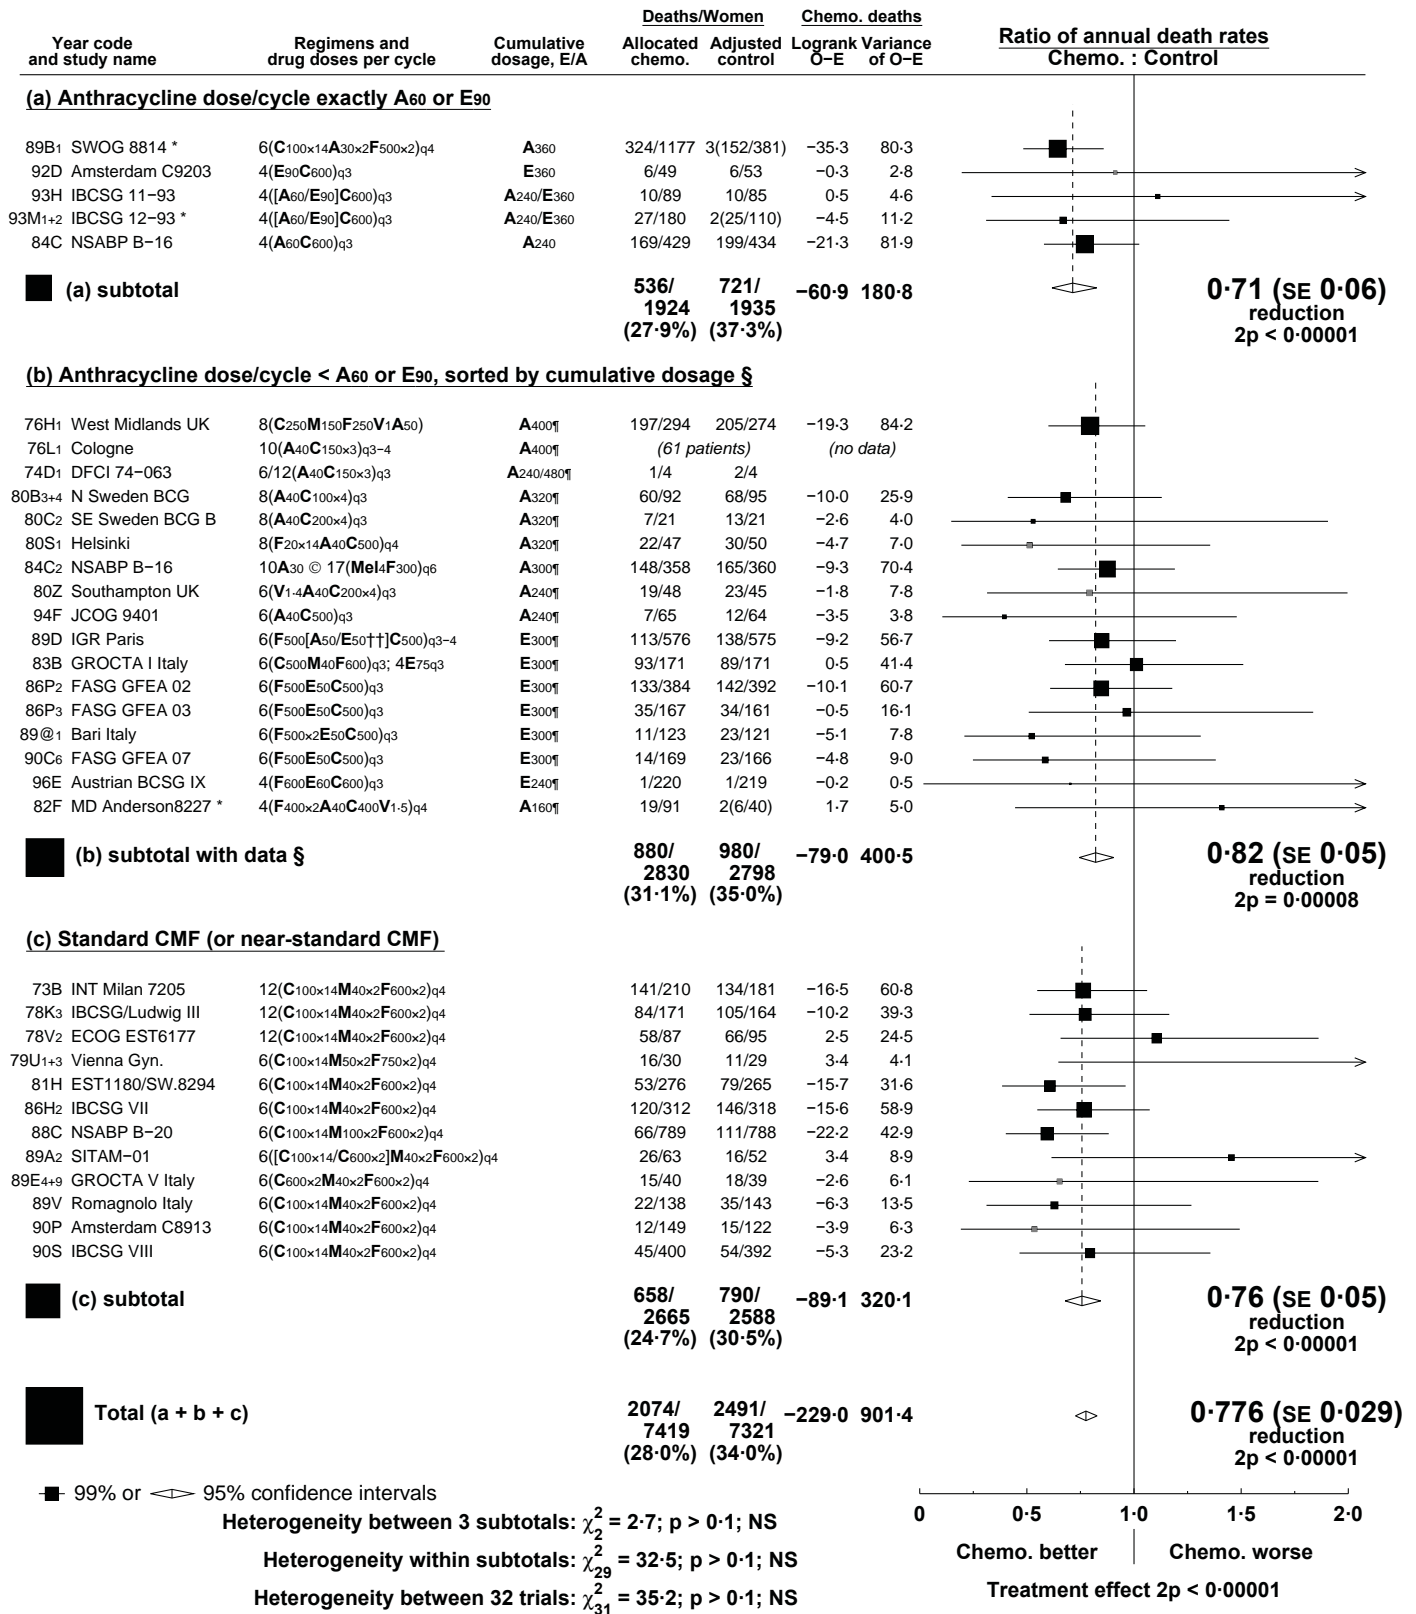

■ 99% or ◊ 95% confidence intervals

Heterogeneity between 3 subtotals:  $\chi^2_2 = 2.7$ ;  $p > 0.1$ ; NS

Heterogeneity within subtotals:  $\chi^2_{29} = 32.5$ ;  $p > 0.1$ ; NS

Heterogeneity between 32 trials:  $\chi^2_{31} = 35.2$ ;  $p > 0.1$ ; NS

§ 1 trial with no data does not contribute to subtotals or to the overall total.

Anthracyclines: **A** = doxorubicin (Adriamycin); **E** = Epirubicin

Other agents: **C** = cyclophosphamide; **F** = fluorouracil; **M** = methotrexate; **Mel** = Melphalan; **V** = vincristine

(Not shown: antibiotic, hormonal, local or steroid therapies)

x2 means d1,8 iv; x4 means d3-6 iv

¶ Dose less than A60 or E90 per cycle

††91% given E, 9% given A

# P 42: MORTALITY WITHOUT RECURRENCE IN FIRST YEAR in trials of anthracycline-based regimen (eg, standard 4AC) or standard CMF (or near-standard CMF) vs. No chemotherapy

| Year code and study name                                                           | Regimens and drug doses per cycle | Cumulative dosage, E/A | Deaths/woman-years               |                                  | Chemo. deaths |                 | Ratio of annual death rates<br>Chemo. : Control         |  |
|------------------------------------------------------------------------------------|-----------------------------------|------------------------|----------------------------------|----------------------------------|---------------|-----------------|---------------------------------------------------------|--|
|                                                                                    |                                   |                        | Allocated chemo.                 | Adjusted control                 | Logrank O-E   | Variance of O-E |                                                         |  |
| <b>(a) Anthracycline dose/cycle exactly A60 or E90</b>                             |                                   |                        |                                  |                                  |               |                 |                                                         |  |
| 89B1 SWOG 8814 *                                                                   | 6(C100x14A30x2F500x2)q4           | A360                   | 11/1154                          | 3(0/363)                         | 2.5           | 1.9             |                                                         |  |
| 92D Amsterdam C9203                                                                | 4(E90C600)q3                      | E360                   | 1/35                             | 1/40                             | 0.1           | 0.5             |                                                         |  |
| 93H IBCSG 11-93                                                                    | 4((A60/E90)C600)q3                | A240/E360              | 0/82                             | 0/79                             |               |                 |                                                         |  |
| 93M1+2 IBCSG 12-93 *                                                               | 4((A60/E90)C600)q3                | A240/E360              | 0/160                            | 2(0/93)                          |               |                 |                                                         |  |
| 84C NSABP B-16                                                                     | 4(A60C600)q3                      | A240                   | 2/402                            | 2/402                            | -0.1          | 1.0             |                                                         |  |
| <b>(a) subtotal</b>                                                                |                                   |                        | <b>14/<br/>1833<br/>(0.8%/y)</b> | <b>3/<br/>1796<br/>(0.2%/y)</b>  | <b>2.5</b>    | <b>3.4</b>      | <b>2.10 (SE 0.81)<br/>increase<br/>2p &gt; 0.1; NS</b>  |  |
| <b>(b) Anthracycline dose/cycle &lt; A60 or E90, sorted by cumulative dosage §</b> |                                   |                        |                                  |                                  |               |                 |                                                         |  |
| 76H1 West Midlands UK                                                              | 8(C250M150F250V1A50)              | A400¶                  | 1/270                            | 0/236                            | 0.5           | 0.2             |                                                         |  |
| 76L1 Cologne                                                                       | 10(A40C150x3)q3-4                 | A400¶                  |                                  |                                  | (no data)     |                 |                                                         |  |
| 74D1 DFCl 74-063                                                                   | 6/12(A40C150x3)q3                 | A240/480¶              |                                  |                                  | (no data)     |                 |                                                         |  |
| 80B3+4 N Sweden BCG                                                                | 8(A40C100x4)q3                    | A320¶                  | 0/81                             | 3/79                             | -1.6          | 0.7             |                                                         |  |
| 80C2 SE Sweden BCG B                                                               | 8(A40C200x4)q3                    | A320¶                  | 1/14                             | 0/13                             | 0.5           | 0.2             |                                                         |  |
| 80S1 Helsinki                                                                      | 8(F20x14A40C500)q4                | A320¶                  | 0/31                             | 0/31                             |               |                 |                                                         |  |
| 84C2 NSABP B-16                                                                    | 10A30 © 17(Mel4F300)q6            | A300¶                  | 1/344                            | 2/338                            | -0.5          | 0.8             |                                                         |  |
| 80Z Southampton UK                                                                 | 6(V1-4A40C200x4)q3                | A240¶                  | 1/34                             | 1/33                             | 0.5           | 0.2             |                                                         |  |
| 94F JCOG 9401                                                                      | 6(A40C500)q3                      | A240¶                  | 0/57                             | 0/58                             |               |                 |                                                         |  |
| 89D IGR Paris                                                                      | 6(F500[A50/E50†]C500)q3-4         | E300¶                  | 4/536                            | 3/529                            | 0.7           | 1.7             |                                                         |  |
| 83B GROCTA I Italy                                                                 | 6(C500M40F600)q3; 4E75q3          | E300¶                  | 0/163                            | 0/155                            |               |                 |                                                         |  |
| 86P2 FASG GFEA 02                                                                  | 6(F500E50C500)q3                  | E300¶                  | 1/343                            | 2/342                            | -0.8          | 0.7             |                                                         |  |
| 86P3 FASG GFEA 03                                                                  | 6(F500E50C500)q3                  | E300¶                  | 0/156                            | 0/147                            |               |                 |                                                         |  |
| 89@1 Bari Italy                                                                    | 6(F500x2E50C500)q3                | E300¶                  | 0/112                            | 0/110                            |               |                 |                                                         |  |
| 90C6 FASG GFEA 07                                                                  | 6(F500E50C500)q3                  | E300¶                  | 0/160                            | 0/156                            |               |                 |                                                         |  |
| 96E Austrian BCSG IX                                                               | 4(F600E60C600)q3                  | E240¶                  | 1/80                             | 0/86                             | 0.6           | 0.2             |                                                         |  |
| 82F MD Anderson8227 *                                                              | 4(F400x2A40C400V1.5)q4            | A160¶                  | 0/82                             | 2(0/28)                          |               |                 |                                                         |  |
| <b>(b) subtotal with data §</b>                                                    |                                   |                        | <b>10/<br/>2463<br/>(0.4%/y)</b> | <b>11/<br/>2369<br/>(0.5%/y)</b> | <b>-0.1</b>   | <b>4.9</b>      | <b>0.97 (SE 0.45)<br/>reduction<br/>2p &gt; 0.1; NS</b> |  |
| <b>(c) Standard CMF (or near-standard CMF)</b>                                     |                                   |                        |                                  |                                  |               |                 |                                                         |  |
| 73B INT Milan 7205                                                                 | 12(C100x14M40x2F600x2)q4          |                        | 1/198                            | 1/160                            | -0.1          | 0.5             |                                                         |  |
| 78K3 IBCSG/Ludwig III                                                              | 12(C100x14M40x2F600x2)q4          |                        | 6/148                            | 1/138                            | 2.5           | 1.7             |                                                         |  |
| 78V2 ECOG EST6177                                                                  | 12(C100x14M40x2F600x2)q4          |                        | 1/78                             | 0/77                             | 0.5           | 0.2             |                                                         |  |
| 79U1+3 Vienna Gyn.                                                                 | 6(C100x14M50x2F750x2)q4           |                        | 0/18                             | 0/19                             |               |                 |                                                         |  |
| 81H EST1180/SW.8294                                                                | 6(C100x14M40x2F600x2)q4           |                        | 3/258                            | 1/248                            | 0.9           | 1.0             |                                                         |  |
| 86H2 IBCSG VII                                                                     | 6(C100x14M40x2F600x2)q4           |                        | 3/292                            | 2/289                            | 0.7           | 1.2             |                                                         |  |
| 88C NSABP B-20                                                                     | 6(C100x14M100x2F600x2)q4          |                        | 1/774                            | 0/777                            | 0.5           | 0.2             |                                                         |  |
| 89A2 SITAM-01                                                                      | 6((C100x14/C600x2)M40x2F600x2)q4  |                        | 0/45                             | 0/39                             |               |                 |                                                         |  |
| 89E+9 GROCTA V Italy                                                               | 6(C600x2M40x2F600x2)q4            |                        | 0/32                             | 0/28                             |               |                 |                                                         |  |
| 89V Romagnolo Italy                                                                | 6(C100x14M40x2F600x2)q4           |                        | 1/132                            | 0/137                            | 0.5           | 0.2             |                                                         |  |
| 90P Amsterdam C8913                                                                | 6(C100x14M40x2F600x2)q4           |                        | 0/141                            | 0/112                            |               |                 |                                                         |  |
| 90S IBCSG VIII                                                                     | 6(C100x14M40x2F600x2)q4           |                        | 0/377                            | 0/371                            |               |                 |                                                         |  |
| <b>(c) subtotal</b>                                                                |                                   |                        | <b>16/<br/>2493<br/>(0.6%/y)</b> | <b>5/<br/>2395<br/>(0.2%/y)</b>  | <b>5.5</b>    | <b>5.2</b>      | <b>2.88 (SE 0.78)<br/>increase<br/>2p = 0.02</b>        |  |
| <b>Total (a + b + c)</b>                                                           |                                   |                        | <b>40/<br/>6789<br/>(0.6%/y)</b> | <b>19/<br/>6560<br/>(0.3%/y)</b> | <b>7.8</b>    | <b>13.4</b>     | <b>1.792 (SE 0.371)<br/>increase<br/>2p = 0.03</b>      |  |

■ 99% or ◁ 95% confidence intervals

Heterogeneity between 3 subtotals:  $\chi^2_2 = 3.1$ ;  $p > 0.1$ ; NS

Heterogeneity within subtotals:  $\chi^2_{15} = 12.9$ ;  $p > 0.1$ ; NS

Heterogeneity between 18 trials:  $\chi^2_{17} = 16.0$ ;  $p > 0.1$ ; NS

§ 2 trials with no data do not contribute to subtotals or to the overall total.

Anthracyclines: **A** = doxorubicin (Adriamycin); **E** = Epirubicin

Other agents: **C** = cyclophosphamide; **F** = fluorouracil; **M** = methotrexate; **Mel** = Melphalan; **V** = vincristine

(Not shown: antibiotic, hormonal, local or steroid therapies)

x2 means d1,8 iv; x4 means d3-6 iv

¶ Dose less than A60 or E90 per cycle

††91% given E, 9% given A

0 0.5 1.0 1.5 2.0  
Chemo. better | Chemo. worse  
Treatment effect 2p = 0.03, adverse

# P 43: MORTALITY WITHOUT RECURRENCE in trials of anthracycline-based regimen (eg, standard 4AC) or standard CMF (or near-standard CMF) vs. No chemotherapy

| Year code and study name                                                           | Regimens and drug doses per cycle | Cumulative dosage, E/A | Deaths/woman-years    |                       | Chemo. deaths |                 | Ratio of annual death rates<br>Chemo. : Control     |                                                        |
|------------------------------------------------------------------------------------|-----------------------------------|------------------------|-----------------------|-----------------------|---------------|-----------------|-----------------------------------------------------|--------------------------------------------------------|
|                                                                                    |                                   |                        | Allocated chemo.      | Adjusted control      | Logrank O-E   | Variance of O-E |                                                     |                                                        |
| <b>(a) Anthracycline dose/cycle exactly A60 or E90</b>                             |                                   |                        |                       |                       |               |                 |                                                     |                                                        |
| 89B1 SWOG 8814 *                                                                   | 6(C100x14A30x2F500x2)q4           | A360                   | 162/10308             | 3(33/3065)            | 11.9          | 33.3            |                                                     |                                                        |
| 92D Amsterdam C9203                                                                | 4(E90C600)q3                      | E360                   | 2/177                 | 2/174                 | 0.2           | 0.9             |                                                     |                                                        |
| 93H IBCSG 11-93                                                                    | 4((A60/E90)C600)q3                | A240/E360              | 0/628                 | 1/608                 | -0.4          | 0.2             |                                                     |                                                        |
| 93M1+2 IBCSG 12-93 *                                                               | 4((A60/E90)C600)q3                | A240/E360              | 8/1353                | 2(1/684)              | 2.4           | 1.7             |                                                     |                                                        |
| 84C NSABP B-16                                                                     | 4(A60C600)q3                      | A240                   | 61/4101               | 51/3632               | 0.7           | 24.7            |                                                     |                                                        |
| ■ (a) subtotal                                                                     |                                   |                        | <b>233/<br/>16567</b> | <b>155/<br/>14977</b> | <b>14.8</b>   | <b>60.9</b>     | <b>1.27 (SE 0.14)<br/>increase<br/>2p = 0.06</b>    |                                                        |
| <b>(b) Anthracycline dose/cycle &lt; A60 or E90, sorted by cumulative dosage §</b> |                                   |                        |                       |                       |               |                 |                                                     |                                                        |
| 76H1 West Midlands UK                                                              | 8(C250M150F250V1A50)              | A400¶                  | 6/2324                | 4/1691                | 0.3           | 2.4             |                                                     |                                                        |
| 76L1 Cologne                                                                       | 10(A40C150x3)q3-4                 | A400¶                  |                       |                       |               | (no data)       |                                                     |                                                        |
| 74D1 DFCI 74-063                                                                   | 6/12(A40C150x3)q3                 | A240/480¶              | 2/46                  | 1/16                  |               |                 |                                                     |                                                        |
| 80B3+4 N Sweden BCG                                                                | 8(A40C100x4)q3                    | A320¶                  | 14/721                | 11/616                | 1.3           | 5.6             |                                                     |                                                        |
| 80C2 SE Sweden BCG B                                                               | 8(A40C200x4)q3                    | A320¶                  | 7/272                 | 3/187                 | 1.2           | 1.2             |                                                     |                                                        |
| 80S1 Helsinki                                                                      | 8(F20x14A40C500)q4                | A320¶                  | 2/308                 | 6/249                 | -0.2          | 0.4             |                                                     |                                                        |
| 84C2 NSABP B-16                                                                    | 10A30 @ 17(Mel4F300)q6            | A300¶                  | 46/3330               | 43/2948               | -0.1          | 20.5            |                                                     |                                                        |
| 80Z Southampton UK                                                                 | 6(V1.4A40C200x4)q3                | A240¶                  | 5/452                 | 2/391                 | 1.9           | 1.4             |                                                     |                                                        |
| 94F JCOG 9401                                                                      | 6(A40C500)q3                      | A240¶                  | 1/235                 | 2/210                 | 0.1           | 0.5             |                                                     |                                                        |
| 89D IGR Paris                                                                      | 6(F500[A50/E50††]C500)q3-4        | E300¶                  | 25/4401               | 21/4116               | 2.1           | 11.2            |                                                     |                                                        |
| 83B GROCTA I Italy                                                                 | 6(C500M40F600)q3; 4E75q3          | E300¶                  | 1/1668                | 0/1526                | 0.5           | 0.2             |                                                     |                                                        |
| 86P2 FASG GFEA 02                                                                  | 6(F500E50C500)q3                  | E300¶                  | 13/2780               | 20/2619               | -3.8          | 7.2             |                                                     |                                                        |
| 86P3 FASG GFEA 03                                                                  | 6(F500E50C500)q3                  | E300¶                  | 9/1185                | 6/1078                | 1.6           | 3.7             |                                                     |                                                        |
| 89@1 Bari Italy                                                                    | 6(F500x2E50C500)q3                | E300¶                  | 5/1058                | 6/1090                | 1.3           | 2.0             |                                                     |                                                        |
| 90C6 FASG GFEA 07                                                                  | 6(F500E50C500)q3                  | E300¶                  | 5/1134                | 3/1010                | 0.4           | 1.8             |                                                     |                                                        |
| 96E Austrian BCSG IX                                                               | 4(F600E60C600)q3                  | E240¶                  | 1/212                 | 1/217                 | 0.5           | 0.3             |                                                     |                                                        |
| 82F MD Anderson8227 *                                                              | 4(F400x2A40C400V1.5)q4            | A160¶                  | 2/596                 | 2(2/259)              | 0.0           | 0.6             |                                                     |                                                        |
| ■ (b) subtotal with data §                                                         |                                   |                        | <b>144/<br/>20722</b> | <b>133/<br/>18482</b> | <b>7.0</b>    | <b>59.2</b>     |                                                     | <b>1.13 (SE 0.14)<br/>increase<br/>2p &gt; 0.1; NS</b> |
| <b>(c) Standard CMF (or near-standard CMF)</b>                                     |                                   |                        |                       |                       |               |                 |                                                     |                                                        |
| 73B INT Milan 7205                                                                 | 12(C100x14M40x2F600x2)q4          |                        | 24/2210               | 19/1472               | 0.7           | 8.2             |                                                     |                                                        |
| 78K3 IBCSG/Ludwig III                                                              | 12(C100x14M40x2F600x2)q4          |                        | 37/1558               | 20/1235               | 4.0           | 11.6            |                                                     |                                                        |
| 78V2 ECOG EST6177                                                                  | 12(C100x14M40x2F600x2)q4          |                        | 8/559                 | 7/622                 | 1.8           | 3.0             |                                                     |                                                        |
| 79U1+3 Vienna Gyn.                                                                 | 6(C100x14M50x2F750x2)q4           |                        | 4/250                 | 10/266                | 0.7           | 1.0             |                                                     |                                                        |
| 81H EST1180/SW.8294                                                                | 6(C100x14M40x2F600x2)q4           |                        | 31/3385               | 25/2758               | 0.7           | 12.5            |                                                     |                                                        |
| 86H2 IBCSG VII                                                                     | 6(C100x14M40x2F600x2)q4           |                        | 40/2554               | 28/2359               | 5.9           | 16.0            |                                                     |                                                        |
| 88C NSABP B-20                                                                     | 6(C100x14M100x2F600x2)q4          |                        | 54/9087               | 51/8706               | 2.1           | 25.9            |                                                     |                                                        |
| 89A2 SITAM-01                                                                      | 6((C100x14/C600x2)M40x2F600x2)q4  |                        | 5/370                 | 3/364                 | -0.2          | 1.3             |                                                     |                                                        |
| 89E4+9 GROCTA V Italy                                                              | 6(C600x2M40x2F600x2)q4            |                        | 0/215                 | 1/167                 | -0.6          | 0.2             |                                                     |                                                        |
| 89V Romagnolo Italy                                                                | 6(C100x14M40x2F600x2)q4           |                        | 8/1358                | 4/1283                | 1.8           | 2.9             |                                                     |                                                        |
| 90P Amsterdam C8913                                                                | 6(C100x14M40x2F600x2)q4           |                        | 0/630                 | 0/448                 |               |                 |                                                     |                                                        |
| 90S IBCSG VIII                                                                     | 6(C100x14M40x2F600x2)q4           |                        | 4/3305                | 2/3063                | 1.4           | 1.4             |                                                     |                                                        |
| ■ (c) subtotal                                                                     |                                   |                        | <b>215/<br/>25481</b> | <b>170/<br/>22743</b> | <b>18.1</b>   | <b>84.0</b>     | <b>1.24 (SE 0.12)<br/>increase<br/>2p = 0.05</b>    |                                                        |
| ■ Total (a + b + c)                                                                |                                   |                        | <b>592/<br/>62770</b> | <b>458/<br/>56202</b> | <b>39.9</b>   | <b>204.1</b>    | <b>1.216 (SE 0.077)<br/>increase<br/>2p = 0.005</b> |                                                        |

■ 99% or ◁ 95% confidence intervals

Heterogeneity between 3 subtotals:  $\chi^2_2 = 0.5$ ;  $p > 0.1$ ; NS

Heterogeneity within subtotals:  $\chi^2_{28} = 19.1$ ;  $p > 0.1$ ; NS

Heterogeneity between 31 trials:  $\chi^2_{30} = 19.7$ ;  $p > 0.1$ ; NS

§ 1 trial with no data does not contribute to subtotals or to the overall total.

Anthracyclines: **A** = doxorubicin (Adriamycin); **E** = Epirubicin

Other agents: **C** = cyclophosphamide; **F** = fluorouracil; **M** = methotrexate; **Mel** = Melphalan; **V** = vincristine

(Not shown: antibiotic, hormonal, local or steroid therapies)

x2 means d1,8 iv; x4 means d3-6 iv

¶ Dose less than A60 or E90 per cycle

††91% given E, 9% given A

0 0.5 1.0 1.5 2.0  
Chemo. better | Chemo. worse  
Treatment effect 2p = 0.005, adverse

# P 44: OVERALL MORTALITY in trials of anthracycline-based regimen (eg, standard 4AC) or standard CMF (or near-standard CMF) vs. No chemotherapy

| Year code and study name                                                           | Regimens and drug doses per cycle | Cumulative dosage, E/A | Deaths/Women                      |                                   | Chemo. deaths |                 | Ratio of annual death rates<br>Chemo. : Control           |                                                     |
|------------------------------------------------------------------------------------|-----------------------------------|------------------------|-----------------------------------|-----------------------------------|---------------|-----------------|-----------------------------------------------------------|-----------------------------------------------------|
|                                                                                    |                                   |                        | Allocated chemo.                  | Adjusted control                  | Logrank O-E   | Variance of O-E |                                                           |                                                     |
| <b>(a) Anthracycline dose/cycle exactly A60 or E90</b>                             |                                   |                        |                                   |                                   |               |                 |                                                           |                                                     |
| 89B1 SWOG 8814 *                                                                   | 6(C100x14A30x2F500x2)q4           | A360                   | 486/1177                          | 3(185/381)                        | -23.5         | 113.7           |                                                           |                                                     |
| 92D Amsterdam C9203                                                                | 4(E90C600)q3                      | E360                   | 8/49                              | 8/53                              | 0.0           | 3.8             |                                                           |                                                     |
| 93H IBCSG 11-93                                                                    | 4((A60/E90)C600)q3                | A240/E360              | 10/89                             | 11/85                             | 0.0           | 4.9             |                                                           |                                                     |
| 93M1+2 IBCSG 12-93 *                                                               | 4((A60/E90)C600)q3                | A240/E360              | 35/180                            | 2(26/110)                         | -2.1          | 12.9            |                                                           |                                                     |
| 84C NSABP B-16                                                                     | 4(A60C600)q3                      | A240                   | 230/429                           | 250/434                           | -20.7         | 106.6           |                                                           |                                                     |
| <b>(a) subtotal</b>                                                                |                                   |                        | <b>769/<br/>1924<br/>(40.0%)</b>  | <b>876/<br/>1935<br/>(45.3%)</b>  | <b>-46.2</b>  | <b>241.7</b>    | <b>0.83 (SE 0.06)<br/>reduction<br/>2p = 0.003</b>        |                                                     |
| <b>(b) Anthracycline dose/cycle &lt; A60 or E90, sorted by cumulative dosage §</b> |                                   |                        |                                   |                                   |               |                 |                                                           |                                                     |
| 76H1 West Midlands UK                                                              | 8(C250M150F250V1A50)              | A400†                  | 203/294                           | 209/274                           | -19.0         | 86.6            |                                                           |                                                     |
| 76L1 Cologne                                                                       | 10(A40C150x3)q3-4                 | A400†                  | (61 patients)                     |                                   | (no data)     |                 |                                                           |                                                     |
| 74D1 DFCl 74-063                                                                   | 6/12(A40C150x3)q3                 | A240/480†              | 3/4                               | 3/4                               |               |                 |                                                           |                                                     |
| 80B3+4 N Sweden BCG                                                                | 8(A40C100x4)q3                    | A320†                  | 74/92                             | 79/95                             | -8.6          | 31.6            |                                                           |                                                     |
| 80C2 SE Sweden BCG B                                                               | 8(A40C200x4)q3                    | A320†                  | 14/21                             | 16/21                             | -1.4          | 5.2             |                                                           |                                                     |
| 80S1 Helsinki                                                                      | 8(F20x14A40C500)q4                | A320†                  | 24/47                             | 36/50                             | -4.9          | 7.5             |                                                           |                                                     |
| 84C2 NSABP B-16                                                                    | 10(A30 @ 17(Mel4F300)q6           | A300†                  | 194/358                           | 208/360                           | -9.4          | 90.8            |                                                           |                                                     |
| 80Z Southampton UK                                                                 | 6(V1.4A40C200x4)q3                | A240†                  | 24/48                             | 25/45                             | 0.0           | 9.2             |                                                           |                                                     |
| 94F JCOG 9401                                                                      | 6(A40C500)q3                      | A240†                  | 8/65                              | 14/64                             | -3.5          | 4.3             |                                                           |                                                     |
| 89D IGR Paris                                                                      | 6(F500[A50/E50††]C500)q3-4        | E300†                  | 138/576                           | 159/575                           | -7.1          | 67.9            |                                                           |                                                     |
| 83B GROCTA I Italy                                                                 | 6(C500M40F600)q3; 4E75q3          | E300†                  | 94/171                            | 89/171                            | 0.9           | 41.6            |                                                           |                                                     |
| 86P2 FASG GFEA 02                                                                  | 6(F500E50C500)q3                  | E300†                  | 146/384                           | 162/392                           | -13.9         | 67.9            |                                                           |                                                     |
| 86P3 FASG GFEA 03                                                                  | 6(F500E50C500)q3                  | E300†                  | 44/167                            | 40/161                            | 1.0           | 19.8            |                                                           |                                                     |
| 89@1 Bari Italy                                                                    | 6(F500x2E50C500)q3                | E300†                  | 16/123                            | 29/121                            | -3.8          | 9.9             |                                                           |                                                     |
| 90C6 FASG GFEA 07                                                                  | 6(F500E50C500)q3                  | E300†                  | 19/169                            | 26/166                            | -4.4          | 10.8            |                                                           |                                                     |
| 96E Austrian BCSG IX                                                               | 4(F600E60C600)q3                  | E240†                  | 2/220                             | 2/219                             | 0.3           | 0.8             |                                                           |                                                     |
| 82F MD Anderson8227 *                                                              | 4(F400x2A40C400V1.5)q4            | A160†                  | 21/91                             | 2(8/40)                           | 1.7           | 5.6             |                                                           |                                                     |
| <b>(b) subtotal with data §</b>                                                    |                                   |                        | <b>1024/<br/>2830<br/>(36.2%)</b> | <b>1113/<br/>2798<br/>(39.8%)</b> | <b>-72.0</b>  | <b>459.6</b>    |                                                           | <b>0.86 (SE 0.04)<br/>reduction<br/>2p = 0.0008</b> |
| <b>(c) Standard CMF (or near-standard CMF)</b>                                     |                                   |                        |                                   |                                   |               |                 |                                                           |                                                     |
| 73B INT Milan 7205                                                                 | 12(C100x14M40x2F600x2)q4          |                        | 165/210                           | 153/181                           | -15.8         | 69.0            |                                                           |                                                     |
| 78K3 IBCSG/Ludwig III                                                              | 12(C100x14M40x2F600x2)q4          |                        | 121/171                           | 125/164                           | -6.1          | 50.9            |                                                           |                                                     |
| 78V2 ECOG EST6177                                                                  | 12(C100x14M40x2F600x2)q4          |                        | 66/87                             | 73/95                             | 4.3           | 27.5            |                                                           |                                                     |
| 79U1+3 Vienna Gyn.                                                                 | 6(C100x14M50x2F750x2)q4           |                        | 20/30                             | 21/29                             | 4.1           | 5.1             |                                                           |                                                     |
| 81H EST1180/SW.8294                                                                | 6(C100x14M40x2F600x2)q4           |                        | 84/276                            | 104/265                           | -15.0         | 44.1            |                                                           |                                                     |
| 86H2 IBCSG VII                                                                     | 6(C100x14M40x2F600x2)q4           |                        | 160/312                           | 174/318                           | -9.7          | 74.9            |                                                           |                                                     |
| 88C NSABP B-20                                                                     | 6(C100x14M100x2F600x2)q4          |                        | 120/789                           | 162/788                           | -20.2         | 68.7            |                                                           |                                                     |
| 89A2 SITAM-01                                                                      | 6((C100x14/C600x2)M40x2F600x2)q4  |                        | 31/63                             | 19/52                             | 3.1           | 10.3            |                                                           |                                                     |
| 89E4+9 GROCTA V Italy                                                              | 6(C600x2M40x2F600x2)q4            |                        | 15/40                             | 19/39                             | -3.2          | 6.3             |                                                           |                                                     |
| 89V Romagnolo Italy                                                                | 6(C100x14M40x2F600x2)q4           |                        | 30/138                            | 39/143                            | -4.5          | 16.4            |                                                           |                                                     |
| 90P Amsterdam C8913                                                                | 6(C100x14M40x2F600x2)q4           |                        | 12/149                            | 15/122                            | -3.9          | 6.3             |                                                           |                                                     |
| 90S IBCSG VIII                                                                     | 6(C100x14M40x2F600x2)q4           |                        | 49/400                            | 56/392                            | -4.0          | 24.6            |                                                           |                                                     |
| <b>(c) subtotal</b>                                                                |                                   |                        | <b>873/<br/>2665<br/>(32.8%)</b>  | <b>960/<br/>2588<br/>(37.1%)</b>  | <b>-70.9</b>  | <b>404.1</b>    | <b>0.84 (SE 0.05)<br/>reduction<br/>2p = 0.0004</b>       |                                                     |
| <b>Total (a + b + c)</b>                                                           |                                   |                        | <b>2666/<br/>7419<br/>(35.9%)</b> | <b>2949/<br/>7321<br/>(40.3%)</b> | <b>-189.1</b> | <b>1105.5</b>   | <b>0.843 (SE 0.028)<br/>reduction<br/>2p &lt; 0.00001</b> |                                                     |

■ 99% or ◊ 95% confidence intervals

Heterogeneity between 3 subtotals:  $\chi^2_2 = 0.2$ ;  $p > 0.1$ ; NS

Heterogeneity within subtotals:  $\chi^2_{29} = 25.5$ ;  $p > 0.1$ ; NS

Heterogeneity between 32 trials:  $\chi^2_{31} = 25.7$ ;  $p > 0.1$ ; NS

§ 1 trial with no data does not contribute to subtotals or to the overall total.

Anthracyclines: **A** = doxorubicin (Adriamycin); **E** = Epirubicin

Other agents: **C** = cyclophosphamide; **F** = fluorouracil; **M** = methotrexate; **Mel** = Melphalan; **V** = vincristine

(Not shown: antibiotic, hormonal, local or steroid therapies)

x2 means d1,8 iv; x4 means d3-6 iv

† Dose less than A60 or E90 per cycle

†† 91% given E, 9% given A

0 0.5 1.0 1.5 2.0  
Chemo. better | Chemo. worse  
Treatment effect 2p < 0.00001

## P 45: EARLY RECURRENCE (first 5 years) in trials of anthracycline dosage

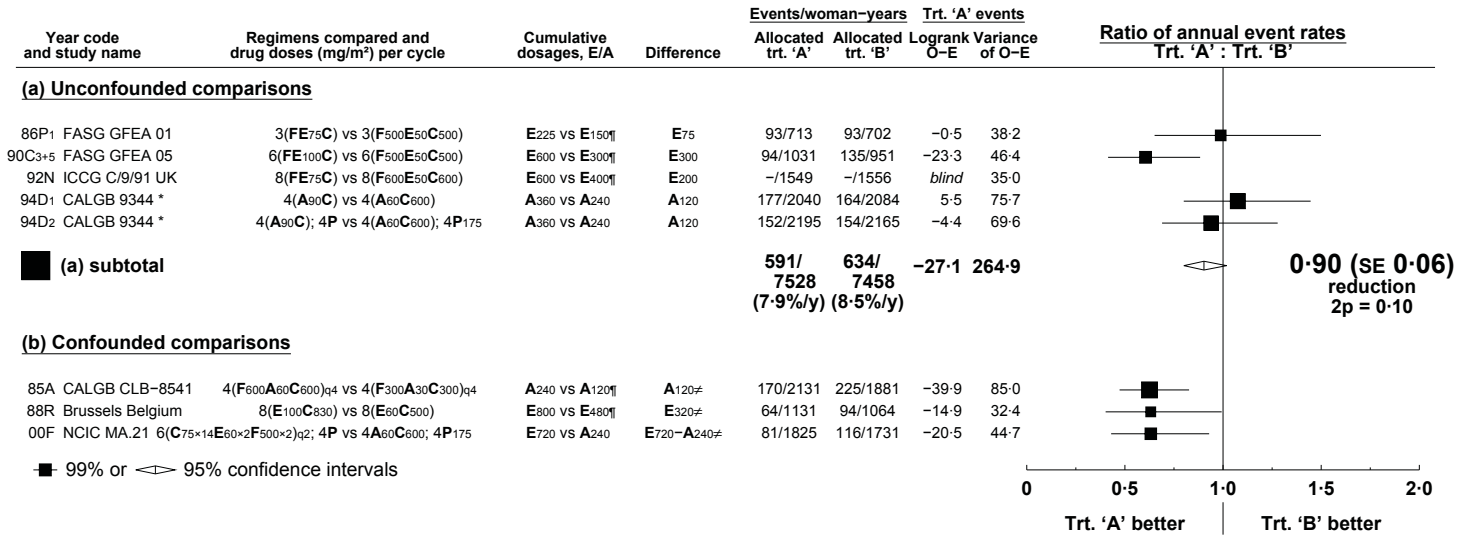

■ 99% or ◊ 95% confidence intervals

Anthracyclines: **A** = doxorubicin (Adriamycin); **E** = Epirubicin

Other agents: **C** = cyclophosphamide; **F** = fluorouracil; **P** = paclitaxel

(Not shown: antibiotic, hormonal, local or steroid therapies)

All regimens q3w (unless specified as q4). Semicolon [:] indicates treatment sequence

x2 means d1,8 iv; x4 means d3-6 iv

¶ Dose less than E90 or A60 per q3w (E120 or A75 per q4w) cycle

≠ Taxane and control regimens differ in ways other than cumulative anthracycline dose

\* These analyses compare the highest and lowest of the 3 anthracycline doses studied in 94D CALGB 9344, ignoring the middle dose

## P 46: RECURRENCE in trials of anthracycline dosage

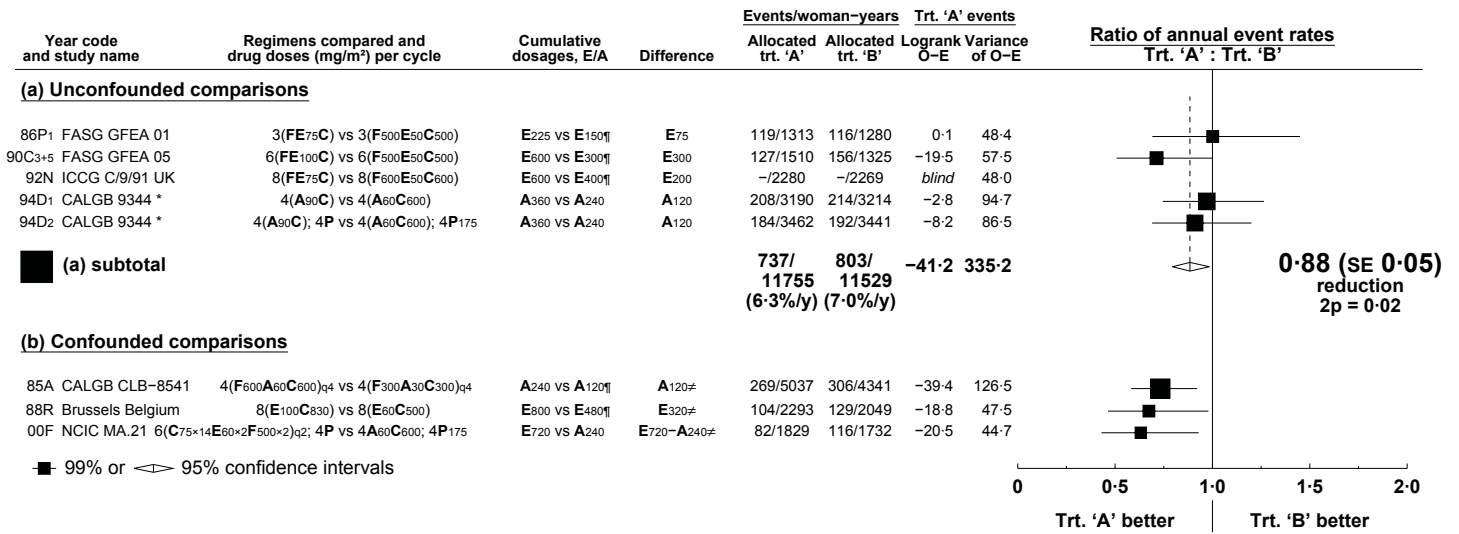

■ 99% or ◁▷ 95% confidence intervals

Anthracyclines: **A** = doxorubicin (Adriamycin); **E** = Epirubicin

Other agents: **C** = cyclophosphamide; **F** = fluorouracil; **P** = paclitaxel

(Not shown: antibiotic, hormonal, local or steroid therapies)

All regimens q3w (unless specified as q4). Semicolon [;] indicates treatment sequence

x2 means d1,8 iv; x4 means d3-6 iv

¶ Dose less than E90 or A60 per q3w (E120 or A75 per q4w) cycle

≠ Taxane and control regimens differ in ways other than cumulative anthracycline dose

\* These analyses compare the highest and lowest of the 3 anthracycline doses studied in 94D CALGB 9344, ignoring the middle dose

# P 47: BREAST CANCER MORTALITY (MORTALITY WITH RECURRENCE) in trials of anthracycline dosage

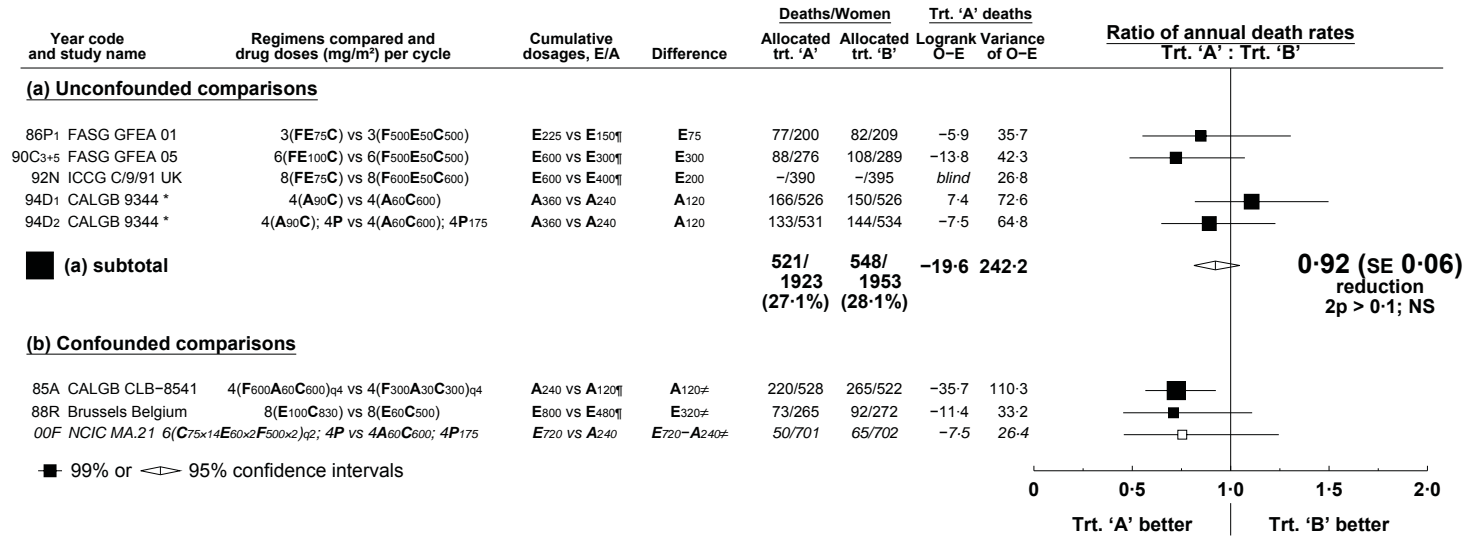

Anthracyclines: **A** = doxorubicin (Adriamycin); **E** = Epirubicin

Other agents: **C** = cyclophosphamide; **F** = fluorouracil; **P** = paclitaxel

(Not shown: antibiotic, hormonal, local or steroid therapies)

All regimens q3w (unless specified as q4). Semicolon [:] indicates treatment sequence

x2 means d1,8 iv; x4 means d3-6 iv

¶ Dose less than E90 or A60 per q3w (E120 or A75 per q4w) cycle

≠ Taxane and control regimens differ in ways other than cumulative anthracycline dose

\* These analyses compare the highest and lowest of the 3 anthracycline doses studied in 94D CALGB 9344, ignoring the middle dose



## P 48: MORTALITY WITHOUT RECURRENCE IN FIRST YEAR in trials of anthracycline dosage

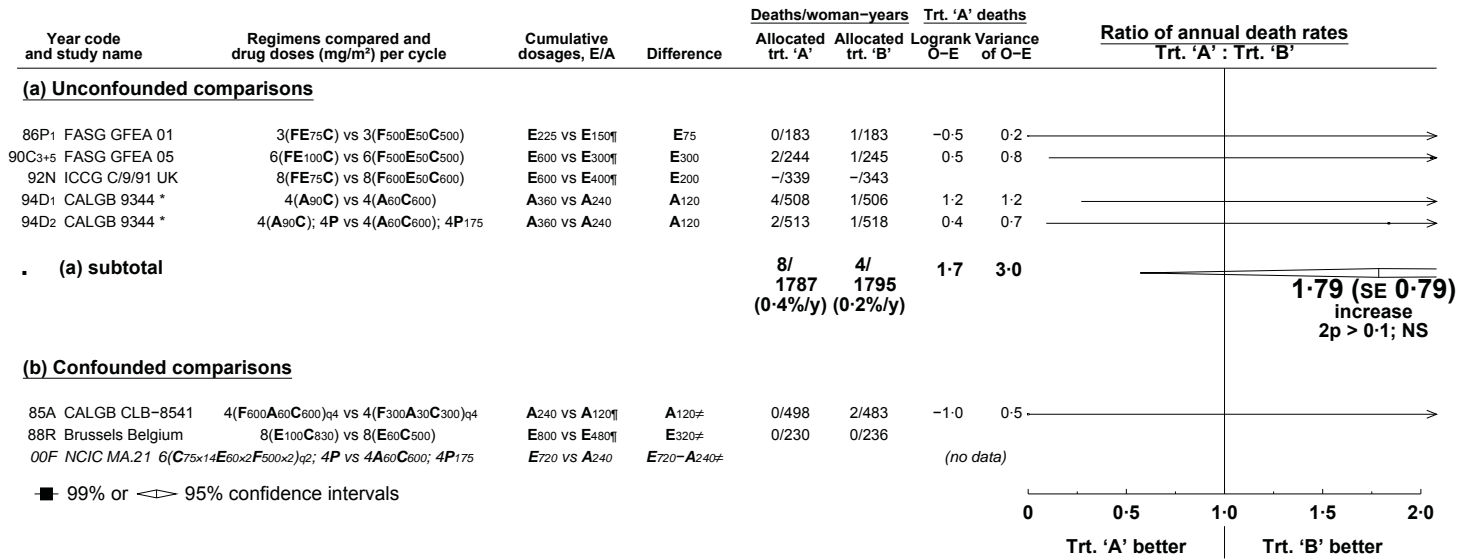

§ 1 trial with no data does not contribute to subtotals or to the overall total.

Anthracyclines: **A** = doxorubicin (Adriamycin); **E** = Epirubicin

Other agents: **C** = cyclophosphamide; **F** = fluorouracil; **P** = paclitaxel

(Not shown: antibiotic, hormonal, local or steroid therapies)

All regimens q3w (unless specified as q4). Semicolon [:] indicates treatment sequence

×2 means d1,8 iv; ×4 means d3-6 iv

¶ Dose less than E90 or A60 per q3w (E120 or A75 per q4w) cycle

≠ Taxane and control regimens differ in ways other than cumulative anthracycline dose

\* These analyses compare the highest and lowest of the 3 anthracycline doses studied in 94D CALGB 9344, ignoring the middle dose

## P 49: MORTALITY WITHOUT RECURRENCE in trials of anthracycline dosage

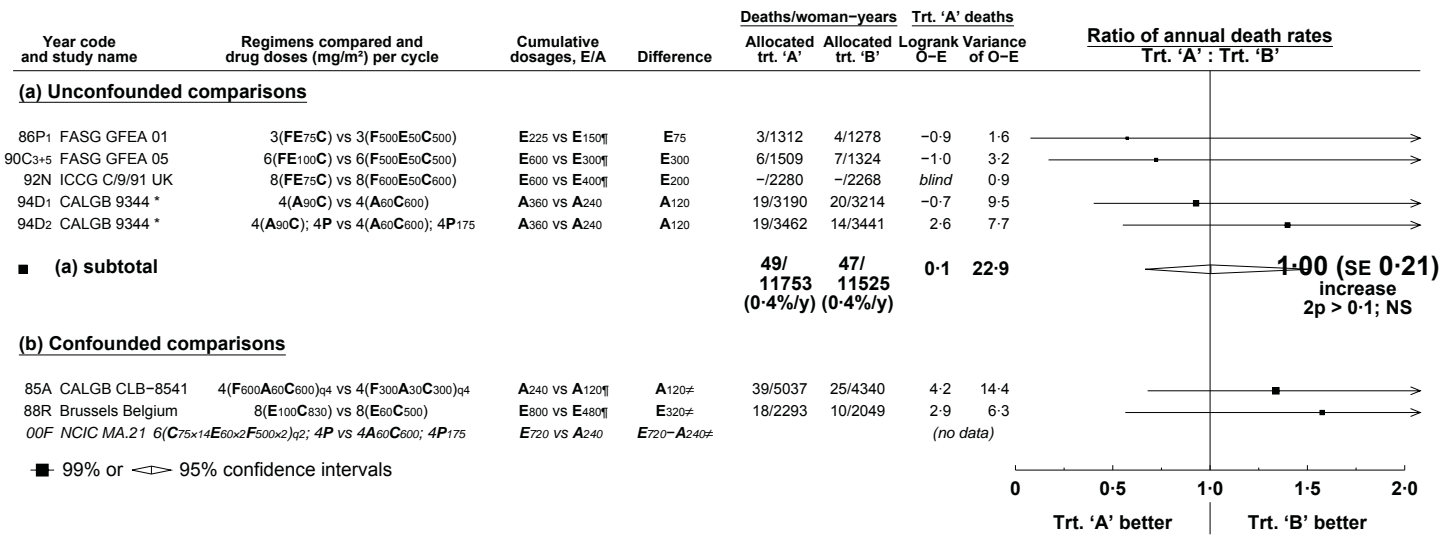

§ 1 trial with no data does not contribute to subtotals or to the overall total.

Anthracyclines: **A** = doxorubicin (Adriamycin); **E** = Epirubicin

Other agents: **C** = cyclophosphamide; **F** = fluorouracil; **P** = paclitaxel

(Not shown: antibiotic, hormonal, local or steroid therapies)

All regimens q3w (unless specified as q4). Semicolon [:] indicates treatment sequence

x2 means d1,8 iv; x4 means d3-6 iv

¶ Dose less than E90 or A60 per q3w (E120 or A75 per q4w) cycle

≠ Taxane and control regimens differ in ways other than cumulative anthracycline dose

\* These analyses compare the highest and lowest of the 3 anthracycline doses studied in 94D CALGB 9344, ignoring the middle dose

## P 50: OVERALL MORTALITY in trials of anthracycline dosage

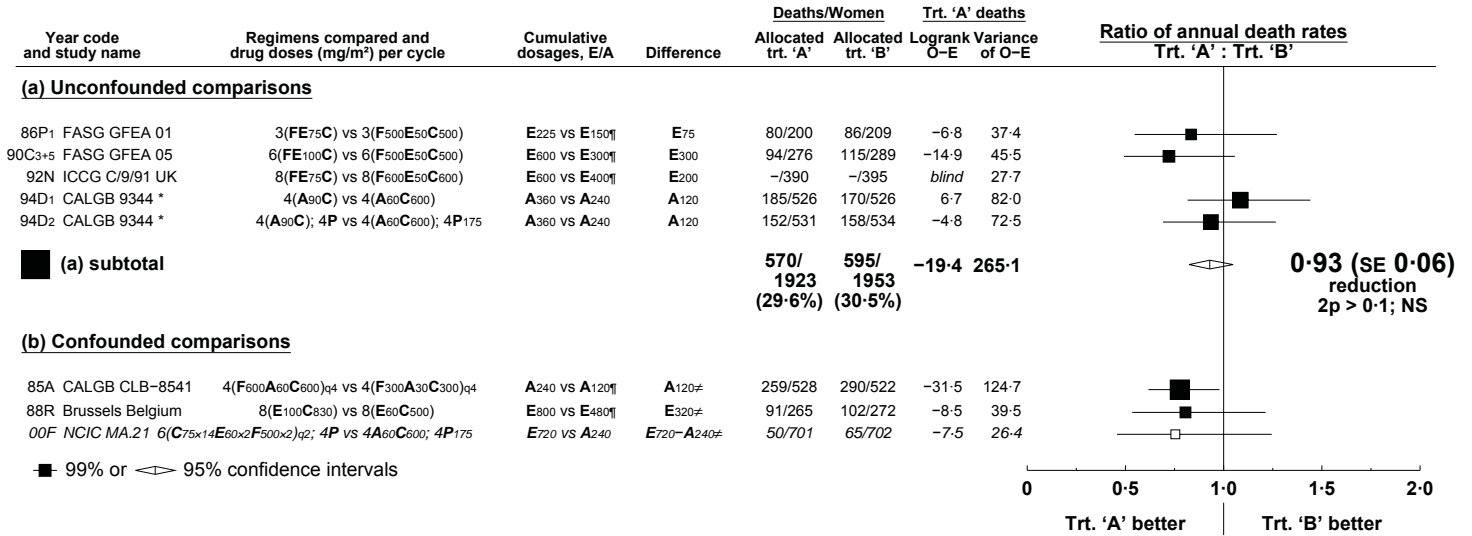

Anthracyclines: **A** = doxorubicin (Adriamycin); **E** = Epirubicin

Other agents: **C** = cyclophosphamide; **F** = fluorouracil; **P** = paclitaxel

(Not shown: antibiotic, hormonal, local or steroid therapies)

All regimens q3w (unless specified as q4). Semicolon [:] indicates treatment sequence

x2 means d1,8 iv; x4 means d3-6 iv

¶ Dose less than E90 or A60 per q3w (E120 or A75 per q4w) cycle

≠ Taxane and control regimens differ in ways other than cumulative anthracycline dose

\* These analyses compare the highest and lowest of the 3 anthracycline doses studied in 94D CALGB 9344, ignoring the middle dose

# P 51: EARLY RECURRENCE (first 5 years) in trials of CMF regimen vs. No chemotherapy

| Year code and study name                                | CMF regimens and doses per cycle     | Events/woman-years |                   | CMF events    |                 | Ratio of annual event rates<br>CMF : Control                   |                                                              |  |
|---------------------------------------------------------|--------------------------------------|--------------------|-------------------|---------------|-----------------|----------------------------------------------------------------|--------------------------------------------------------------|--|
|                                                         |                                      | Allocated CMF      | Adjusted control  | Logrank O-E   | Variance of O-E |                                                                |                                                              |  |
| <b>(a) Standard CMF (or near-standard CMF) regimens</b> |                                      |                    |                   |               |                 |                                                                |                                                              |  |
| 73B INT Milan 7205                                      | 12(C100×14M40×2F600×2)q4             | 95/787             | 98/555            | -18.7         | 38.5            |                                                                |                                                              |  |
| 78K3 IBCSG/Ludwig III                                   | 12(C100×14M40×2F600×2)q4             | 59/608             | 88/488            | -17.6         | 29.3            |                                                                |                                                              |  |
| 78V2 ECOG EST6177                                       | 12(C100×14M40×2F600×2)q4             | 52/264             | 57/268            | -2.7          | 20.3            |                                                                |                                                              |  |
| 79U1+3 Vienna Gyn.                                      | 6(C100×14M50×2F750×2)q4              | 14/109             | 9/108             | 2.1           | 3.5             |                                                                |                                                              |  |
| 81H EST1180/SW.8294                                     | 6(C100×14M40×2F600×2)q4              | 53/1153            | 89/1009           | -21.6         | 32.7            |                                                                |                                                              |  |
| 86H2 IBCSG VII                                          | 6(C100×14M40×2F600×2)q4              | 96/1248            | 126/1177          | -18.7         | 47.9            |                                                                |                                                              |  |
| 88C NSABP B-20                                          | 6(C100×14M100×2F600×2)q4             | 48/3756            | 95/3681           | -24.6         | 34.7            |                                                                |                                                              |  |
| 89A2 SITAM-01                                           | 6((C100×14/C600×2)M40×2F600×2)q4     | 26/208             | 19/185            | 1.6           | 9.1             |                                                                |                                                              |  |
| 89E4+9 GROCTA V Italy                                   | 6(C600×2M40×2F600×2)q4               | 14/152             | 20/124            | -2.9          | 6.2             |                                                                |                                                              |  |
| 89V Romagnolo Italy                                     | 6(C100×14M40×2F600×2)q4              | 23/621             | 38/603            | -7.4          | 14.3            |                                                                |                                                              |  |
| 90P Amsterdam C8913                                     | 6(C100×14M40×2F600×2)q4              | 20/542             | 27/398            | -7.0          | 10.6            |                                                                |                                                              |  |
| 90S IBCSG VIII                                          | 6(C100×14M40×2F600×2)q4              | 49/1834            | 82/1721           | -18.0         | 30.1            |                                                                |                                                              |  |
| <b>(a) subtotal</b>                                     |                                      | <b>549/11282</b>   | <b>748/10317</b>  | <b>-135.5</b> | <b>277.0</b>    |                                                                | <b>0.61 (SE 0.05)</b><br>reduction<br><b>2p &lt; 0.00001</b> |  |
| <b>(b) Other CMF regimens</b>                           |                                      |                    |                   |               |                 |                                                                |                                                              |  |
| 75E2 Manchester I                                       | 12(C80×14M32×2F480×2)q4              | 23/195             | 24/173            | -1.5          | 8.3             |                                                                |                                                              |  |
| 76C Glasgow                                             | 12(C300×2M40×2F600×2)q4              | 53/384             | 62/279            | -12.9         | 19.4            |                                                                |                                                              |  |
| 76E EORTC 09771                                         | 24(C50×14M15×2F350×2)q4              | 92/869             | 109/765           | -14.4         | 43.0            |                                                                |                                                              |  |
| 77B1+2 Danish BCG 77b                                   | 12(C80×14M30×2F500×2)q4              | 76/754             | 100/649           | -17.8         | 31.7            |                                                                |                                                              |  |
| 78E UK/Asia Collab.                                     | 8(C50M25F600)q3; 16(C100×4M25F600)q4 | 88/674             | 108/602           | -9.4          | 33.9            |                                                                |                                                              |  |
| 79E Guy's/Manch. II                                     | 6(C80×14M32×2F480×2)q4               | 77/672             | 125/577           | -25.5         | 33.4            |                                                                |                                                              |  |
| 79H Paris                                               | 6(C400×2M40×2F400×2)q4               | 35/716             | 46/659            | -7.8          | 18.1            |                                                                |                                                              |  |
| 80F FM Italy 8004                                       | 12(C600M40F600)q3                    | 9/218              | 23/155            | -8.7          | 6.9             |                                                                |                                                              |  |
| 82C DBCG 82c postmenop.                                 | 9(C600M40×2F400×2)q4                 | 350/2476           | 392/2414          | -31.0         | 145.2           |                                                                |                                                              |  |
| 84D NCIC MA.4                                           | 8(C600M40F600)q3                     | 125/1427           | 143/1359          | -12.2         | 58.8            |                                                                |                                                              |  |
| 86H2 IBCSG VII *                                        | 3(C100×14M40×2F600×2)q4              | 224/2471           | 2(126/1177)       | -16.7         | 65.2            |                                                                |                                                              |  |
| 87D3 GABG 3 Germany                                     | 6(C500×2M40×2F600×2)q4               | 45/943             | 51/821            | -5.8          | 21.6            |                                                                |                                                              |  |
| 88D IBCSG IX                                            | 3(C100×14M40×2F600×2)q4              | 90/3903            | 125/3799          | -18.9         | 51.7            |                                                                |                                                              |  |
| 89J1 CRCRAMS Moscow                                     | 6(C550×2M25×2F500×2)q3-4             | 2/37               | 4/24              | -1.1          | 1.4             |                                                                |                                                              |  |
| 90X1 Tokyo CIH                                          | 6(C500M30F500)q3                     | 16/545             | 14/552            | 1.2           | 6.9             |                                                                |                                                              |  |
| 90E Sweden-Finland                                      | 9(C600M40F600)q3                     |                    |                   | (no data)     |                 |                                                                |                                                              |  |
| 93S Hamburg, Germany                                    | 6(C500×2M40×2F600×2)q4               | 15/377             | 21/406            | -2.4          | 8.0             |                                                                |                                                              |  |
| 93X INC Brazil                                          | 6(C600M40F600)q3                     |                    |                   | (no data)     |                 |                                                                |                                                              |  |
| 94P Charles U Prague                                    | 6(C500×2M40×2F600×2)q4               |                    |                   | (no data)     |                 |                                                                |                                                              |  |
| <b>(b) subtotal with data §</b>                         |                                      | <b>1320/16661</b>  | <b>1599/15588</b> | <b>-185.0</b> | <b>553.4</b>    | <b>0.72 (SE 0.04)</b><br>reduction<br><b>2p &lt; 0.00001</b>   |                                                              |  |
| <b>Total (a + b)</b>                                    |                                      | <b>1869/27943</b>  | <b>2347/25905</b> | <b>-320.5</b> | <b>830.3</b>    | <b>0.680 (SE 0.029)</b><br>reduction<br><b>2p &lt; 0.00001</b> |                                                              |  |

■ 99% or ◊ 95% confidence intervals

Difference between treatment effects in 2 subtotals:  $\chi^2_1 = 4.4$ ;  $2p = 0.04$

Heterogeneity within subtotals:  $\chi^2_{26} = 36.9$ ;  $p = 0.08$

Heterogeneity between 28 trials:  $\chi^2_{27} = 41.3$ ;  $p = 0.04$

§ 3 trials with no data do not contribute to subtotals or to the overall total.

\* For balance, control patients in 3-way trials or trial strata count half or twice in subtotal(s) and in final total of events/woman-years.

Agents: C = cyclophosphamide; F = fluorouracil; M = methotrexate

(Not shown: antibiotic, hormonal, local or steroid therapies)

Semicolon [:] indicates treatment sequence; ×2 means d1,8 iv; ×4 means d3-6 iv

0 0.5 1.0 1.5 2.0  
CMF better | CMF worse  
Treatment effect  $2p < 0.00001$

## P 52: RECURRENCE in trials of CMF regimen vs. No chemotherapy

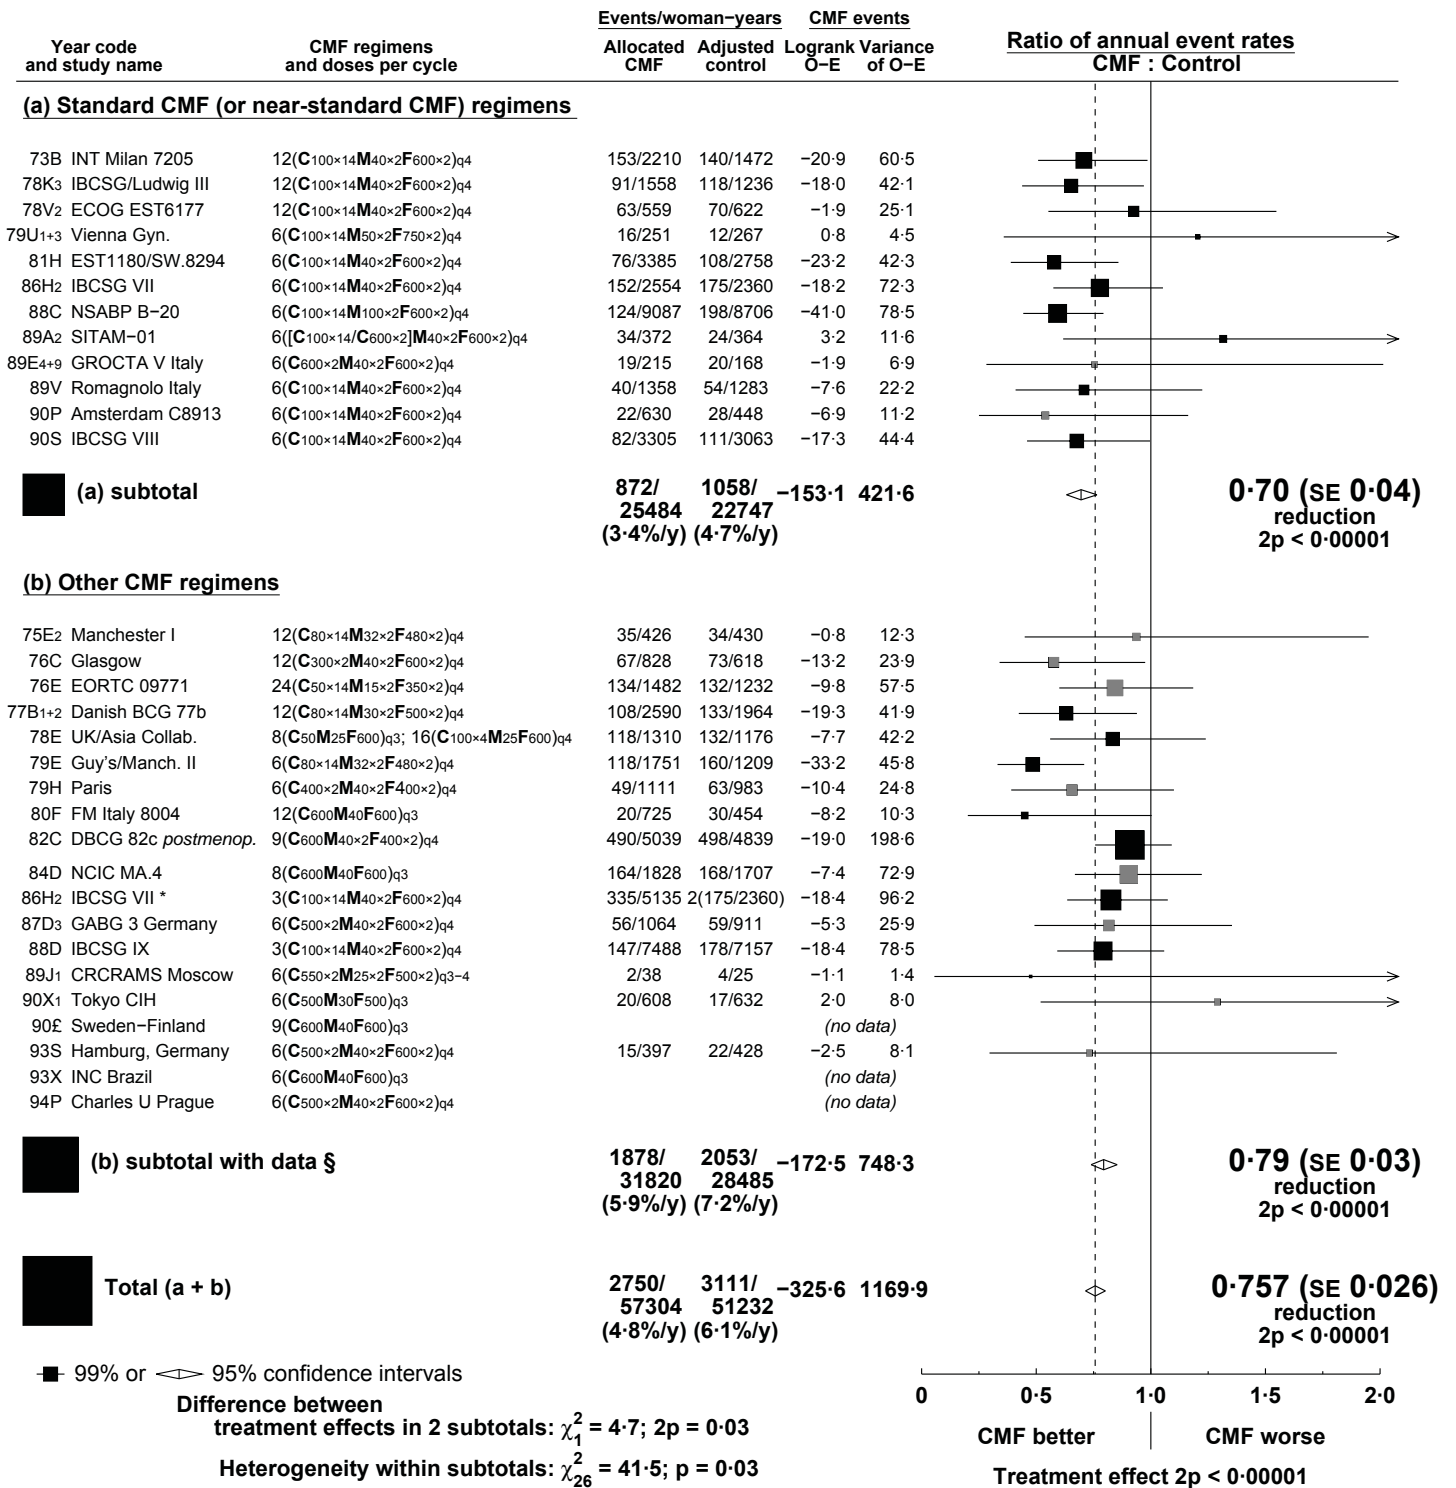

■ 99% or ◊ 95% confidence intervals

Difference between treatment effects in 2 subtotals:  $\chi^2_1 = 4.7$ ; 2p = 0.03

Heterogeneity within subtotals:  $\chi^2_{26} = 41.5$ ; p = 0.03

Heterogeneity between 28 trials:  $\chi^2_{27} = 46.3$ ; p = 0.01

§ 3 trials with no data do not contribute to subtotals or to the overall total.

\* For balance, control patients in 3-way trials or trial strata count half or twice in subtotal(s) and in final total of events/woman-years.

Agents: C = cyclophosphamide; F = fluorouracil; M = methotrexate

(Not shown: antibiotic, hormonal, local or steroid therapies)

Semicolon [:] indicates treatment sequence; ×2 means d1,8 iv; ×4 means d3-6 iv

# P 53: BREAST CANCER MORTALITY (MORTALITY WITH RECURRENCE) in trials of CMF regimen vs. No chemotherapy

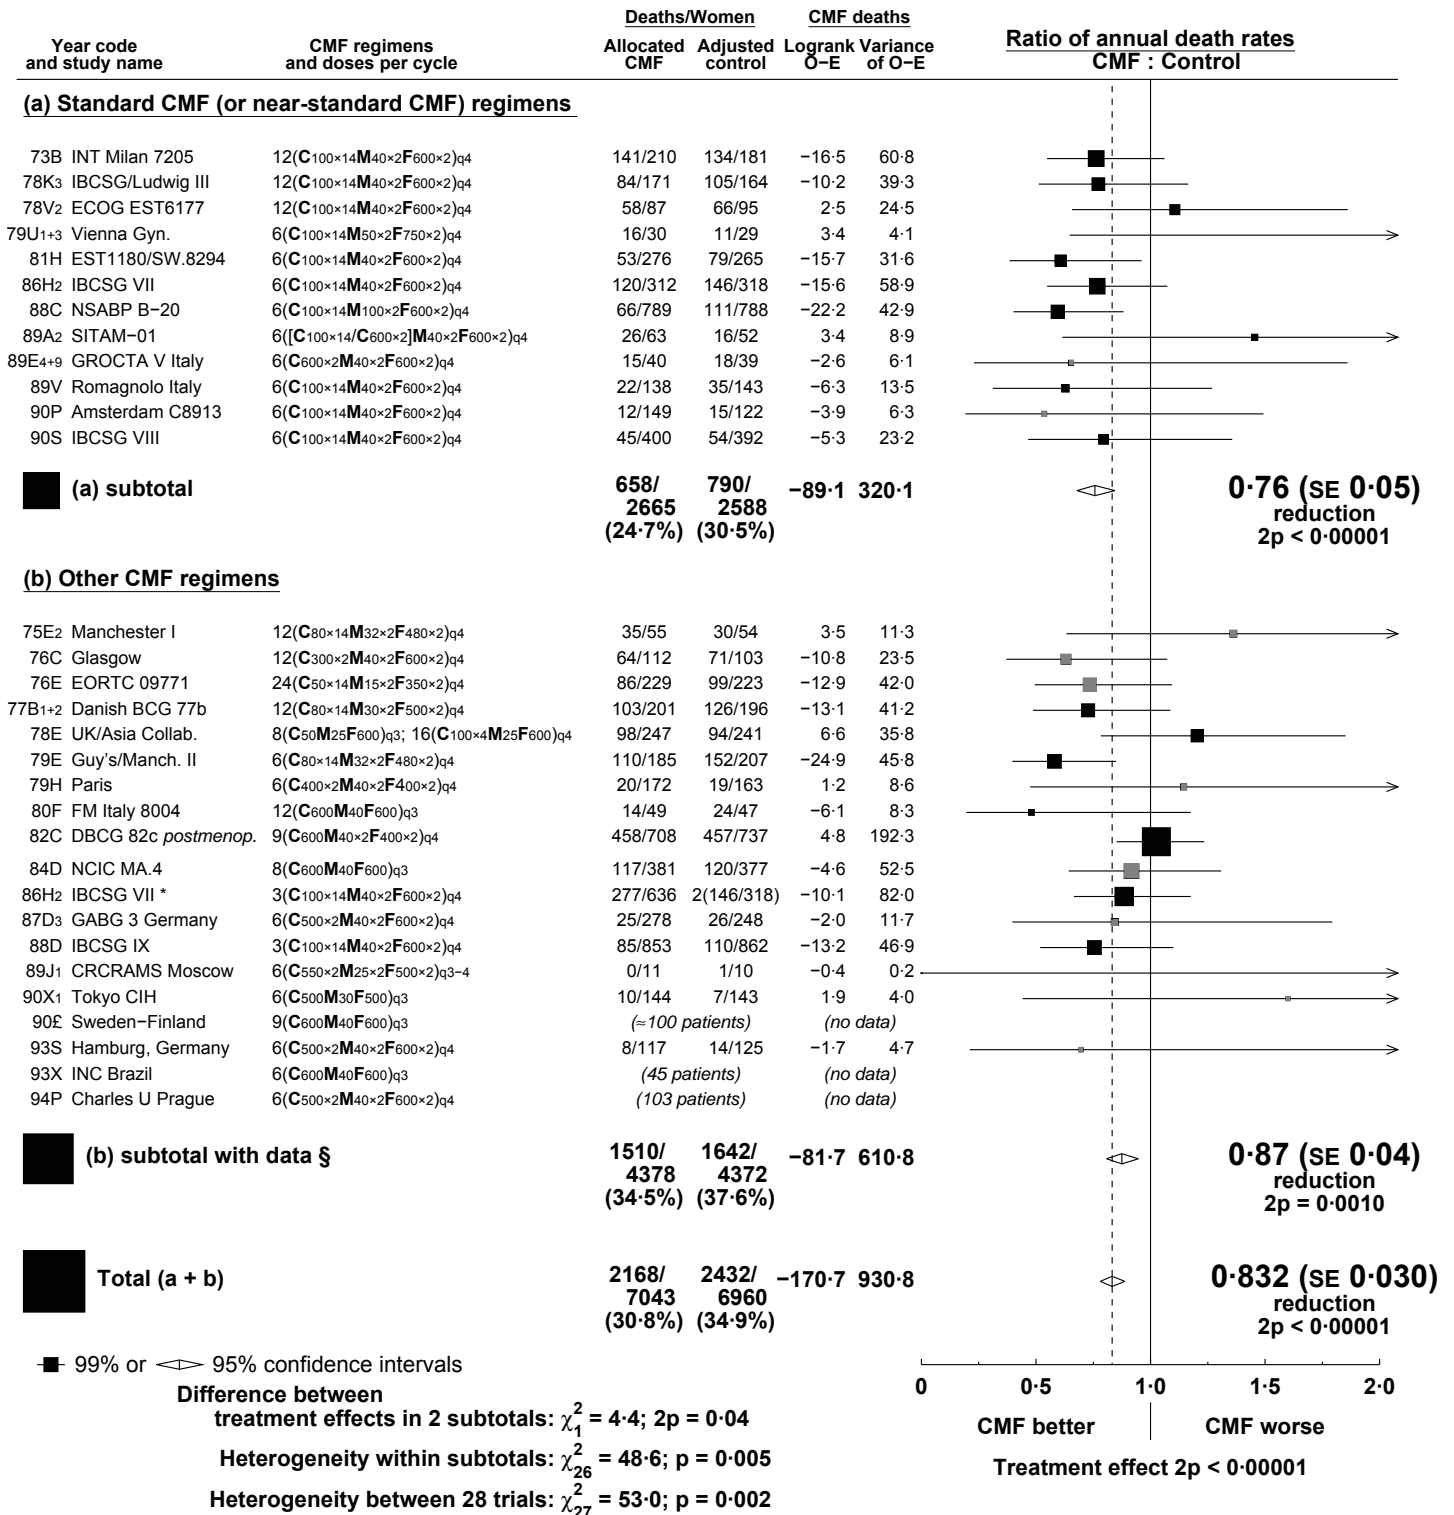

§ 3 trials with no data do not contribute to subtotals or to the overall total.

\* For balance, control patients in 3-way trials or trial strata count half or twice in subtotal(s) and in final total of deaths/women.

Agents: C = cyclophosphamide; F = fluorouracil; M = methotrexate  
(Not shown: antibiotic, hormonal, local or steroid therapies)

Semicolon [;] indicates treatment sequence; ×2 means d1,8 iv; ×4 means d3-6 iv

# P 54: MORTALITY WITHOUT RECURRENCE IN FIRST YEAR in trials of CMF regimen vs. No chemotherapy

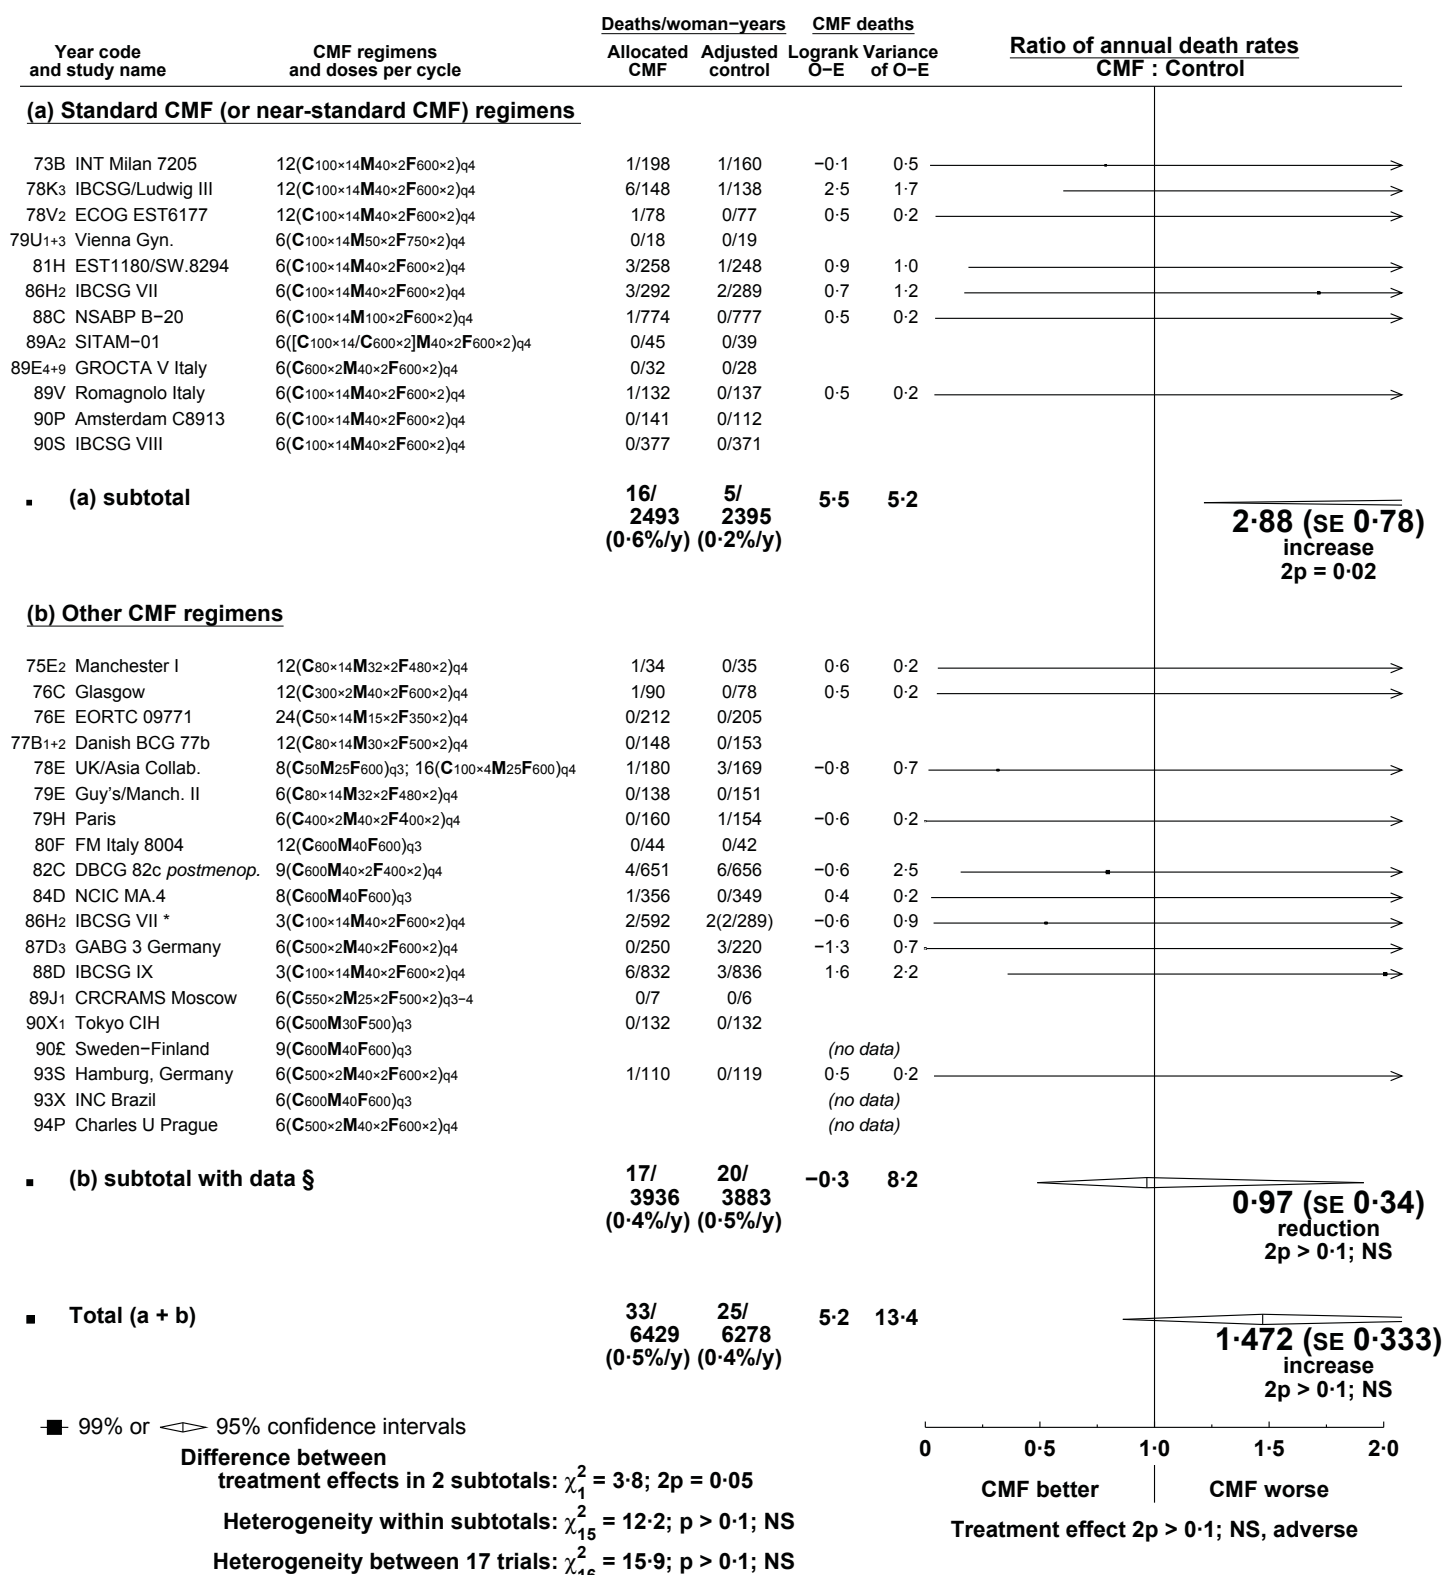

■ 99% or ◁▷ 95% confidence intervals

Difference between treatment effects in 2 subtotals:  $\chi^2_1 = 3.8$ ; 2p = 0.05

Heterogeneity within subtotals:  $\chi^2_{15} = 12.2$ ; p > 0.1; NS

Heterogeneity between 17 trials:  $\chi^2_{16} = 15.9$ ; p > 0.1; NS

§ 3 trials with no data do not contribute to subtotals or to the overall total.

\* For balance, control patients in 3-way trials or trial strata count half or twice in subtotal(s) and in final total of deaths/woman-years.

Agents: C = cyclophosphamide; F = fluorouracil; M = methotrexate  
(Not shown: antibiotic, hormonal, local or steroid therapies)

Semicolon [;] indicates treatment sequence; ×2 means d1,8 iv; ×4 means d3-6 iv

# P 55: MORTALITY WITHOUT RECURRENCE in trials of CMF regimen vs. No chemotherapy

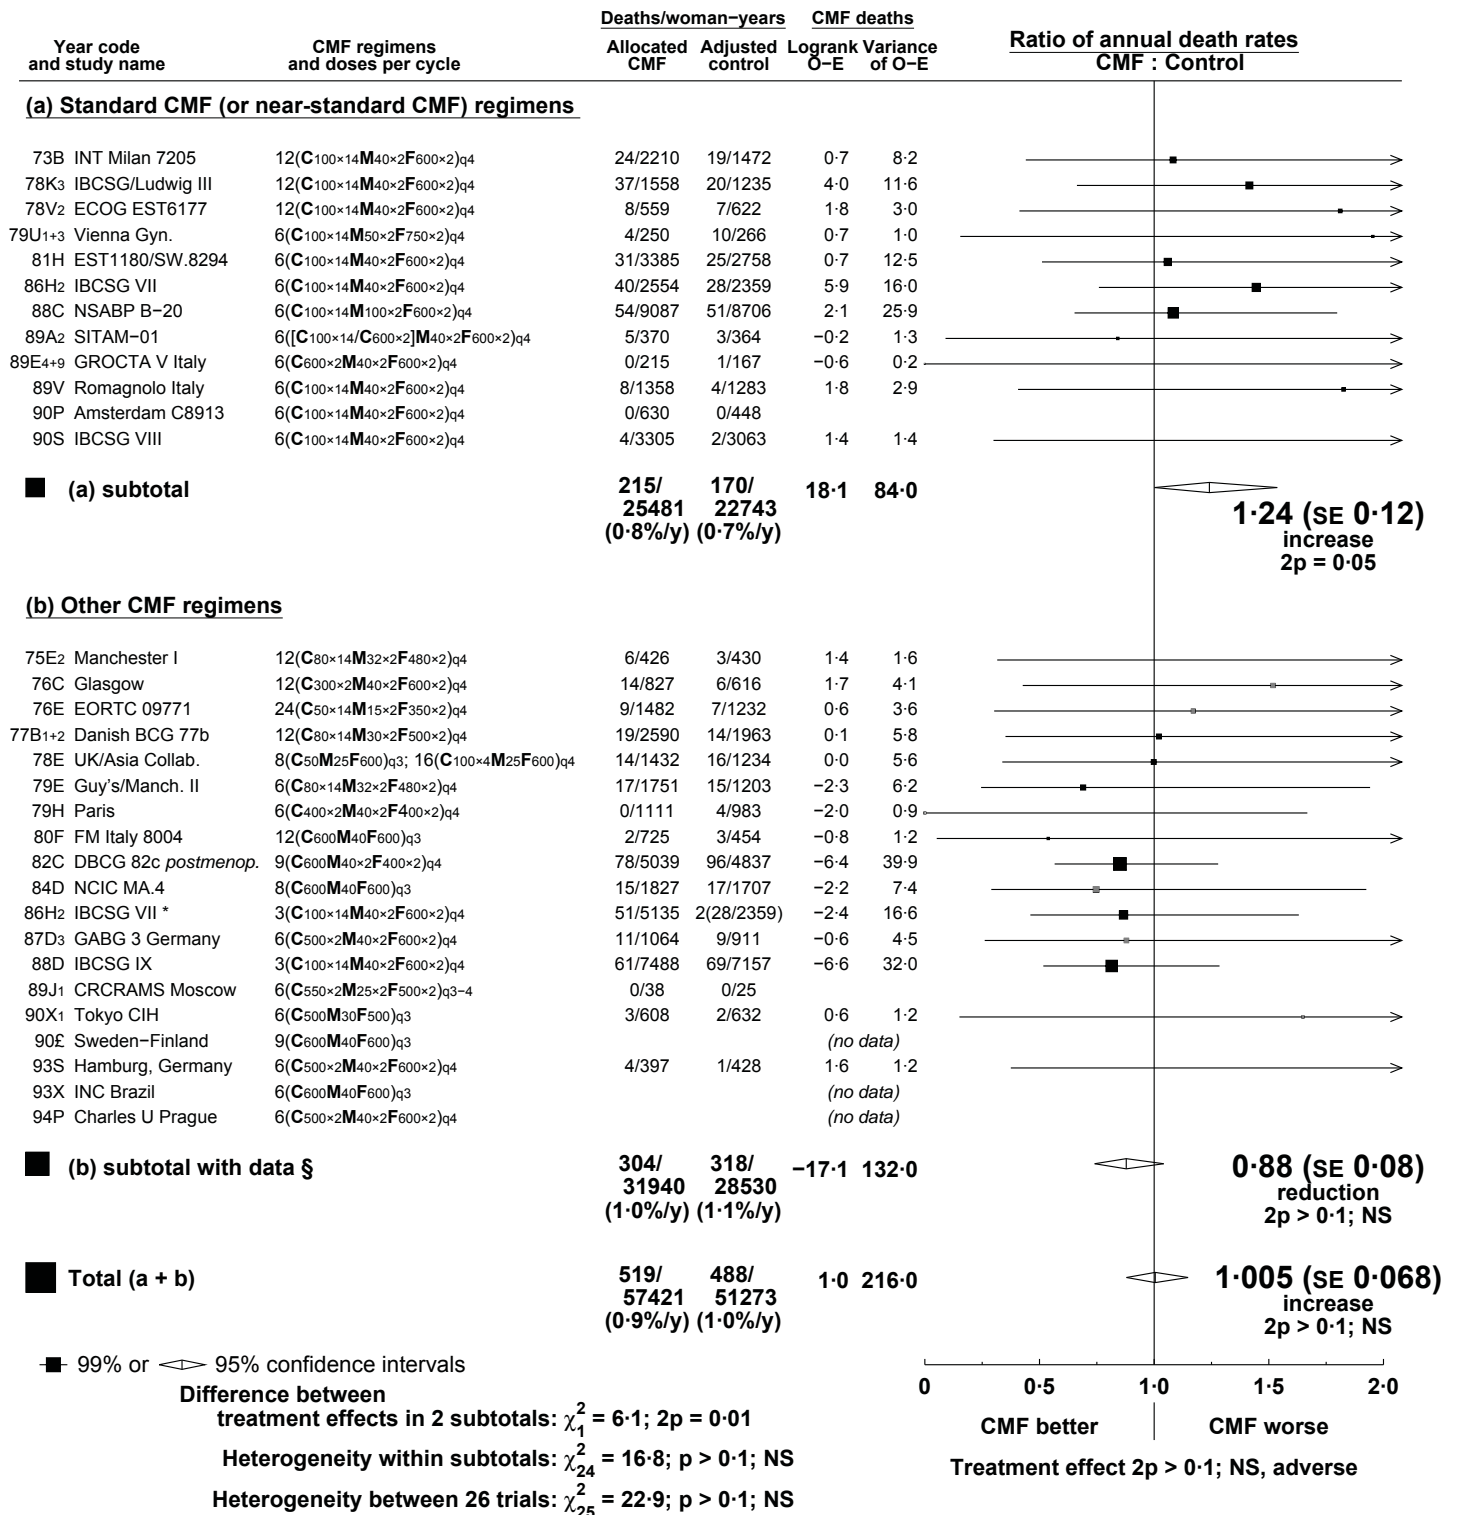



# P 56: OVERALL MORTALITY in trials of CMF regimen vs. No chemotherapy

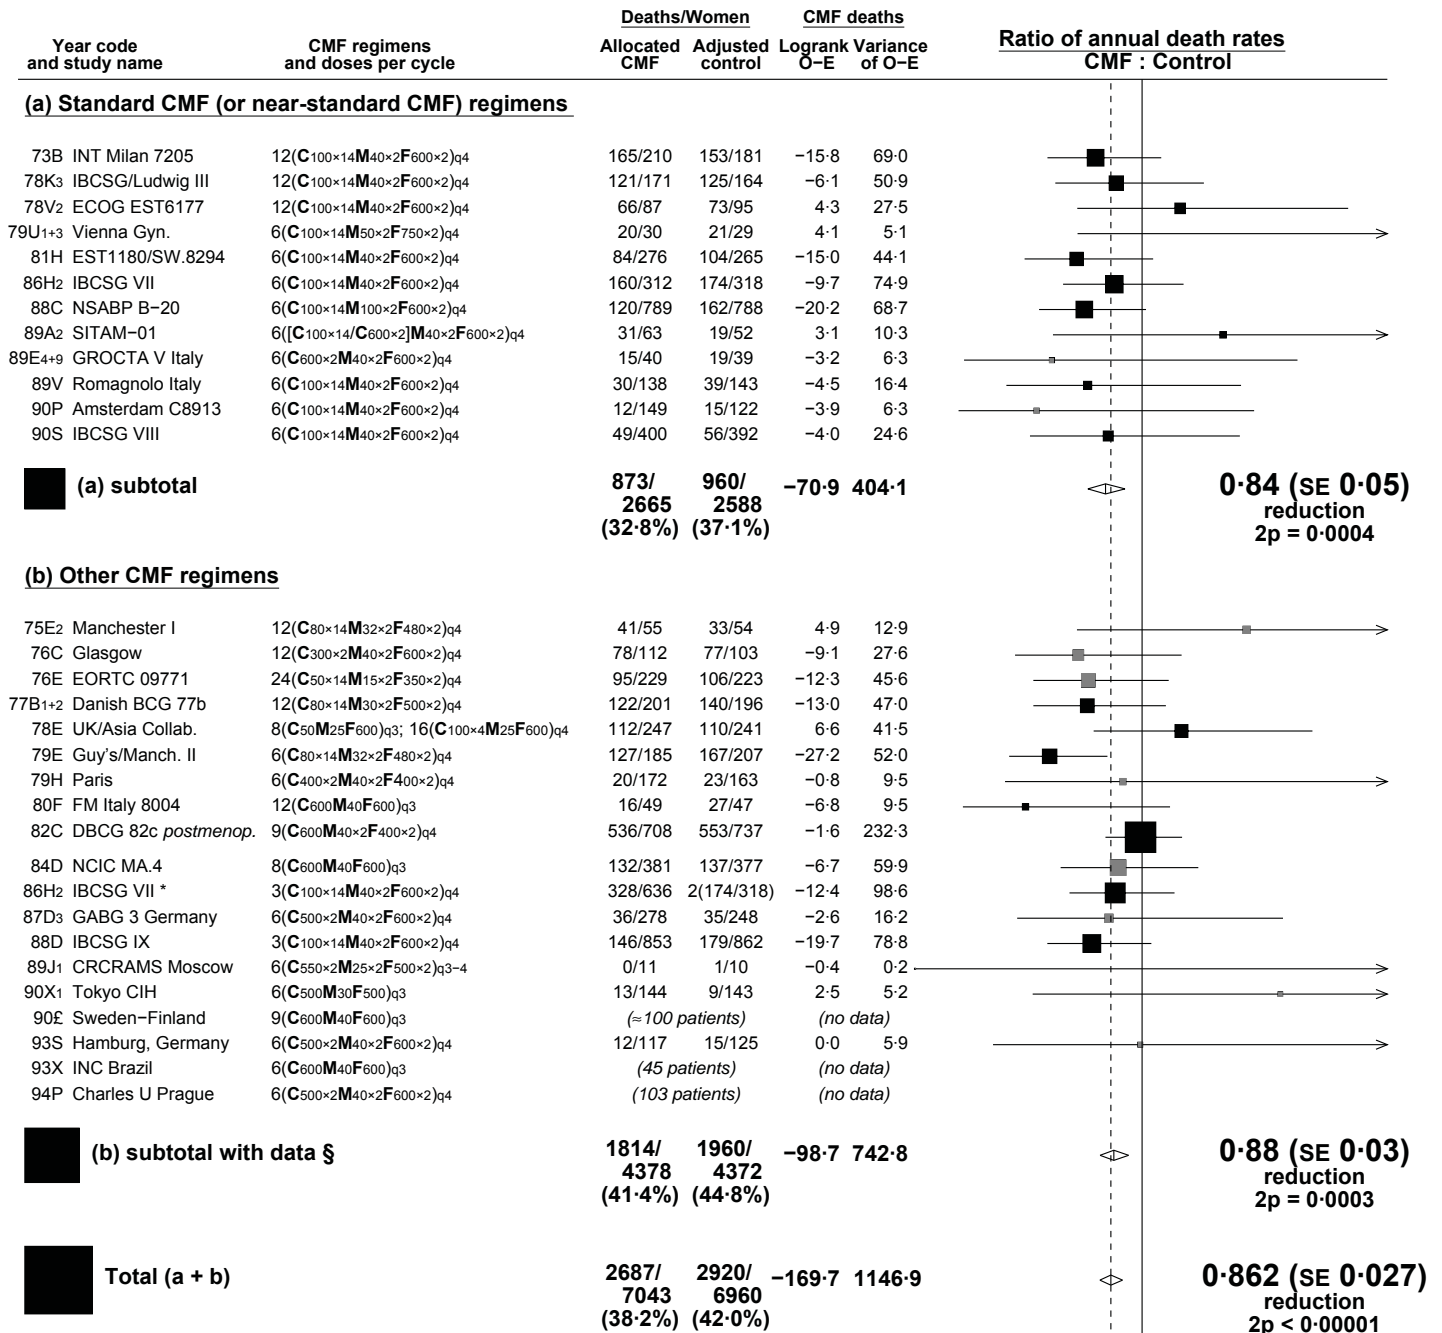

■ 99% or ◊ 95% confidence intervals

Difference between treatment effects in 2 subtotals:  $\chi^2_1 = 0.5$ ;  $2p > 0.1$ ; NS

Heterogeneity within subtotals:  $\chi^2_{26} = 43.6$ ;  $p = 0.02$

Heterogeneity between 28 trials:  $\chi^2_{27} = 44.1$ ;  $p = 0.02$

§ 3 trials with no data do not contribute to subtotals or to the overall total.

\* For balance, control patients in 3-way trials or trial strata count half or twice in subtotal(s) and in final total of deaths/women.

Agents: C = cyclophosphamide; F = fluorouracil; M = methotrexate  
(Not shown: antibiotic, hormonal, local or steroid therapies)

Semicolon [:] indicates treatment sequence; ×2 means d1,8 iv; ×4 means d3-6 iv

0 0.5 1.0 1.5 2.0  
CMF better | CMF worse  
Treatment effect  $2p < 0.00001$

# P 57: EARLY RECURRENCE (first 5 years) in trials of polychemotherapy vs. No chemotherapy

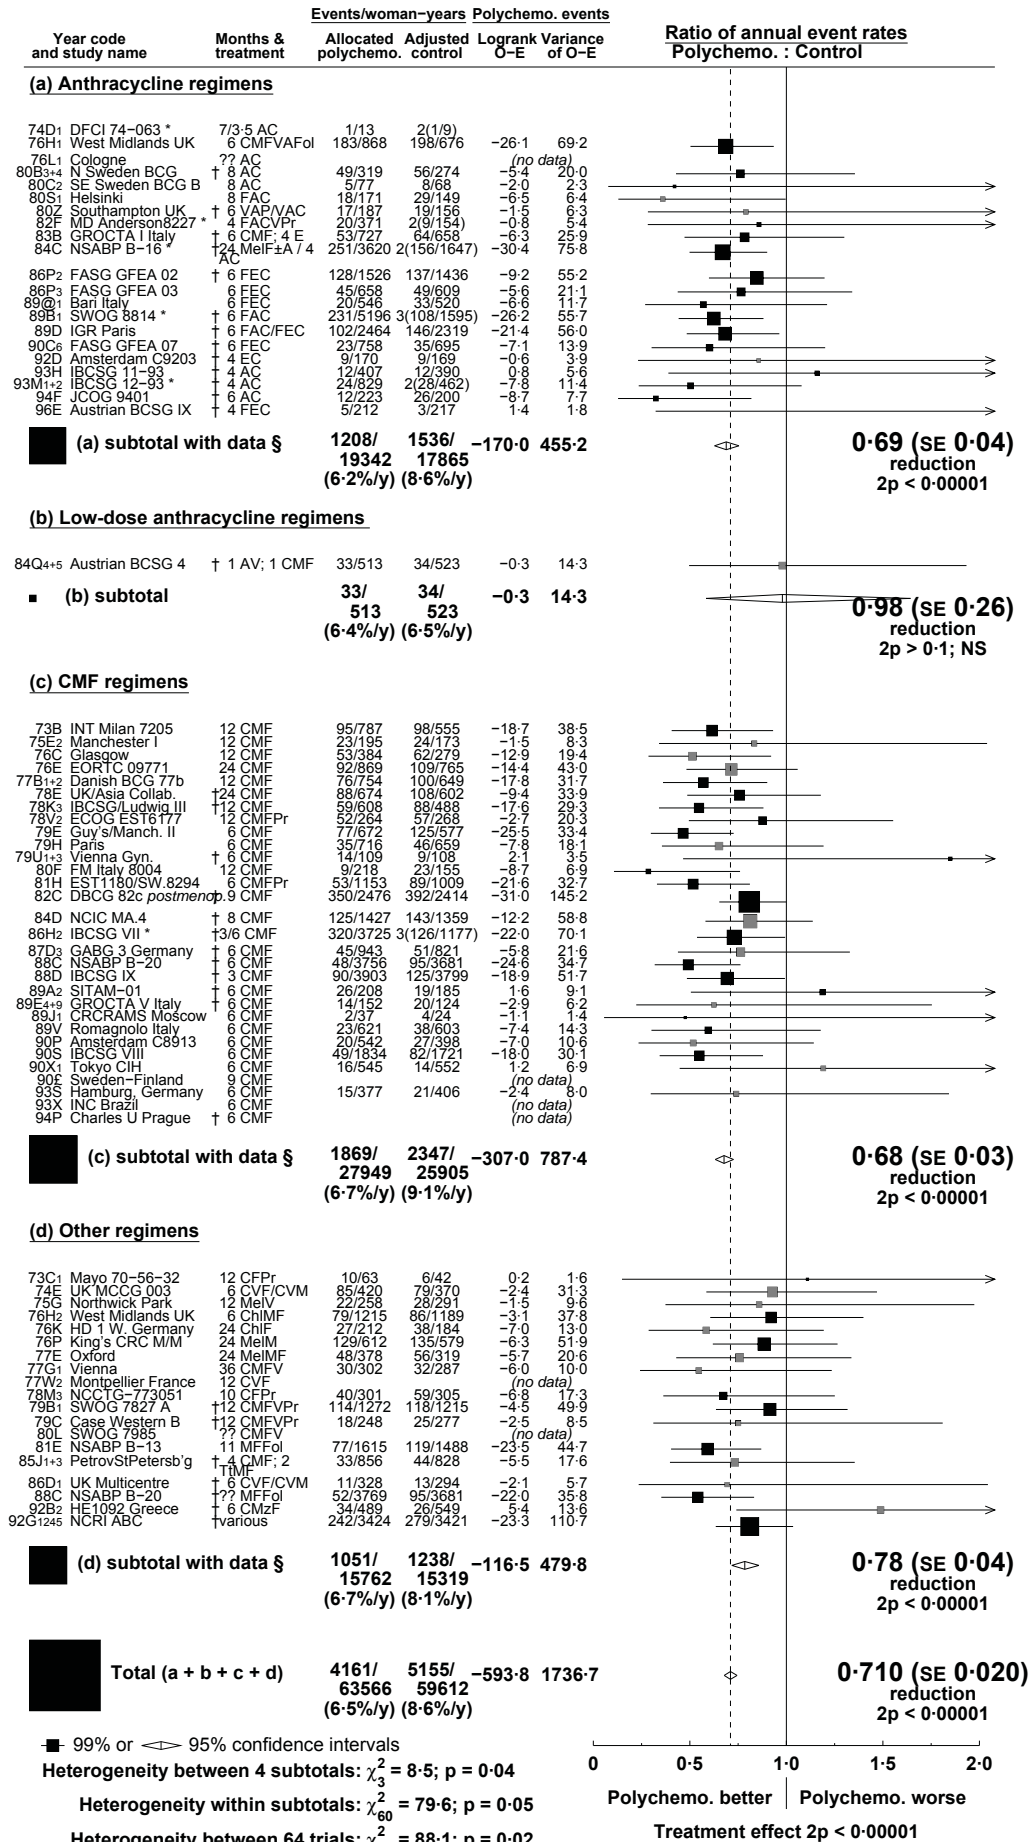

# P 58: RECURRENCE in trials of polychemotherapy vs. No chemotherapy

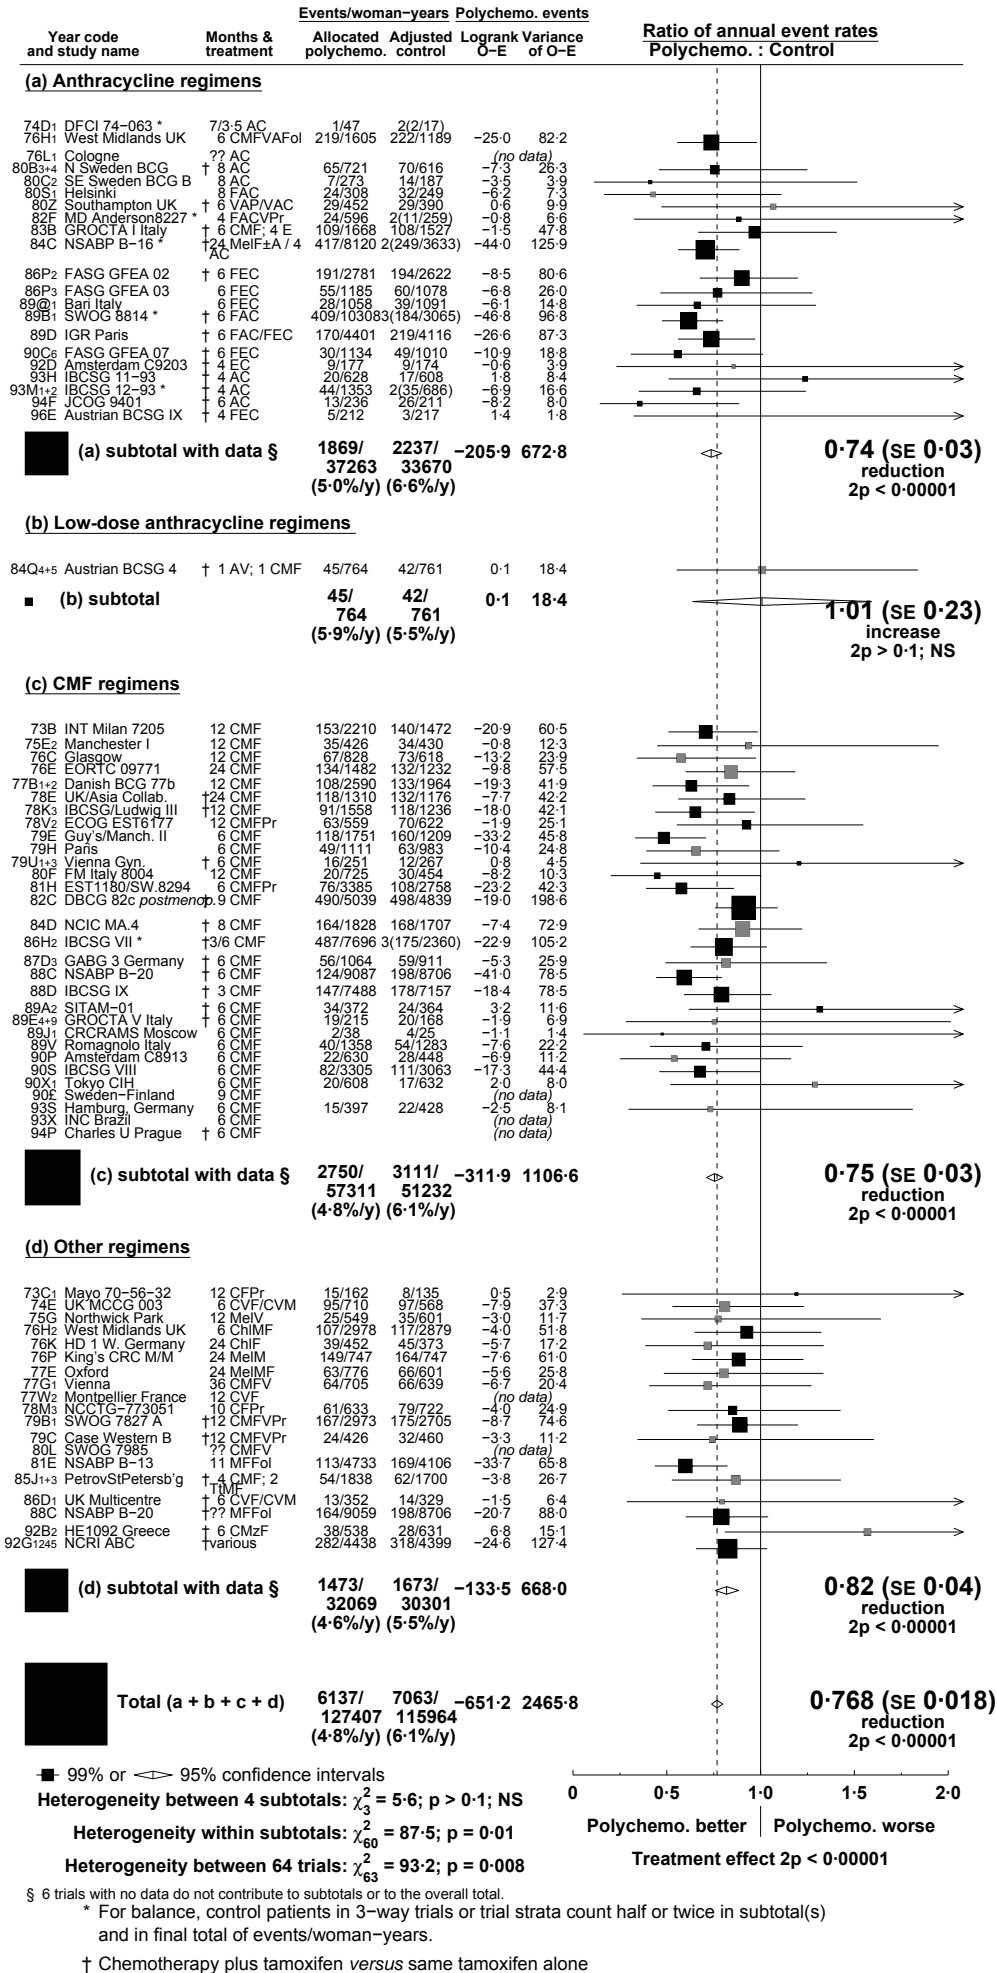

# P 59: BREAST CANCER MORTALITY (MORTALITY WITH RECURRENCE) in trials of polychemotherapy vs. No Chemotherapy

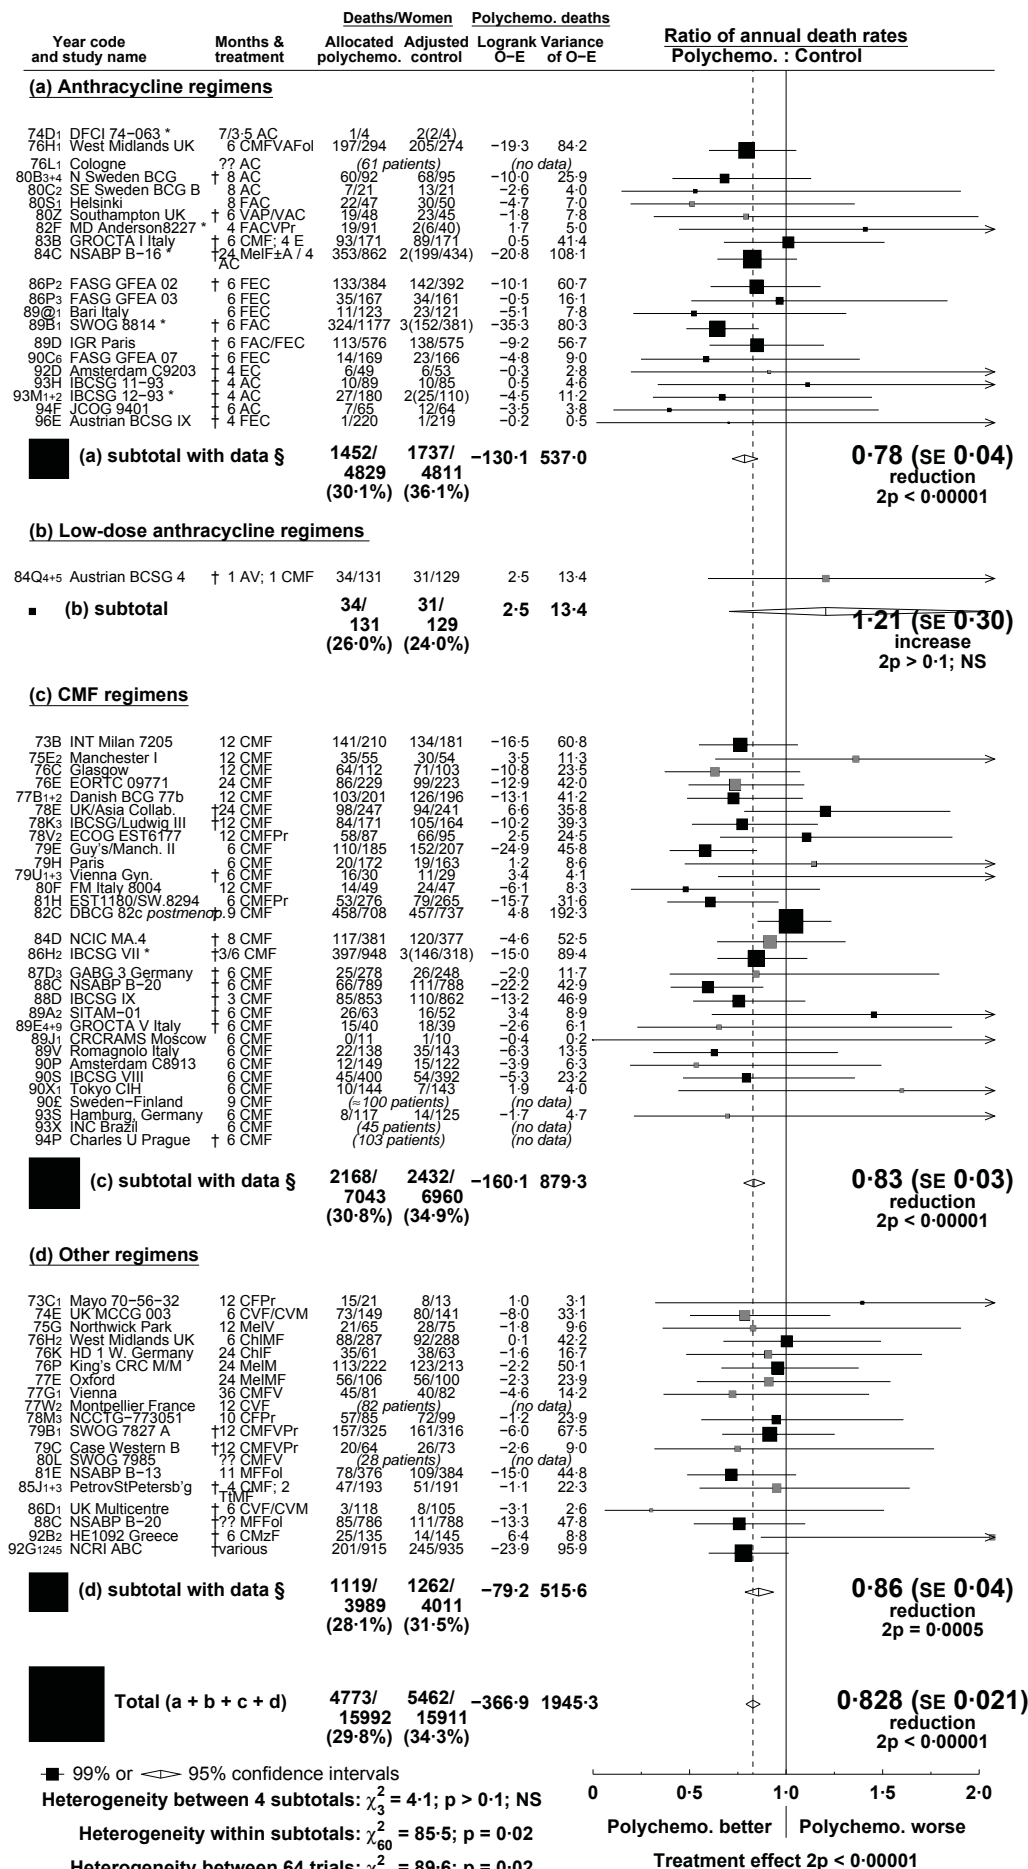

# P 60: MORTALITY WITHOUT RECURRENCE IN FIRST YEAR in trials of polychemotherapy vs. No chemotherapy

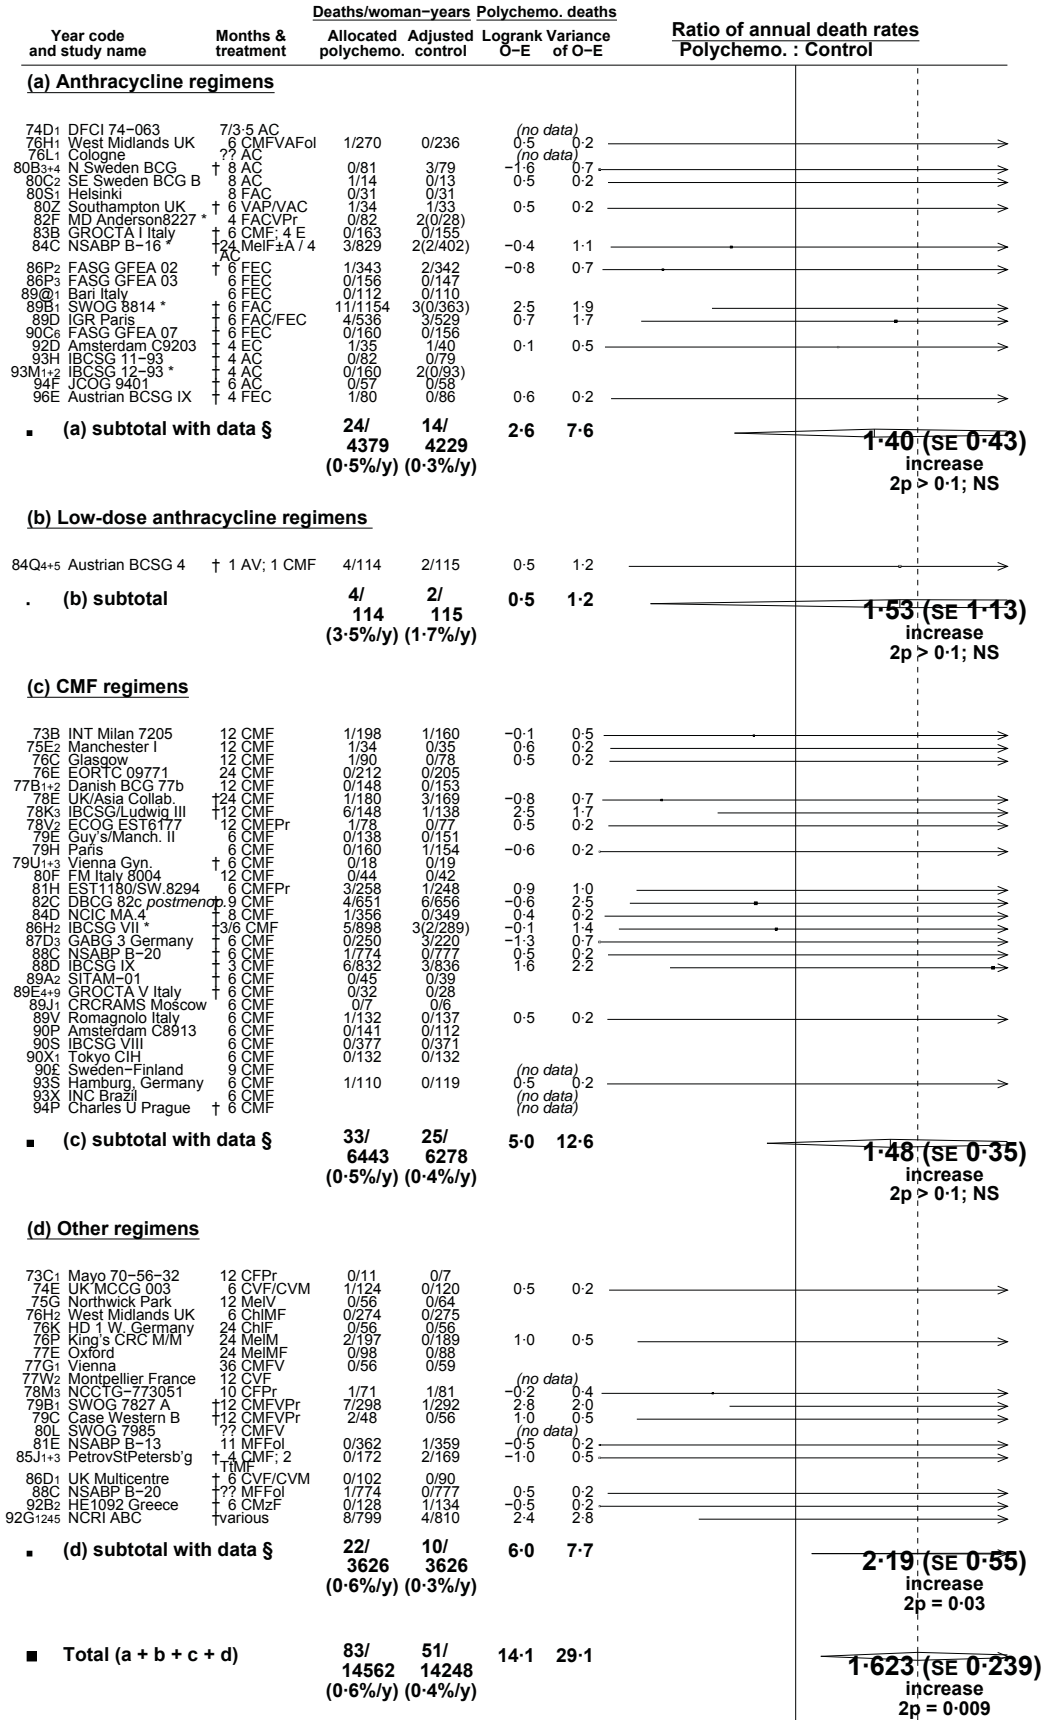

■ 99% or ◁▷ 95% confidence intervals

Heterogeneity between 4 subtotals:  $\chi^2_3 = 1.0; p > 0.1; NS$

Heterogeneity within subtotals:  $\chi^2_{33} = 38.2; p > 0.1; NS$

Heterogeneity between 37 trials:  $\chi^2_{36} = 39.1; p > 0.1; NS$

§ 7 trials with no data do not contribute to subtotals or to the overall total.

\* For balance, control patients in 3-way trials or trial strata count half or twice in subtotal(s) and in final total of deaths/woman-years.

† Chemotherapy plus tamoxifen versus same tamoxifen alone

# P 61: MORTALITY WITHOUT RECURRENCE in trials of polychemotherapy vs. No chemotherapy

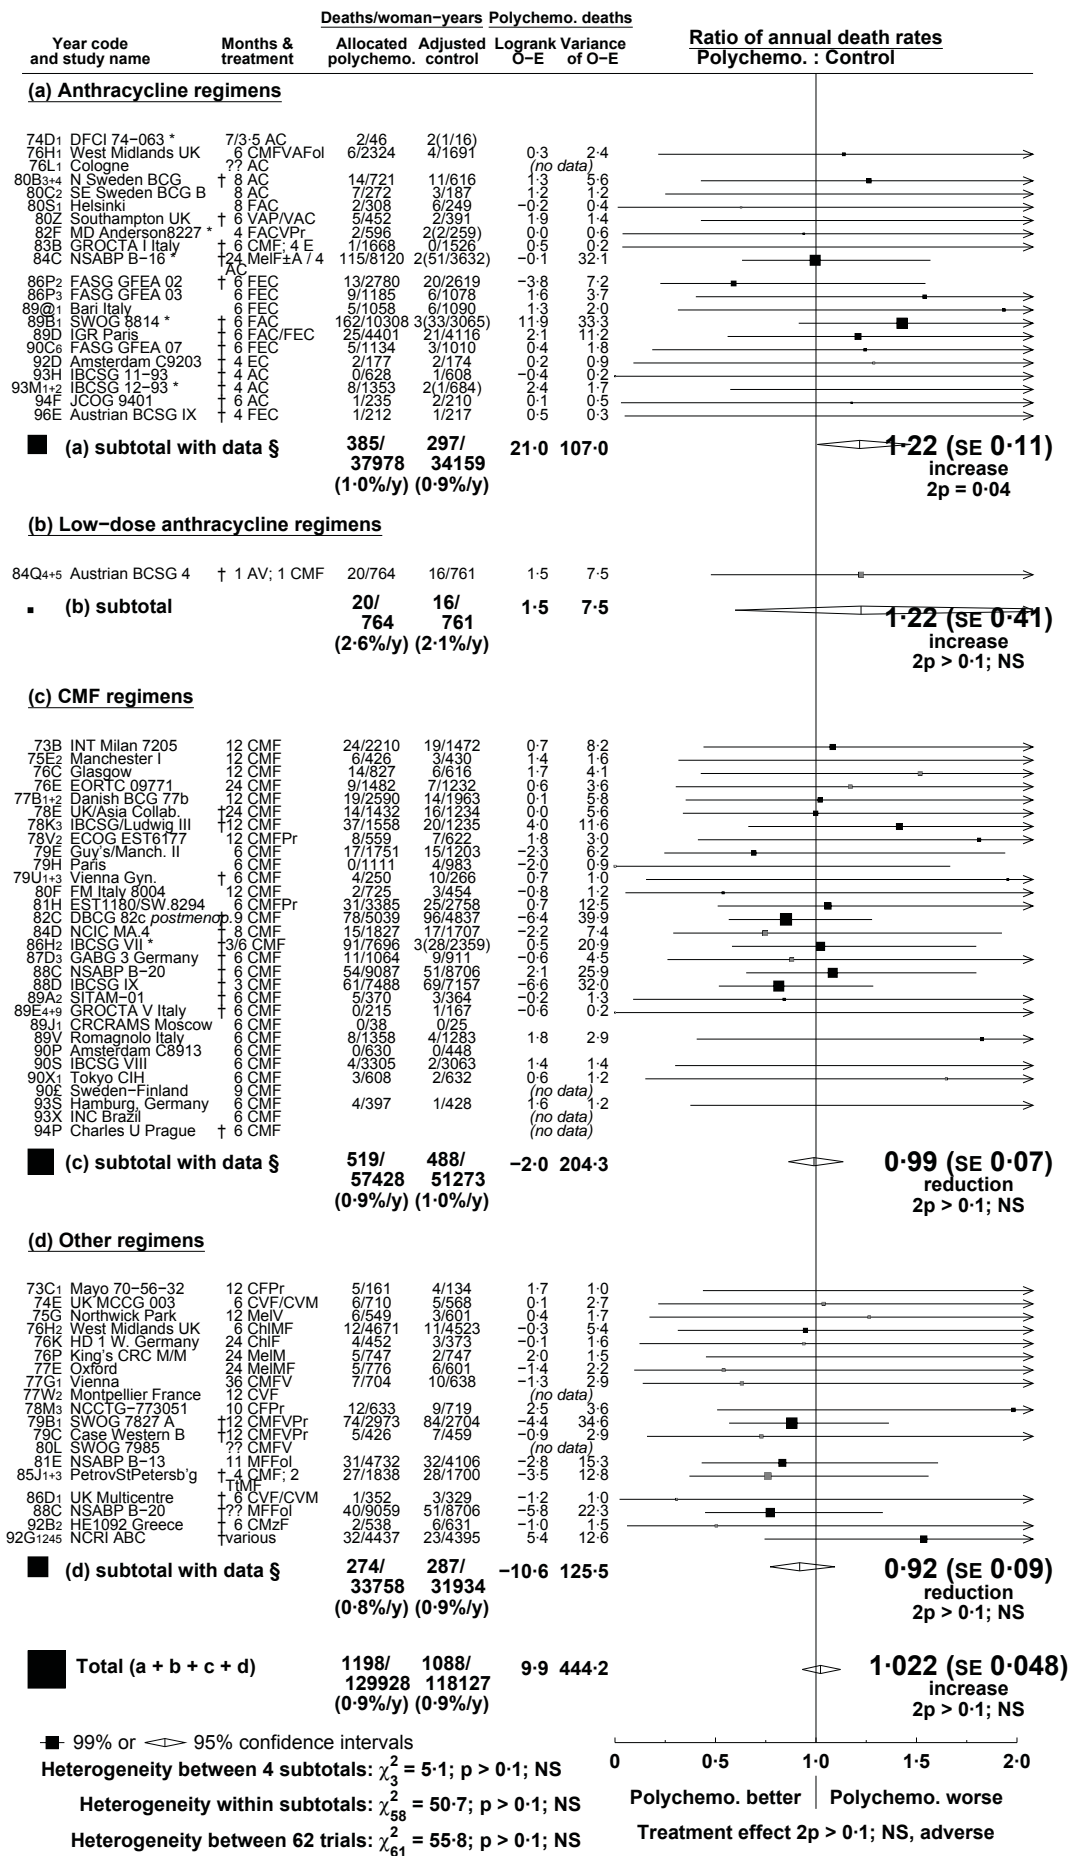

# P 62: OVERALL MORTALITY in trials of polychemotherapy vs. No chemotherapy

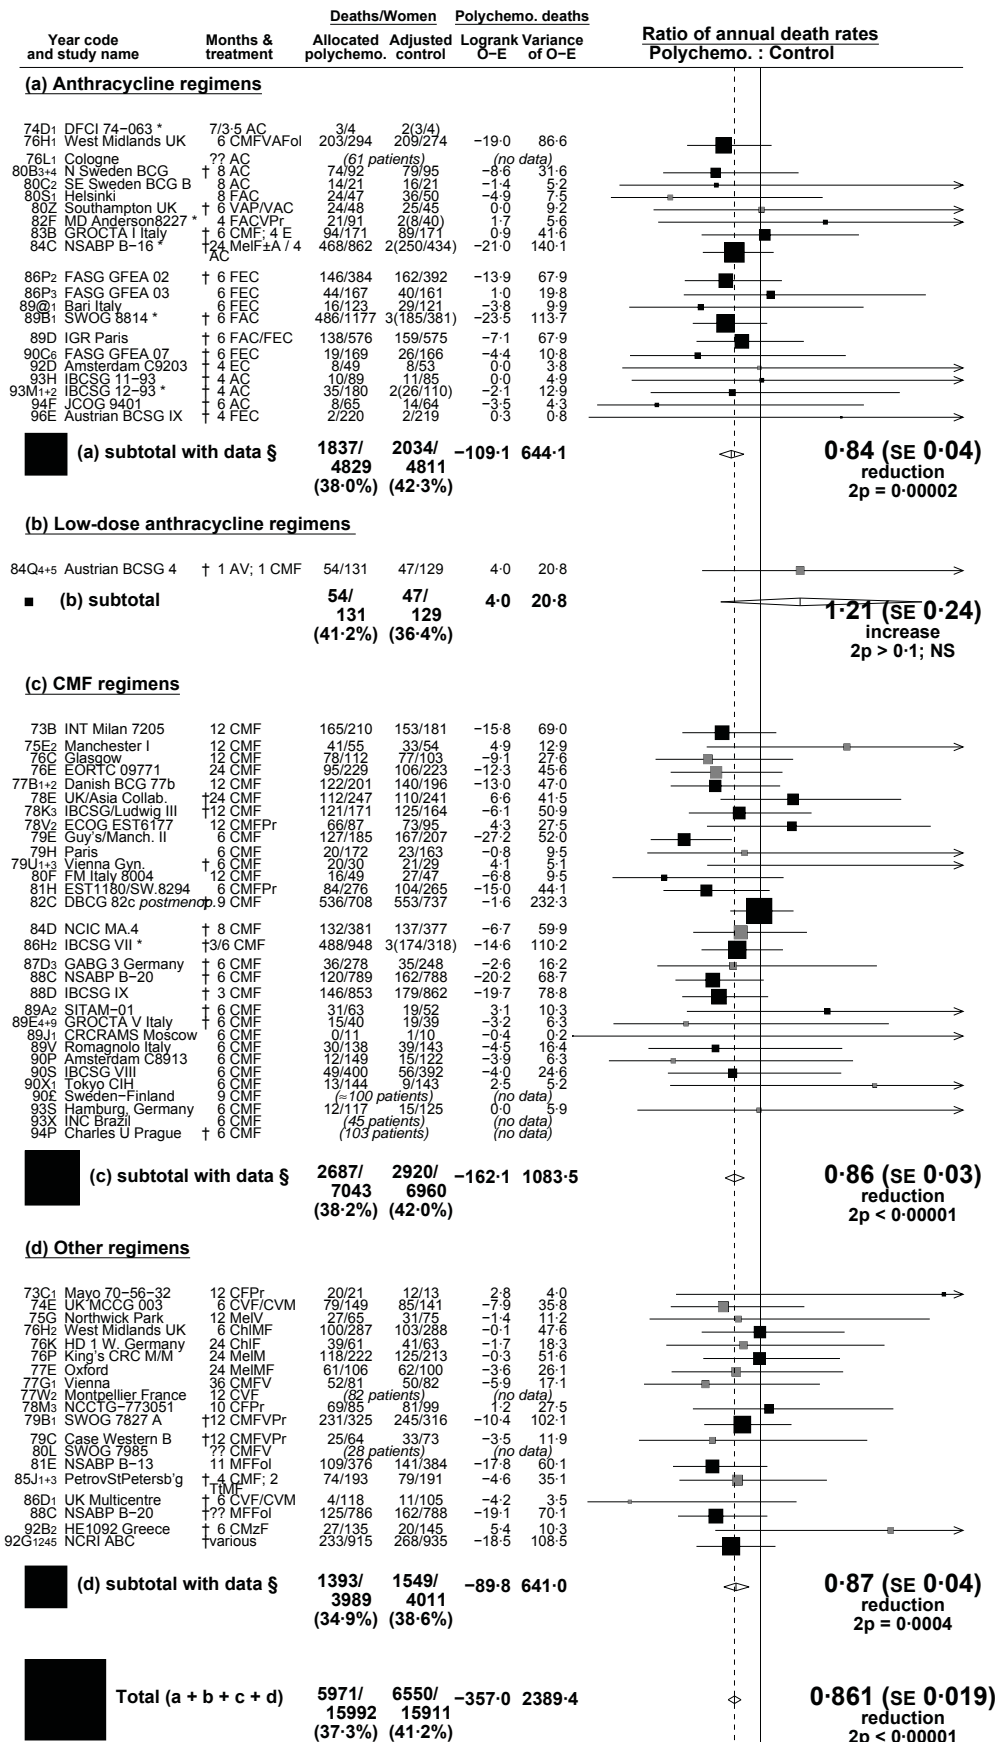

■ 99% or ◊ 95% confidence intervals

Heterogeneity between 4 subtotals:  $\chi^2_3 = 2.7$ ;  $p > 0.1$ ; NS

Heterogeneity within subtotals:  $\chi^2_{60} = 72.5$ ;  $p > 0.1$ ; NS

Heterogeneity between 64 trials:  $\chi^2_{63} = 75.2$ ;  $p > 0.1$ ; NS

§ 6 trials with no data do not contribute to subtotals or to the overall total.

\* For balance, control patients in 3-way trials or trial strata count half or twice in subtotal(s) and in final total of deaths/women.

† Chemotherapy plus tamoxifen versus same tamoxifen alone

0 0.5 1.0 1.5 2.0  
Polychemo. better | Polychemo. worse  
Treatment effect 2p < 0.00001

**P63: Table of non-breast-cancer mortality without recurrence during the first year after randomisation, by age for various chemotherapy comparisons**

| Treatments compared<br>(Active vs Control)                                            | Entry age<br>(years)* | Deaths/woman-years     |                        |
|---------------------------------------------------------------------------------------|-----------------------|------------------------|------------------------|
|                                                                                       |                       | Active                 | Control**              |
| 1. Taxane-plus-anthracycline-based regimen<br>vs same or more non-taxane chemotherapy | <55                   | 28/13174 (0.2%)        | 21/13117 (0.2%)        |
|                                                                                       | 55-69                 | 31/6303 (0.5%)         | 19/6269 (0.3%)         |
|                                                                                       | 70+                   | 7/244 (2.9%)           | 6/264 (2.3%)           |
|                                                                                       | <b>All</b>            | <b>66/19721 (0.3%)</b> | <b>46/19650 (0.2%)</b> |
|                                                                                       |                       |                        |                        |
| 2. Any anthracycline-based regimen*<br>vs standard CMF                                | <55                   | 12/6416 (0.2%)         | 13/6405 (0.2%)         |
|                                                                                       | 55-69                 | 11/1821 (0.6%)         | 13/1780 (0.7%)         |
|                                                                                       | 70+                   | 0/78 (0.0%)            | 1/80 (1.3%)            |
|                                                                                       | <b>All</b>            | <b>23/8358 (0.3%)</b>  | <b>27/8321 (0.3%)</b>  |
|                                                                                       |                       |                        |                        |
| 3. Any anthracycline-based regimen<br>vs no chemotherapy                              | <55                   | 3/1356 (0.2%)          | 4/1324 (0.3%)          |
|                                                                                       | 55-69                 | 17/2766 (0.6%)         | 10/2677 (0.4%)         |
|                                                                                       | 70+                   | 4/168 (2.4%)           | 0/162 (0.0%)           |
|                                                                                       | <b>All</b>            | <b>24/4296 (0.6%)</b>  | <b>14/4165 (0.3%)</b>  |
|                                                                                       |                       |                        |                        |
| 4. Any CMF regimen<br>vs no chemotherapy†                                             | <55                   | 3/2748 (0.1%)          | 5/2613 (0.2%)          |
|                                                                                       | 55-69                 | 27/3452 (0.8%)         | 15/3435 (0.4%)         |
|                                                                                       | 70+                   | 3/228 (1.3%)           | 5/231 (2.2%)           |
|                                                                                       | <b>All</b>            | <b>33/6429 (0.5%)</b>  | <b>25/6279 (0.4%)</b>  |
|                                                                                       |                       |                        |                        |

\* The few women of unknown age are excluded from the age-specific subgroups but included in the totals; none of them died in year 0 without recurrence.

\*\* For balance, control patients count twice in the few trials with allocation ratio 2:1.

† 8/468 (2.1%) vs 2/540 (0.4%) in 3 small, old (began 1973-78) trials of 12 cycles of standard CMF, 8/2194 (0.4%) vs 3/2047 (0.15%) in trials of 6 cycles of standard CMF, and 14/4374 (0.4%) vs 20/4370 (0.5%) in trials of other CMF regimens.



**P 64: One or more references for each trial in the forest plots on pp 21-50 of breast cancer mortality (in the same order as in those forest plots)**

**Trials of TAXANES (see webappendix page 23):**

**(a) Taxane-plus-anthracycline-based regimen (with taxane courses NOT overlapping with any other chemo. courses) vs the SAME non-taxane cytotoxic regimen, but without the taxane courses**

| Year Code | Trial name      | Publication(s)                                                                                                                                                                                                                                                                                                                                                                                                                                                                                                                                                                        |
|-----------|-----------------|---------------------------------------------------------------------------------------------------------------------------------------------------------------------------------------------------------------------------------------------------------------------------------------------------------------------------------------------------------------------------------------------------------------------------------------------------------------------------------------------------------------------------------------------------------------------------------------|
| 98B       | Taxit216 Italy  | Cognetti F, De Laurentiis M, De Matteis A, et al. Sequential epirubicin-docetaxel-CMF as adjuvant therapy for node-positive early stage breast cancer: updated results of the Taxit216 randomized trial. <i>Ann Oncol</i> 2008; <b>19</b> : viii77, A1820 (abstract).<br><br>Bianco AR, De Laurentiis M, De Placido S, et al. Sequential epirubicin-docetaxel-CMF as adjuvant therapy for node-positive early-stage breast cancer: Subgroup analysis of the Taxit216 randomized trial. Breast Cancer Symposium 5-7 Sep 2008, A187 (abstract); Washington DC, USA.                     |
| 99T       | GOIM 9902 Italy | Lopez M, Brandi M, Foggi P, et al. Toxicity of epirubicin and cyclophosphamide (EC) vs. docetaxel (D) followed by EC in the adjuvant (adj) treatment of node positive breast cancer. A multicenter randomized phase III study (GOIM9902). <i>J Clin Oncol</i> 2006; <b>24</b> : A10526 (abstract).                                                                                                                                                                                                                                                                                    |
| 95J1-2    | NSABP B-27      | Bear HD, Anderson S, Smith RE, et al. Sequential preoperative or postoperative docetaxel added to preoperative doxorubicin plus cyclophosphamide for operable breast cancer: National Surgical Adjuvant Breast and Bowel Project Protocol B-27. <i>J Clin Oncol</i> 2006; <b>24</b> : 2019-27.                                                                                                                                                                                                                                                                                        |
| 95K       | NSABP B-28      | Mamounas EP, Bryant J, Lembersky B, et al. Paclitaxel after doxorubicin plus cyclophosphamide as adjuvant chemotherapy for node-positive breast cancer: results from NSABP B-28. <i>J Clin Oncol</i> 2005; <b>23</b> : 3686-96.                                                                                                                                                                                                                                                                                                                                                       |
| 94D1-3    | CALGB 9344      | Henderson IC, Berry DA, Demetri GD, et al. Improved outcomes from adding sequential paclitaxel but not from escalating doxorubicin dose in an adjuvant chemotherapy regimen for patients with node-positive primary breast cancer. <i>J Clin Oncol</i> 2003; <b>21</b> : 976-83.<br><br>Berry DA, Thor A, Jewell SD, et al. Benefits of adding paclitaxel to adjuvant doxorubicin/cyclophosphamide depending on HER2 & ER status: analysis of tumor tissue microarrays and immunohistochemistry in CALGB 9344 (Intergroup 0148). <i>Cancer Res</i> 2009; <b>69</b> : A606 (abstract). |

**(b) Taxane-plus-anthracycline-based regimen (with taxane courses NOT overlapping with any other chemo. courses) vs MORE (but < doubled) non-taxane cytotoxic chemotherapy**

| Year Code | Trial name         | Publication(s)                                                                                                                                                                                                                                                                                                                                                                                                                                                                                                                                                        |
|-----------|--------------------|-----------------------------------------------------------------------------------------------------------------------------------------------------------------------------------------------------------------------------------------------------------------------------------------------------------------------------------------------------------------------------------------------------------------------------------------------------------------------------------------------------------------------------------------------------------------------|
| 00S       | WSG/AGO AM-02      | Nitz U, Huober J, Lisboa B, et al. Superiority of sequential docetaxel over standard FE100C in patients with intermediate risk breast cancer: survival results of the randomized intergroup phase III trial EC-Doc. <i>Cancer Res</i> 2009; <b>69</b> : A78 (abstract).                                                                                                                                                                                                                                                                                               |
| 95T       | HORG Greece        | Polyzos A, Malamos N, Boukovinas I, et al. FEC versus sequential docetaxel followed by epirubicin/cyclophosphamide as adjuvant chemotherapy in women with axillary node-positive early breast cancer: a randomized study of the Hellenic Oncology Research Group (HORG). <i>Breast Cancer Res Treat</i> 2010; <b>119</b> : 95-104.                                                                                                                                                                                                                                    |
| 00E       | FinHer/FBCG 00-01  | Joensuu H, Bono P, Kataja V, et al. Fluorouracil, epirubicin, and cyclophosphamide with either docetaxel or vinorelbine, with or without trastuzumab, as adjuvant treatments of breast cancer: final results of the FinHer Trial. <i>J Clin Oncol</i> 2009; <b>27</b> : 5685-92.                                                                                                                                                                                                                                                                                      |
| 98D1      | BIG 02-98          | Francis P, Crown J, Di Leo A, et al. Adjuvant chemotherapy with sequential or concurrent anthracycline and docetaxel: Breast International Group 02-98 randomized trial. <i>J Natl Cancer Inst</i> 2008; <b>100</b> : 121-33.<br><br>Di Leo A, Francis P, Crown JP, et al. Overall survival benefit for sequential doxorubicin-docetaxel compared to concomitant doxorubicin and docetaxel in node-positive breast cancer. 8-year results of the Breast International Group (BIG) 2-98 phase III adjuvant trial. <i>Cancer Res</i> 2009; <b>69</b> : A601 (abstract). |
| 99K       | GEICAM 9906 Spain  | Rodriguez-Lescure A, Martin M, Ruiz A, et al. Subgroup analysis of GEICAM 9906 trial comparing six cycles of FE90C (FEC) to four cycles of FE90C followed by 8 weekly paclitaxel administrations (FECp): Relevance of HER2 and hormonal status (HR). <i>J Clin Oncol</i> 2007; <b>25</b> : A10598 (abstract).                                                                                                                                                                                                                                                         |
| 97R       | HE1097 Greece      | Fountzilas G, Skarlos D, Dafni U, et al. Postoperative dose-dense sequential chemotherapy with epirubicin, followed by CMF with or without paclitaxel, in patients with high-risk operable breast cancer: a randomized phase III study conducted by the Hellenic Cooperative Oncology Group. <i>Ann Oncol</i> 2005; <b>16</b> : 1762-71.                                                                                                                                                                                                                              |
| 00F1      | NCIC MA.21         | Burnell M, Levine MN, Chapman JAW, et al. Cyclophosphamide, epirubicin, and fluorouracil versus dose-dense epirubicin and cyclophosphamide followed by paclitaxel versus doxorubicin and cyclophosphamide followed by paclitaxel in node-positive or high-risk node-negative breast cancer. <i>J Clin Oncol</i> 2010; <b>28</b> : 77-82.                                                                                                                                                                                                                              |
| 00U       | AERO B-2000 France | Delbaldo C, Serin D, Mousseau M, et al. A phase III adjuvant randomized trial of 6 cycles of 5-fluorouracil - epirubicin-cyclophosphamide (FEC100) versus 4 FEC 100 followed by 4 taxol (FEC-T) in node positive breast cancer patients (trial B2000). <i>Cancer Res</i> 2010; <b>70</b> : P5-10-05 (abstract).                                                                                                                                                                                                                                                       |
| 03R       | GIM 1 Italy        | <a href="http://www.slidefinder.net/c/clinical_trials_breast_cancer_italy/8472086">http://www.slidefinder.net/c/clinical_trials_breast_cancer_italy/8472086</a>                                                                                                                                                                                                                                                                                                                                                                                                       |

**(c) Taxane-plus-anthracycline-based regimen (with taxane given CONCURRENTLY with other cytotoxic drugs) vs MORE (but < doubled) non-taxane cytotoxic chemotherapy**

| Year Code | Trial name        | Publication(s)                                                                                                                                                                                                                                                                                                                                                                            |
|-----------|-------------------|-------------------------------------------------------------------------------------------------------------------------------------------------------------------------------------------------------------------------------------------------------------------------------------------------------------------------------------------------------------------------------------------|
| 01E1+3    | PACS 04 France    | Roché H, Allouache D, Romieu G, et al. Five-year analysis of the FNCLCC-PACS04 trial: FEC100 vs ED75 for the adjuvant treatment of node positive breast cancer. <i>Cancer Res</i> 2009; <b>69</b> : A602 (abstract).                                                                                                                                                                      |
| 97L       | BCIRG 001         | Martin M, Pienkowski T, Mackey J, et al. Adjuvant docetaxel for node-positive breast cancer. <i>N Engl J Med</i> 2005; <b>352</b> : 2302-13.<br><br>Hugh J, Hanson J, Cheang MCU, et al. Breast cancer subtypes and response to docetaxel in node-positive breast cancer: Use of an immunohistochemical definition in the BCIRG 001 trial. <i>J Clin Oncol</i> 2009; <b>27</b> : 1168-76. |
| 99%       | GEICAM 9805 Spain | Martin M, Seguí MA, Antón A, et al. Adjuvant docetaxel for high-risk, node-negative breast cancer. <i>N Engl J Med</i> 2010; <b>363</b> : 2200-10.                                                                                                                                                                                                                                        |

|        |                     |                                                                                                                                                                                                                                                                                                                                                                                                                                                                                                                                                                                                                                                 |
|--------|---------------------|-------------------------------------------------------------------------------------------------------------------------------------------------------------------------------------------------------------------------------------------------------------------------------------------------------------------------------------------------------------------------------------------------------------------------------------------------------------------------------------------------------------------------------------------------------------------------------------------------------------------------------------------------|
| 98D2   | BIG 02-98           | Francis P, Crown J, Di Leo A, et al. Adjuvant chemotherapy with sequential or concurrent anthracycline and docetaxel: Breast International Group 02-98 randomized trial. <i>J Natl Cancer Inst</i> 2008; <b>100</b> : 121-33.<br><br>Di Leo A, Francis P, Crown JP, et al. Overall survival benefit for sequential doxorubicin-docetaxel compared to concomitant doxorubicin and docetaxel in node-positive breast cancer. 8-yr. Results of the Breast International Group (BIG) 2-98 phase III adjuvant trial. <i>Cancer Res</i> 2009; <b>69</b> : A601 (abstract).                                                                            |
| 99N    | RAPP-01 France      | Brain EGC, Bachelot T, Serin D, et al. Life-threatening sepsis associated with adjuvant doxorubicin plus docetaxel for intermediate-risk breast cancer. <i>JAMA</i> 2005; <b>293</b> : 2367-71.<br><br>Brain EG, Debled M, Eymard J, et al. Final results of the RAPP-01 phase III trial comparing doxorubicin and docetaxel with doxorubicin and cyclophosphamide in the adjuvant treatment of high-risk node negative and limited node positive (<=3) breast cancer patients. <i>Cancer Res</i> 2009; <b>69</b> : A4101.                                                                                                                      |
| 98T    | ECOG EST2197        | Goldstein LJ, O'Neill A, Sparano JA, et al. Concurrent doxorubicin plus docetaxel is not more effective than concurrent doxorubicin plus cyclophosphamide in operable breast cancer with 0 to 3 positive axillary nodes: North American Breast Cancer Intergroup trial E 2197. <i>J Clin Oncol</i> 2008; <b>26</b> : 4092-99.<br><br>Badve SS, Baehner FL, Gray RP, et al. Estrogen- and progesterone-receptor status in ECOG 2197: comparison of immunohistochemistry by local and central laboratories and quantitative reverse transcription polymerase chain reaction by central laboratory. <i>J Clin Oncol</i> 2008; <b>26</b> : 2473-81. |
| 96W1-2 | ECTO Italy          | Gianni L, Baselga J, Eiermann W, et al. Phase III trial evaluating the addition of paclitaxel to doxorubicin followed by cyclophosphamide, methotrexate, and fluorouracil, as adjuvant or primary systemic therapy: European Cooperative Trial in Operable Breast Cancer. <i>J Clin Oncol</i> 2009; <b>27</b> : 2474-81.                                                                                                                                                                                                                                                                                                                        |
| 96%    | Multicentre Germany | Kümmel S, Krockner J, Kohls A, et al. Randomised trial: survival benefit and safety of adjuvant dose-dense chemotherapy for node-positive breast cancer. <i>Br J Cancer</i> 2006; <b>94</b> : 1237-44.                                                                                                                                                                                                                                                                                                                                                                                                                                          |
| 96X    | GONO Italy MIG 5    | Del Mastro L, Costantini M, Durando A, et al. Cyclophosphamide, epirubicin, and 5-fluorouracil versus epirubicin plus paclitaxel in node-positive early breast cancer patients: A randomized, phase III study of Gruppo Oncologico Nord Ovest-Mammella Intergroup. <i>J Clin Oncol</i> 2008; <b>26</b> : 10s, A516 (abstract).                                                                                                                                                                                                                                                                                                                  |

**(d) Taxane-plus-anthracycline-based regimen (with taxane courses NOT overlapping with any other chemo. courses) vs DOUBLED (or ≈ doubled) non-taxane cytotoxic chemotherapy**

| Year Code | Trial name           | Publication(s)                                                                                                                                                                                                                                                                                                                                                                                                                                                                                                                                                                                            |
|-----------|----------------------|-----------------------------------------------------------------------------------------------------------------------------------------------------------------------------------------------------------------------------------------------------------------------------------------------------------------------------------------------------------------------------------------------------------------------------------------------------------------------------------------------------------------------------------------------------------------------------------------------------------|
| 01F       | TACT UK (Control A)  | Ellis P, Barrett-Lee P, Johnson L, et al. Sequential docetaxel as adjuvant chemotherapy for early breast cancer (TACT): an open-label, phase III, randomised controlled trial. <i>Lancet</i> 2009; <b>373</b> : 1681-92.<br><br>Tutt A, Gillett C, Pinder S, et al. Microtubule associated protein tau expression as a predictive and prognostic marker in a trial assessing sequential docetaxel as adjuvant chemotherapy for early breast cancer (TACT). <i>Cancer Res</i> 2009; <b>69</b> : A607 (abstract).                                                                                           |
| 01G       | TACT UK (Control B)  | Ellis P, Barrett-Lee P, Johnson L, et al. Sequential docetaxel as adjuvant chemotherapy for early breast cancer (TACT): an open-label, phase III, randomised controlled trial. <i>Lancet</i> 2009; <b>373</b> : 1681-92.<br><br>Tutt A, Gillett C, Pinder S, et al. Microtubule associated protein tau expression as a predictive and prognostic marker in a trial assessing sequential docetaxel as adjuvant chemotherapy for early breast cancer (TACT). <i>Cancer Res</i> 2009; <b>69</b> : A607 (abstract).                                                                                           |
| 01T       | LMU Munich ADEBAR    | Sommer HL, Jueckstock JK, Genes E, et al. Influence of sequencing of chemotherapy and radiotherapy regarding adverse effects of cytostatic treatment: Results of the ADEBAR trial. <i>J Clin Oncol</i> 2007; <b>25</b> : 17s, A559 (abstract).<br><br>Janni WJ, Harbeck N, Sommer H, et al. Sequential treatment with epirubicin/cyclophosphamide followed by docetaxel is equi-effective, but less toxic, than FEC120 in the adjuvant treatment of breast cancer patients with extensive lymph node involvement: The German ADEBAR phase III study. <i>Cancer Res</i> 2009; <b>69</b> : A604 (abstract). |
| 96F       | Aberdeen Scotland    | Walker LG, Walker MB, Anderson J, et al. Quality of life during primary chemotherapy for breast cancer with continuing cyclophosphamide, vincristine, adriamycin and prednisolone versus sequential docetaxel: a randomised trial. <i>Breast Cancer Res Treat</i> 2002; <b>76</b> : S52, A160 (abstract).                                                                                                                                                                                                                                                                                                 |
| 97J       | PACS 01 France       | Coudert B, Campone M, Spielmann M, et al. Benefit of the sequential administration of docetaxel after standard FEC regimen for node-positive breast cancer: long-term follow-up results of the FNCLCC-PACS 01 trial. <i>Cancer Res</i> 2009; <b>69</b> : A603 (abstract).                                                                                                                                                                                                                                                                                                                                 |
| 97A       | DEVA UK              | Coombes RC, Bliss JM, Espie M, et al. DEVA: Randomized trial of sequential epirubicin and docetaxel versus epirubicin alone in node-positive postmenopausal early breast cancer (EBC) patients. <i>J Clin Oncol</i> 2010; <b>28</b> : 76S, A536 (abstract).                                                                                                                                                                                                                                                                                                                                               |
| 94B       | MD Anderson          | Buzdar AU, Singletary SE, Valero V, et al. Evaluation of paclitaxel in adjuvant chemotherapy for patients with operable breast cancer: preliminary data of a prospective randomized trial. <i>Clin Cancer Res</i> 2002; <b>8</b> : 1073-79.                                                                                                                                                                                                                                                                                                                                                               |
| 00F2      | NCIC MA.21           | Burnell M, Levine MN, Chapman JAW, et al. Cyclophosphamide, epirubicin, and fluorouracil versus dose-dense epirubicin and cyclophosphamide followed by paclitaxel versus doxorubicin and cyclophosphamide followed by paclitaxel in node-positive or high-risk node-negative breast cancer. <i>J Clin Oncol</i> 2010; <b>28</b> : 77-82.                                                                                                                                                                                                                                                                  |
| 02D       | GBG 42 / NNBC 3-Eur. | Thomssen C, Kantelhardt EJ, Plueckhahn K, et al. Report of toxicities from the multicenter, randomized NNBC 3-Europe trial: 6xFEC versus 3xFEC-3xDoc for high-risk node-negative breast cancer patients. <i>J Clin Oncol</i> 2010; <b>28</b> : 80S, A554 (abstract).<br><br>Kantelhardt EJ, Thomssen C, Vetter M, et al. Molecular types and prognostic markers uPA/PAI-1 for 2,497 early breast cancer patients in the multicenter, randomized NNBC 3-Europe trial. <i>J Clin Oncol</i> 2010; <b>28</b> : A10539.                                                                                        |

**(e) Taxane trial with no anthracycline in one allocation**

| Year Code | Trial name    | Publication(s)                                                                                                                                                                                                                                                                 |
|-----------|---------------|--------------------------------------------------------------------------------------------------------------------------------------------------------------------------------------------------------------------------------------------------------------------------------|
| 00S       | WSG/AGO AM-02 | Nitz U, Huober J, Lisboa B, et al. Superiority of sequential docetaxel over standard FE100C in patients with intermediate risk breast cancer: survival results of the randomized intergroup phase III trial EC-Doc. <i>Cancer Res</i> 2009; <b>69</b> : A78 (abstract).        |
| 97N       | USO 97-35     | Jones S, Holmes FA, O'Shaughnessy J, et al. Docetaxel with cyclophosphamide is associated with an overall survival benefit compared with doxorubicin and cyclophosphamide: 7-year follow-up of US Oncology Research Trial 9735. <i>J Clin Oncol</i> 2009; <b>27</b> : 1177-83. |

**Trials of any anthracycline-based regimen vs. standard CMF (or near-standard CMF) (see webappendix page 29):**

**(a) Anthracycline dose/cycle  $\geq$  A60 or E90**

**i. Cumulative anthracycline dose A360 or E720-800**

| Year Code | Trial name       | Publication(s)                                                                                                                                                                                                                                                                                                                                                  |
|-----------|------------------|-----------------------------------------------------------------------------------------------------------------------------------------------------------------------------------------------------------------------------------------------------------------------------------------------------------------------------------------------------------------|
| 88R       | Brussels Belgium | Bernard Marty C, Mano M, Paesmans M, et al. Second malignancies following adjuvant chemotherapy: 6-year results from a Belgian randomized study comparing cyclophosphamide, methotrexate and 5-fluorouracil (CMF) with an anthracycline-based regimen in adjuvant treatment of node-positive breast cancer patients. <i>Ann Oncol</i> 2003; <b>14</b> : 693-98. |
| 89R       | NCIC MA.5        | Pritchard KI, Shepherd LE, O'Malley FP, et al. <i>HER2</i> and responsiveness of breast cancer to adjuvant chemotherapy. <i>N Engl J Med</i> 2006; <b>354</b> : 2103-11.                                                                                                                                                                                        |
| 89B2      | SWOG 8897        | Hutchins LF, Green SJ, Ravdin PM, et al. Randomized, controlled trial of cyclophosphamide, methotrexate, and fluorouracil versus cyclophosphamide, doxorubicin, and fluorouracil with and without tamoxifen for high-risk, node-negative breast cancer: treatment results of Intergroup protocol INT-0102. <i>J Clin Oncol</i> 2005; <b>23</b> : 8313-21.       |

**ii. Cumulative anthracycline dose A300 or E400-480**

| Year Code | Trial name        | Publication(s)                                                                                                                                                                                                                                                                                                                                                                                                                                                                                                                                                                                                                                                                                                                                                              |
|-----------|-------------------|-----------------------------------------------------------------------------------------------------------------------------------------------------------------------------------------------------------------------------------------------------------------------------------------------------------------------------------------------------------------------------------------------------------------------------------------------------------------------------------------------------------------------------------------------------------------------------------------------------------------------------------------------------------------------------------------------------------------------------------------------------------------------------|
| 86S       | GOCCNE Italy      | Galligioni E, Cetto G, Nascimben O, et al. High dose epirubicin and cyclophosphamide (EC) vs cyclophosphamide, methotrexate, fluorouracil (CMF) as adjuvant chemotherapy in high risk premenopausal breast cancer patients (PTS). A prospective randomized trial. <i>Eur J Cancer</i> 1998; <b>34</b> (suppl 1): 84 (abstract).                                                                                                                                                                                                                                                                                                                                                                                                                                             |
| 97G       | FM Italy GMB1     | <i>Personal communication</i>                                                                                                                                                                                                                                                                                                                                                                                                                                                                                                                                                                                                                                                                                                                                               |
| 90Z       | GOIRC SANG2 Italy | Colozza M, Bisagni G, Mosconi AM, et al. Epirubicin versus CMF as adjuvant therapy for stage I and II breast cancer: a prospective randomised study. <i>Eur J Cancer</i> 2002; <b>38</b> : 2279-88.                                                                                                                                                                                                                                                                                                                                                                                                                                                                                                                                                                         |
| 84K1      | GUN-3 Naples      | De Placido S, Perrone F, Carlomagno C, et al. CMF vs alternating CMF/EV in the adjuvant treatment of operable breast cancer. A single centre randomised clinical trial (Naples GUN-3 study). <i>Br J Cancer</i> 1995; <b>71</b> : 1283-87.                                                                                                                                                                                                                                                                                                                                                                                                                                                                                                                                  |
| 96N       | GOCSI MAM2 Italy  | De Matteis A, De Laurentiis M, Nuzzo F, et al. Preliminary results from the IMPACT-B01/MAM2 GOCSI randomized trial of adjuvant therapy for breast cancer. <i>Ann Oncol</i> 2002; <b>13</b> : 16, A53 (abstract).                                                                                                                                                                                                                                                                                                                                                                                                                                                                                                                                                            |
| 96A       | NEAT, UK          | Earl HM, Hiller L, Dunn JA, et al. NEAT: National Epirubicin Adjuvant Trial-toxicity, delivered dose intensity and quality of life. <i>Br J Cancer</i> 2008; <b>99</b> : 1226-31.                                                                                                                                                                                                                                                                                                                                                                                                                                                                                                                                                                                           |
| 97U1+2    | IBIS 03 Italy     | Cyclophosphamide, Methotrexate, and Fluorouracil, With or Without Epirubicin Hydrochloride, in Treating Women Who Have Undergone Surgery for Breast Cancer [Internet] 2009 [updated 2009 Dec 13; cited 2011 Jun 16]. Available from: <a href="http://clinicaltrials.gov/ct2/show/study/NCT01031030?term=ibis+03&amp;rank=1">http://clinicaltrials.gov/ct2/show/study/NCT01031030?term=ibis+03&amp;rank=1</a><br><br>Amadori D, Silvestrini R, De Lena M, et al. Randomized phase III trial of adjuvant epirubicin followed by cyclophosphamide, methotrexate, and 5-fluorouracil (CMF) versus CMF followed by epirubicin in patients with node-negative or 1-3 node-positive rapidly proliferating breast cancer. <i>Breast Cancer Res Treat</i> 2011; <b>125</b> : 775-84. |
| 91Q       | GOCSI MAM1 Italy  | De Placido S, De Laurentiis M, De Lena M, et al. A randomised factorial trial of sequential doxorubicin and CMF vs CMF and chemotherapy alone vs chemotherapy followed by goserelin plus tamoxifen as adjuvant treatment of node-positive breast cancer. <i>Br J Cancer</i> 2005; <b>92</b> : 467-74.                                                                                                                                                                                                                                                                                                                                                                                                                                                                       |

**iii. Cumulative anthracycline dose A240**

| Year Code | Trial name | Publication(s)                                                                                                                                                                                                                                                                                                                                  |
|-----------|------------|-------------------------------------------------------------------------------------------------------------------------------------------------------------------------------------------------------------------------------------------------------------------------------------------------------------------------------------------------|
| 84B1      | NSABP B-15 | Wickerham D, Fisher B, Brown A, et al. Two months of adriamycin + cyclophosphamide (AC) with and without interval reinduction therapy vs 6 months of conventional CMF in positive node breast cancer patients (pts) nonresponsive to tamoxifen: results of NSABP B-15. <i>Proc Annu Meet Am Soc Clin Oncol</i> 1990; <b>9</b> : A73 (abstract). |
| 84B2      | NSABP B-15 | Wickerham D, Fisher B, Brown A, et al. Two months of adriamycin + cyclophosphamide (AC) with and without interval reinduction therapy vs 6 months of conventional CMF in positive node breast cancer patients (pts) nonresponsive to tamoxifen: results of NSABP B-15. <i>Proc Annu Meet Am Soc Clin Oncol</i> 1990; <b>9</b> : A73 (abstract). |
| 91H       | NSABP B-23 | Fisher B, Anderson S, Tan Chiu E, et al. Tamoxifen and chemotherapy for axillary node-negative, estrogen receptor-negative breast cancer: findings from National Surgical Adjuvant Breast and Bowel Project B-23. <i>J Clin Oncol</i> 2001; <b>19</b> : 931-42.                                                                                 |

**(b) Anthracycline dose/cycle < A60 or E90**

| Year Code | Trial name       | Publication(s)                                                                                                                                                                                                                                                                                                                                                         |
|-----------|------------------|------------------------------------------------------------------------------------------------------------------------------------------------------------------------------------------------------------------------------------------------------------------------------------------------------------------------------------------------------------------------|
| 78L2      | ONCOFRANCE       | Misset JL, di Palma M, Delgado M, et al. Adjuvant treatment of node-positive breast cancer with cyclophosphamide, doxorubicin, fluorouracil, and vincristine versus cyclophosphamide, methotrexate, and fluorouracil: final report after a 16-year median follow-up duration. <i>J Clin Oncol</i> 1996; <b>14</b> : 1136-45.                                           |
| 88R       | Brussels Belgium | Bernard Marty C, Mano M, Paesmans M, et al. Second malignancies following adjuvant chemotherapy: 6-year results from a Belgian randomized study comparing cyclophosphamide, methotrexate and 5-fluorouracil (CMF) with an anthracycline-based regimen in adjuvant treatment of node-positive breast cancer patients. <i>Ann Oncol</i> 2003; <b>14</b> : 693-98.        |
| 94J1+2+3  | GOIRC SANG 2B R1 | <i>Personal communication</i>                                                                                                                                                                                                                                                                                                                                          |
| 84L       | ICCG C/2/84 UK   | Coombes RC, Bliss JM, Wils J, et al. Adjuvant cyclophosphamide, methotrexate, and fluorouracil versus fluorouracil, epirubicin, and cyclophosphamide chemotherapy in premenopausal women with axillary node-positive operable breast cancer: results of a randomized trial. The International Collaborative Cancer Group. <i>J Clin Oncol</i> 1996; <b>14</b> : 35-45. |
| 80C1      | SE Sweden BCG A  | Hrafinkelsson J, Nilsson K, Soderberg M. Tolerance of radiotherapy combined with adjuvant chemotherapy in breast cancer. <i>Acta Oncol</i> 1987; <b>26</b> : 269-72.                                                                                                                                                                                                   |
| 84N       | ICCG C/6/89 UK   | Marty M, Hall E, Wils J, et al. Evaluation of tolerability of CMF versus FEC in a randomised trial in node negative poor risk primary breast cancer patients. <i>Proc Annu Meet Am Soc Clin Oncol</i> 2002; <b>21</b> : 69a, A273 (abstract).                                                                                                                          |

**[End of anthracycline vs CMF; anthracycline vs nil follows]**

**Trials of Anthracycline-based regimen vs. No chemotherapy (see webappendix page 35):**

**(a) Anthracycline dose/cycle exactly A60 or E90**

| Year Code | Trial Name      | Publication(s)                                                                                                                                                                                                                                                                                                                                                       |
|-----------|-----------------|----------------------------------------------------------------------------------------------------------------------------------------------------------------------------------------------------------------------------------------------------------------------------------------------------------------------------------------------------------------------|
| 89B1      | SWOG 8814       | Albain KS, Barlow WE, Ravdin PM, et al. Adjuvant chemotherapy and timing of tamoxifen in postmenopausal patients with endocrine-responsive, node-positive breast cancer: a phase 3, open-label, randomised controlled trial. <i>Lancet</i> 2009; <b>374</b> : 2055-63.                                                                                               |
| 92D       | Amsterdam C9203 | Nortier JWR; Slee PHT; Veenhof CHN, et al. Adjuvant Tamoxifen plus combination chemotherapy with epirubicin and cyclophosphamide versus tamoxifen alone in postmenopausal node-positive breast cancer patients. Amsterdam Integraal Kankercentrum, The Netherlands, Sep 1993. (Protocol 12706, supplied by trialists)                                                |
| 93H       | IBCSG 11-93     | Thürlimann B, Price KN, Gelber RD, et al. Is chemotherapy necessary for premenopausal women with lower-risk node-positive, endocrine responsive breast cancer? 10-year update of International Breast Cancer Study Group Trial 11-93. <i>Breast Cancer Res Treat</i> 2009; <b>113</b> : 137-44.                                                                      |
| 93M1+2    | IBCSG 12-93     | International Breast Cancer Study Group. Toremifene and tamoxifen are equally effective for early-stage breast cancer: first results of International Breast Cancer Study Group Trials 12-93 and 14-93. <i>Ann Oncol</i> 2004; <b>15</b> :1749-1759                                                                                                                  |
| 84C       | NSABP B-16      | Fisher B, Redmond C, Legault Poisson S, et al. Postoperative chemotherapy and tamoxifen compared with tamoxifen alone in the treatment of positive node breast cancer patients aged 50 years and older with tumors responsive to tamoxifen: Results from the National Surgical Adjuvant Breast and Bowel Project B-16. <i>J Clin Oncol</i> 1990; <b>8</b> : 1005-18. |

**(b) Anthracycline dose/cycle < A60 or E90, sorted by cumulative dose**

| Year Code | Trial Name       | Publication(s)                                                                                                                                                                                                                                                                                                                                                                                                                                                                                                                                                                                                                                                                       |
|-----------|------------------|--------------------------------------------------------------------------------------------------------------------------------------------------------------------------------------------------------------------------------------------------------------------------------------------------------------------------------------------------------------------------------------------------------------------------------------------------------------------------------------------------------------------------------------------------------------------------------------------------------------------------------------------------------------------------------------|
| 76H1      | West Midlands UK | Morrison JM, Howell A, Kelly KA, et al. West Midlands Oncology Association trials of adjuvant chemotherapy in operable breast cancer: Results after a median follow up of 7 years. I Patients with involved axillary lymph nodes. <i>Br J Cancer</i> 1989; <b>60</b> : 911-18.                                                                                                                                                                                                                                                                                                                                                                                                       |
| 76L1      | Cologne          | <i>Personal communication</i>                                                                                                                                                                                                                                                                                                                                                                                                                                                                                                                                                                                                                                                        |
| 74D1      | DFCI 74-063      | Henderson IC, Gelman R, Parker LM, et al. 15 vs. 30 weeks (wks) of adjuvant chemotherapy for breast cancer patients (pts) with a high risk of recurrence: A randomized trial. <i>Proc Ann Meet Am Soc Clin Oncol</i> 1982: C-290 (abstract).                                                                                                                                                                                                                                                                                                                                                                                                                                         |
| 80B3+4    | N Sweden BCG     | <i>Personal communication</i>                                                                                                                                                                                                                                                                                                                                                                                                                                                                                                                                                                                                                                                        |
| 80C2      | SE Sweden BCG B  | Hrafinkelsson J, Nilsson K, Soderberg M. Tolerance of radiotherapy combined with adjuvant chemotherapy in breast cancer. <i>Acta Oncol</i> 1987; <b>26</b> : 269-72.                                                                                                                                                                                                                                                                                                                                                                                                                                                                                                                 |
| 80S1      | Helsinki         | Blomqvist C, Tiusanen K, Elomaa I, et al. The combination of radiotherapy, adjuvant chemotherapy (cyclophosphamide doxorubicin fluorouracil) and tamoxifen in stage II breast cancer. Long term follow up results of a randomised trial. <i>Br J Cancer</i> 1992; <b>66</b> : 1171-76.                                                                                                                                                                                                                                                                                                                                                                                               |
| 84C2      | NSABP B-16       | Fisher B, Redmond C, Legault Poisson S, et al. Postoperative chemotherapy and tamoxifen compared with tamoxifen alone in the treatment of positive node breast cancer patients aged 50 years and older with tumors responsive to tamoxifen: Results from the National Surgical Adjuvant Breast and Bowel Project B-16. <i>J Clin Oncol</i> 1990; <b>8</b> : 1005-18.                                                                                                                                                                                                                                                                                                                 |
| 80Z       | Southampton UK   | Williams CJ, Buchanan RB, Hall V, Taylor I. Adjuvant chemotherapy for T1-2, N0, M0 estrogen receptor (ER) negative breast cancer: preliminary results of a randomized trial. Fifth International Conference on the Adjuvant Therapy of Cancer. March 11-14 1987, Tucson, Arizona. page 46 (abstract).                                                                                                                                                                                                                                                                                                                                                                                |
| 94F       | JCOG 9401        | <i>Personal communication</i>                                                                                                                                                                                                                                                                                                                                                                                                                                                                                                                                                                                                                                                        |
| 89D       | IGR Paris        | Arriagada R, Spielmann M, Koscielny S, et al. Patterns of failure in a randomized trial of adjuvant chemotherapy in postmenopausal patients with early breast cancer treated with tamoxifen. <i>Ann Oncol</i> 2002; <b>13</b> : 1378-1386<br><br>Arriagada R, Spielmann M, Koscielny S et al. Results of two randomized trials evaluating adjuvant anthracycline-based chemotherapy in 1146 patients with early breast cancer. <i>Acta Oncol</i> 2005; <b>44</b> : 458-466<br><br>Andre F, Khalil A, Slimane K, et al. Mitotic index and benefit of adjuvant anthracycline-based chemotherapy in patients with early breast cancer. <i>J Clin Oncol</i> 2005; <b>23</b> : 2996-3000. |
| 83B       | GROCTA I Italy   | Boccardo F, Rubagotti A, Amoroso D, et al. Italian Breast Cancer Adjuvant Chemo-Hormone Therapy Cooperative Group Trials. GROCTA Trials. <i>Recent Results Cancer Res</i> 1998; <b>152</b> : 453-70.                                                                                                                                                                                                                                                                                                                                                                                                                                                                                 |
| 86P2      | FASG GFEA 02     | Namer M, Fargeot P, Roche H, et al. Improved disease-free survival with epirubicin-based chemoendocrine adjuvant therapy compared with tamoxifen alone in one to three node-positive, estrogen-receptor-positive, postmenopausal breast cancer patients: results of French Adjuvant Study Group 02 and 07 trials. <i>Ann Oncol</i> 2006; <b>17</b> : 65-73.                                                                                                                                                                                                                                                                                                                          |
| 86P3      | FASG GFEA 03     | Hery M, Bonnetterre J, Roche H, et al. Epirubicin-based chemotherapy as adjuvant treatment for poor prognosis, node-negative breast cancer: 10-year follow-up results of the French Adjuvant Study Group 03 trial. <i>Bull Cancer</i> 2006; <b>93</b> : E109-14.                                                                                                                                                                                                                                                                                                                                                                                                                     |
| 89@1      | Bari Italy       | Paradiso A, Schittulli F, Cellamare G, et al. Randomized clinical trial of adjuvant fluorouracil, epirubicin, and cyclophosphamide chemotherapy for patients with fast-proliferating, node-negative breast cancer. <i>J Clin Oncol</i> 2001; <b>19</b> : 3929-37.                                                                                                                                                                                                                                                                                                                                                                                                                    |
| 90C6      | FASG GFEA 07     | Namer M, Fargeot P, Roche H, et al. Improved disease-free survival with epirubicin-based chemoendocrine adjuvant therapy compared with tamoxifen alone in one to three node-positive, estrogen-receptor-positive, postmenopausal breast cancer patients: results of French Adjuvant Study Group 02 and 07 trials. <i>Ann Oncol</i> 2006; <b>17</b> : 65-73.                                                                                                                                                                                                                                                                                                                          |
| 96E       | Austrian BCSG IX | Taucher S, Salat A, Gnant M, et al. Impact of pretreatment thrombocytosis on survival in primary breast cancer. <i>Thromb Haemost</i> 2003; <b>89</b> : 1098-1106.                                                                                                                                                                                                                                                                                                                                                                                                                                                                                                                   |
| 82F       | MD Anderson 8227 | <i>Personal communication</i>                                                                                                                                                                                                                                                                                                                                                                                                                                                                                                                                                                                                                                                        |

**(c) Lower cumulative anthracycline dose**

| Year Code | Trial Name      | Publication                                                                                                                                                                                                            |
|-----------|-----------------|------------------------------------------------------------------------------------------------------------------------------------------------------------------------------------------------------------------------|
| 84Q4+5    | Austrian BCSG 4 | Jakesz R, Hausmaninger H, et al. Randomized trial of low-dose chemotherapy added to tamoxifen in patients with receptor-positive and lymph node-positive breast cancer. <i>J Clin Oncol</i> 1999; <b>17</b> : 1701-09. |

## Trials of Standard CMF vs. No chemotherapy (see webappendix page 41):

| Year Code | Trial name       | Publication(s)                                                                                                                                                                                                                                                                                                                                                                                                                    |
|-----------|------------------|-----------------------------------------------------------------------------------------------------------------------------------------------------------------------------------------------------------------------------------------------------------------------------------------------------------------------------------------------------------------------------------------------------------------------------------|
| 73B       | INT Milan 7205   | Bonadonna G, Zambetti M, Moliterni A, et al. Clinical relevance of different sequencing of doxorubicin and cyclophosphamide, methotrexate, and fluorouracil in operable breast cancer. <i>J Clin Oncol</i> 2004; <b>22</b> :1614-20.<br><br>Bonadonna G, Moliterni A, Zambetti M, et al. 30 years' follow up of randomised studies of adjuvant CMF in operable breast cancer: cohort study. <i>BMJ</i> 2005; <b>330</b> : 217-23. |
| 78K3      | IBCSG/Ludwig III | Pagani O, Price KN, Gelber RD, et al. Patterns of recurrence of early breast cancer according to estrogen receptor status: A therapeutic target for a quarter of a century. <i>Breast Cancer Res Treat</i> 2009; <b>117</b> : 319-324.                                                                                                                                                                                            |
| 78V2      | ECOG EST6177     | Taylor SG, Knuiiman MW, Sleeper LA, et al. Six-year results of the Eastern Cooperative Oncology Group trial of observation versus CMFP versus CMFPT in postmenopausal patients with node-positive breast cancer. <i>J Clin Oncol</i> 1989; <b>7</b> : 879-89.                                                                                                                                                                     |
| 79U1+3    | Vienna Gyn.      | Kubista E, Salzer H, Fischl F, et al. [Treatment of breast cancer at the 1st Gynecology Clinic at the University of Vienna]. <i>Wien Med Wochenschr</i> 1984; <b>134</b> : 251-5.                                                                                                                                                                                                                                                 |
| 81H       | EST1180/SW.8294  | Mansour EG, Gray R, Shatila AH, et al. Efficacy of adjuvant chemotherapy in high-risk node-negative breast cancer. An Intergroup study. <i>N Engl J Med</i> 1989; <b>320</b> : 485-90.                                                                                                                                                                                                                                            |
| 86H2      | IBCSG VII        | The International Breast Cancer Study Group. Effectiveness of adjuvant chemotherapy in combination with tamoxifen for node-positive postmenopausal breast cancer patients. <i>J Clin Oncol</i> 1997; <b>15</b> : 1385-93.                                                                                                                                                                                                         |
| 88C       | NSABP B-20       | Mamounas EP, Tang G, Fisher B, et al. Association between the 21-gene recurrence score assay and risk of locoregional recurrence in node-negative, estrogen receptor-positive breast cancer: results from NSABP B-14 and NSABP B-20. <i>J Clin Oncol</i> 2010; <b>28</b> : 1677-83.                                                                                                                                               |
| 89A2      | SITAM-01         | Belfiglio M, Mari E, Nicolucci A, et al. Sitam-01 adjuvant breast trial for patients > 50 years. <i>Eur J Cancer</i> 1996; <b>32</b> (suppl 1): 21 (abstract).                                                                                                                                                                                                                                                                    |
| 89E4+9    | GROCTA V Italy   | Boccardo F, Rubagotti A, Amoroso D, et al. Italian Breast Cancer Adjuvant Chemo-Hormone Therapy Cooperative Group Trials. GROCTA Trials. <i>Recent Results Cancer Res</i> 1998; <b>152</b> : 453-70.                                                                                                                                                                                                                              |
| 89V       | Romagnolo Italy  | Amadori D, Nanni O, Volpi A, et al. Phase III randomized multicenter study on the effects of adjuvant CMF in patients with node-negative, rapidly proliferating breast cancer: twelve-year results and retrospective subgroup analysis. <i>Breast Cancer Res Treat</i> 2008; <b>108</b> : 259-64.                                                                                                                                 |
| 90P       | Amsterdam C8913  | <i>Personal communication</i>                                                                                                                                                                                                                                                                                                                                                                                                     |
| 90S       | IBCSG VIII       | Karlsson P, Sun Z, Braun D, et al. Long term results of International Breast Cancer Study Group Trial VIII: adjuvant chemotherapy plus goserelin compared with either therapy alone for premenopausal patients with node-negative breast cancer. <i>Ann Oncol</i> 2011; <b>22</b> : 2216-26.                                                                                                                                      |

## Trials of Anthracycline Dosage (see webappendix page 47):

### (a) Unconfounded comparisons

| Year Code | Trial name     | Publication(s)                                                                                                                                                                                                                                                                                                                                                                                                                                                                                                                                                                                                                               |
|-----------|----------------|----------------------------------------------------------------------------------------------------------------------------------------------------------------------------------------------------------------------------------------------------------------------------------------------------------------------------------------------------------------------------------------------------------------------------------------------------------------------------------------------------------------------------------------------------------------------------------------------------------------------------------------------|
| 86P1      | FASG GFEA 01   | Benchalal M, Le Prise E, De Lafontan B, et al. Influence of the time between surgery and radiotherapy on local recurrence in patients with lymph node-positive, early-stage, invasive breast carcinoma undergoing breast-conserving surgery: Results of the French Adjuvant Study Group. <i>Cancer</i> 2005; <b>104</b> : 240-250.<br><br>Fumoleau P, Devaux Y, Vo-Van ML, et al. Premenopausal patients with node positive resectable breast cancer: a randomized trial comparing three adjuvant regimens: FEC50 x 6 cycles vs FEC50 x 3 cycles vs FEC75 x 3 cycles, preliminary results. <i>Ann Oncol</i> 1992; <b>3</b> : 203 (abstract). |
| 90C3+5    | FASG GFEA 05   | Bonnetterre J, Roche H, Kerbrat P, et al. French Adjuvant Study Group 05 trial (FEC 50 vs FEC 100): 10-year update of benefit/risk ratio after adjuvant chemotherapy (CT) in node-positive (N+), early breast cancer (EBC) patients (pts). <i>Proc Annu Meet Am Soc Clin Oncol</i> 2003; <b>22</b> : 24, A93 (abstract).<br><br>Bonnetterre JM, French Adjuvant Study Group. Long-term efficacy and toxicity of the FEC100 regimen. <i>Oncology (Williston Park)</i> 2004; <b>18</b> (14), suppl 14: 56-58.                                                                                                                                  |
| 92N       | ICCG C/9/91 UK | Bliss JM, Wils J, Marty M, et al. Evaluation of the tolerability of FE50C versus FE75C in a prospective randomised trial in adjuvant breast cancer patients. <i>Proc Annu Meet Am Soc Clin Oncol</i> 2002; <b>21</b> : 51b, A2017 (abstract).                                                                                                                                                                                                                                                                                                                                                                                                |
| 94D1&2    | CALGB 9344     | Henderson IC, Berry DA, Demetri GD, et al. Improved outcomes from adding sequential paclitaxel but not from escalating doxorubicin dose in an adjuvant chemotherapy regimen for patients with node-positive primary breast cancer. <i>J Clin Oncol</i> 2003; <b>21</b> : 976-83.<br><br>Berry DA, Thor A, Jewell SD, et al. Benefits of adding paclitaxel to adjuvant doxorubicin/cyclophosphamide depending on HER2 & ER status: analysis of tumor tissue microarrays and immunohistochemistry in CALGB 9344 (Intergroup 0148). <i>Cancer Res</i> 2009; <b>69</b> : A606 (abstract).                                                        |

### (b) Confounded comparisons

| Year Code | Trial name       | Publication(s)                                                                                                                                                                                                                                                                                                                                                                                                                              |
|-----------|------------------|---------------------------------------------------------------------------------------------------------------------------------------------------------------------------------------------------------------------------------------------------------------------------------------------------------------------------------------------------------------------------------------------------------------------------------------------|
| 85A       | CALGB CLB-8541   | Muss HB, Berry DA, Cirincione C, et al. Toxicity of older and younger patients treated with adjuvant chemotherapy for node-positive breast cancer: the Cancer and Leukemia Group B experience. <i>J Clin Oncol</i> 2007; <b>25</b> : 3699-3704.<br><br>Wood WC, Budman DR, Korzun AH, et al. Dose and dose intensity of adjuvant chemotherapy for stage II, node positive breast carcinoma. <i>N Engl J Med</i> 1994; <b>330</b> : 1253-59. |
| 88R       | Brussels Belgium | Bernard Marty C, Mano M, Paesmans M, et al. Second malignancies following adjuvant chemotherapy: 6-year results from a Belgian randomized study comparing cyclophosphamide, methotrexate and 5-fluorouracil (CMF) with an anthracycline-based regimen in adjuvant treatment of node-positive breast cancer patients. <i>Ann Oncol</i> 2003; <b>14</b> : 693-98.                                                                             |
| 00F       | NCIC MA21        | Burnell M, Levine MN, Chapman JAW, et al. Cyclophosphamide, epirubicin, and fluorouracil versus dose-dense epirubicin and cyclophosphamide followed by paclitaxel versus doxorubicin and cyclophosphamide followed by paclitaxel in node-positive or high-risk node-negative breast cancer. <i>J Clin Oncol</i> 2010; <b>28</b> : 77-82.                                                                                                    |

[End of webappendix]

**Local and systemic therapies:  
several MODERATE survival gains**

**MODERATE improvements in early detection,  
in local control, in endocrine therapy and  
in chemotherapy have, in aggregate,  
SUBSTANTIALLY reduced national mortality rates**

**UK 1950–2009 and USA (to 2008):  
Breast cancer mortality at ages 35–69**

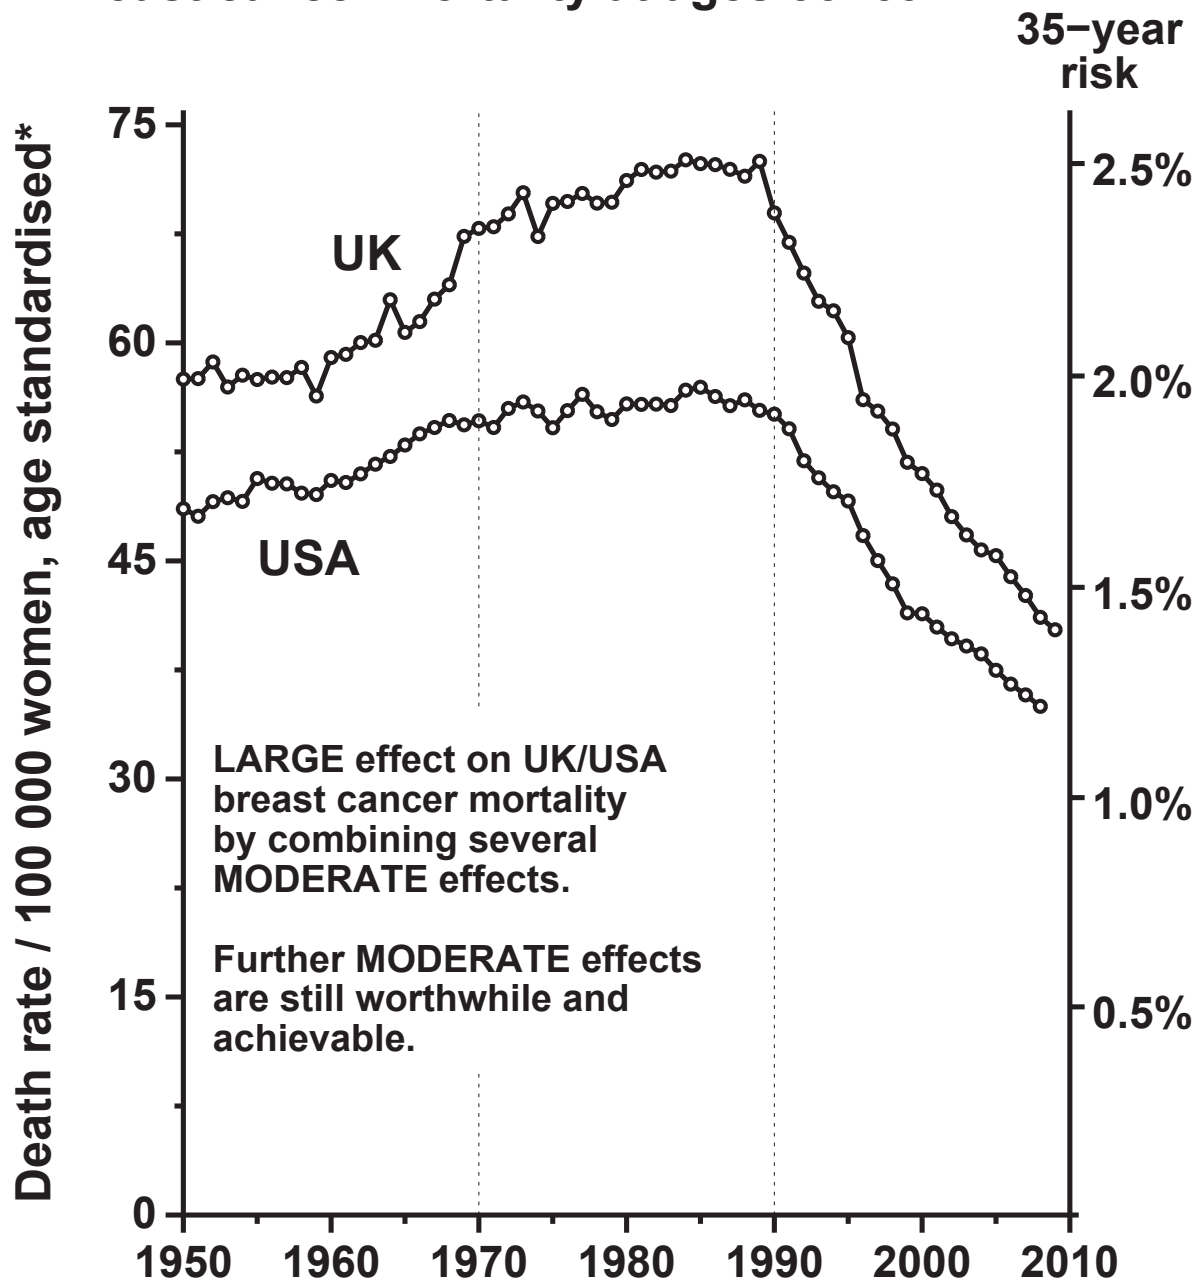

\*Mean of annual rates in the seven component 5-year age groups

WHO (& 2008 US NCHS) mortality and UN population estimates

**Reliable assessment of MODERATE differences in LONG-TERM survival by the 5-yearly worldwide overview (with tens of thousands randomised)**

**Need all the main randomised trial results, both to get big enough numbers and to avoid undue emphasis on particular studies**



# **Early Breast Cancer Trialists' Collaborative Group (EBCTCG)**

**So as not to miss any MODERATE  
differences in long-term survival,  
the world's trialists have shared  
their data every 5 years since 1985**

**1985, 1990, 1995, 2000, 2005, 2010**

# 620 names of EBCTCG collaborators in local and systemic therapy trials, listed alphabetically by institution, then name. Lancet 2011; 378: 771-84.

ACETBC, Tokyo, Japan O Abe, R Abe, K Enomoto, K Kikuchi, H Koyama, H Masuda, Y Nomura, Y Ohashi, K Sakai, K Sugimachi, M Toi, T Tomimaga, Y Uchino, M Yoshida. *Addenbrooke's Hospital, Cambridge, UK* J L Haybittle. *Anglo-Celtic Cooperative Oncology Group, UK* C F Leonard. *ARCOSEIN Group, France* G Calais, P Geraud. *ATLAS Trial Collaborative Study Group, Oxford, UK* V Collett, C Davies, A Delmestri, J Sayer. *Auckland Breast Cancer Study Group, New Zealand* V J Harvey, I M Holdaway, R G Kay, B H Mason. *Australian New Zealand Breast Cancer Trials Group, Sydney, Australia* J F Forbes, N Wilcken. *Austrian Breast Cancer Study Group, Vienna, Austria* R Bartsch, P Dubsky, C Fesl, H Fohler, M Gnant, R Greil, R Jakesz, A Lang, G Luschin-Ebengreuth, C Marth, B Mlineritsch, H Samonigg, C F Singer, G G Steger, H Stoger. *Beatson Oncology Centre, Glasgow, UK* P Canney, H M A Yosef. *Belgian Adjuvant Breast Cancer Project, Liège, Belgium* C Focan. *Berlin-Buch Akademie der Wissenschaften, Germany* U Peek. *Birmingham General Hospital, UK* G D Oates, J Powell. *Bordeaux Institut Bergonié, France* M Durand, L Mauriac. *Bordet Institute, Brussels, Belgium* A Di Leo, S Dolci, D Larsimont, J M Nogaret, C Philippson, M J Piccart. *Bradford Royal Infirmary, UK* M B Masood, D Parker, J J Price. *Breast Cancer International Research Group (BCIRG)* M A Lindsay, J Mackey, M Martin. *Breast Cancer Study Group of the Comprehensive Cancer Centre, Limburg, Netherlands* P S G J Hupperets. *British Association of Surgical Oncology BASO II Trialists, London, UK* T Bates, R W Blamey, U Chetty, I O Ellis, E Mallon, D A L Morgan, J Patnick, S Pinder. *British Columbia Cancer Agency, Vancouver, Canada* I Olivotto, J Ragaz. *Cancer and Leukemia Group B, Washington DC, USA* D Berry, G Broadwater, C Cirincione, H Muss, L Norton, R B Weiss. *Cancer Care Ontario, Canada* H T Abu-Zahra. *Cancer Research Centre of the Russian Academy of Medical Sciences, Moscow, Russia* S M Portnoj. *Cancer Research UK Clinical Trials Unit (CRCTU), NCR, Birmingham, UK* S Bowden, C Brookes, J Dunn, I Fernando, M Lee, C Poole, D Rea, D Spooner. *Cardiff Trialists Group, UK* P J Barrett-Lee, R E Mansel, I J Monypenny. *Case Western Reserve University, Cleveland, OH, USA* N H Gordon. *Central Oncology Group, Milwaukee, WI, USA* H L Davis. *Centre for Cancer Prevention, Wolfson Institute of Preventive Medicine, Queen Mary, University of London, UK* J Czucik. *Centre Léon-Bérard, Lyon, France* Y Lehingue, P Romestaing. *Centre Paul Lamarque, Montpellier, France* J B Dubois. *Centre Regional François Baclesse, Caen, France* T Delozier, B Griffon, J Mace Lescac'h. *Centre René Huguenin, Paris, St Cloud, France* P Rambert. *Centro Oncologico, Trieste, Italy* G Mustacchi. *Charles University in Prague, First Faculty of Medicine, Department of Oncology of the First Faculty of Medicine and General Teaching Hospital, Czech Republic* L Petruzelka, O Pribylova. *Cheltenham General Hospital, UK* J R Owen. *Chemo NO Trial Group, Germany* N Harbeck, F Janicke, C Meisner, M Schmitt, C Thomssen. *Chicago University, IL, USA* P Meier. *Chinese Academy of Medical Sciences, Beijing, People's Republic of China (in collaboration with the Oxford CTSU)* Y Shan, Y F Shao, X Wang, D B Zhao (CTSU: Z M Chen, H C Pan). *Christie Hospital and Holt Radium Institute, Manchester, UK* A Howell, R Swindell. *Clinical Trial Service Unit, Oxford, UK (ie, EBCTCG Secretariat)* J A Burrett, M Clarke, R Collins, C Correa, D Cutter, S Darby, C Davies, K Davies, A Delmestri, P Elphinstone, V Evans, L Gettins, J Godwin, R Gray, C Gregory, D Hermans, C Hicks, S James, A Kerr, E MacKinnon, M Lay, P McGale, T McHugh, R Peto, J Sayer, C Taylor, Y Wang. *Coimbra Instituto de Oncologia, Portugal* J Albano, C F de Oliveira, H Gervasio, J Gordilho. *Copenhagen Radium Centre, Denmark* H Johansen, H T Mouridsen. *Dana-Farber Cancer Institute, Boston, MA, USA* R S Gelman, J R Harris, D Hayes, C Henderson, C L Shapiro, E Winer. *Danish Breast Cancer Cooperative Group, Copenhagen, Denmark* P Christiansen, B Ejlersen, M Ewertz, M-B Jensen, S Moller, H T Mouridsen. *Danish Cancer Registry, Copenhagen, Denmark* B Carstensen, T Palshof. *Düsseldorf University, Germany* H J Trampisch. *Dutch Working Party for Autologous Bone Marrow Transplant in Solid Tumours, Amsterdam & Groningen, Netherlands* O Dalesio, E G E de Vries, S Rodenhuis, H van Tinteren. *Eastern Cooperative Oncology Group, Boston, MA, USA* R L Comis, N E Davidson, R Gray, N Robert, G Sledge, L J Solin, J A Sparano, D C Tormey, W Wood. *Edinburgh Breast Unit, UK* D Cameron, U Chetty, J M Dixon, P Forrest, W Jack, I Kunkler. *Elim Hospital, Hamburg, Germany* J Rossbach. *Erasmus MC/Daniel den Hoed Cancer Center, Rotterdam, Netherlands* J G M Klijn, A D Treurniet-Donker, W L J van Putten. *European Institute of Oncology, Milan, Italy* N Rotmensz, U Veronesi, G Viale. *European Organization for Research and Treatment of Cancer, Brussels, Belgium* H Bartelink, N Bijker, J Bogaerts, F Cardoso, T Cufer, J P Julien, E Rutgers, C J H van de Velde. *Evanston Hospital, IL, USA* M P Cunningham. *Finnish Breast Cancer Group, Finland* R Huovinen, H Joensuu. *Fondazione Maugeri Pavia, Italy* A Costa, C Tinterri. *Fondazione Michelangelo, Milan, Italy* G Bonadonna, L Gianni, P Valagussa. *Fox Chase Cancer Center, Philadelphia, PA, USA* L J Goldstein. *French Adjuvant Study Group (GFEA), Guyancourt, France* J Bonnetterre, P Fargeot, P Fumoleau, P Kerbrat, E Luporsi, M Namer. *German Adjuvant Breast Group (GABG), Frankfurt, Germany* W Eiermann, J Hilfrich, W Jonat, M Kaufmann, R Kreienberg, M Schumacher.

*German Breast Cancer Study Group (BMFT), Freiburg, Germany* G Bastert, H Rauschecker, R Sauer, W Sauerbrei, A Schauer, M Schumacher. *German Breast Group (GBG), Neulsenburg, Germany* J U Blohmer, S D Costa, H Eidtmann, B Gerber, C Jackisch, S Loibl, G von Minckwitz. *Ghent University Hospital, Belgium* A de Schryver, L Vakaet. *GIVIO Interdisciplinary Group for Cancer Care Evaluation, Chieti, Italy* M Belfiglio, A Nicolucci, F Pellegrini, M C Pirozzoli, M Sacco, M Valentini. *Glasgow Victoria Infirmary, UK* C S McArdle, D C Smith, S Stallard. *Groote Schuur Hospital, Cape Town, South Africa* D M Dent, C A Gudgeon, A Hacking, E Murray, E Panieri, ID Werner. *Grupo Español de Investigación en Cáncer de Mama (GEICAM), Spain* E Carrasco, M Martin, M A Segui. *Gruppo Oncologico Clinico Cooperativo del Nord Est, Aviano, Italy* E Galligioni. *Gruppo Oncologico Dell'Italia Meridionale (GOIM), Rome, Italy* M Lopez. *Guadalajara Hospital de 20 Noviembre, Mexico* A Erazo, J Y Medina. *Gunma University, Japan* J Horiguchi, H Takei. *Guy's Hospital, London, UK* I S Fentiman, J L Hayward, R D Rubens, D Skilton. *Heidelberg University I, Germany* H Scheurlen. *Heidelberg University II, Germany* M Kaufmann, H C Sohn. *Helios Klinikum Berlin-Buch, Germany* M Untch. *Hellenic Breast Surgeons Society, Greece* U Dafni, C Markopoulos. *Hellenic Cooperative Oncology Group, Athens, Greece* U Dafni, G Fountzilias. *Hellenic Oncology Research Group, Greece* D Mavroudis. *Helsinki Deaconess Medical Centre, Finland* P Klefstrom. *Helsinki University, Finland* C Blomqvist, T Saarto. *Hospital del Mar, Barcelona, Spain* M Gallen. *Innsbruck University, Austria* R Margreiter. *Institut Claudius Regaud, Toulouse, France* B de Lafontan, J Mihura, H Roche. *Institut Curie, Paris, France* B Asselain, R J Salmon, J R Vilcoq. *Institut Gustave-Roussy, Paris, France* R Arriagada, C. Bourcier, C Hill, S Koscielny, A Laplanche, M G Le, M Spielmann. *Institute of Cancer Research Clinical Trials and Statistics Unit (ICR-CTSU, NCR), UK* R A' Hern, J Bliss, P Ellis, L Kilburn, J R Yarnold. *Integraal Kankercentrum, Amsterdam, Netherlands* J Benraadt, M Kooi, A O van de Velde, J A van Dongen, J B Vermorken. *International Breast Cancer Study Group (IBCSG), Bern, Switzerland* M Castiglione, A Coates, M Colleoni, J Collins, J Forbes, R D Gelber, A Goldhirsch, J Lindtner, K N Price, M M Regan, C M Rudenstam, H J Senn, B Thuerlimann. *International Collaborative Cancer Group, Charing Cross Hospital, London, UK* J M Bliss, C E D Chivers, R C Coombes, E Hall, M Marty. *International Drug Development Institute, Louvain-la-Neuve, Belgium* M Buyse. *International TABLE Study Group, Berlin, Germany* K Possinger, P Schmid, M Untch, D Wallwiener. *ISD Cancer Clinical Trials Team (incorporating the former Scottish Cancer Therapy Network), Edinburgh, UK* L Foster, W D George, H J Stewart, P Stroner. *Israel NSABC, Tel Aviv, Israel* R Borovik, H Hayat, M J Inbar, E Robinson. *Istituto Nazionale per la Ricerca sul Cancro, Genova, Italy* P Bruzzi, L Del Mastro, P Pronzato, M R Sertoli, M Venturini. *Istituto Nazionale per lo Studio e la Cura dei Tumori, Milan, Italy* T Camerini, G De Palo, M G Di Mauro, F Formelli, P Valagussa. *Istituto Oncologico Romagnolo, Forli, Italy* D Amadori. *Italian Cooperative Chemo-Radio-Surgical Group, Bologna, Italy* A Martoni, F Annuti. *Italian Oncology Group for Clinical Research (GOIRC), Parma, Italy* R Camisa, G Cocconi, A Colozza, R Passalacqua. *Japan Clinical Oncology Group- Breast Cancer Study Group, Matsuyama, Japan* K Aogi, S Takashima. *Japanese Foundation for Multidisciplinary Treatment of Cancer, Tokyo, Japan* O Abe, T Ikeda, K Inokuchi, K Kikuchi, K Sawa. *Kawasaki Medical School, Japan* H Sonoo. *Krakow Oncology, Poland* S Korzeniowski, J Skolyszewski. *Kumamoto University Group, Japan* M Ogawa, J Yamashita. *Leiden University Medical Center, Netherlands* E Bastiaansen, C J H van de Velde, W van de Water, J G H van Nes. *Leuven Akademisch Ziekenhuis, Gasthuisberg, Belgium* R Christiaens, P Neven, R Paridaens, W Van den Bogaert. *Ludwig-Maximilians University, Munich, Germany* S Braun, W Janni. *Marseille Laboratoire de Cancérologie Biologique APM, France* P Martin, S Romain. *Medical University Vienna - General Hospital - Department of Obstetrics and Gynaecology and Department of Medicine I, Vienna, Austria* M Janauer, M Seifert, P Sevelda, C C Zielinski. *Memorial Sloan-Kettering Cancer Center, New York, NY, USA* T Hakes, C A Hudis, L Norton, R Wittes. *Metaxas Memorial Cancer Hospital, Athens, Greece* G Giokas, D Kondylis, B Lissaios. *Mexican National Medical Center, Mexico City, Mexico* R de la Huerta, M G Sainz. *National Cancer Institute, Bethesda, MD, USA* R Altemus, K Camphausen, K Cowan, D Danforth, A Lichter, M Lippman, J O' Shaughnessy, L J Pierce, S Steinberg, D Venzon, J A Zujewski. *National Cancer Institute of Bari, Italy* C-D' Amico, M Lioce, A Paradiso. *NCIC Clinical Trials Group, Kingston, Ontario, Canada* J A-W Chapman, K Gelmon, P E Goss, M N Levine, R Meyer, W Parulekar, J L Pater, K I Pritchard, L E Shepherd, D Tu, T Whelan. *National Kyushu Cancer Center, Japan* Y Nomura, S Ohno. *National Surgical Adjuvant Breast and Bowel Project (NSABP), Pittsburgh, PA, USA*

S Anderson, G Bass, A Brown (deceased), J Bryant (deceased), J Costantino, J Dignam, B Fisher, C Geyer, E P Mamounas, S Paik, C Redmond, S Swain, L Wickerham, N Wolmark. *Nalvader Adjuvant Trial Organisation, London, UK* M Baum, I M Jackson (deceased), M K Palmer. *North Central Cancer Treatment Group, Mayo Clinic, Rochester, MN, USA* E Perez, J N Ingle, V J Suman. *North Sweden Breast Cancer Group, Umeå, Sweden* N O Bengtsson, S Emdin, H Jonsson. *North-West Oncology Group (GONO), Italy* L Del Mastro, M Venturini. *North-Western British Surgeons, Manchester, UK* J P Lythgoe, R Swindell. *Northwick Park Hospital, London, UK* M Kissin. *Norwegian Breast Cancer Group, Oslo, Norway* B Erikstein, E Hannisdal, A B Jacobsen, J E Varhaug. *Norwegian Radium Hospital, Oslo, Norway* B Erikstein, S Gundersen, M Hauer-Jensen, H Host, A B Jacobsen, R Nissen-Meyer. *Nottingham City Hospital, UK* R W Blamey, A K Mitchell, D A L Morgan, J F R Robertson. *Oita Prefectural Hospital, Japan* H Ueo. *Oncofrance, Paris, France* M Di Palma, G Mathe (deceased), J L Misset. *Ontario Clinical Oncology Group, Hamilton, Canada* M Levine, K I Pritchard, T Whelan. *Osaka City University, Japan* K Morimoto. *Osaka National Hospital, Japan* K Sawa, Y Takatsuka. *Oxford Radcliffe Hospitals NHS Trust, Churchill Hospital, Oxford, UK* E Crossley, A Harris, D Talbot, M Taylor. *PACS Adjuvant Study Group, France* A L Martin, H Roche. *Parma Hospital, Italy* G Cocconi, B di Blasio. *Petrov Research Institute of Oncology, St Petersburg, Russia* V Ivanov, R Paltuev, V Semiglazov. *Piedmont Oncology Association, Winston-Salem, NC, USA* J Brockschmidt, M R Cooper. *Pretoria University, South Africa* C I Falkson. *Royal Marsden NHS Trust, London and Sutton, UK* R A' Hern, S Ashley, M Dowsett, A Makris, T J Powles, I E Smith, J R Yarnold. *St George's Hospital, London, UK* J C Gazet. *St George Hospital, Sydney, Australia* L Browne, P Graham. *St Luke's Hospital, Dublin, Ireland* N Corcoran. *Sardinia Oncology Hospital A Businico, Cagliari, Sardinia* N Deshpande, L di Martino. *SASIB International Trialists, Cape Town, South Africa* P Douglas, A Hacking, H Host, A Lindtner, G Notter. *Saskatchewan Cancer Foundation, Regina, Canada* A J S Bryant, G H Ewing, L A Firth, J L Krushen-Kosloski. *Scandinavian Adjuvant Chemotherapy Study Group, Oslo, Norway* R Nissen-Meyer. *South Sweden Breast Cancer Group, Lund, H Anderson, F Killander, P Malmstrom, L Ryden. South-East Sweden Breast Cancer Group, Linköping, Sweden* L-G Arnesson, J Carstensen, M Dumfats, H Fohlin, B Nordenskjöld, M Soderberg. *South-Eastern Cancer Study Group and Alabama Breast Cancer Project, Birmingham, AL, USA* J T Carpenter. *Southampton Oncology Centre, UK* N Murray, G T Royle, P D Simmonds. *Southwest Oncology Group, San Antonio, TX, USA* K Albain, W Barlow, J Crowley, D Hayes, J Gralow, S Green, G Hortobagyi, R Livingston, S Martino, C K Osborne, P M Ravdin. *Stockholm Breast Cancer Study Group, Sweden* J Adolfsson, J Bergh, T Bondesson, F Celebioglu, K Dahlberg, T Fornander, I Fredriksson, J Frisell, E Goransson, M Iliristo, U Johansson, E Lenner, L Lofgren, P Nikolaidis, L Perbeck, S Rotstein, K Sandelin, L Skoog, G Svane, E af Trampe, C Wadstrom. *Swiss Group for Clinical Cancer Research (SAKK), Bern, and OSAKO, St Gallen, Switzerland* M Castiglione, A Goldhirsch, R Maibach, H J Senn, B Thurlimann. *Tampere University Hospital, Finland* M Hakama, K Holli, J Isola, K Rouhento, R Saaristo. *Tel Aviv University, Israel* H Brenner, A Hercbergs. *The High-Dose Chemotherapy for Breast Cancer Study Group (PEGASE), France* A L Martin, H Roche. *Tokyo Cancer Institute Hospital, Japan* M Yoshimoto. *Toronto-Edmonton Breast Cancer Study Group, Canada* A H G Paterson, K I Pritchard. *Toronto Princess Margaret Hospital, Canada* A Fyles, J W Meakin, T Panzarella, K I Pritchard. *Tunis Institut Salah Azaiz, Tunisia* J Bahi. *UK Multicentre Cancer Chemotherapy Study Group, London, UK* M Reid, M Spittle. *UK/ANZ DCIS Trial* H Bishop, N J Bundred, J Czucik, I O Ellis, I S Fentiman, J F Forbes, S Forsyth, W D George, S E Pinder, I Sestak. *UK/Asia Collaborative Breast Cancer Group, London, UK* G P Deutsch, R Gray, D L W Kwong, V R Pai, R Peto, F Senanayake. *University and Istituto Nazionale per la Ricerca sul Cancro, Genoa, Italy on behalf of GROCTA trialists* F Boccardo, A Rubagotti. *University College London, UK* M Baum, S Forsyth, A Hackshaw, J Houghton, J Ledermann, K Monson, JS Tobias. *University Federico II, Naples, Italy* C Carlomagno, M De Laurentiis, S De Placido. *University of Edinburgh, UK* L Williams. *University of Michigan, USA* D Hayes, L J Pierce. *University of Texas MD Anderson Cancer Center, Houston, TX, USA* K Broglio, A U Buzdar. *University of Wisconsin, USA* R R Love. *Uppsala-Örebro Breast Cancer Study Group, Sweden* J Ahlgren, H Garmo, L Holmberg, G Liljegen, H Lindman, F Warnberg. *US Oncology, Houston, USA* L Asmar, S E Jones. *West German Study Group (WSG), Germany* O Gluz, N Harbeck, C Liedtke, U Nitz. *West of Scotland Breast Trial Group, Glasgow, UK* A Litton. *West Sweden Breast Cancer Study Group, Gothenburg, Sweden* A Wallgren, P Karlsson, B K Linderholm. *Western Cancer Study Group, Torrance, CA, USA* R T Chlebowski. *Würzburg University, Germany* H Caffier.

# EBCTCG, Lancet 2011

**Comparisons between different polychemo-  
therapy regimens for early breast cancer:  
meta-analyses of long-term outcome among  
100,000 women in 123 randomised trials**

**Early Breast Cancer Trialists' Collaborative Group  
(EBCTCG)**

**Published online December 6, 2011 in The Lancet**

**DOI:10.1016/S0140-6736(11)61625-5**

# Direct and indirect comparisons between different polychemotherapy regimens, based on ~100,000 randomised women

**45,000 taxane vs no taxane\***

(44,000 with anthracycline in both arms)

**22,000 anthracycline vs CMF**

(18,000 vs “standard” CMF)

**5,000 more vs less anthracycline**

(2000 comparing currently relevant doses)

**31,000 polychemotherapy vs no adjuvant chemo**

(13,000 CMF vs Nil; 10,000 anthr.-based regimen vs Nil)

\* Excludes trials of one taxane regimen vs another

# Taxane trials

**Data on 44,000 women in randomised trials of a taxane-plus-anthracycline-based regimen vs the SAME, or MORE, non-taxane chemotherapy**

**11,000** in trials where the non-taxane regimen was the SAME, and **33,000** in trials where it was MORE

[15% node-negative; mean follow-up only 5 years;  
mean recurrence rate about 5% per year]

## Taxane-plus-anthracycline-based regimens vs (L) the SAME, or (R) MORE, non-taxane chemo.

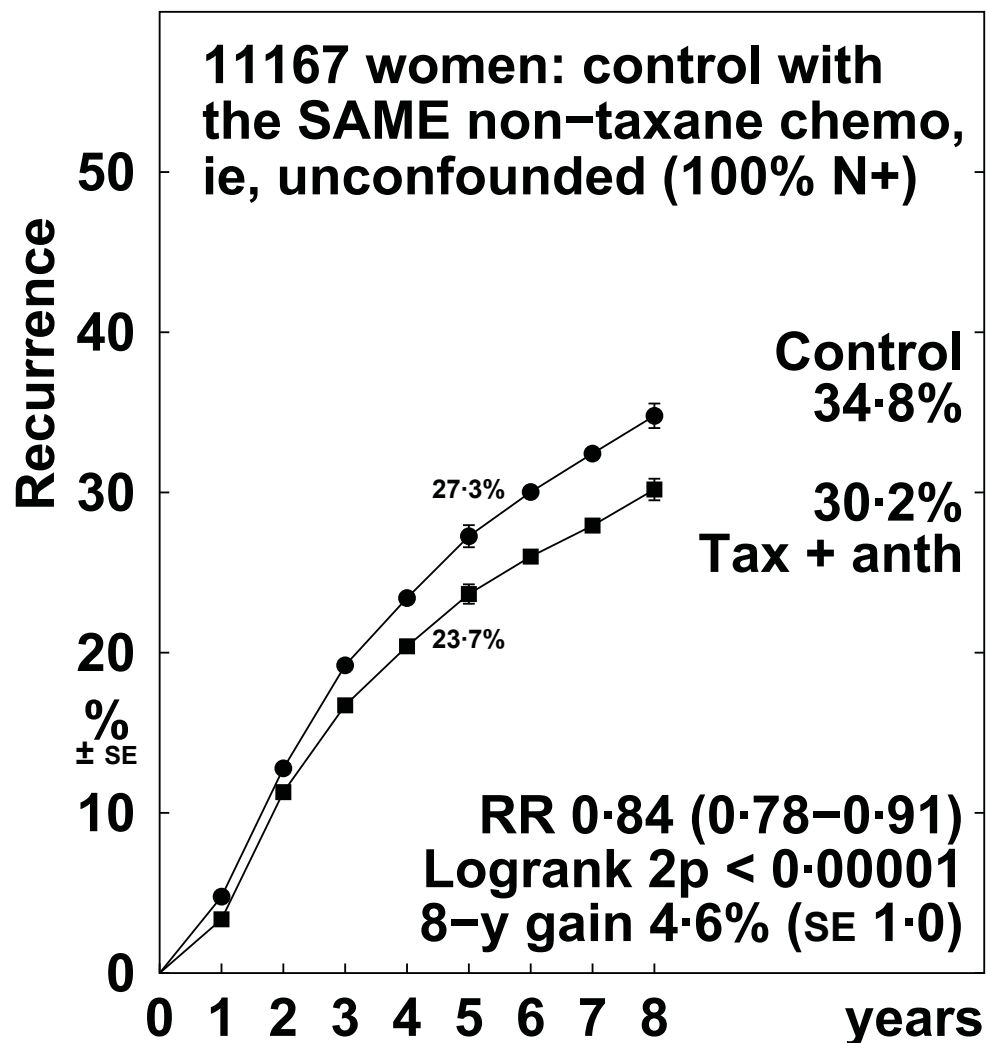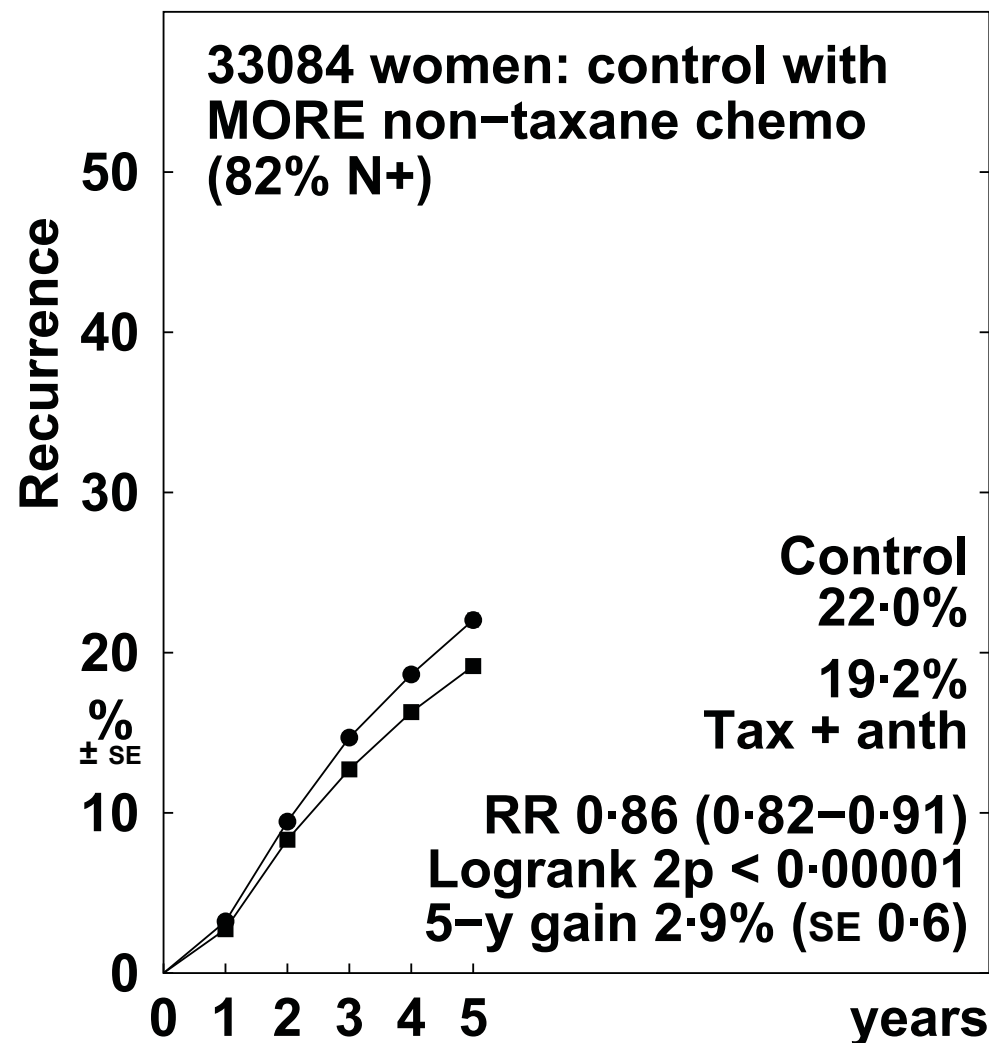

Recurrence rates (% / year) and logrank analyses

| Allocation | Years 0 - 4         | Year 5+            |
|------------|---------------------|--------------------|
| Tax + anth | 5.51 (1280 / 23249) | 3.10 (413 / 13343) |
| Control    | 6.43 (1239 / 19259) | 3.62 (381 / 10534) |
| Rate ratio | 0.84 SE 0.04        | 0.85 SE 0.07       |
| (O-E) / V  | -95.5 / 557.3       | -30.5 / 182.8      |

| Years 0 - 4         | Year 5+           |
|---------------------|-------------------|
| 4.37 (2607 / 59665) | 3.01 (153 / 5082) |
| 5.02 (2586 / 51508) | 2.69 (127 / 4727) |
| 0.85 SE 0.03        | 1.03 SE 0.13      |
| -181.4 / 1153.8     | 1.9 / 63.6        |

# Taxane-plus-anthracycline-based regimens vs (L) the SAME, or (R) MORE, non-taxane chemo.

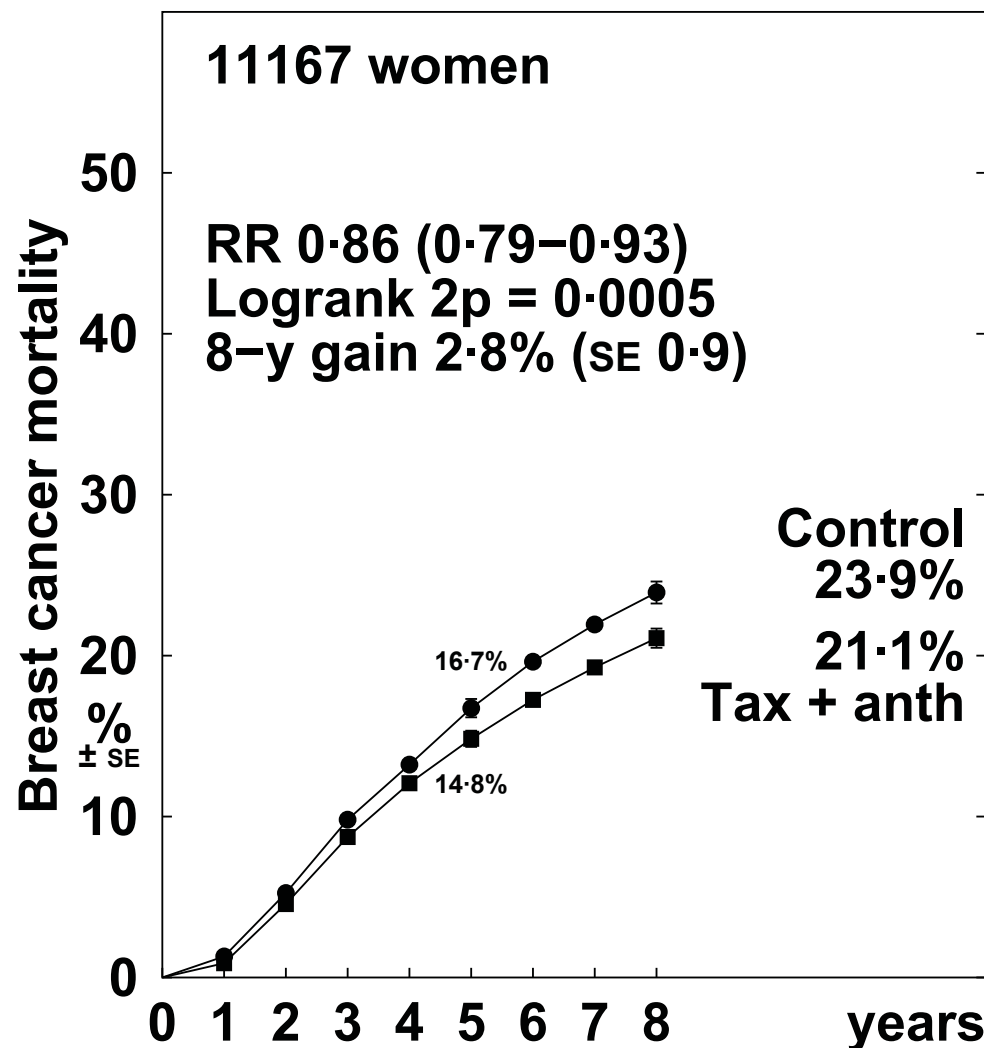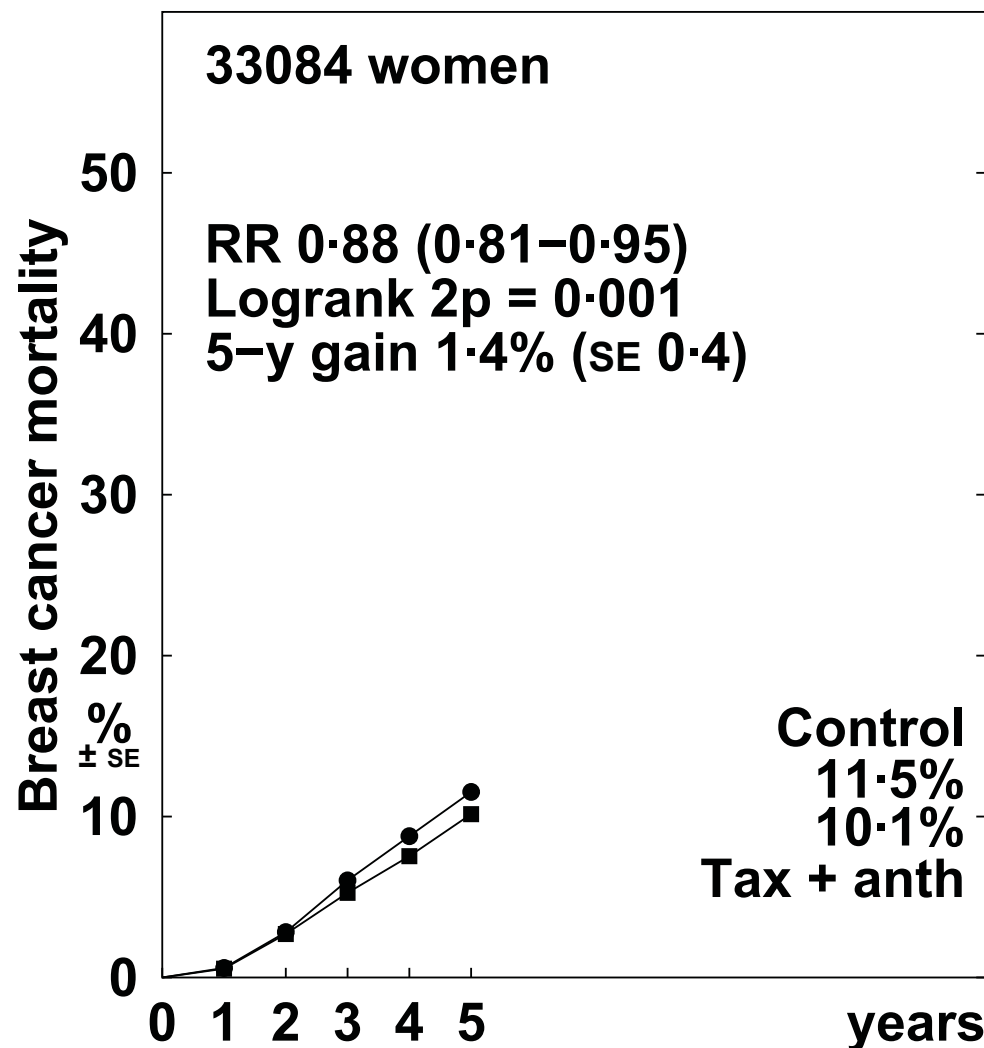

| Death rates (% / year: total rate – rate in women without recurrence) | Years 0 – 4   | Year 5+       |
|-----------------------------------------------------------------------|---------------|---------------|
| Allocation                                                            | Years 0 – 4   | Year 5+       |
| Tax + anth                                                            | 3.21 SE 0.11  | 2.48 SE 0.13  |
| Control                                                               | 3.58 SE 0.13  | 3.06 SE 0.16  |
| Rate ratio                                                            | 0.88 SE 0.05  | 0.82 SE 0.07  |
| (O-E) / V                                                             | -46.4 / 348.5 | -33.3 / 172.3 |

| Death rates (% / year: total rate – rate in women without recurrence) | Years 0 – 4   | Year 5+      |
|-----------------------------------------------------------------------|---------------|--------------|
| Allocation                                                            | Years 0 – 4   | Year 5+      |
| Tax + anth                                                            | 2.01 SE 0.06  | 2.37 SE 0.20 |
| Control                                                               | 2.30 SE 0.07  | 2.26 SE 0.21 |
| Rate ratio                                                            | 0.87 SE 0.04  | 0.97 SE 0.13 |
| (O-E) / V                                                             | -77.0 / 549.5 | -1.7 / 57.4  |

# Taxane-plus-anthracycline-based regimens vs (L) the SAME, or (R) MORE, non-taxane chemo.

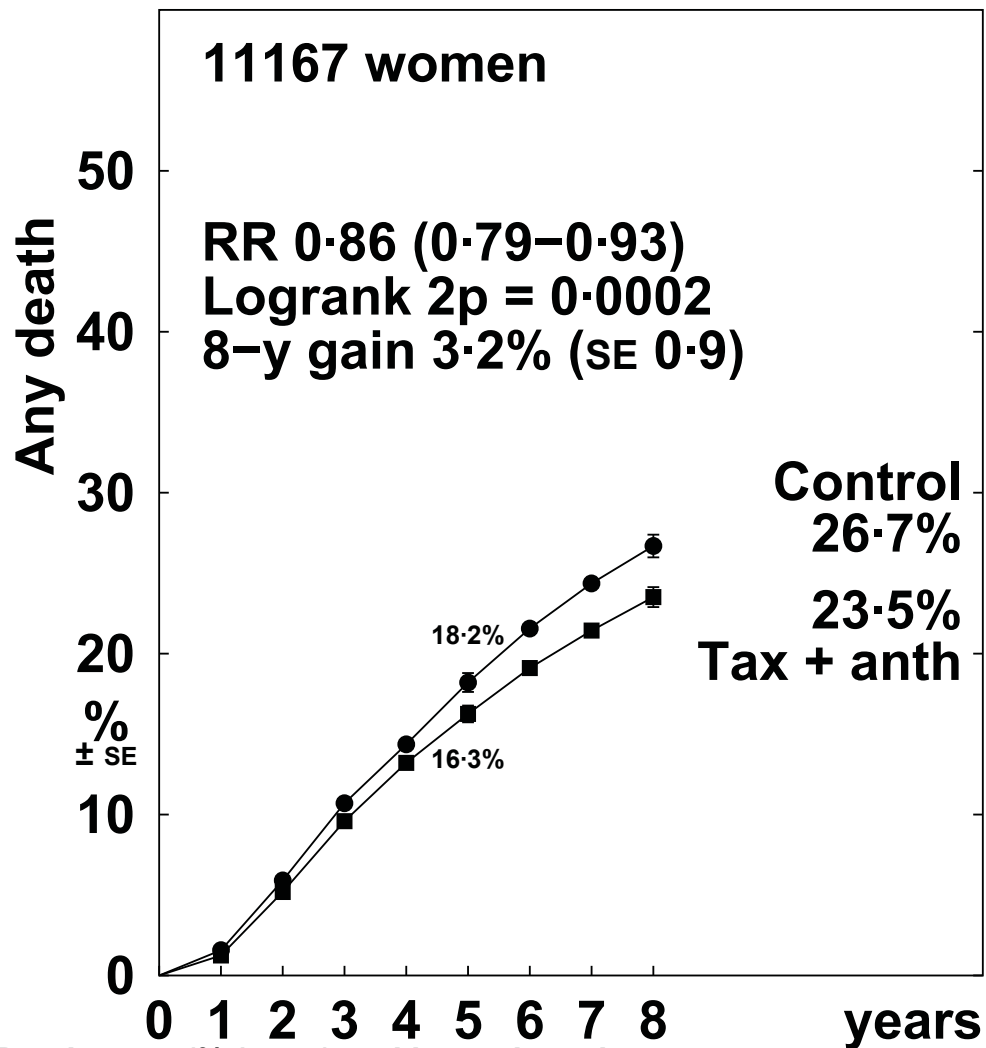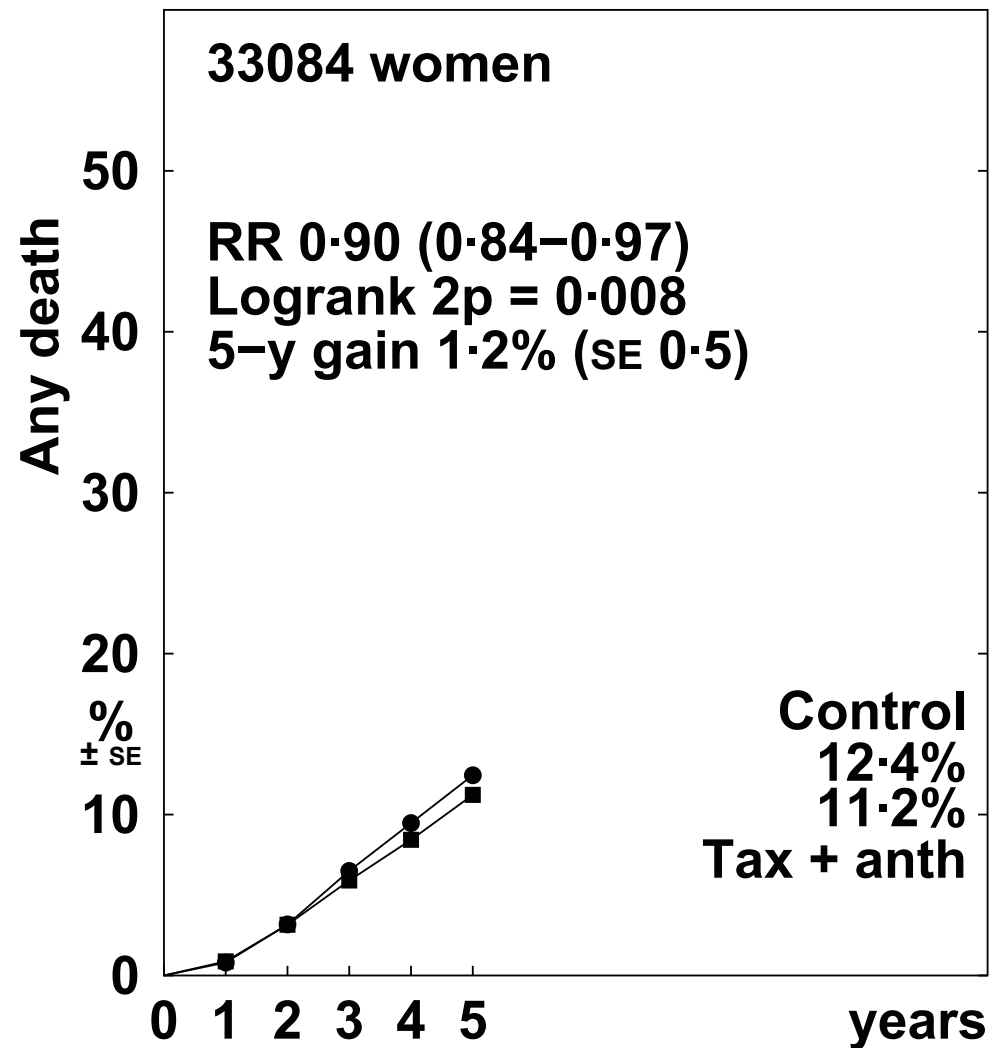

Death rates (% / year) and logrank analyses

| Allocation | Years 0 – 4        | Year 5+            |
|------------|--------------------|--------------------|
| Tax + anth | 3.55 (881 / 24821) | 3.09 (465 / 15061) |
| Control    | 3.93 (819 / 20850) | 3.76 (458 / 12178) |
| Rate ratio | 0.88 SE 0.05       | 0.82 SE 0.06       |
| (O-E) / V  | -48.6 / 386.0      | -41.3 / 213.4      |

| Allocation | Years 0 – 4         | Year 5+           |
|------------|---------------------|-------------------|
| Tax + anth | 2.24 (1326 / 59104) | 2.85 (161 / 5658) |
| Control    | 2.51 (1326 / 52888) | 2.84 (152 / 5358) |
| Rate ratio | 0.90 SE 0.04        | 0.96 SE 0.12      |
| (O-E) / V  | -66.3 / 608.4       | -3.1 / 70.9       |



## **Taxane comparisons, subdivided according to:**

- (a) how the non-taxane treatments compare (active = control, active =  $\frac{1}{2}$  control, or an intermediate ratio), and**
- (b) whether the cycles of taxane are given concurrently (©) with the anthracycline, or whether taxanes are given alone (†).**

# Breast cancer mortality ratio in taxane trials, by TYPE of treatment comparison

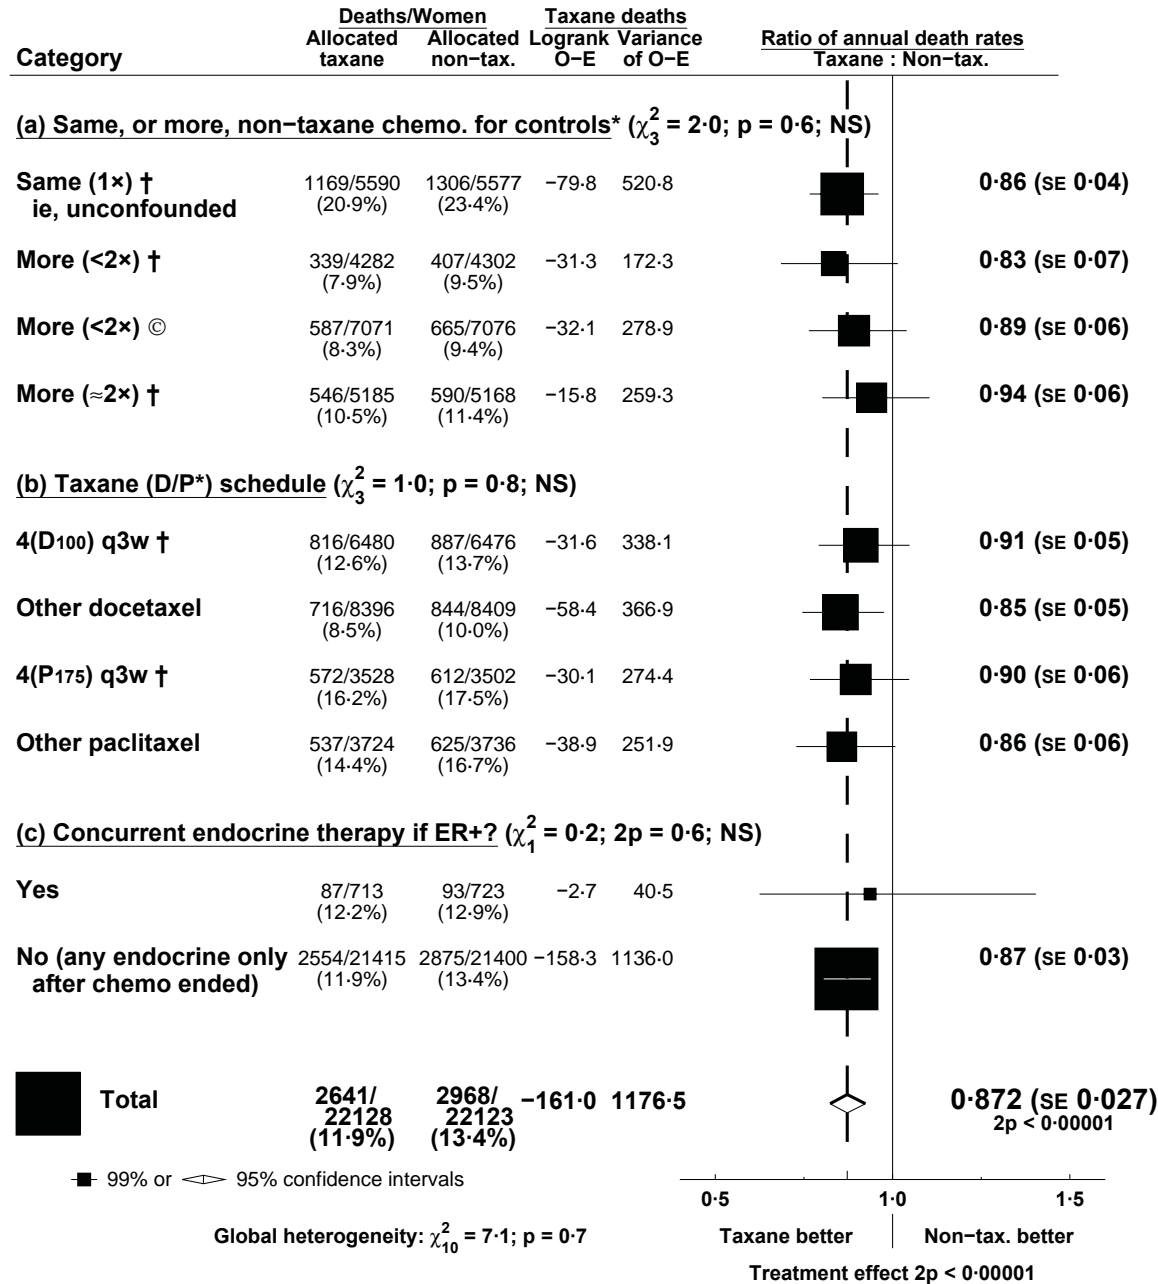

**Taxane trials: subgroup analyses  
by age, stage and ER status**

**Taxane-plus-anthracycline-based regimen  
vs  
an anthracycline-based control regimen  
with the SAME, or MORE, of each  
non-taxane cytotoxic drug**

# Taxane-plus-anthracycline-based regimen vs the SAME, or MORE, non-taxane chemo, by ENTRY AGE

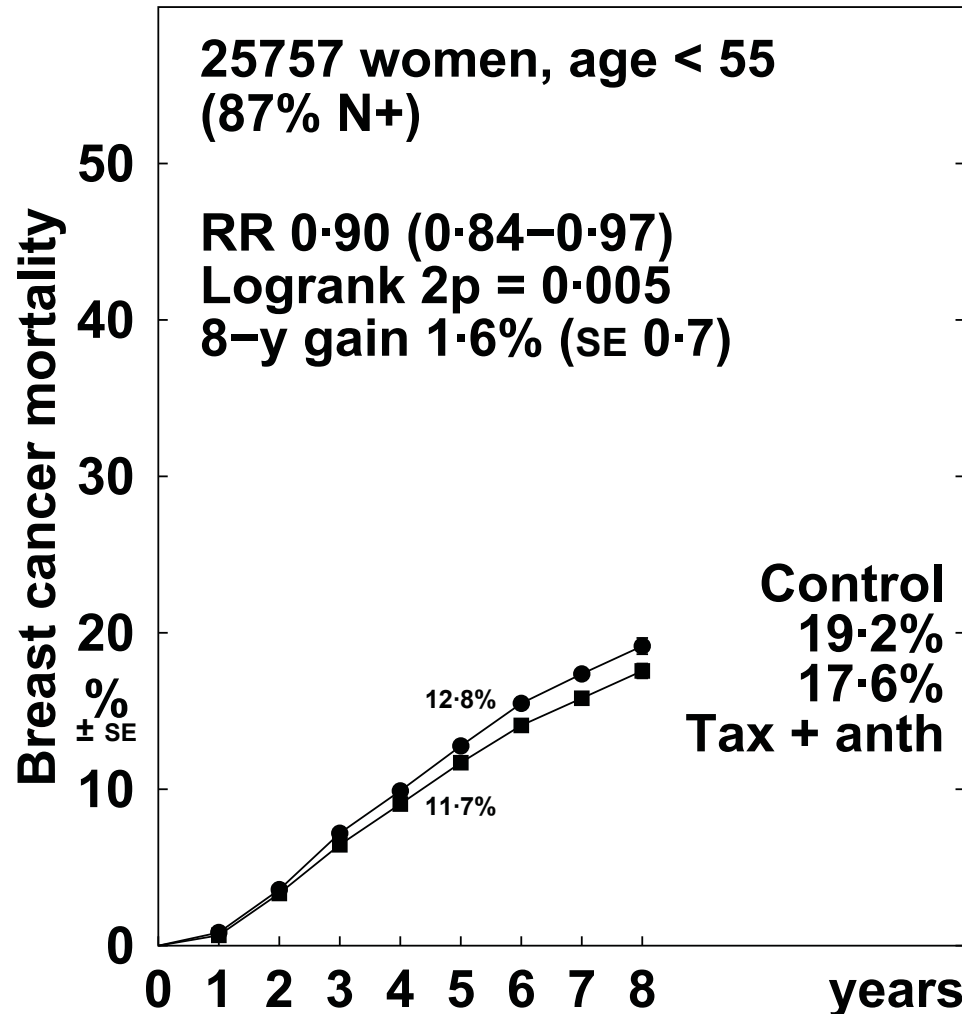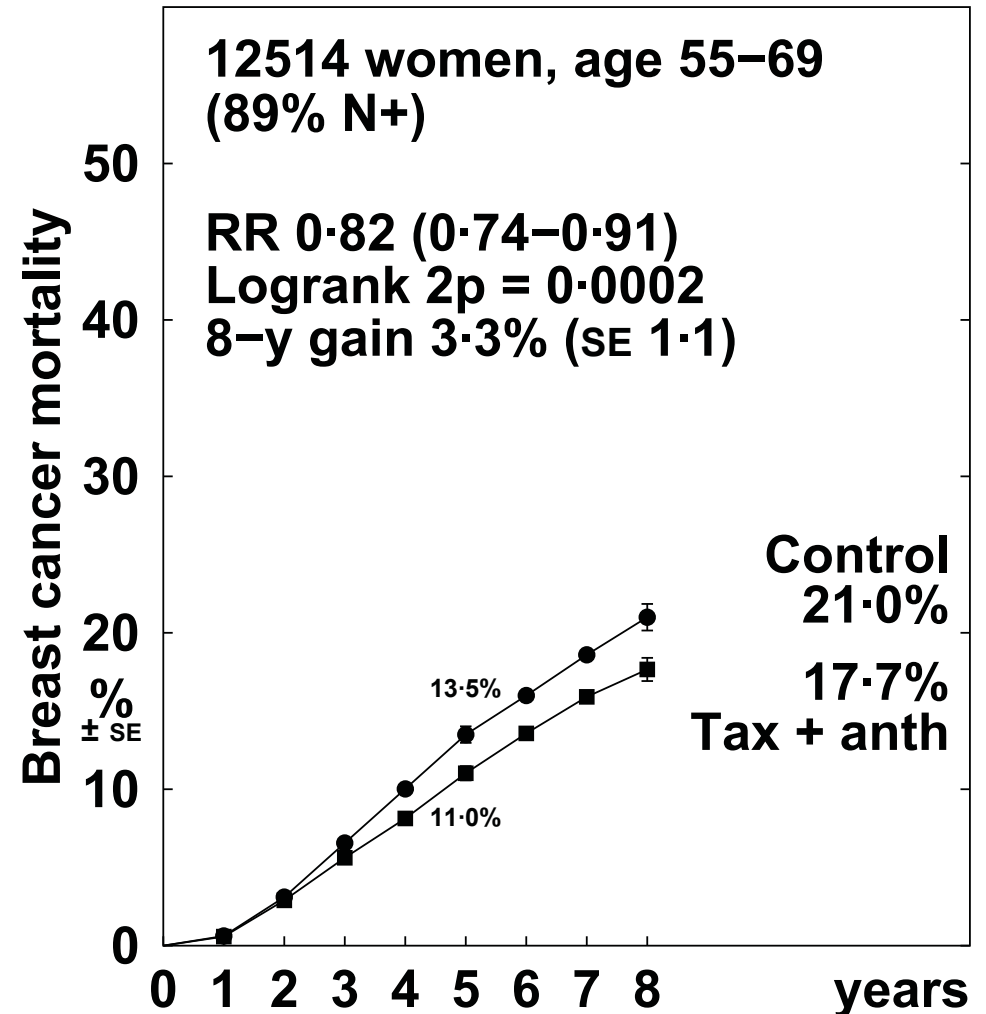

Death rates (% / year: total rate – rate in women without recurrence)

| Allocation | Years 0 – 4   | Year 5+       |
|------------|---------------|---------------|
| Tax + anth | 2.42 SE 0.07  | 2.36 SE 0.13  |
| Control    | 2.62 SE 0.07  | 2.63 SE 0.15  |
| Rate ratio | 0.91 SE 0.04  | 0.88 SE 0.08  |
| (O–E) / V  | –58.4 / 604.0 | –19.6 / 152.8 |

| Allocation | Years 0 – 4   | Year 5+      |
|------------|---------------|--------------|
| Tax + anth | 2.21 SE 0.09  | 2.64 SE 0.21 |
| Control    | 2.69 SE 0.11  | 3.14 SE 0.25 |
| Rate ratio | 0.81 SE 0.05  | 0.85 SE 0.11 |
| (O–E) / V  | –57.7 / 275.4 | –11.4 / 71.0 |

# Taxane-plus-anthracycline-based regimen vs the SAME, or MORE, non-taxane chemo, by NODAL STATUS before chemotherapy

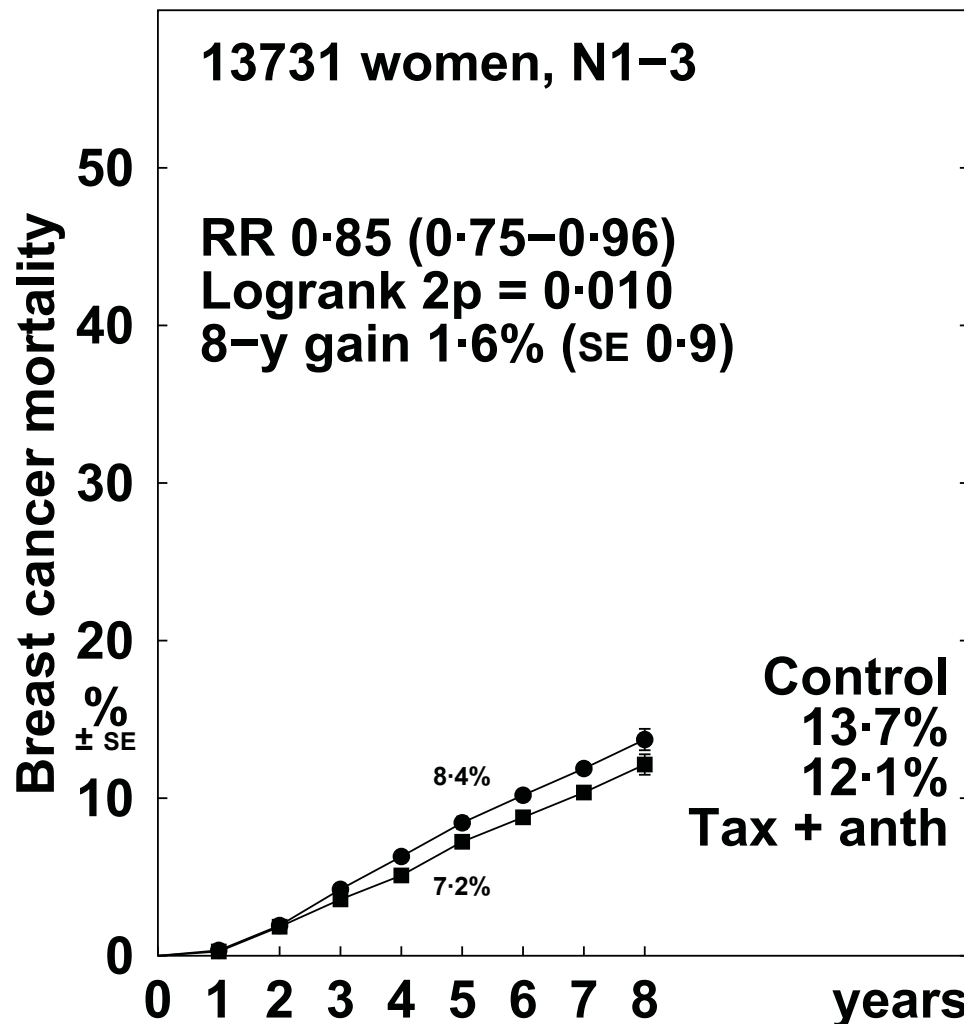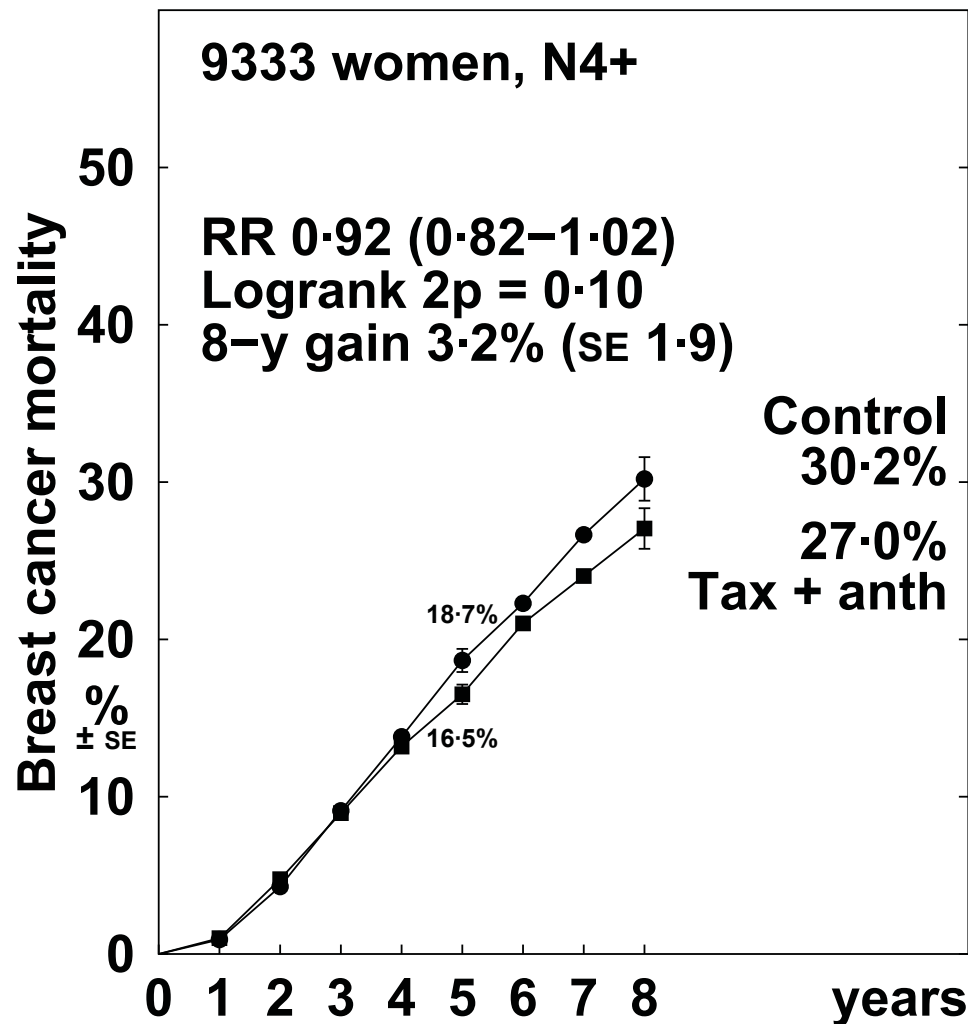

| Allocation | Death rates (% / year: total rate - rate in women without recurrence) |              |
|------------|-----------------------------------------------------------------------|--------------|
|            | Years 0 - 4                                                           | Year 5+      |
| Tax + anth | 1.39 SE 0.07                                                          | 1.76 SE 0.17 |
| Control    | 1.68 SE 0.08                                                          | 1.96 SE 0.18 |
| Rate ratio | 0.84 SE 0.06                                                          | 0.89 SE 0.13 |
| (O-E) / V  | -35.7 / 206.9                                                         | -6.3 / 55.1  |

| Allocation | Death rates (% / year: total rate - rate in women without recurrence) |              |
|------------|-----------------------------------------------------------------------|--------------|
|            | Years 0 - 4                                                           | Year 5+      |
| Tax + anth | 3.41 SE 0.13                                                          | 4.58 SE 0.41 |
| Control    | 3.82 SE 0.15                                                          | 4.72 SE 0.45 |
| Rate ratio | 0.91 SE 0.06                                                          | 0.96 SE 0.14 |
| (O-E) / V  | -27.9 / 286.1                                                         | -2.0 / 52.6  |

# Breast cancer mortality ratio in taxane trials, by AGE and STAGE

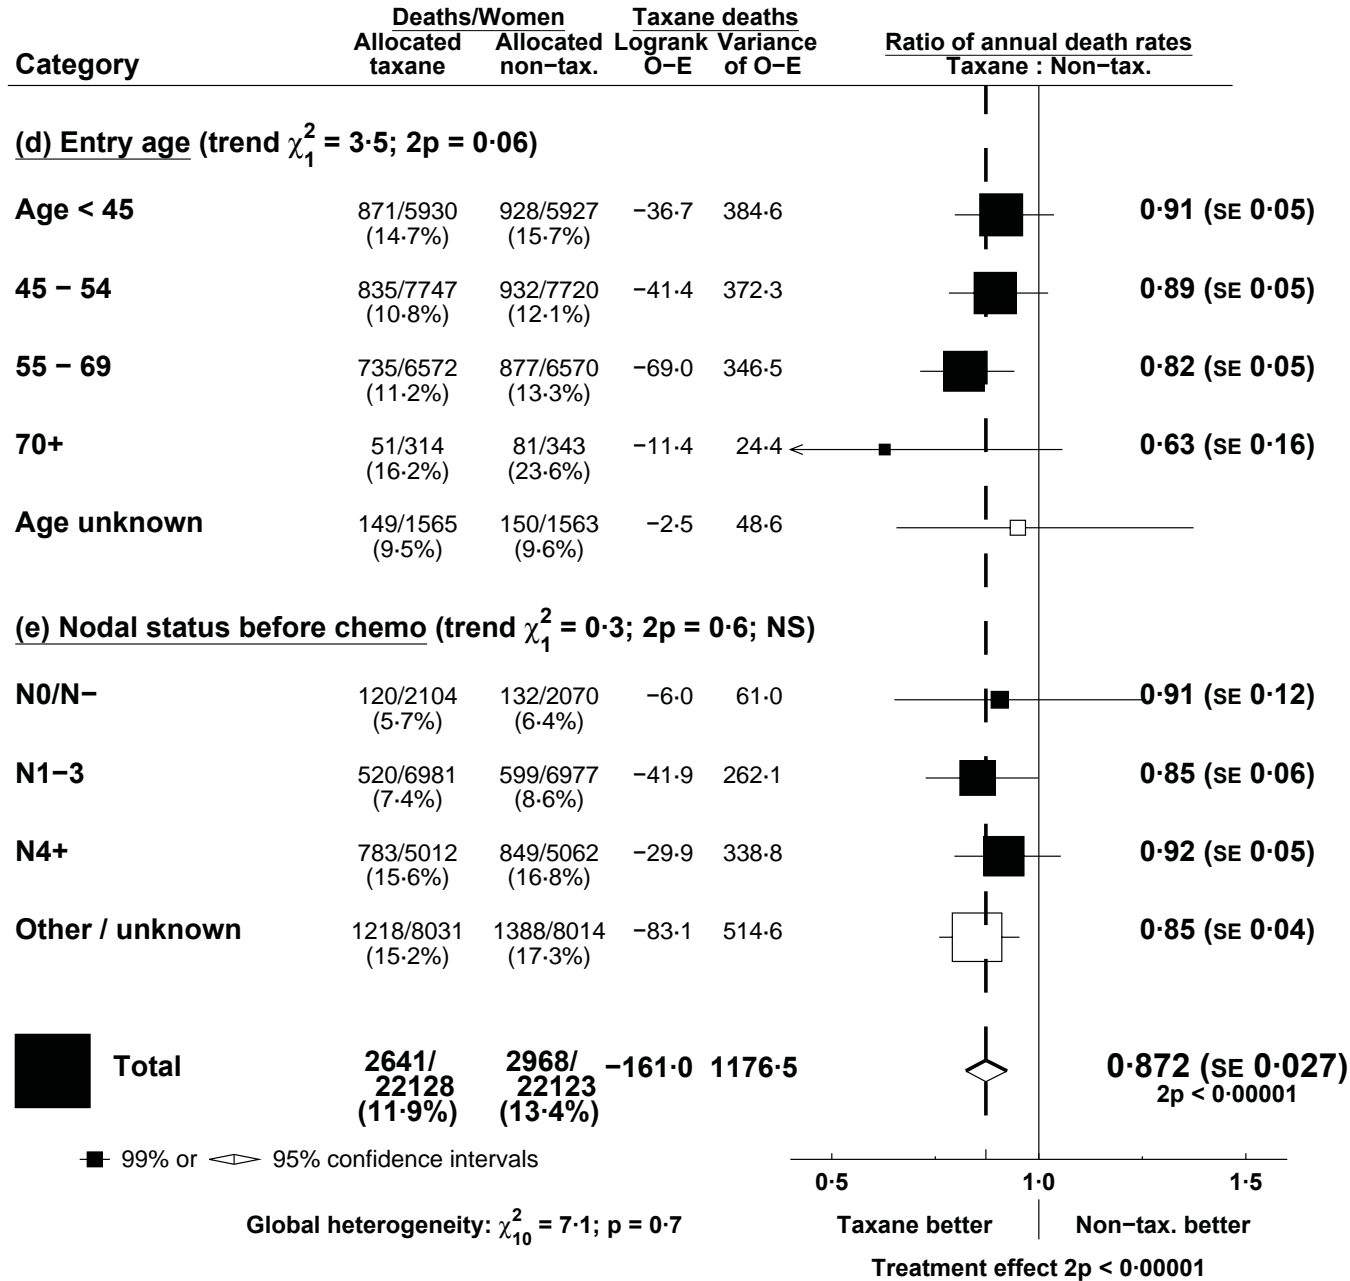

# Taxane-plus-anthracycline-based regimen vs the SAME, or MORE, non-taxane chemo, by ER STATUS

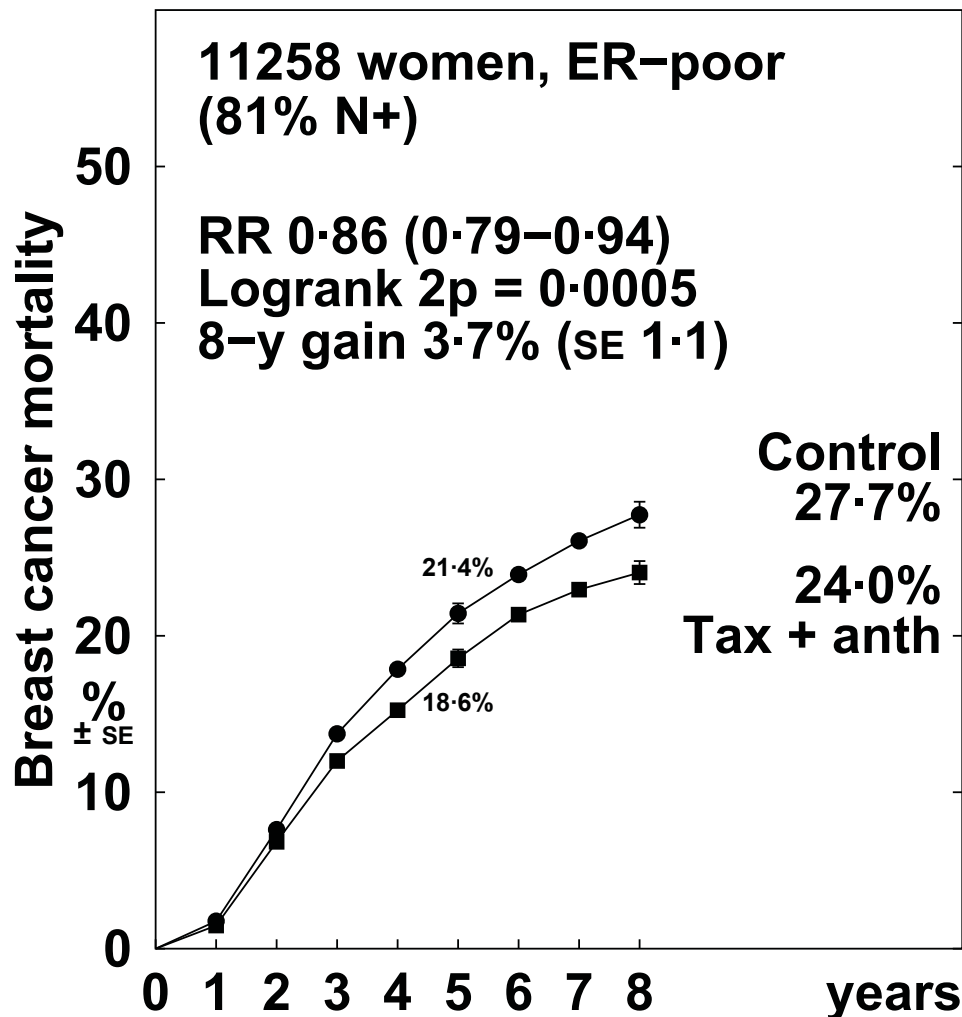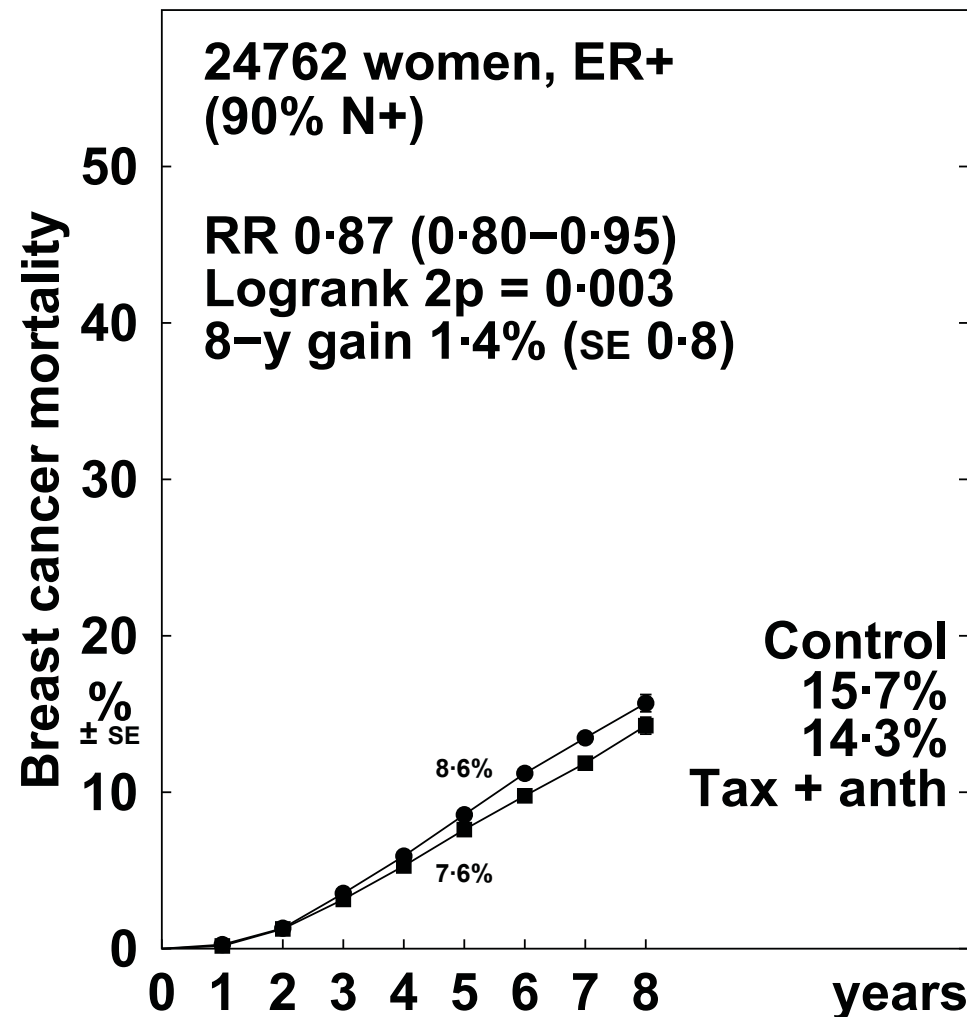

Death rates (% / year: total rate - rate in women without recurrence)

| Allocation | Years 0 - 4   | Year 5+      |
|------------|---------------|--------------|
| Tax + anth | 4.00 SE 0.13  | 2.44 SE 0.20 |
| Control    | 4.86 SE 0.15  | 2.67 SE 0.23 |
| Rate ratio | 0.85 SE 0.04  | 0.91 SE 0.12 |
| (O-E) / V  | -71.7 / 438.8 | -6.2 / 66.1  |

| Allocation | Years 0 - 4   | Year 5+       |
|------------|---------------|---------------|
| Tax + anth | 1.45 SE 0.05  | 2.51 SE 0.15  |
| Control    | 1.62 SE 0.06  | 2.87 SE 0.16  |
| Rate ratio | 0.89 SE 0.05  | 0.85 SE 0.08  |
| (O-E) / V  | -44.3 / 365.5 | -22.8 / 136.8 |

# Breast cancer mortality ratio in taxane trials, by ER STATUS and subsets of ER+

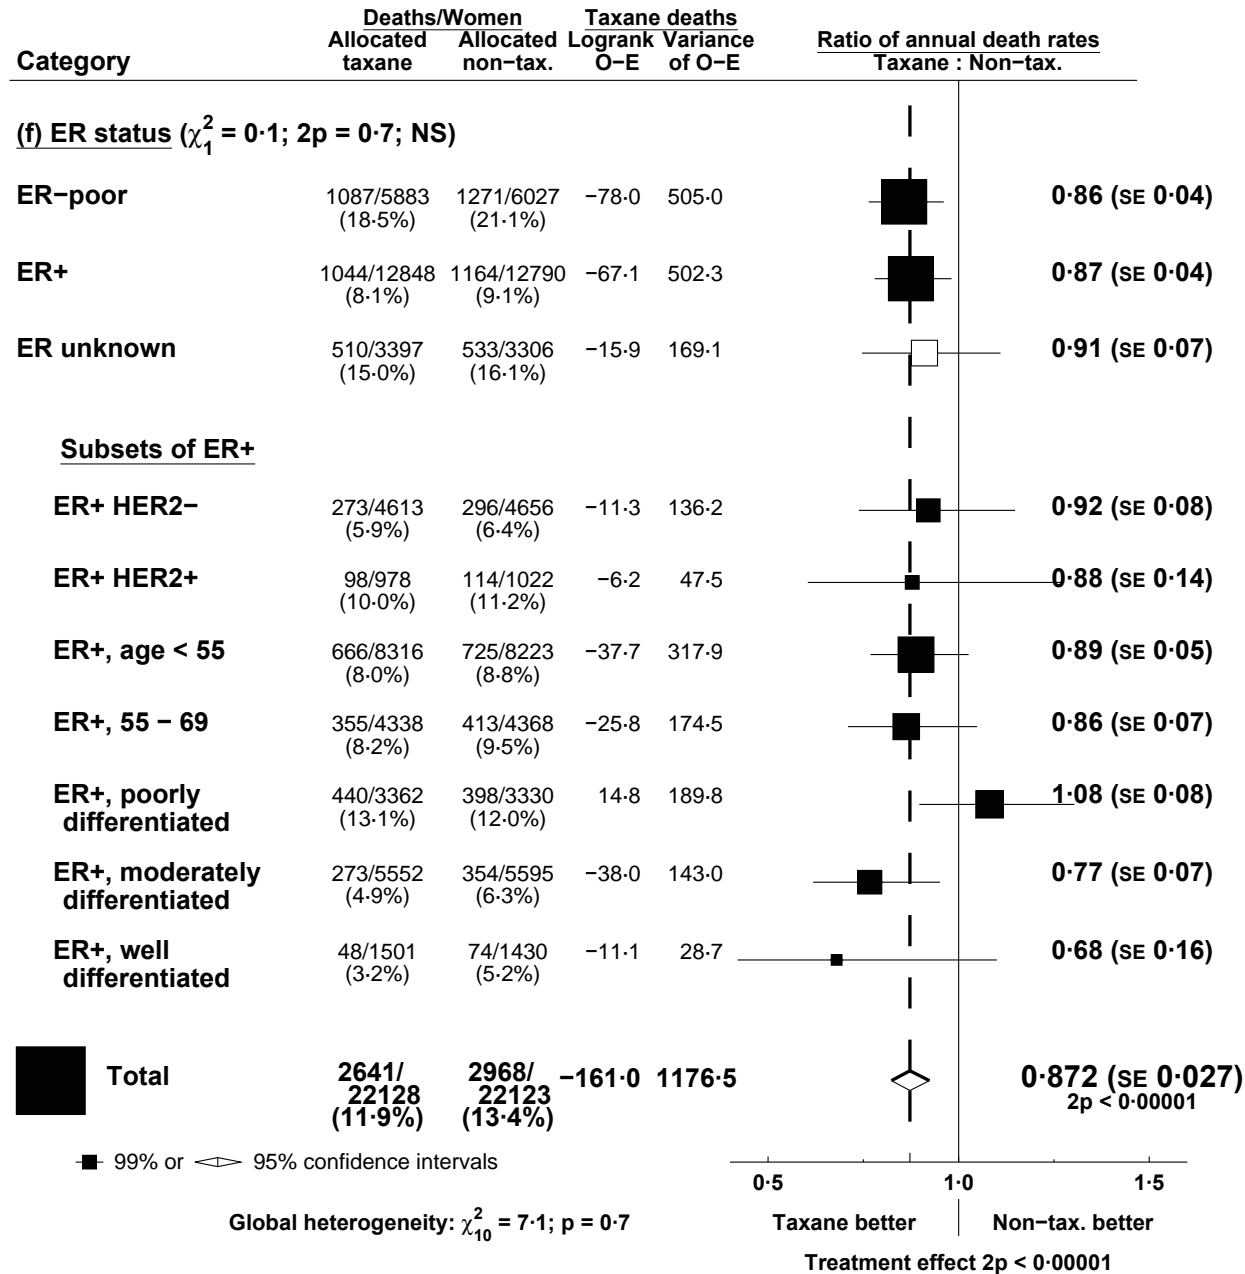



# **Trials of any anthracycline-based regimen\* vs standard CMF**

**\*Standard 4AC, standard 4EC,  
or higher-cumulative-dosage  
regimens (eg, CAF or CEF)**

# Definitions of “standard” CMF and 4AC

(mg/m<sup>2</sup> x frequency/cycle)

## Standard CMF:

Six 4-weekly cycles of **C**100x14 oral **M**40x2 iv **F**600x2 iv

## Standard 4AC:

Four 3-weekly cycles of **A**60 iv **C**600 iv

**Approximate equivalence:**  
**in the trials of standard AC vs standard CMF,**  
**both appeared to be of comparable efficacy**

# Standard 4AC vs standard CMF: approximate equivalence

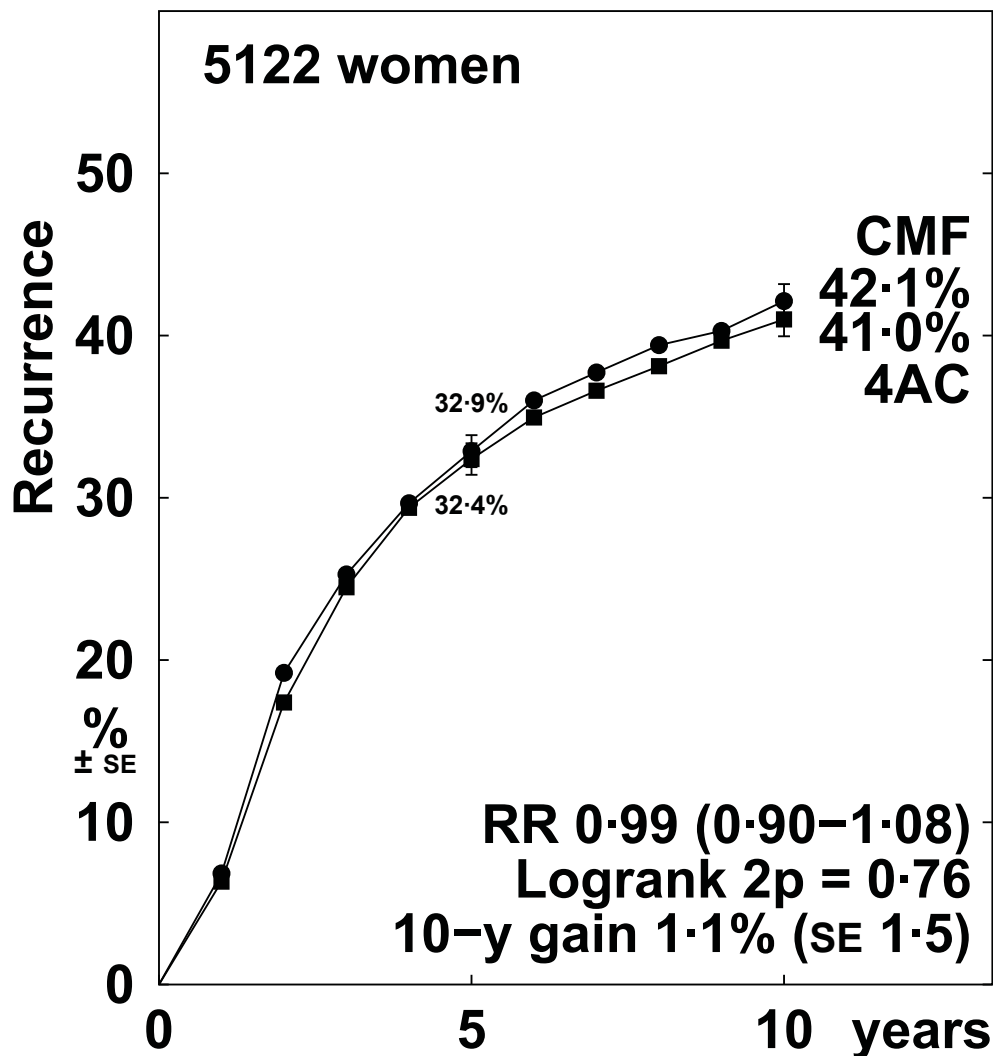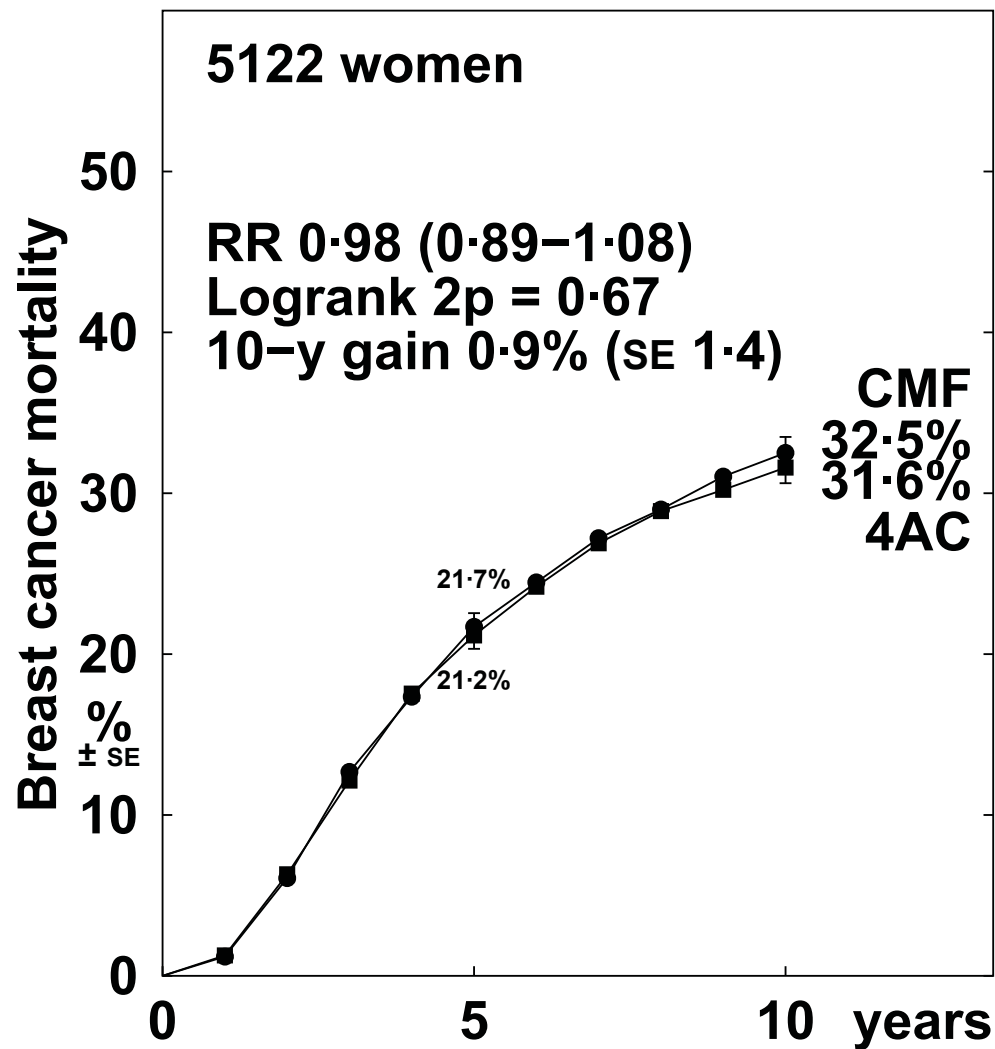

Recurrence rates (% / year) and logrank analyses

| Allocation | Years 0 – 4        | Years 5 – 9       | Year 10+          |
|------------|--------------------|-------------------|-------------------|
| 4AC        | 7.97 (820 / 10292) | 2.86 (194 / 6795) | 2.36 (100 / 4237) |
| CMF        | 8.21 (830 / 10108) | 2.99 (199 / 6658) | 1.87 (76 / 4054)  |
| Rate ratio | 0.98 SE 0.05       | 0.91 SE 0.10      | 1.28 SE 0.17      |
| (O-E) / V  | -8.7 / 355.5       | -8.5 / 92.1       | 10.4 / 42.3       |

| Years 0 – 4  | Years 5 – 9  | Year 10+     |
|--------------|--------------|--------------|
| 4.65 SE 0.20 | 2.94 SE 0.19 | 2.06 SE 0.20 |
| 4.81 SE 0.21 | 3.04 SE 0.20 | 1.96 SE 0.20 |
| 0.97 SE 0.06 | 0.97 SE 0.09 | 1.03 SE 0.15 |
| -6.3 / 245.2 | -3.7 / 111.6 | 1.5 / 48.9   |

# Examples of higher-cumulative-dosage\* anthracycline-based regimens

(mg/m<sup>2</sup> x frequency/cycle)

## **CAF:**

Six 4-weekly cycles of **C**100x14 oral **A**40x2 iv **F**500x2 iv

## **CEF:**

Six 4-weekly cycles of **C**75x14 oral **E**60x2 iv **F**500x2 iv

\* Higher dosage than standard 4AC not only of anthracycline but also of other cytotoxic drugs; scheduled dosages could be reduced for toxicity

# Anthracycline-based regimens with higher cumulative dosage (eg CAF/CEF) vs standard CMF

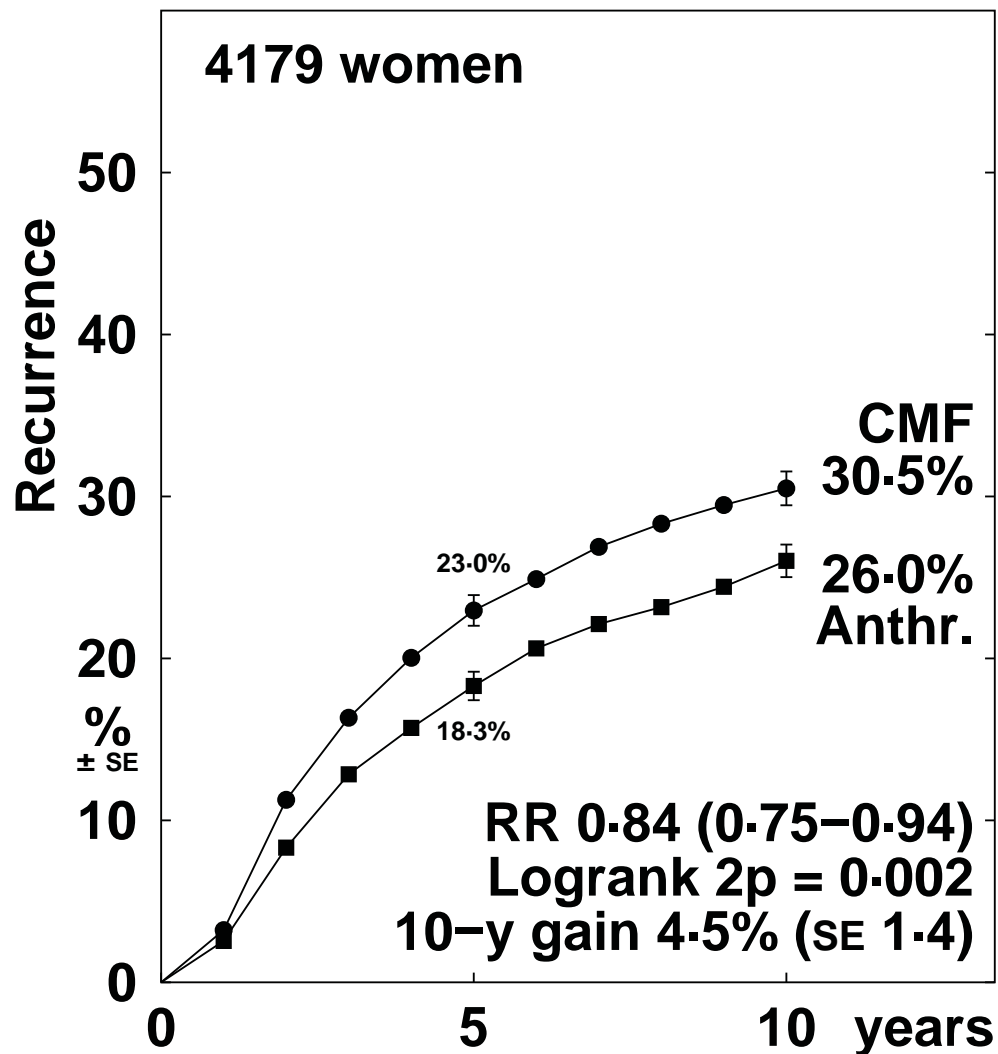

Recurrence rates (% / year) and logrank analyses

| Allocation | Years 0 – 4       | Years 5 – 9       | Year 10+         |
|------------|-------------------|-------------------|------------------|
| Anthr.     | 4.11 (381 / 9268) | 2.00 (146 / 7312) | 1.60 (58 / 3623) |
| CMF        | 5.21 (473 / 9082) | 2.10 (147 / 7012) | 1.37 (50 / 3644) |
| Rate ratio | 0.77 SE 0.06      | 0.96 SE 0.12      | 1.11 SE 0.21     |
| (O-E) / V  | -50.9 / 194.3     | -3.2 / 69.6       | 2.6 / 24.2       |

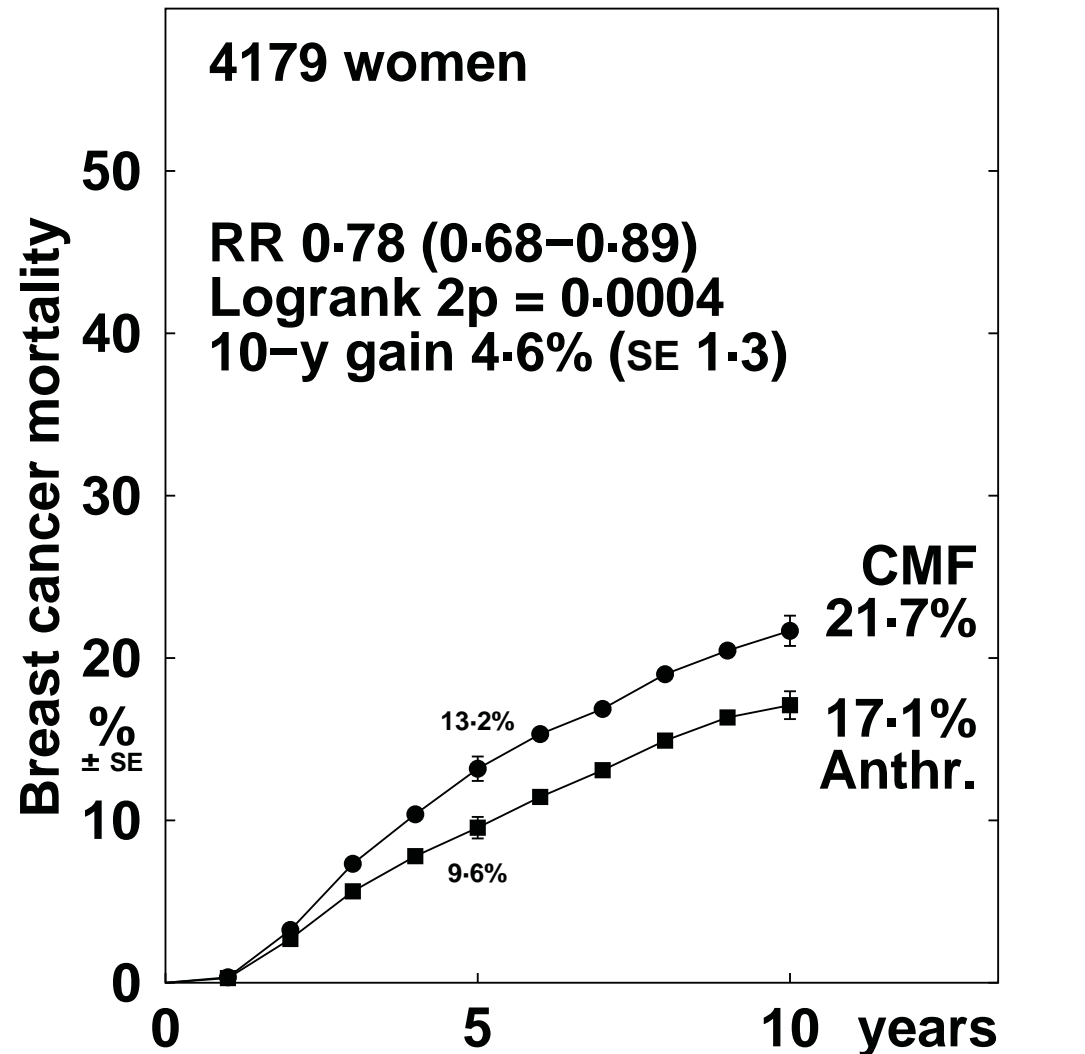

Death rates (% / year: total rate – rate in women without recurrence)

| Allocation | Years 0 – 4   | Years 5 – 9  | Year 10+     |
|------------|---------------|--------------|--------------|
| Anthr.     | 2.03 SE 0.14  | 1.75 SE 0.15 | 0.88 SE 0.15 |
| CMF        | 2.76 SE 0.17  | 2.11 SE 0.16 | 0.93 SE 0.15 |
| Rate ratio | 0.71 SE 0.08  | 0.85 SE 0.11 | 0.94 SE 0.24 |
| (O-E) / V  | -37.0 / 109.0 | -11.8 / 72.2 | -1.1 / 16.7  |

# Breast cancer mortality ratio: anthracycline-based regimen vs standard CMF, by TYPE of treatment comparison

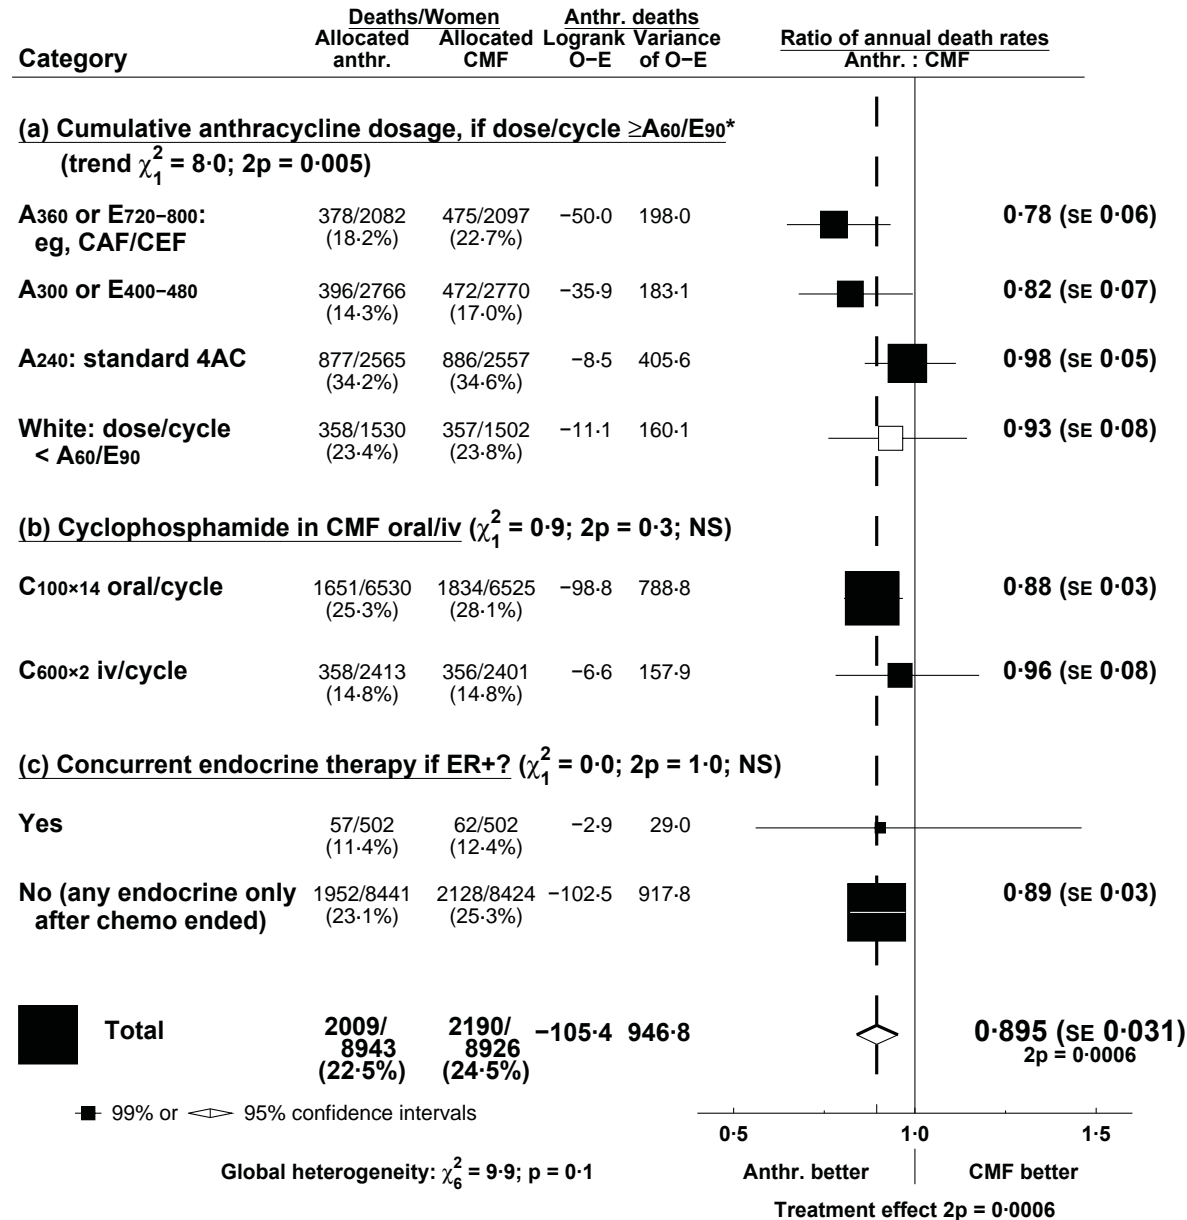

**Trials of any anthracycline-based  
regimen vs standard CMF:**

**subgroup analyses  
by age, stage and ER status**

# Breast cancer mortality ratio: anthracycline-based regimen vs standard CMF, by AGE and STAGE

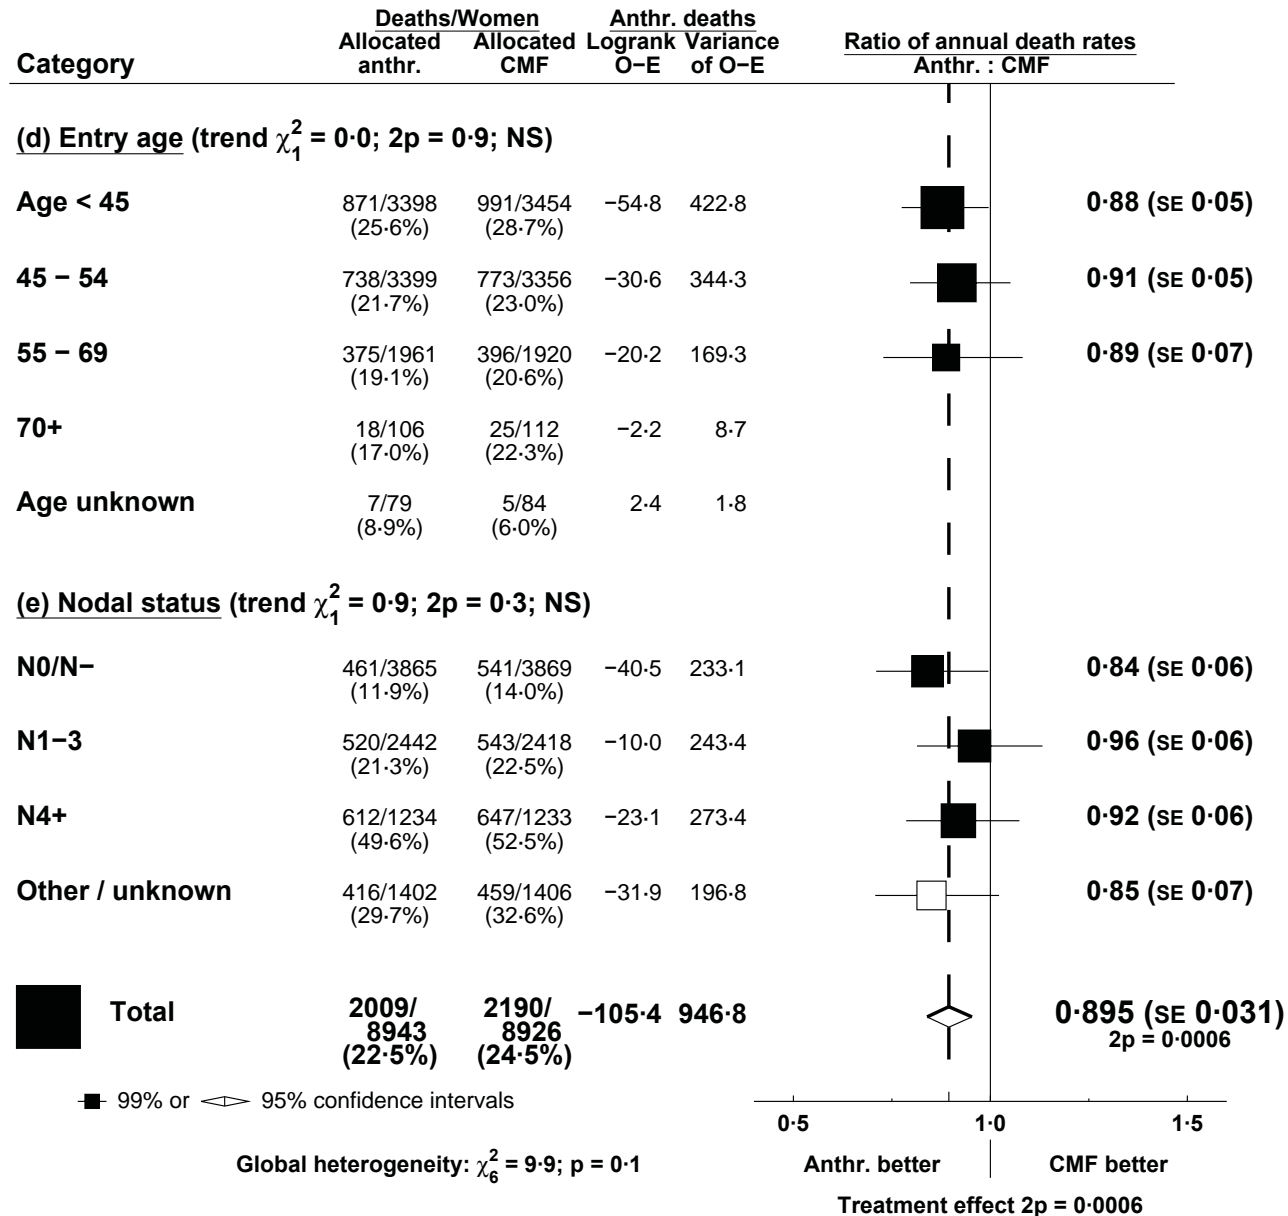



# Breast cancer mortality ratio: anthracycline-based regimen vs standard CMF, by ER STATUS and subsets of ER+

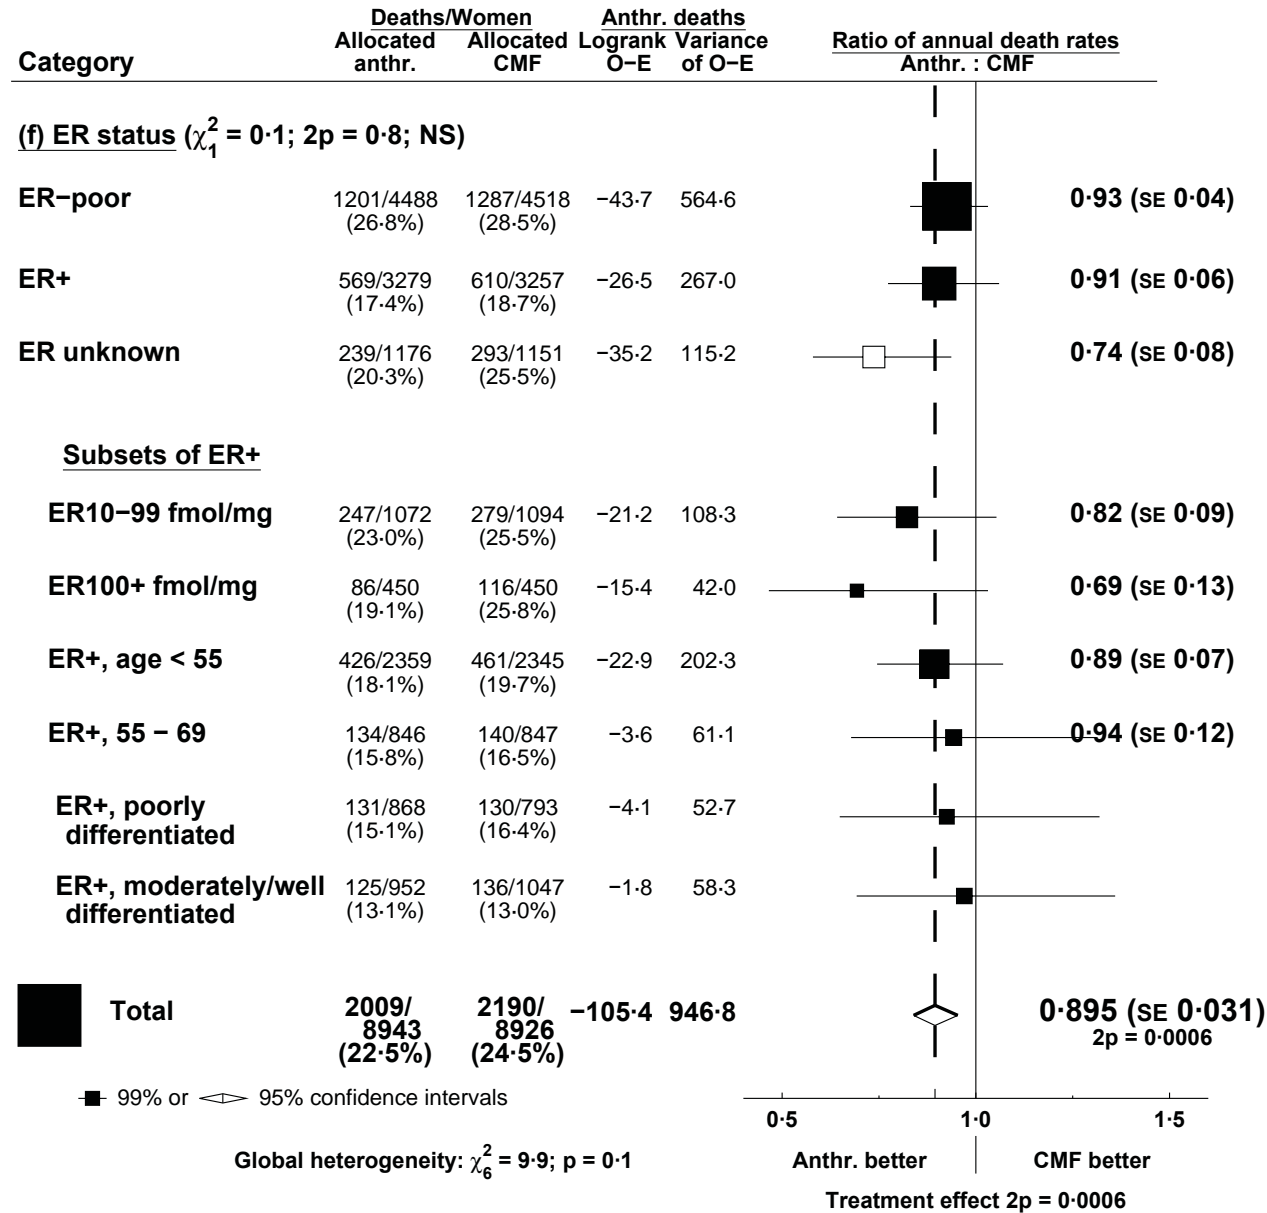

## **Trials of chemotherapy vs no adjuvant chemotherapy**

- Any anthracycline-based regimen  
(eg, standard 4AC) vs nil**
- Standard CMF vs nil**

# Chemotherapy vs no adjuvant chemotherapy

L: anthracycline-based regimen (eg, standard 4AC), R: standard CMF

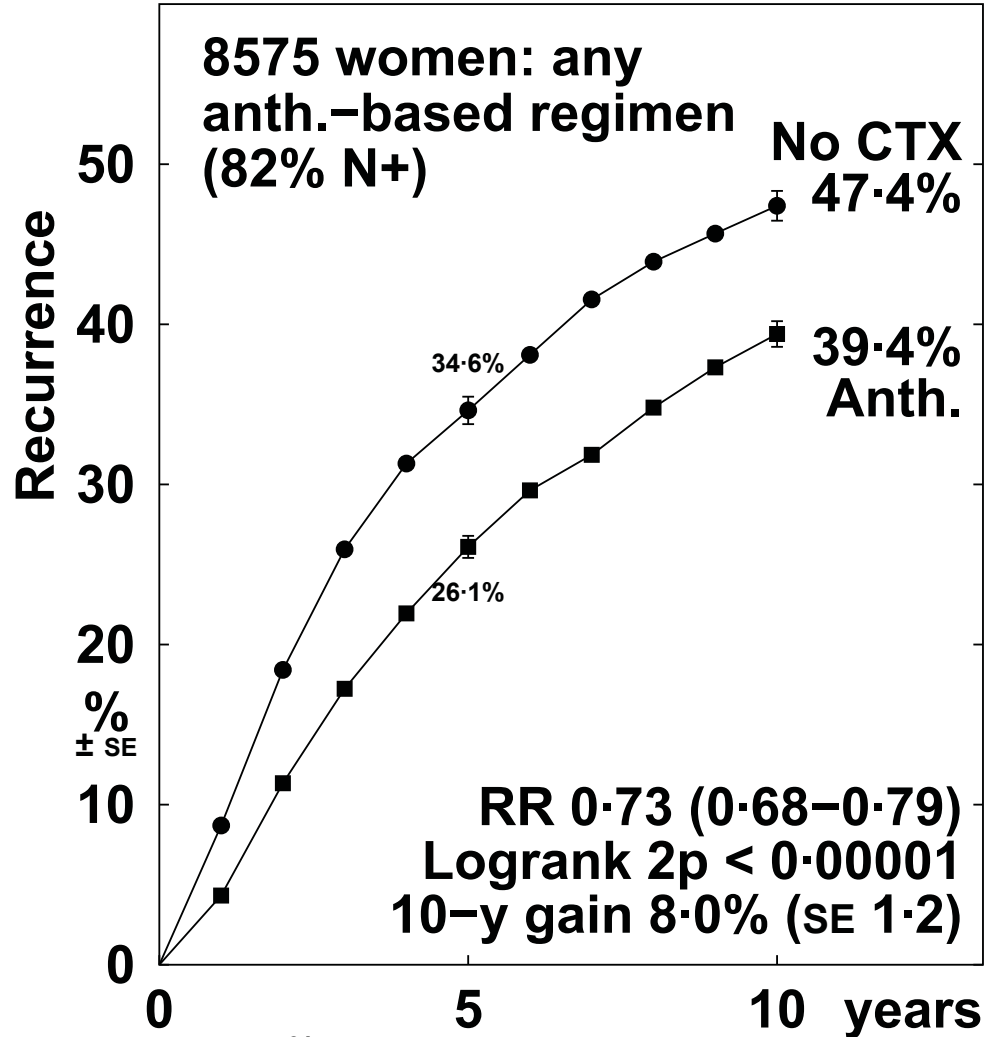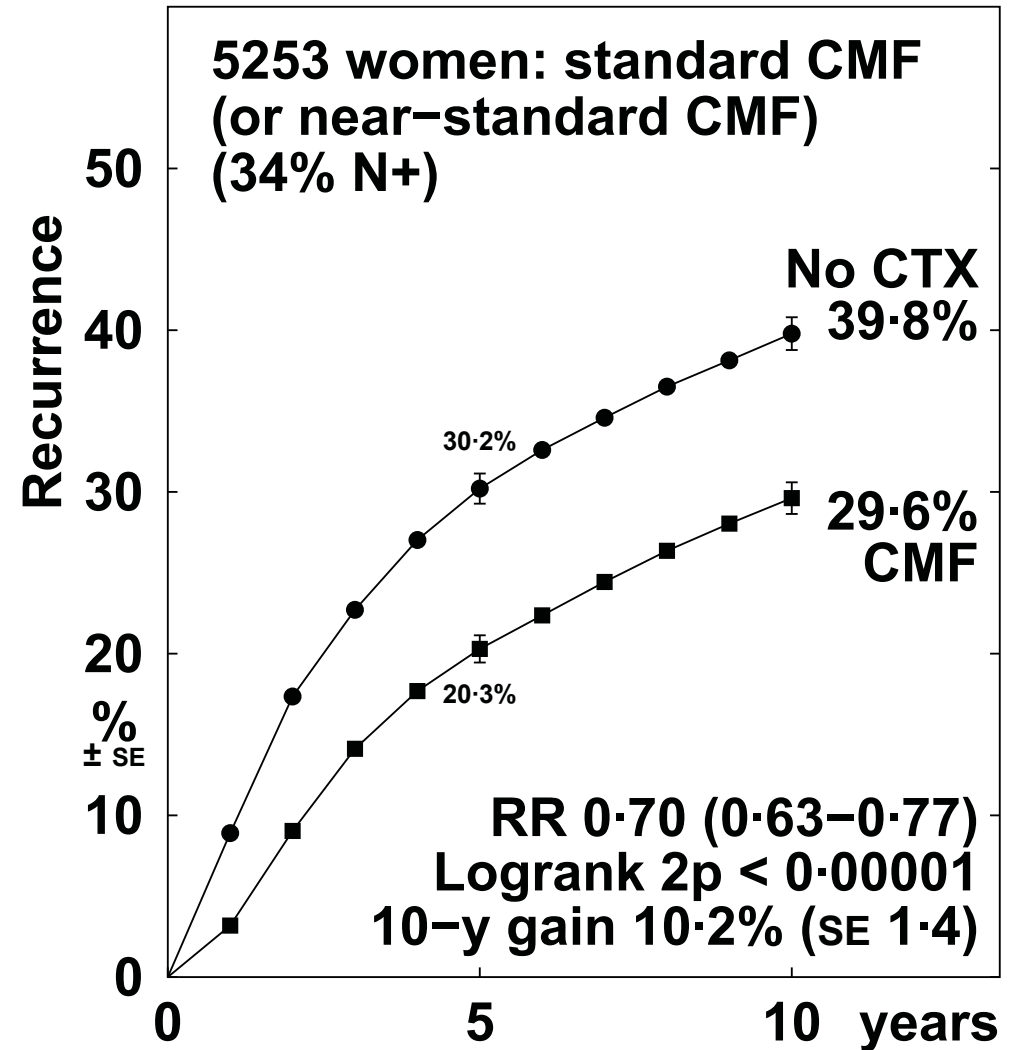

Recurrence rates (% / year) and logrank analyses

| Allocation | Years 0 - 4         | Years 5 - 9        | Year 10+          |
|------------|---------------------|--------------------|-------------------|
| Anth.      | 6.14 (1179 / 19190) | 4.06 (487 / 11981) | 2.91 (161 / 5530) |
| No CTX     | 9.06 (1259 / 13899) | 4.56 (365 / 8011)  | 3.87 (159 / 4104) |
| Rate ratio | 0.69 SE 0.04        | 0.89 SE 0.07       | 0.72 SE 0.11      |
| (O-E) / V  | -185.2 / 489.8      | -20.0 / 174.7      | -21.2 / 65.5      |

| Allocation | Years 0 - 4        | Years 5 - 9       | Year 10+          |
|------------|--------------------|-------------------|-------------------|
| CMF        | 4.83 (549 / 11357) | 2.58 (207 / 8038) | 1.88 (116 / 6155) |
| No CTX     | 7.20 (748 / 10385) | 2.93 (210 / 7158) | 1.90 (100 / 5260) |
| Rate ratio | 0.61 SE 0.05       | 0.84 SE 0.09      | 0.99 SE 0.14      |
| (O-E) / V  | -135.5 / 277.0     | -16.9 / 95.9      | -0.7 / 48.7       |

# Chemotherapy vs no adjuvant chemotherapy

L: anthracycline-based regimen (eg, standard 4AC), R: standard CMF

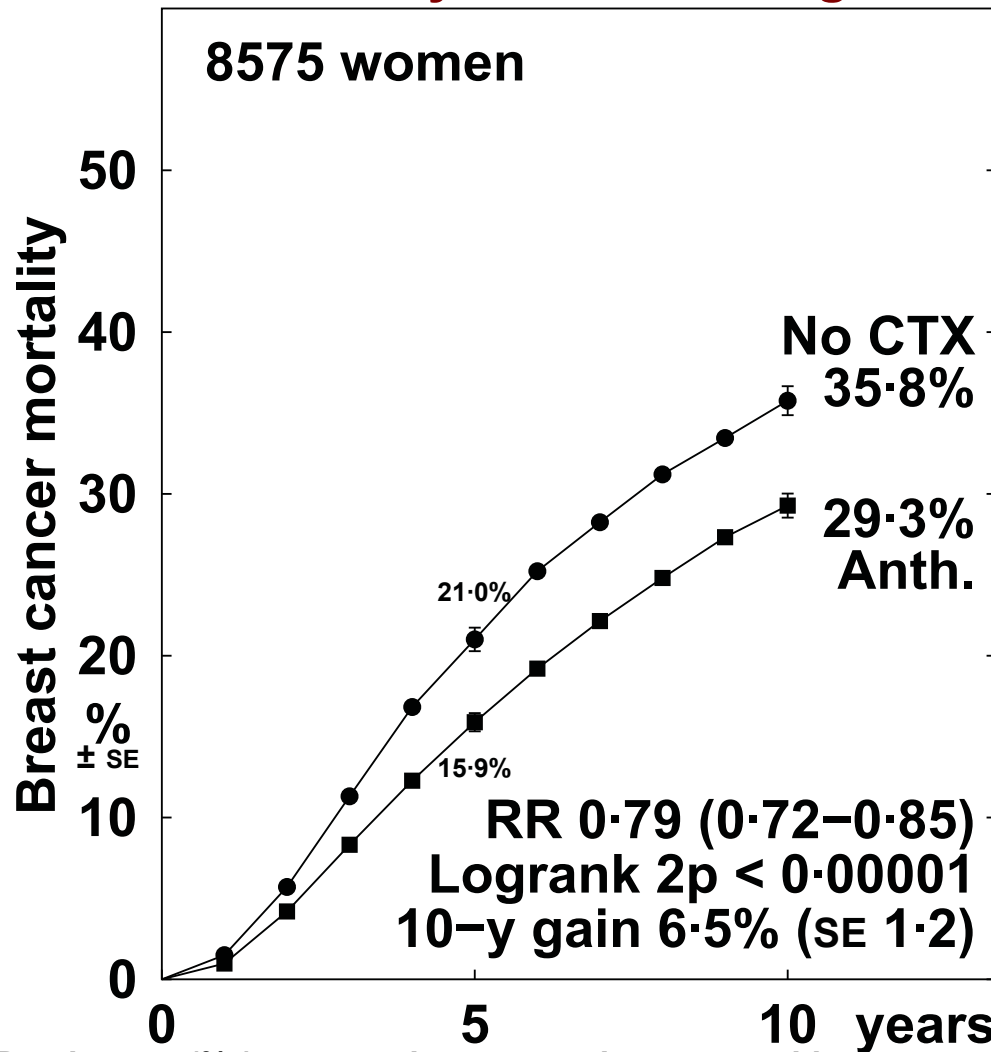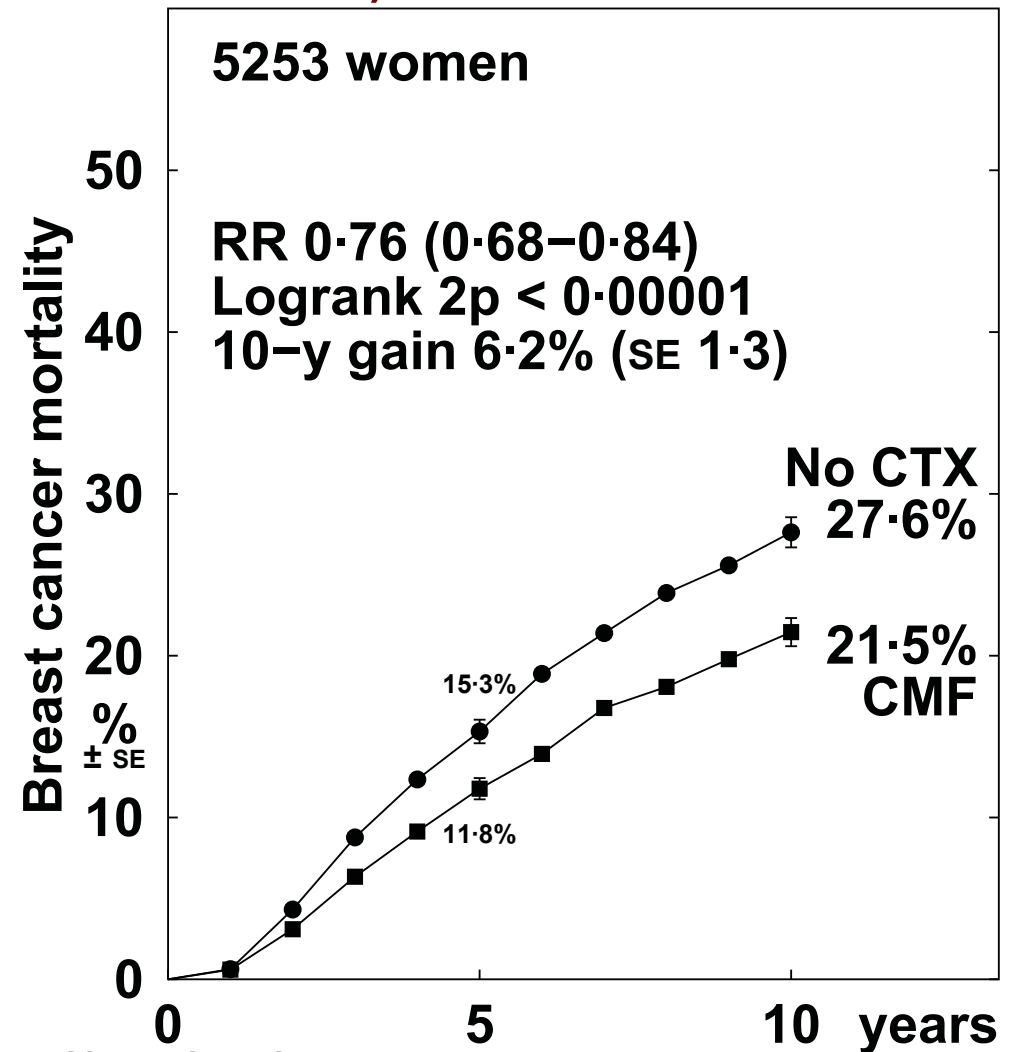

Death rates (% / year: total rate – rate in women without recurrence) and logrank analyses

| Allocation | Years 0 – 4   | Years 5 – 9   | Year 10+     |
|------------|---------------|---------------|--------------|
| Anth.      | 3.38 SE 0.13  | 3.57 SE 0.16  | 2.83 SE 0.19 |
| No CTX     | 4.77 SE 0.17  | 4.31 SE 0.21  | 2.98 SE 0.22 |
| Rate ratio | 0.73 SE 0.05  | 0.83 SE 0.07  | 0.92 SE 0.11 |
| (O-E) / V  | -97.5 / 307.0 | -35.9 / 193.2 | -6.7 / 81.0  |

| Allocation | Years 0 – 4   | Years 5 – 9   | Year 10+     |
|------------|---------------|---------------|--------------|
| CMF        | 2.51 SE 0.14  | 2.42 SE 0.16  | 1.80 SE 0.16 |
| No CTX     | 3.23 SE 0.17  | 3.14 SE 0.19  | 2.10 SE 0.18 |
| Rate ratio | 0.75 SE 0.07  | 0.74 SE 0.08  | 0.82 SE 0.12 |
| (O-E) / V  | -43.5 / 151.3 | -33.7 / 109.6 | -11.9 / 59.1 |

# Chemotherapy vs no adjuvant chemotherapy

L: anthracycline-based regimen (eg, standard 4AC), R: standard CMF

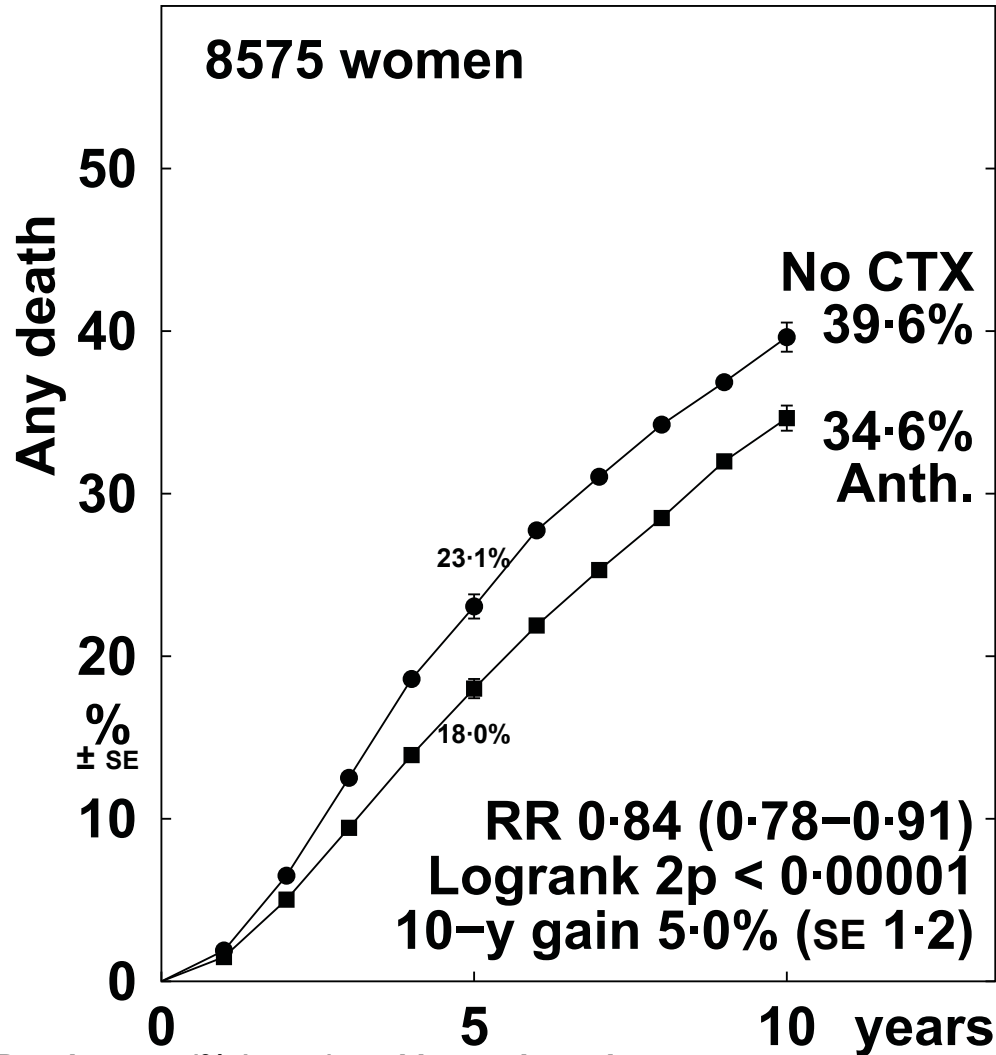

Death rates (% / year) and logrank analyses

| Allocation | Years 0 – 4        | Years 5 – 9        | Year 10+          |
|------------|--------------------|--------------------|-------------------|
| Anth.      | 3.91 (811 / 20718) | 4.62 (645 / 13969) | 4.39 (337 / 7680) |
| No CTX     | 5.25 (834 / 15889) | 4.93 (492 / 9975)  | 4.34 (259 / 5969) |
| Rate ratio | 0.75 SE 0.05       | 0.92 SE 0.06       | 1.00 SE 0.09      |
| (O-E) / V  | -99.0 / 346.4      | -19.1 / 234.6      | -0.1 / 120.2      |

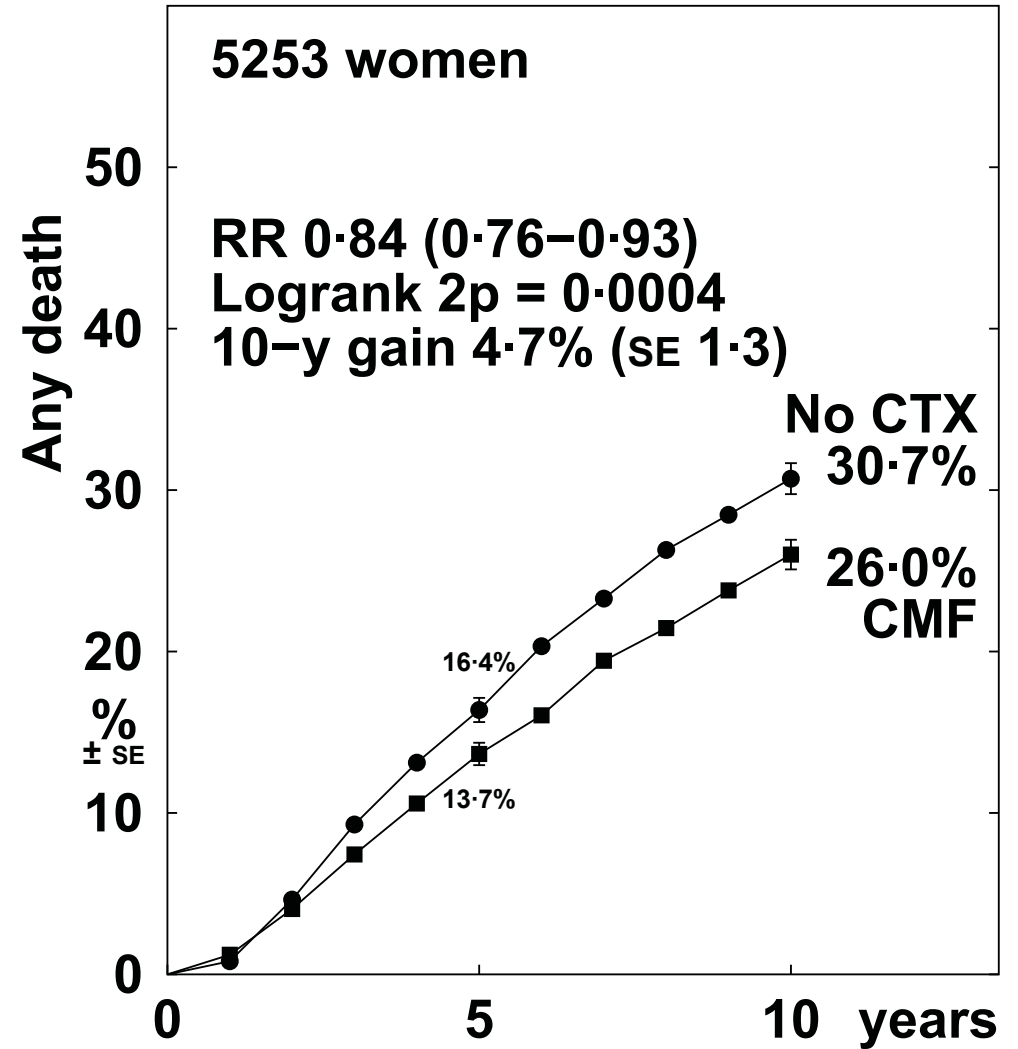

| Allocation | Years 0 – 4        | Years 5 – 9       | Year 10+          |
|------------|--------------------|-------------------|-------------------|
| CMF        | 2.93 (357 / 12167) | 3.15 (286 / 9091) | 3.14 (230 / 7318) |
| No CTX     | 3.49 (410 / 11756) | 3.78 (326 / 8617) | 3.39 (224 / 6612) |
| Rate ratio | 0.82 SE 0.07       | 0.81 SE 0.08      | 0.91 SE 0.10      |
| (O-E) / V  | -33.6 / 170.7      | -28.5 / 137.2     | -8.8 / 96.2       |

# Breast cancer mortality ratio: anthracycline-based regimen (eg, standard 4AC) or standard CMF vs no chemotherapy, by TYPE of treatment comparison

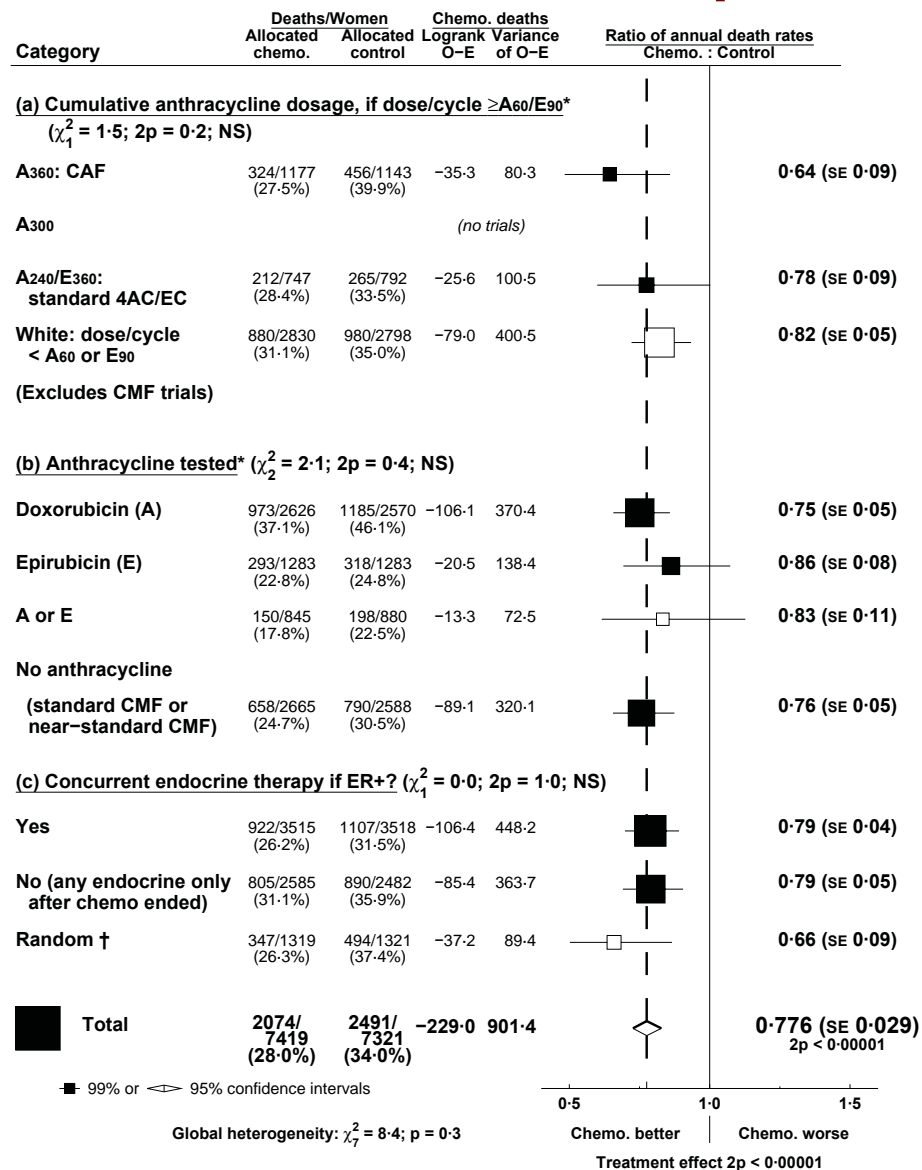

# Chemotherapy (anthracycline-based regimen or standard CMF) + 5 year endocrine therapy vs 5 year endocrine therapy only, ER+ disease only: by ENTRY AGE

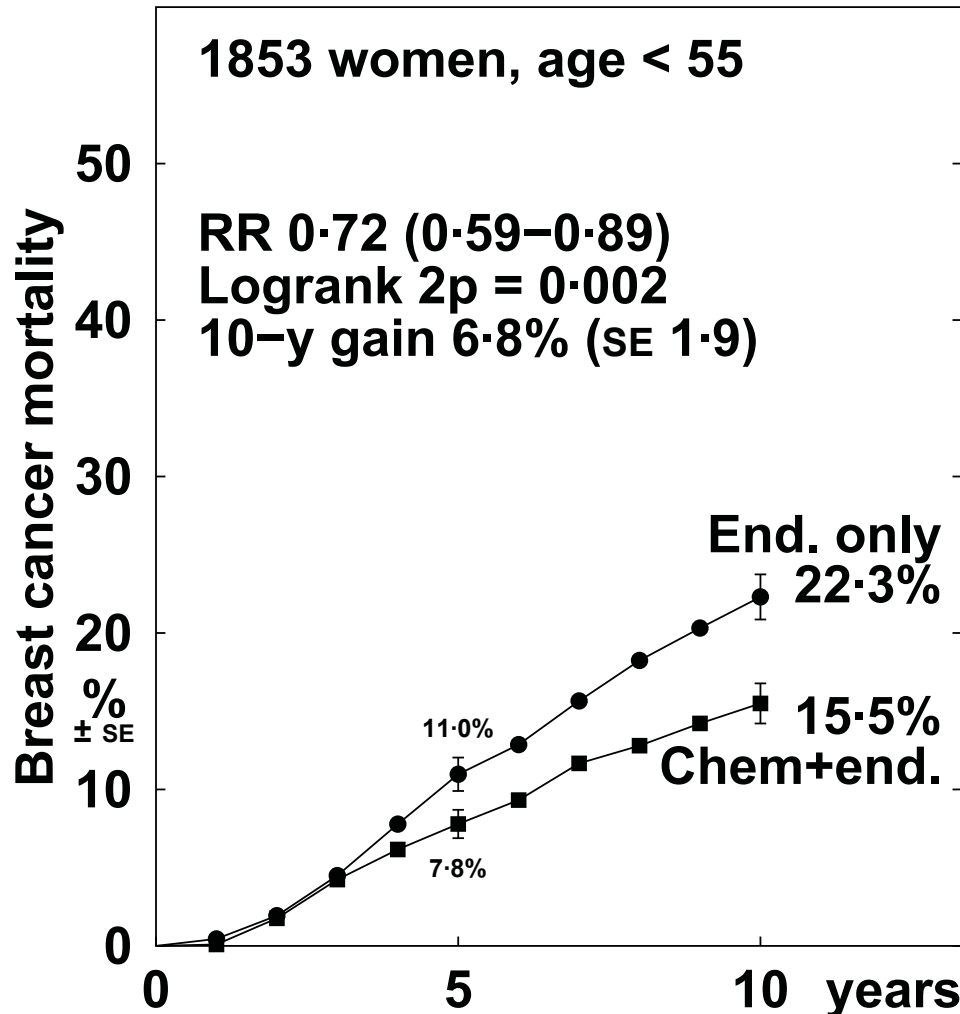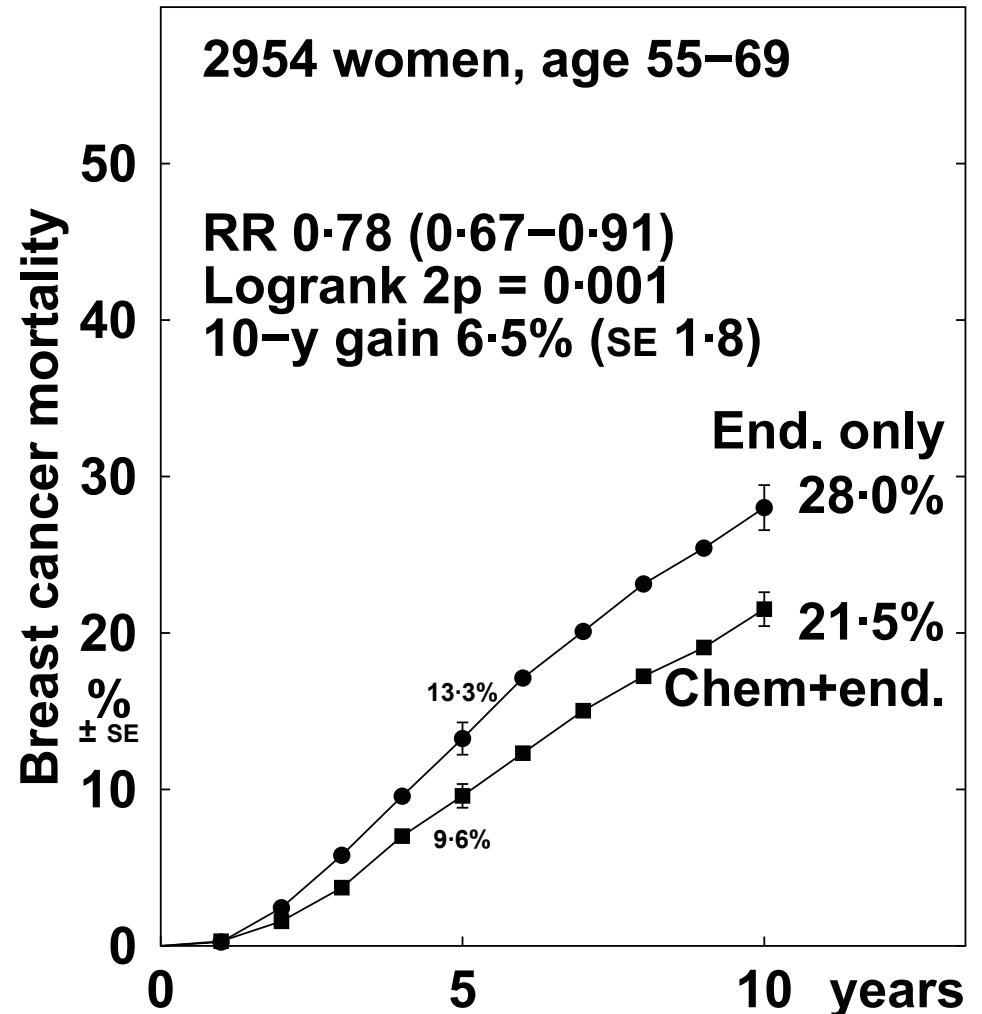

Death rates (% / year: total rate – rate in women without recurrence) and logrank analyses

| Allocation | Years 0 – 4  | Years 5 – 9  | Year 10+     | Years 0 – 4  | Years 5 – 9  | Year 10+     |
|------------|--------------|--------------|--------------|--------------|--------------|--------------|
| Chem+end.  | 1.72 SE 0.19 | 1.99 SE 0.23 | 1.77 SE 0.28 | 2.09 SE 0.16 | 2.88 SE 0.22 | 3.03 SE 0.31 |
| End. only  | 2.20 SE 0.23 | 2.53 SE 0.28 | 1.69 SE 0.29 | 2.75 SE 0.23 | 3.96 SE 0.32 | 2.88 SE 0.35 |
| Rate ratio | 0.71 SE 0.14 | 0.65 SE 0.14 | 0.96 SE 0.24 | 0.70 SE 0.10 | 0.75 SE 0.10 | 1.03 SE 0.17 |
| (O–E) / V  | –13.0 / 37.8 | –14.7 / 33.8 | –0.6 / 16.2  | –23.1 / 66.0 | –19.7 / 69.4 | 1.0 / 34.5   |

**Trials of any anthracycline-based regimen (eg, standard 4AC) vs no adjuvant chemotherapy:**

**Subgroup analyses by age, stage and ER status, and by subsets of ER+ disease**



# Any anthracycline-based regimen (eg, standard 4AC) vs no adjuvant chemotherapy, by ENTRY AGE

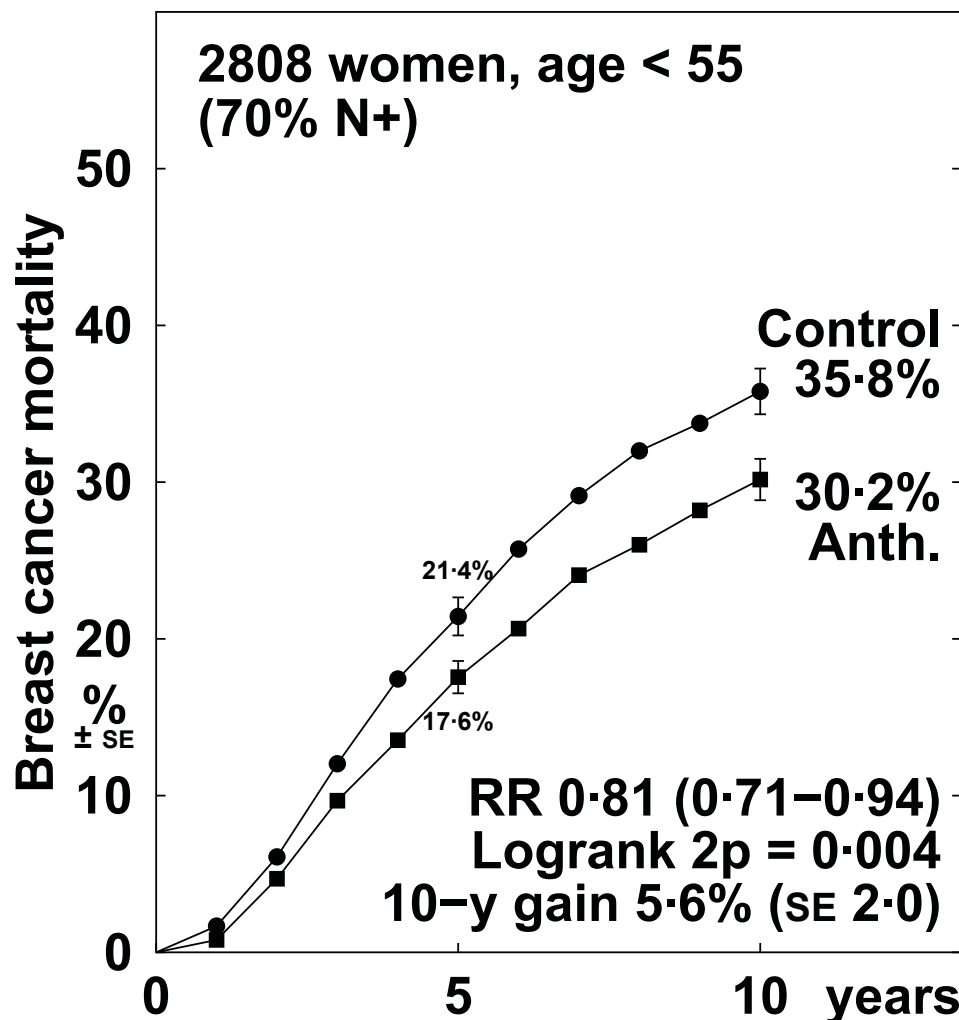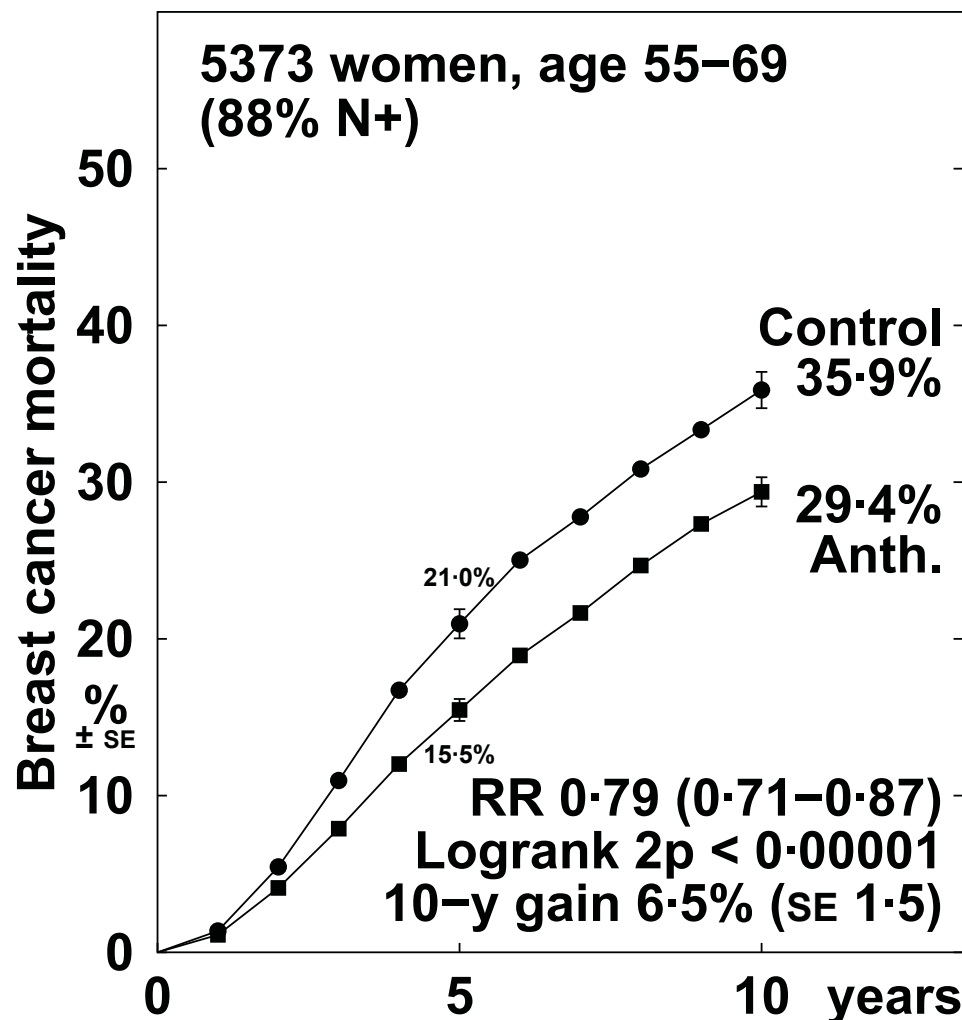

Death rates (% / year: total rate - rate in women without recurrence) and logrank analyses

| Allocation | Years 0 - 4   | Years 5 - 9  | Year 10+     |
|------------|---------------|--------------|--------------|
| Anth.      | 3.81 SE 0.24  | 3.53 SE 0.28 | 1.85 SE 0.25 |
| Control    | 4.77 SE 0.29  | 4.11 SE 0.34 | 2.01 SE 0.28 |
| Rate ratio | 0.79 SE 0.09  | 0.81 SE 0.11 | 0.96 SE 0.21 |
| (O-E) / V  | -25.5 / 108.4 | -13.5 / 63.4 | -0.9 / 21.0  |

| Allocation | Years 0 - 4   | Years 5 - 9   | Year 10+     |
|------------|---------------|---------------|--------------|
| Anth.      | 3.26 SE 0.16  | 3.63 SE 0.20  | 3.43 SE 0.28 |
| Control    | 4.79 SE 0.22  | 4.40 SE 0.27  | 3.65 SE 0.33 |
| Rate ratio | 0.71 SE 0.06  | 0.86 SE 0.08  | 0.94 SE 0.13 |
| (O-E) / V  | -65.9 / 193.2 | -19.2 / 125.4 | -3.5 / 58.3  |

# Any anthracycline-based regimen (eg, standard 4AC) vs no adjuvant chemotherapy, by NODAL STATUS

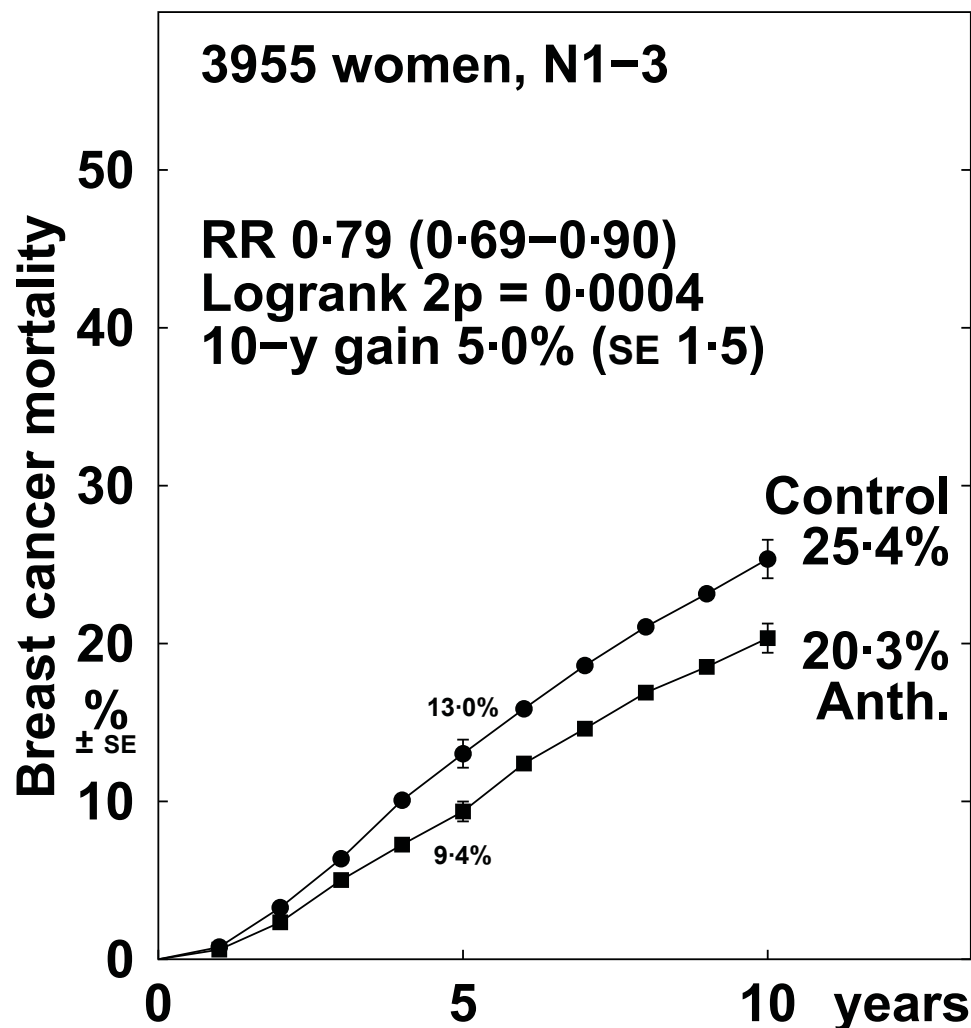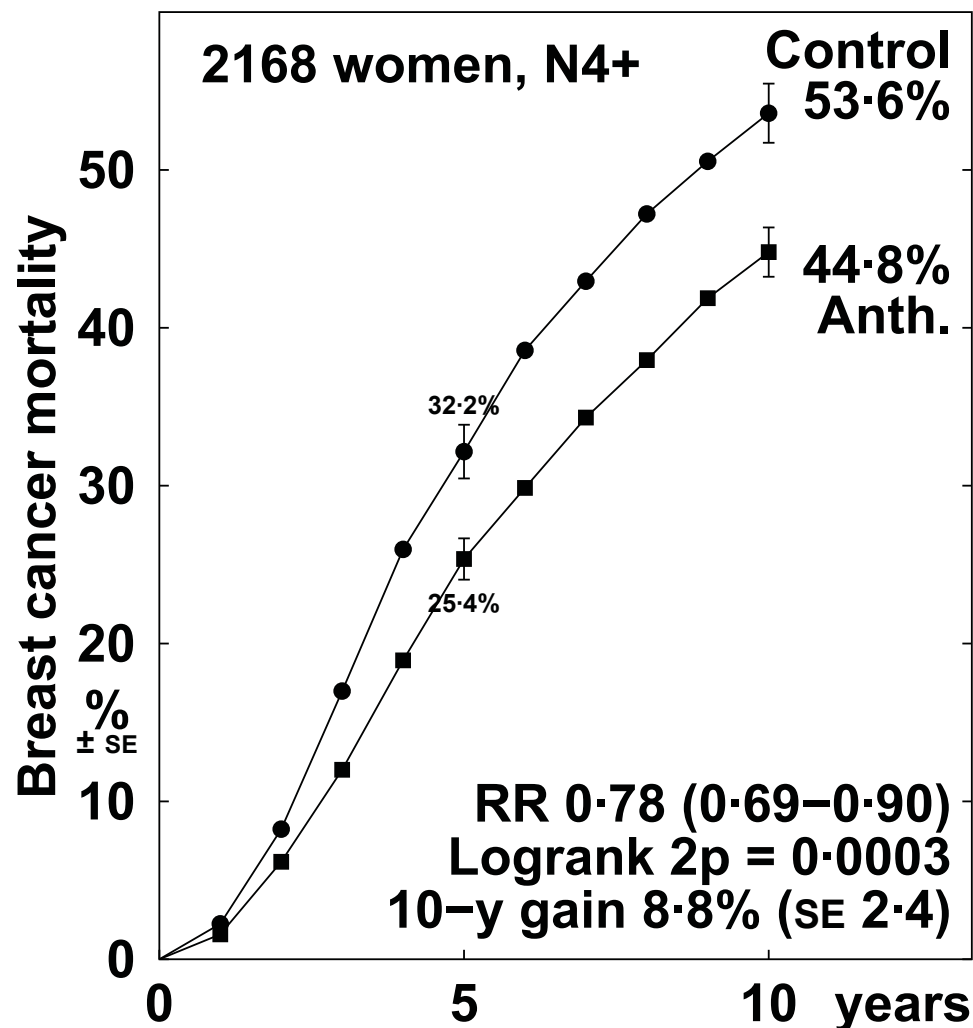

Death rates (% / year: total rate - rate in women without recurrence) and logrank analyses

| Allocation | Years 0 - 4  | Years 5 - 9  | Year 10+     | Years 0 - 4   | Years 5 - 9  | Year 10+     |
|------------|--------------|--------------|--------------|---------------|--------------|--------------|
| Anth.      | 1.91 SE 0.14 | 2.62 SE 0.19 | 2.91 SE 0.27 | 5.53 SE 0.32  | 6.15 SE 0.43 | 4.61 SE 0.53 |
| Control    | 2.92 SE 0.20 | 3.22 SE 0.25 | 3.16 SE 0.33 | 7.87 SE 0.45  | 8.11 SE 0.61 | 4.72 SE 0.61 |
| Rate ratio | 0.71 SE 0.09 | 0.85 SE 0.10 | 0.86 SE 0.14 | 0.74 SE 0.08  | 0.78 SE 0.10 | 1.07 SE 0.20 |
| (O-E) / V  | -32.3 / 92.9 | -12.4 / 78.4 | -6.6 / 42.7  | -36.7 / 120.7 | -19.0 / 75.5 | 1.9 / 26.0   |

# Breast cancer mortality ratio: any anthracycline-based regimen (eg, standard 4AC) vs no adjuvant chemotherapy, by AGE and STAGE

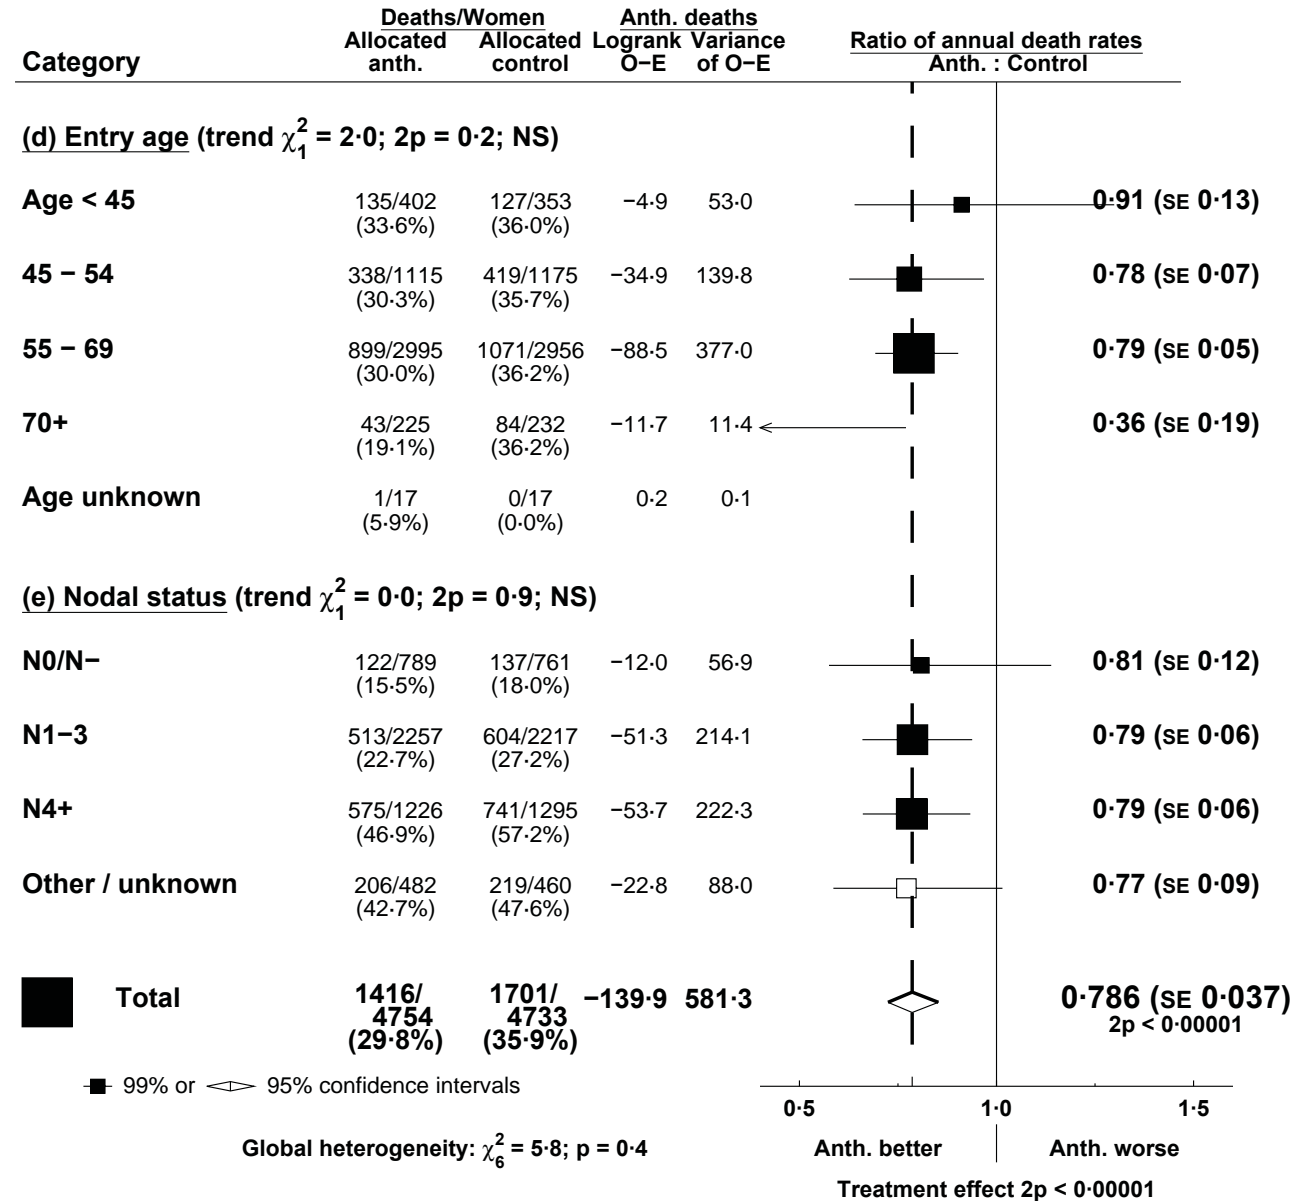

# Any anthracycline-based regimen (eg, standard 4AC) vs no adjuvant chemotherapy, by ER STATUS

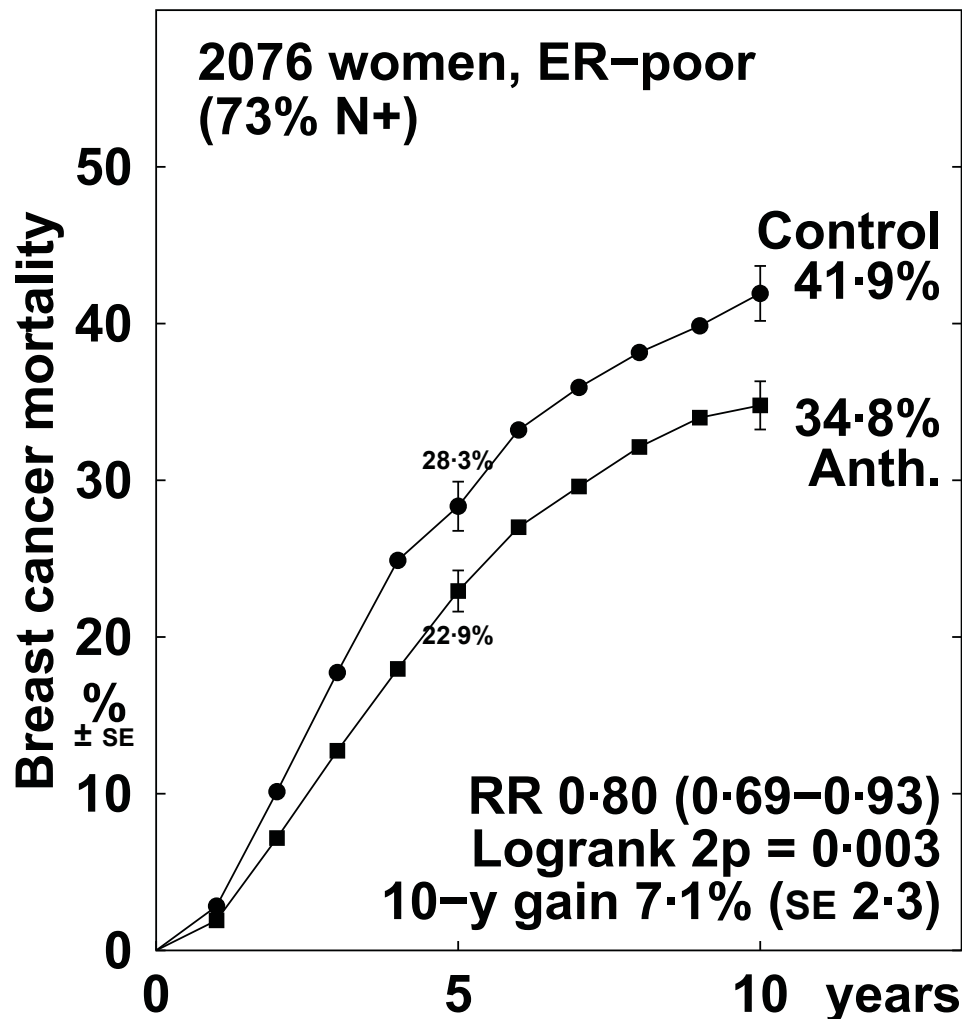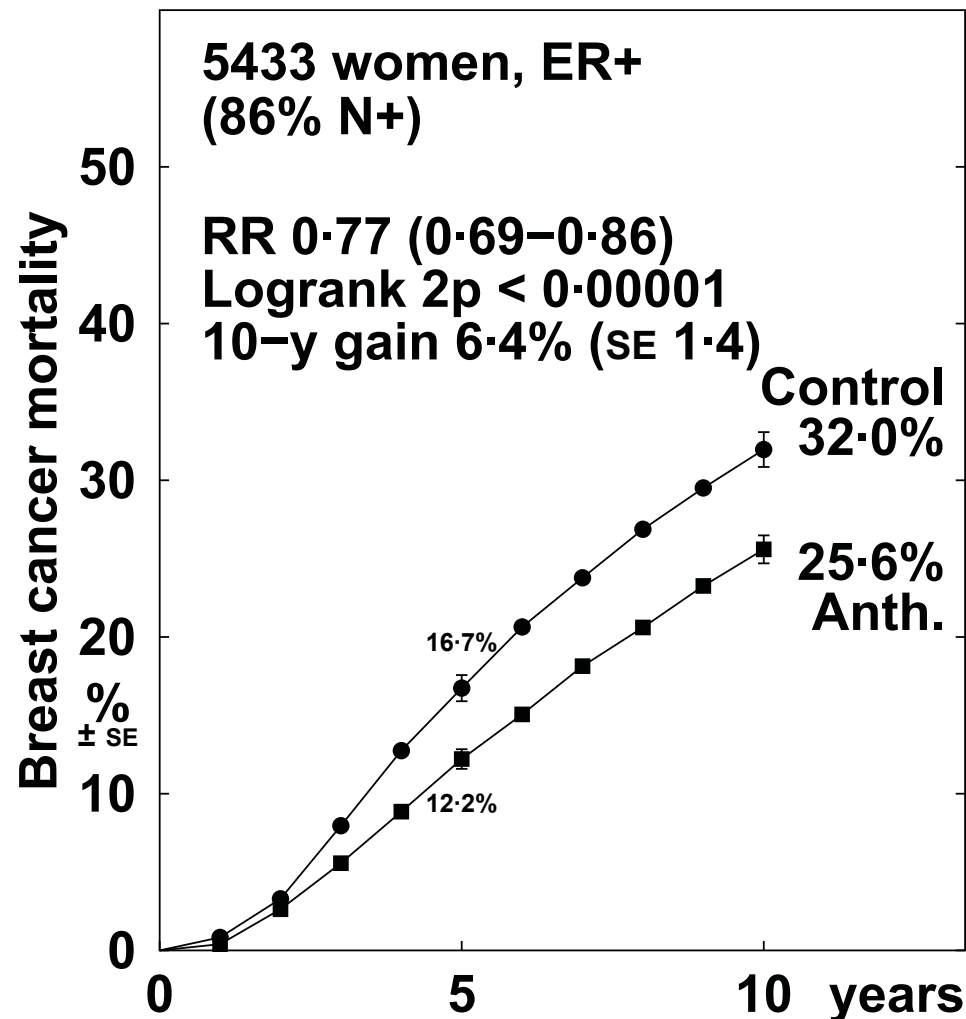

Death rates (% / year: total rate – rate in women without recurrence) and logrank analyses

| Allocation | Years 0 – 4   | Years 5 – 9  | Year 10+     |
|------------|---------------|--------------|--------------|
| Anth.      | 4.96 SE 0.32  | 3.50 SE 0.33 | 2.64 SE 0.36 |
| Control    | 6.84 SE 0.41  | 4.47 SE 0.42 | 2.92 SE 0.41 |
| Rate ratio | 0.76 SE 0.08  | 0.80 SE 0.13 | 0.98 SE 0.20 |
| (O-E) / V  | -29.2 / 107.7 | -10.8 / 48.7 | -0.5 / 24.1  |

| Allocation | Years 0 – 4   | Years 5 – 9   | Year 10+     |
|------------|---------------|---------------|--------------|
| Anth.      | 2.60 SE 0.14  | 3.40 SE 0.19  | 3.09 SE 0.26 |
| Control    | 3.63 SE 0.19  | 4.17 SE 0.25  | 3.14 SE 0.30 |
| Rate ratio | 0.71 SE 0.07  | 0.81 SE 0.08  | 0.92 SE 0.14 |
| (O-E) / V  | -54.3 / 156.2 | -26.4 / 123.3 | -4.0 / 48.9  |

# Breast cancer mortality ratio: any anthracycline-based regimen (eg, standard 4AC) vs no adjuvant chemotherapy, by ER STATUS and subsets of ER+

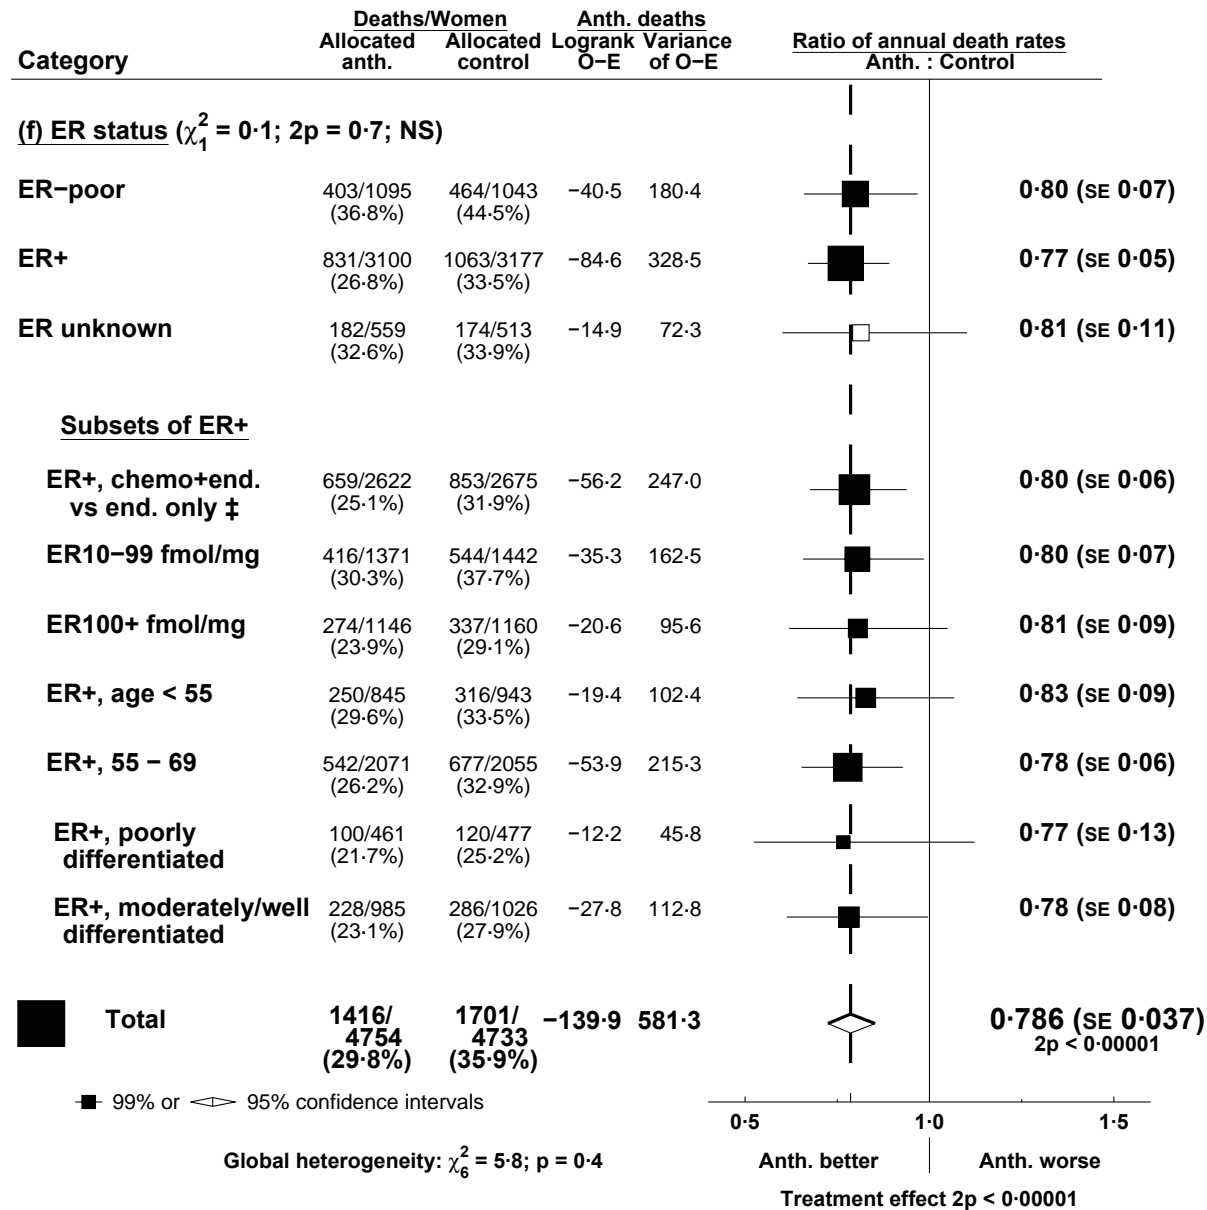

**Any anthracycline-based regimen (eg, standard 4AC)  
vs no adjuvant chemotherapy,  
ER+ disease only: by ENTRY AGE**

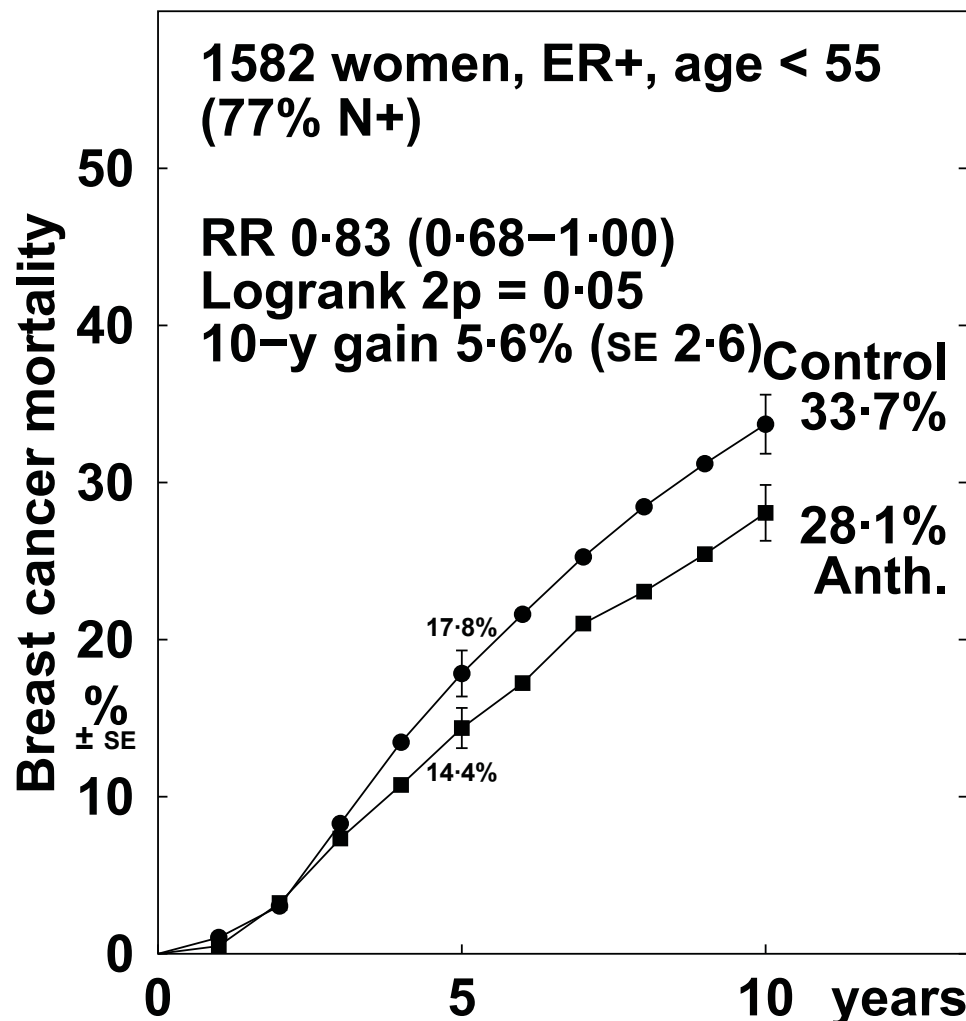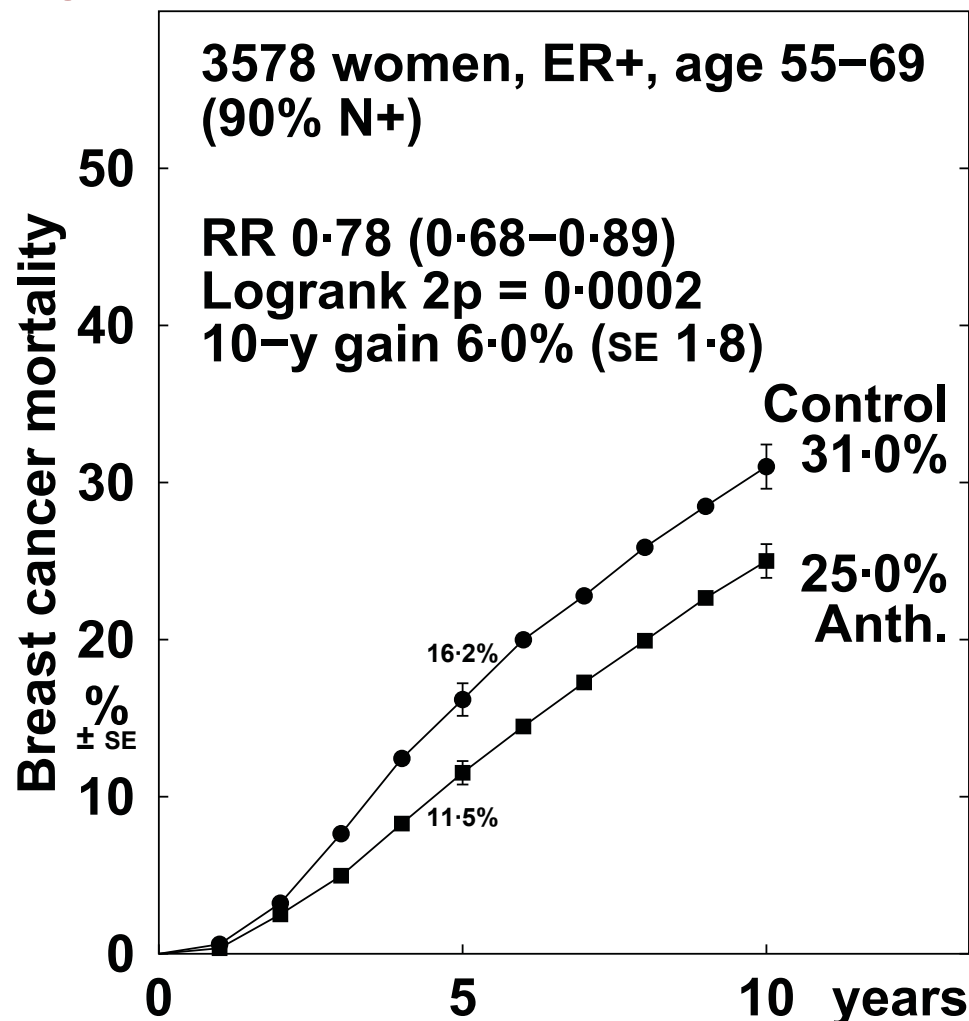

Death rates (% / year: total rate – rate in women without recurrence) and logrank analyses

| Allocation | Years 0 – 4  | Years 5 – 9  | Year 10+     |
|------------|--------------|--------------|--------------|
| Anth.      | 3.12 SE 0.28 | 3.76 SE 0.38 | 2.19 SE 0.39 |
| Control    | 3.76 SE 0.34 | 4.14 SE 0.44 | 1.93 SE 0.39 |
| Rate ratio | 0.79 SE 0.12 | 0.80 SE 0.14 | 1.14 SE 0.33 |
| (O–E) / V  | –12.4 / 52.9 | –8.5 / 38.8  | 1.4 / 10.8   |

| Allocation | Years 0 – 4  | Years 5 – 9  | Year 10+     |
|------------|--------------|--------------|--------------|
| Anth.      | 2.44 SE 0.16 | 3.31 SE 0.23 | 3.42 SE 0.34 |
| Control    | 3.54 SE 0.23 | 4.12 SE 0.32 | 3.76 SE 0.43 |
| Rate ratio | 0.69 SE 0.08 | 0.84 SE 0.10 | 0.92 SE 0.16 |
| (O–E) / V  | –36.8 / 98.4 | –14.0 / 80.4 | –3.1 / 36.4  |

# Halving big risks and halving small risks by chemotherapy

- Proportional risk reduction does not depend much on age, ER status or nodal status (or on tumour grade or tumour diameter)
- Absolute risk reduction, however, depends on the prognosis – and, for ER+ disease, this is the prognosis with endocrine therapy
- Information lacking on tumour gene expression and on quantitative immunohistochemistry
